# Supplementary material for: Circulating microRNAs as biomarkers for stratifying different phases of liver cancer progression and response to therapy
Source: Springer Nature journal article supplement (doi:10.1038/s41598-024-69548-4), 2024-08-09
Supplement: MOESM1 [file 41598_2024_69548_MOESM1_ESM.docx]

**Supplementary Materials**

| Legends to Figures | Legends to Figures 1 to 4 |
| --- | --- |
|  |  |
| Supplementary Figure 1. | Classification of phases of human HCC by PAM analysis |
| Supplementary Figure 2. | PCA diagrams based on miRNA signatures reported in Supplementary Tables 2 to 7 |
| Supplementary Figure 3. | Confirmation of NGS data by droplet digital PCR analyses |
|  |  |
| Supplementary Table 1. | Multi Group Comparison (ANOVA): differential serum miRNAs between Healthy vs Cirrhosis vs HCC early vs HCC advanced (p-value<0.01) |
| Supplementary Table 2. | Two group comparison: differential serum miRNAs between patients with advanced HCC vs. cirrhosis (FC>1.34 UP or DOWN, p-value<0.01) |
| Supplementary Table 3. | Two group comparison: differential serum miRNAs between patients with advanced HCC vs. early HCC (FC>1.31 UP or DOWN, p-value<0.01) |
| Supplementary Table 4. | Two group comparison: differential serum miRNAs between patients with advanced HCC vs. Healthy individuals (FC>1.32 UP or DOWN, p-value<0.01) |
| Supplementary Table 5. | Two group comparison: differential serum miRNAs between patients with early HCC vs. Healthy individuals (FC>1.31 UP or DOWN, p-value<0.01) |
| Supplementary Table 6. | Two group comparison: differential serum miRNAs between patients with cirrhosis vs. healthy (FC>1.21 UP or DOWN, p-value<0.01) |
| Supplementary Table 7. | Two group comparison: differential serum miRNAs between patients with early HCC vs. cirrhosis (FC>1.33 UP or DOWN, p-value<0.01) |
| Supplementary Table 8. | Two group comparison: differential serum miRNAs between sorafenib Responder (R) vs Non-Responder (NR) patients (FC>1.35 UP or DOWN, p-value<0.05) |
| Supplementary Table 9. | KEGG pathways enriched with the target genes of the differential miRNAs between patients with early HCC vs. Cirrhosis (miRNet - miRTarBase v. 8) (p-value<0.05) |
| Supplementary Table 10. | KEGG pathways enriched with the target genes of the differential miRNAs between Sorafenib Responder Vs Non-Responder patients (miRNet - miRTarBase v. 8) (p-value<0.05) |
