# Supplementary material for: Circulating microRNAs as biomarkers for stratifying different phases of liver cancer progression and response to therapy
Source: Springer Nature journal article supplement (doi:10.1038/s41598-024-69548-4), 2024-08-09
Supplement: MOESM2 [file 41598_2024_69548_MOESM2_ESM.xlsx]

## Sheet: Suppl Tab 1
Supplementary Table 1. Multi Group Comparison (ANOVA): differential serum miRNAs between Healthy vs Cirrhosis vs HCC early vs HCC advanced (p-value<0.05)
									SampleType	Normal	Normal	Normal	Normal	Normal	Normal	Normal	Normal	Normal	Normal	Normal	Cirrhosis	Cirrhosis	Cirrhosis	Cirrhosis	Cirrhosis	Cirrhosis	Cirrhosis	Cirrhosis	Cirrhosis	Cirrhosis	Cirrhosis	Cirrhosis	Cirrhosis	Cirrhosis	HCC_Early	HCC_Early	HCC_Early	HCC_Early	HCC_Early	HCC_Early	HCC_Early	HCC_Early	HCC_Early	HCC_Early	HCC_Early	HCC	HCC	HCC	HCC
									SampleName	Jua-139-141	Jua-166-159	Jua-108-110	Jua-134-169	Jua-101-103	Jua-114-123	Jua-145-146	Jua-127-135	Jua-118-20	Jua-087-090	Jua-162-169	Gra_S53	Gra_S55	Gra_S61	Gra_S56	Gra_S60	Gra_S48	Gra_S57	Gra_S49	Gra_S52	Gra_S51	Gra_S59	Gra_S54	Gra_S50	Gra_S58	Gra_S106	Gra-S75	Gra-S76	Gra-S101	Gra-S97	Gra-S105	Gra-S107	Gra-S102	Gra-S111	Gra-S108	Gra-S72	LG771	LG932	LG396	LG766
miRNA		Average log2 reads Healthy	Average log2 reads Cirrhosis	Average log2 reads HCC_early	Average log2 reads HCC_advanced		p-value	q-value
hsa-let-7a-2-3p		0	2.11808	1.40037	0.611767		0.00813925	0.0383293		0	0	0	0	0	0	0	0	0	0	0	0	2.9704	2.2083	3.2047	2.178	0	4.9979	3.2437	3.003	0	4.5457	0	0	3.3014	0	2.9134	4.6596	0	0	0	0	3.7652	4.0659	0	0	0	0	0	4.2094
hsa-let-7a-3p		8.02798	6.67028	6.81911	6.97849		3.59362e-10	2.25499e-08		8.1281	8.3374	8.2929	7.2853	8.3928	7.7413	8.6816	7.6548	7.5232	7.8976	8.3728	7.0758	7.0579	6.9535	6.8892	6.712	5.8145	6.1755	6.3541	7.0412	6.4491	7.0445	6.7926	6.3533	6.6707	6.0928	6.7	6.899	7.1928	7.0444	6.0392	6.8083	6.8737	6.959	7.2509	7.1501	6.778	7.3975	6.2535	7.3729
hsa-let-7a-5p		17.2689	15.7999	16.2407	16.5188		1.36997e-08	6.25206e-07		17.338	17.336	17.482	17.021	17.343	17.265	17.828	17.192	16.802	16.793	17.558	15.873	16.094	16.859	16.065	16.321	15.493	15.962	15.372	16.4	14.86	15.616	15.301	15.014	15.969	16.901	16.174	15.921	16.201	16.388	15.915	16.232	16.094	16.251	16.238	16.333	15.574	16.378	16.759	16.889
hsa-let-7b-3p		11.1661	10.6743	10.7955	11.3405		2.61122e-05	0.000383285		11.111	11.328	11.54	10.87	11.437	10.974	11.592	11.034	10.598	10.93	11.413	10.771	10.901	10.943	10.949	10.142	10.604	10.79	10.498	10.964	10.369	10.928	10.339	10.361	10.881	9.9642	10.654	11.116	10.585	10.747	10.869	11.104	10.724	11.066	10.969	10.952	10.432	11.32	11.257	11.887
hsa-let-7b-5p		16.5487	15.7085	15.9246	16.7479		1.06084e-05	0.000180985		16.55	16.453	16.66	16.54	16.41	16.759	16.837	16.748	16.535	15.831	16.713	15.432	15.798	16.558	15.762	16.028	15.965	16.076	15.837	16.063	15.442	14.962	14.657	15.619	15.72	17.237	16.102	15.99	15.234	15.729	15.848	16.202	15.662	15.654	15.995	15.518	15.587	16.875	16.877	16.981
hsa-let-7c-5p		12.1004	11.1551	11.0062	11.9229		3.77303e-08	1.4349e-06		12.055	12.192	12.325	11.875	12.199	11.997	12.408	12.165	11.764	11.8	12.324	10.799	11.238	11.319	11.725	10.434	11.267	11.8	11.293	11.503	11.036	11.075	10.399	10.963	11.321	11.774	11.019	11.134	10.418	10.89	10.793	11.523	10.613	11.167	10.967	10.77	10.529	12	11.764	12.239
hsa-let-7d-3p		8.73285	9.10215	8.68665	9.16225		1.97672e-05	0.000310097		8.5408	8.5812	8.796	8.7988	8.4807	8.9972	8.8255	8.9541	8.962	8.7711	8.3539	9.3042	9.2983	9.1835	9.3072	9.0999	9.0295	8.8606	9.1084	9.5751	8.7765	9.0418	9.0201	8.7532	9.0718	9.0118	8.9752	8.6189	8.7828	8.5908	8.8371	8.674	8.782	8.0659	8.4303	8.7843	9.5095	9.1431	9.8951	9.2256
hsa-let-7d-5p		12.8923	12.3154	12.2099	12.8372		9.99521e-05	0.0011352		12.925	12.853	13.105	12.583	12.828	12.792	13.124	13.189	12.745	12.593	13.078	12.313	12.313	13.039	12.426	12.747	11.97	12.655	11.942	12.768	11.967	12.098	11.911	12.009	12.258	12.91	12.324	12.07	12.051	12.287	12.063	12.114	12.139	12.004	12.064	12.283	11.811	12.53	13.222	13.097
hsa-let-7e-5p		11.878	9.94356	10.4964	10.8995		5.2726e-12	5.09008e-10		11.99	11.793	12.111	11.46	12.287	11.811	12.456	11.149	11.743	11.735	12.123	10.284	10.396	10.139	10.872	9.4362	10.01	9.4974	9.92	10.374	8.8984	10.549	9.6914	9.0035	10.139	10.255	9.8179	10.578	10.54	10.94	10.066	10.295	10.646	10.862	10.104	11.356	10.151	11.779	11.36	11.143
hsa-let-7f-1-3p		5.91476	5.40104	5.44843	5.0566		0.000150263	0.00158471		5.8936	5.8628	6.3765	5.5691	6.339	5.5798	6.3256	5.7803	5.5148	5.545	6.2759	5.7679	5.5147	4.8574	5.6641	4.5931	5.499	4.7755	5.0697	5.5355	5.5035	5.8295	5.3433	5.9907	5.6707	4.835	5.6139	5.6991	5.7726	5.4173	4.8277	4.4864	6.3502	5.7504	5.3344	5.8457	4.8711	5.3714	5.2726	5.238
hsa-let-7f-5p		16.5754	15.2112	15.3423	15.9103		1.44162e-08	6.46155e-07		16.659	16.613	16.635	15.924	16.815	16.38	17.295	16.504	16.345	16.241	16.918	15.507	15.525	16.19	15.602	15.741	14.768	14.958	14.658	15.717	14.269	15.13	15.049	14.415	15.428	15.036	15.758	15.009	15.902	15.938	14.785	14.618	15.55	15.061	15.347	15.761	15.513	15.942	15.759	16.204
hsa-let-7g-3p		0.344664	2.75526	3.15362	0.583692		2.93259e-05	0.000415865		0	0	0	0	0	3.7913	0	0	0	0	0	3.7819	3.8449	3.3927	3.0978	4.451	0	3.7755	0	4.1499	0	4.1096	3.7304	0	4.24	0	3.679	5.0746	3.0823	3.2474	4.0392	0	4.2246	3.959	3.3344	4.0493	0	0	0	0
hsa-let-7i-3p		0.361182	3.83881	3.60829	2.82973		2.39856e-05	0.000360133		0	0	0	0	0	0	0	3.973	0	0	0	3.5409	4.6709	5.1583	4.0412	5.2655	4.8145	4.891	4.7842	4.8961	0	4.3441	4.0352	0	3.3014	6.0928	4.6359	0	4.2079	4.3178	3.9017	4.7759	4.1575	0	3.7129	3.8888	3.4561	0	4.1946	3.8875
hsa-let-7i-5p		15.6058	15.0622	15.3197	15.8663		9.33417e-05	0.00108711		15.555	15.563	15.547	15.187	15.603	15.686	16.108	15.744	15.621	15.195	15.855	14.856	15.119	15.883	15.275	15.461	15.072	15.385	14.962	15.485	14.6	14.635	14.415	14.726	14.997	16.108	15.423	15.315	15.3	15.284	15.28	15.219	15.148	15.071	15.339	15.03	15.19	15.564	16.615	16.067
hsa-miR-100-5p		5.92015	6.54289	7.11213	5.50787		1.27668e-05	0.00021082		5.8061	6.0513	5.9125	6.0837	5.9447	6.4612	5.9319	5.973	5.6432	5.9856	5.3284	5.9269	7.0789	5.3488	7.3631	5.4132	6.735	7.4385	6.5916	6.0783	6.9581	6.3972	6.3294	7.1375	6.8039	5.5209	7.8907	6.8647	8.0407	7.6014	8.006	8.0846	6.273	7.3671	5.6849	6.8994	5.5715	6.2992	3.6097	5.266
hsa-miR-101-5p		9.45871	9.76404	9.88062	10.6725		2.36945e-05	0.000358273		9.6103	9.6939	9.5464	9.3764	9.4807	9.3149	9.5122	9.776	9.483	8.9761	9.2759	9.1649	9.6203	9.9081	9.4967	9.2725	9.577	10.144	9.1017	9.9117	10.74	9.6714	9.4308	10.968	9.6894	11.098	9.5659	10.102	8.8493	9.6058	9.8134	10.496	9.4587	10.27	10.008	9.4197	10.126	9.7919	11.654	10.792
hsa-miR-103b		11.7101	12.1671	12.1929	11.9995		0.00645925	0.032232		11.901	11.745	11.829	11.13	11.855	11.417	12.219	11.707	11.498	11.541	11.969	12.414	12.245	13.074	12.266	12.523	11.734	12.215	11.601	12.082	11.875	11.912	12.382	11.927	12.09	12.344	12.098	12.338	12.2	12.315	11.596	12.049	12.061	12.134	12.55	12.437	12.038	11.936	11.492	12.372
hsa-miR-105-5p		0	2.60771	2.82928	4.06355		3.72696e-07	1.08775e-05		0	0	0	0	0	0	0	0	0	0	0	3.4737	2.9704	2.2083	0	3.0525	3.4665	4.2495	3.6911	2.5176	0	4.1096	2.9648	0	3.8039	0	3.8394	4.7376	0	3.3178	4.1647	3.7759	0	3.8435	3.4719	3.9713	0	5.5684	3.8321	4.61
hsa-miR-106a-3p		0.708355	3.50926	2.93245	3.14763		0.000330825	0.00305283		0	4.2439	0	0	0	0	0	0	3.548	0	0	3.605	2.7074	4.9387	2.7192	3.5931	3.7076	4.9275	3.6911	3.1957	4.4491	4.666	3.8908	0	3.0384	4.3114	0	4.0746	4.3233	3.5104	0	3.9014	4.1575	4.5065	3.4719	0	3.193	3.4732	3.7252	4.3205
hsa-miR-106b-3p		7.75525	9.99519	9.8857	9.06823		2.55876e-13	3.56805e-11		7.8061	7.7033	7.0989	7.9841	7.5433	8.4194	7.8445	8.0027	8.3317	7.0415	7.5323	9.7007	9.8551	10.735	9.3588	10.167	10.366	10.504	10.332	9.9279	10.63	8.9994	9.4599	10.651	9.2459	11.119	10.078	10.294	9.451	9.9956	9.3313	10.287	9.2966	9.6401	9.7905	9.4596	8.4372	8.4976	9.4718	8.8533
hsa-miR-107		11.2843	11.6903	11.6777	11.2834		0.00290424	0.0176933		11.467	11.224	11.234	10.729	11.38	11.117	11.804	11.304	11.297	11.099	11.472	11.639	11.707	12.704	11.558	12.296	11.263	11.715	11.14	11.729	11.665	11.213	11.784	11.732	11.519	12.267	11.668	11.605	11.768	11.809	11.178	11.523	11.447	11.524	11.84	11.826	11.285	11.195	11.049	11.447
hsa-miR-1185-2-3p		0	3.54118	4.18064	0		2.43108e-16	6.78001e-14		0	0	0	0	0	0	0	0	0	0	0	3.9883	3.5554	3.0708	4.1522	2.178	4.4665	4.5125	4.7384	0	4.9966	0	4.2867	5.2708	4.3603	3.8964	4.679	4.1901	4.8708	3.2474	4.3871	3.9014	3.9351	4.2585	4.0125	4.6087	0	0	0	0
hsa-miR-1199-3p		0	2.84006	3.33729	1.17411		6.79966e-06	0.000122785		0	0	0	0	0	0	0	0	0	0	0	3.5409	0	2.9968	2.9823	3.4999	3.5921	3.7755	3.8717	2.8961	0	4.0222	4.3433	0	4.24	0	3.9134	4.7376	3.9448	2.5104	4.6672	0	4.3502	4.4285	3.7129	4.4452	0	4.0138	0	0
hsa-miR-122-3p		2.27541	4.76769	4.79885	4.12355		0.00356165	0.0203176		0	0	4.8619	0	4.1373	0	3.5814	5.1954	3.4105	0	3.843	3.7253	4.1928	2.9968	5.3042	3.2369	4.8145	5.306	4.1766	4.8104	5.2081	4.9764	5.0352	5.2708	7.6937	0	6.6027	5.2445	5.6453	4.5693	7.2522	7.1991	3.9351	5.0659	4.0125	3.2608	5.3305	5.8718	0	4.2094
hsa-miR-1227-5p		5.31789	5.65281	5.94603	5.13614		0.00797817	0.0377834		5.8505	5.3434	5.8094	5.7617	5.7223	4.2388	5.3039	5.6734	5.0428	5.0596	4.691	5.4034	5.4298	5.3927	5.7724	4.4757	5.914	6.2495	6.0322	5.2401	6.0706	5.3441	6.1821	5.7069	5.9259	6.1694	6.1765	6.899	6.0986	5.0129	6.4624	4.9014	6.3198	5.718	5.4719	6.1764	5.6525	5.8467	4.7796	5.5656
hsa-miR-1229-5p		4.42969	3.29318	2.90914	4.37457		0.00434506	0.0237605		4.5066	4.137	4.755	5.0837	4.7223	3.7913	4.1664	4.7803	3.548	4.545	4.691	3.1689	3.5554	2.6558	2.8567	3.0525	3.8145	3.9979	3.2437	3.3656	4.3336	4.2701	3.5498	0	4.24	4.3114	3.2919	3.9491	3.2079	0	4.8277	4.2233	0	4.0659	0	4.1233	4.9155	5.2992	4.5483	4.5656
hsa-miR-1233-3p		0.338082	1.04881	2.38578	2.88287		0.00172383	0.0120984		0	0	0	0	0	0	3.7189	0	0	0	0	0	0	2.0708	3.4848	1.915	0	3.1906	0	0	0	4.0222	0	0	0	0	0	4.8116	2.9448	2.8323	4.4866	4.3164	3.4656	0	0	3.3863	3.8711	4.0138	4.4842	3.4725
hsa-miR-1236-5p		0	0.629529	1.08682	2.3052		0.00285233	0.0174193		0	0	0	0	0	0	0	0	0	0	0	0	0	2.3339	0	2.763	0	0	0	0	0	0	0	0	3.7165	0	0	0	3.7928	0	0	3.7759	0	0	0	4.3863	4.041	3.7142	0	3.4725
hsa-miR-1237-5p		5.82634	3.48514	5.11801	6.27329		5.21823e-08	1.87111e-06		5.561	5.8628	6.3399	6.603	5.7223	4.9758	5.3888	5.9116	5.4105	6.545	5.769	4.7253	3.4729	2.8364	3.3042	2.841	4.177	5.2495	4.4847	3.2832	0	4.8295	4.5498	0	5.0384	4.9553	4.3464	5.8819	4.9448	3.7834	5.3871	5.4039	5.3799	5.3029	5.6849	5.2276	6.8598	6.2992	6.1332	6.2798
hsa-miR-1238-5p		1.61916	3.2221	4.13909	3.48498		0.00553948	0.0287275		0	0	5.2244	0	0	0	0	4.1954	4.548	0	3.843	4.1689	3.1928	2.7489	2.8567	3.0525	4.5921	3.7755	4.3692	3.6551	0	4.1096	4.2867	0	4.3014	4.6333	4.1765	5.3476	4.5298	3.6803	5.1033	0	4.6232	4.346	4.3344	4.7556	4.041	3.4732	0	4.1505
hsa-miR-1246		6.21085	6.1383	6.29122	7.47693		0.00144872	0.0105706		6.639	5.8289	6.8094	6.7617	6.37	5.8865	5.2595	5.8474	6.374	6.5957	5.9473	6.7957	5.909	4.6558	8.1555	5.193	6.2359	6.863	6.4281	5.8104	5.9186	6.2316	5.8327	5.5757	6.3312	5.866	6.6683	5.9815	6.0492	5.6397	7.294	6.3608	5.8527	6.7504	5.8951	6.8457	10.161	10.324	7.1946	7.2238
hsa-miR-1252-5p		0.7041	3.14469	2.98831	1.53208		0.00269608	0.016709		0	0	0	0	0	0	0	0	3.548	4.1971	0	3.0814	3.3855	0	2.9823	2.841	4.0071	3.065	3.7842	3.5176	4.0706	4.5457	0	4.5053	4.24	0	4.2919	5.3965	3.6229	3.6803	3.9017	0	4.2888	3.718	0	3.9713	3.6785	0	0	3.8135
hsa-miR-1253		0.408973	2.8668	4.0399	2.73188		5.47575e-06	0.000104917		0	0	0	4.4987	0	0	0	0	0	0	0	3.4034	3.2923	0	2.7192	0	3.329	0	3.5916	3.4436	4.6555	4.6071	2.9648	4.5053	3.6234	4.4813	3.8394	5.534	3.3233	3.0129	4.9017	3.9014	4.0871	3.8435	3.7129	3.8014	3.3305	3.4732	0	3.3729
hsa-miR-1255b-5p		6.19555	5.91259	5.72428	6.80197		0.00027932	0.0026063		6.0915	6.0513	6.3765	5.8206	6.3073	6.3543	6.4689	6.1429	6.4461	5.9856	6.106	5.6513	5.494	6.2407	5.1522	5.178	5.762	6.3738	6.1418	5.8539	6.8361	5.7226	5.3153	7.0902	5.9644	7.0393	6.3464	6.4896	4.6229	5.6803	5.5797	5.674	4.8527	5.468	5.6849	5.5293	6.193	6.4061	7.6321	7.0002
hsa-miR-125a-5p		11.0207	11.0095	10.4047	11.1099		0.00477855	0.0256285		10.715	10.893	10.257	11.337	11.248	11.386	11.37	10.683	11.39	10.75	11.199	10.915	11.06	11.082	12.191	10.885	11.314	11.234	11.256	11.237	10.418	11.605	9.9213	10.455	10.56	10.819	9.7936	9.534	10.54	10.998	10.144	10.493	10.586	10.404	10.374	10.766	10.698	11.532	10.983	11.294
hsa-miR-125b-1-3p		5.59957	5.07194	5.55985	5.79988		0.00599898	0.0304807		5.7603	5.9284	5.8619	6.2642	5.2748	5.4612	4.6518	5.4755	6.0886	6.0596	4.769	5.4213	5.3162	4.4213	4.8236	4.6805	5.3647	4.9979	5.1418	4.2401	4.9966	5.6946	5.5009	4.9907	5.4169	5.1188	5.9134	6.4896	5.5771	5.2653	6.0716	4.9014	6.1575	5.718	5.0568	4.8888	6.119	5.9911	6.2535	5.9918
hsa-miR-1262		1.82709	4.27126	4.84203	2.73743		0.000652852	0.00539032		0	3.896	0	0	0	0	3.5814	0	3.9955	4.6446	3.9805	3.4034	3.909	2.6558	3.7192	4.1166	4.5921	6.9806	4.9937	4.9771	4.2081	5.666	4.4502	0	6.1259	4.1188	5.2919	6.512	5.1148	3.6259	4.7497	5.1238	6.032	5.6508	3.3344	3.7082	3.778	3.4732	0	4.9579
hsa-miR-1263		0	2.84953	2.3871	3.89809		1.97306e-05	0.000310097		0	0	0	0	0	0	0	0	0	0	0	5.0356	4.4729	3.3927	0	3.178	0	3.7755	3.1062	3.9506	0	4.7771	3.9648	0	4.24	0	3.9838	4.297	0	3.8323	4.8277	0	0	5.4285	0	3.8888	5.2287	4.8718	0	4.266
hsa-miR-126-3p		16.9565	15.7651	15.7684	16.4051		6.90777e-10	3.853e-08		16.958	16.994	16.996	16.711	17.284	16.691	17.384	16.701	16.752	16.836	17.214	15.798	16.173	16.079	16.356	15.364	15.575	15.465	15.597	15.857	15.167	16.213	15.879	15.12	16.068	15.333	15.53	15.071	16.442	16.046	15.907	15.4	15.821	15.969	15.826	16.107	16.157	17.194	16.081	16.811
hsa-miR-126-5p		13.7887	12.8448	12.6284	13.5594		1.59064e-08	7.0044e-07		13.901	13.869	13.802	13.531	14.036	13.567	14.236	13.624	13.689	13.6	13.821	13.133	13.317	13.007	13.396	12.51	12.535	12.647	12.603	13.14	11.979	13.414	13.138	11.834	13.174	12.663	12.449	11.701	12.965	12.775	12.812	12.321	12.443	12.928	12.783	13.072	13.534	14.153	13.294	13.85
hsa-miR-1269b		0	2.08431	2.1702	0.289933		0.000868385	0.00685423		0	0	0	0	0	0	0	0	0	0	0	0	3.6334	0	0	2.4004	3.4665	3.6931	3.3692	3.8961	0	4.4816	0	0	4.24	3.6333	4.2354	4.7376	3.0823	0	0	0	4.2246	3.959	0	0	0	0	0	0
hsa-miR-1271-5p		0	1.65751	1.73271	0		0.00137716	0.0100927		0	0	0	0	0	0	0	0	0	0	0	2.4034	0	0	2.7192	3.2369	3.7076	0	4.1062	0	0	0	3.2279	0	3.8039	0	0	3.8116	0	2.9254	4.4866	0	0	0	3.7129	4.1233	0	0	0	0
hsa-miR-1273a		0.359991	1.31794	0	0		0.00641891	0.0321586		0	0	0	0	0	0	3.9599	0	0	0	0	2.5409	0	2.4493	0	2.9854	0	3.413	0	3.7193	0	0	3.3433	0	0	0	0	0	0	0	0	0	0	0	0	0	0	0	0	0
hsa-miR-127-3p		5.19982	4.67998	6.95917	5.43178		0.00207557	0.0137823		5.2656	5.3908	6.0989	4.4987	5.5703	4.7913	3.9599	5.5975	4.789	5.545	5.691	6.7749	4.6709	4.2725	5.8067	5.2078	7.2925	4.413	5.9542	5.6051	0	3.9291	6.0692	0	5.5238	5.4407	6.5688	7.2311	7.1621	7.9942	7.1647	8.1238	8.3312	4.959	7.9666	5.6087	5.2287	4.4732	5.6097	5.0574
hsa-miR-1275		0	3.1316	1.58771	3.32598		0.000415269	0.00363179		0	0	0	0	0	0	0	0	0	0	0	2.6664	0	6.8626	0	7.7172	3.4665	3.8535	3.4847	4.3656	0	4.6071	3.1023	0	3.7165	0	3.1765	4.297	3.4303	3.0954	0	0	3.4656	0	0	0	4.3947	4.4061	3.6097	7.0494
hsa-miR-127-5p		0	1.95118	1.23935	0.250525		0.00315303	0.0184909		0	0	0	0	0	0	0	0	0	0	0	2.9883	0	2.0708	0	2.2935	4.0071	0	3.9542	0	0	3.6071	4.2867	0	4.1088	0	3.3989	0	3.8708	2.5104	0	0	3.8527	0	0	0	0	0	0	0
hsa-miR-1276		4.89046	4.77513	4.8674	3.71348		0.00219685	0.0144348		4.9761	5.2945	5.142	5.3467	4.6228	4.3319	5.0144	4.6359	5.0428	4.545	4.843	5.5077	4.8449	4.3927	5.012	3.451	4.3994	5.2203	4.0322	4.3656	4.3336	5.8295	5.3708	4.8838	5.2083	4.4813	5.0509	5.8116	5.5298	3.3178	4.6672	4.7088	5.2888	5.1165	4.5974	4.9713	5.1565	4.4732	4.6097	3.4725
hsa-miR-1277-5p		10.5751	9.56502	9.70046	9.44332		0.000119125	0.00130569		10.963	10.653	10.693	9.6925	10.788	9.954	11.305	10.357	10.612	10.745	10.564	9.7836	9.9816	9.6139	9.5547	9.7754	8.8337	8.0975	8.7814	10.329	9.084	10.614	9.941	9.0475	10.473	8.516	9.117	8.8295	10.173	9.8789	9.8395	9.5186	9.994	9.8696	10.224	10.745	9.8004	9.5818	9.3262	9.5471
hsa-miR-128-3p		10.3755	10.4739	10.2062	10.7857		0.00060344	0.00505711		10.157	10.354	10.032	10.243	10.271	10.73	10.705	10.462	10.624	10.046	10.507	10.22	10.254	10.927	9.834	11.332	10.555	9.9543	10.485	10.432	10.709	10.327	10.362	10.705	10.538	10.597	10.055	9.7773	10.26	10.48	9.635	10.412	10.101	10.153	10.516	10.282	10.679	10.276	11.237	10.678
hsa-miR-1284		0.705227	3.03264	4.3767	2.81238		2.56889e-05	0.000381534		0	0	0	0	0	0	4.347	0	3.4105	0	0	3.6664	3.3855	2.3339	3.5672	4.0525	0	3.306	3.5916	3.7807	5.2081	0	0	4.9907	4.5744	3.6333	4.801	5.3965	2.9448	3.5693	4.6672	4.7088	4.0131	5.4285	4.536	4.4452	0	0	3.6097	3.1505
hsa-miR-1290		1.87165	4.39125	5.14126	4.59109		6.66523e-06	0.00012123		4.5066	3.896	0	0	4.5158	0	3.5814	4.0884	0	0	0	4.6664	4.1403	3.7933	5.6068	3.9854	4.255	5.5598	4.4281	4.7503	4.3336	5.5768	4.9648	0	5.4169	4.5593	5.9134	6.1621	5.2953	4.1734	5.7497	4.6384	5.3198	5.1165	4.8704	4.7556	6.3947	6.2992	3.7252	4.1505
hsa-miR-1292-3p		2.49425	2.89307	1.41582	4.12365		0.00413659	0.0228194		0	4.2439	5.3765	0	0	4.0323	0	4.6359	4.4105	4.7377	0	2.9883	2.8449	2.0708	0	2.841	3.914	3.413	3.9542	3.1026	4.3336	4.4145	3.4502	0	3.1759	0	0	3.8116	0	0	0	0	4.2246	3.718	3.8198	0	4.4561	4.1837	3.8321	3.1505
hsa-miR-1292-5p		5.66563	5.46006	5.87373	5.2648		0.00322977	0.0188528		6.1637	5.7585	6.0087	5.9316	5.2077	5.2388	5.2595	5.2949	5.8699	5.7821	5.8065	5.8229	5.3855	5.1239	4.7192	5.2513	5.5307	5.278	5.934	5.2181	5.5035	5.9048	5.8523	4.9907	5.9259	5.7377	5.5688	6.4669	6.7726	5.4012	5.5339	5.6384	6.1575	6.1893	5.536	5.6087	5.8018	5.5057	5.9555	4.9918
hsa-miR-1294		6.46836	5.88449	6.08759	6.98554		0.00216978	0.014332		5.8936	6.8459	6.6395	6.3467	6.9029	7.0598	6.2819	6.4755	7.0659	5.2613	6.379	5.3852	5.7778	6.3488	5.8236	5.9768	6.7885	6.235	6.6791	6.6303	4.9966	5.5457	5.3708	4.7683	6.0563	7.4094	6.4244	7.1761	5.2953	5.6936	6.2522	5.9312	5.6478	5.468	5.8198	5.8457	6.5853	6.1635	8.8159	6.7051
hsa-miR-1296-5p		0	3.4112	2.44523	2.05987		4.40463e-05	0.000572831		0	0	0	0	0	0	0	0	0	0	0	4.0356	3.5554	3.2725	2.8567	3.9854	4.177	3.9979	4.1062	3.2832	0	4.666	5.1975	0	4.6234	0	2.9134	4.3965	2.9448	3.9698	0	4.5644	4.2888	0	3.8198	0	3.3305	4.2617	3.6097	2.8875
hsa-miR-1303		3.88609	5.36091	5.36955	4.9192		0.00392498	0.0220396		4.9761	5.2439	5.3765	0	4.2748	4.7242	3.8445	4.388	5.374	4.545	0	5.0122	4.8117	5.8364	5.3281	5.193	4.914	5.413	5.0322	5.1957	5.9966	5.0222	5.9467	5.8272	5.5238	6.5012	5.3464	4.6596	5.0823	5.48	5.2236	5.4864	5.1915	5.0134	5.0125	6.0681	4.778	5.1431	6.154	4.4725
hsa-miR-1305		0.376118	0.786257	2.65965	0.586292		0.00310505	0.0184684		0	0	0	0	4.1373	0	0	0	0	0	0	0	0	0	0	0	0	0	3.2437	3.6551	0	0	0	0	4.1088	0	3.0509	4.8819	4.2668	2.7328	0	4.0169	3.2246	3.5805	0	3.5018	0	0	0	3.9579
hsa-miR-1307-3p		8.07959	8.84226	9.06358	8.59202		1.62557e-06	3.84923e-05		8.1898	8.4309	8.1313	7.154	8.2583	8.4715	7.8742	7.9503	8.468	8.0952	7.852	9.0828	9.1635	8.577	8.9615	9.5022	8.8867	8.3026	9.044	8.8067	8.4421	8.4015	9.364	8.172	9.085	8.4763	9.1033	8.7184	9.5742	9.3528	9.0796	8.9201	9.4482	8.6249	9.065	9.3366	9.1472	8.9356	8.8513	8.2764
hsa-miR-1307-5p		5.53835	6.14327	6.2277	5.26481		5.12441e-06	9.89404e-05		5.6135	6.0215	5.4468	5.0837	5.4004	6.2626	5.4689	4.7099	6.176	5.8252	4.9134	6.3388	6.1536	5.9088	5.7896	7.6154	6.4165	6.306	6.4281	5.7193	5.3336	5.6071	6.5133	5.4313	6.4444	6.3114	5.9491	5.8116	6.5418	6.3348	6.4866	6.3608	6.5334	5.7821	6.0999	6.2932	5.7291	5.0582	5.1946	5.5429
hsa-miR-130b-5p		5.53415	5.49971	5.40641	3.6815		2.02788e-05	0.000314197		5.8505	5.6065	6.7269	5.9841	5.339	5.2388	5.5814	4.6359	5.6121	4.8252	5.4753	5.2712	5.3627	5.3927	5.7896	5.451	5.499	4.6931	5.399	5.588	5.793	6.1719	5.3153	5.5757	5.6937	5.3114	5.2919	5.8472	5.7314	5.5837	5.5797	5.4864	5.4931	4.959	4.7129	5.4738	4.9586	4.3357	3.9316	4.3729
hsa-miR-132-5p		0	2.51571	2.07913	2.41662		0.00301821	0.0181672		0	0	0	0	0	0	0	0	0	0	0	3.0814	0	4.3636	3.6452	5.4634	0	4.2495	3.6911	0	0	4.7226	2.9648	0	3.0384	4.0118	3.1765	4.1901	0	3.7834	0	0	0	0	3.8198	3.8888	3.5715	0	3.7252	0
hsa-miR-134-3p		0	1.11263	2.56082	1.09901		0.00724305	0.0350966		0	0	0	0	0	0	0	0	0	0	0	0	0	0	0	0	3.7076	0	3.9542	3.9506	0	0	0	0	3.9644	3.6333	3.3989	5.3965	4.0823	0	0	0	4.0131	3.8435	0	3.8014	4.119	0	0	0
hsa-miR-134-5p		8.44691	6.57491	7.42514	7.21657		0.0016256	0.0115261		9.4679	8.6654	9.1044	7.5691	8.7041	8.3708	7.7673	9.7717	6.9834	7.8462	8.6657	8.2463	6.743	5.5818	7.334	7.0849	7.5617	5.1292	7.5916	7.9338	4.4491	5.8295	7.6982	4.5053	6.3603	4.7708	6.9402	7.7934	7.8517	8.1969	8.3008	7.7258	9.1227	6.0659	8.2121	6.6962	7.8935	6.782	8.3646	6.7254
hsa-miR-135a-3p		0	0.437429	1.89988	1.80464		0.00384282	0.0216753		0	0	0	0	0	0	0	0	0	0	0	0	0	0	0	0	0	0	0	2.7807	0	0	3.3433	0	0	0	3.4984	4.0746	3.2079	2.6259	0	0	4.1575	0	3.3344	0	3.3305	3.4732	0	0
hsa-miR-138-2-3p		5.97132	5.07441	5.3293	5.32646		0.00311987	0.0184858		6.3911	6.2179	6.4121	6.306	6.1373	5.3763	5.617	5.7803	5.374	6.2295	5.843	4.636	4.8449	3.8782	4.6452	3.841	5.499	4.9631	5.7842	4.7193	5.9581	5.7226	4.9648	5.9382	5.6472	5.2656	5.3464	5.8819	5.2376	3.7834	5.6672	5.5259	5.5201	6.0134	5.2219	5.1589	5.515	5.8964	5.451	5.6317
hsa-miR-140-3p		10.7276	11.937	11.7707	11.5201		5.42168e-08	1.91668e-06		10.578	10.65	10.654	10.737	10.553	10.961	10.896	10.725	10.936	10.639	10.675	11.574	11.899	12.73	11.327	12.954	12.194	11.977	12.153	11.793	12.117	11.402	11.748	12.029	11.221	12.406	11.346	11.109	11.177	12.167	11.298	12.321	11.858	11.624	12.311	11.861	11.22	10.409	12.001	11.575
hsa-miR-141-5p		0.361182	5.92351	5.95841	2.10404		1.20586e-15	2.75156e-13		0	0	0	0	0	0	0	3.973	0	0	0	5.8229	6.0579	4.7933	6.2428	3.9506	6.5921	5.7755	6.2272	5.6051	6.3032	6.8035	6.4758	6.3533	5.9259	5.4813	6.437	7.0132	6.3644	5.8081	5.3346	4.3164	7.4726	6.0659	5.2979	5.9511	3.6785	0	3.4842	0
hsa-miR-142-3p		14.9744	13.9085	13.9364	13.7432		8.22281e-07	2.12776e-05		15.139	15.041	14.923	14.427	15.324	14.795	15.771	14.601	14.493	14.896	15.308	14.337	14.11	14.614	14.284	14.71	13.582	12.73	13.613	14.148	13.141	14.226	14.112	13.114	13.998	12.964	13.746	13.731	14.96	14.274	13.573	13.67	13.837	13.724	14.167	14.654	14.246	13.882	13.331	13.951
hsa-miR-142-5p		14.5219	14.7662	14.2746	14.76		0.00660234	0.0327507		14.565	14.425	14.343	14.581	14.226	14.728	14.709	14.713	14.574	14.552	14.325	14.519	14.774	15.201	14.482	15.88	14.539	14.626	14.547	14.795	14.88	14.657	14.56	14.849	14.418	14.743	13.871	13.647	13.958	14.487	13.866	14.503	14.488	14.103	14.879	14.476	14.283	13.601	14.806	14.769
hsa-miR-143-5p		4.78733	5.58611	5.05776	5.18908		0.0040743	0.022625		5.561	5.524	4.755	5.1768	4.9853	4.1393	4.0668	4.2949	4.8435	4.545	4.769	5.4034	5.494	4.8986	6.2302	6.1855	5.4665	5.1292	5.9135	5.9372	5.7028	5.7226	5.2279	5.0902	5.8039	5.0118	4.9838	6.0132	4.0152	4.449	4.8277	4.84	5.4931	4.959	5.3344	5.7082	5.4561	4.9207	4.6097	4.61
hsa-miR-144-3p		12.1319	12.9716	12.2085	12.1769		0.00184987	0.0126517		12.369	12.151	12.268	11.911	11.95	12.045	12.416	12.728	12.468	11.172	11.973	13.264	12.897	14.394	12.568	12.52	12.318	13.49	12.319	13.121	13.729	12.415	12.058	13.683	12.827	13.577	12.387	12.011	11.298	12.812	12.177	12.37	11.501	12.23	12.168	11.763	11.342	11.198	12.575	12.039
hsa-miR-144-5p		9.56529	11.2317	10.9943	9.68956		4.97631e-09	2.44913e-07		10.011	9.604	9.6053	9.2853	9.3966	9.3818	10.221	9.525	10.018	8.4792	9.691	11.66	11.233	12.915	11.275	11.355	9.9986	11.724	10.036	11.524	11.566	10.603	10.976	11.521	10.857	12.272	11.306	11.336	10.41	11.682	10.224	10.425	10.534	10.984	11.021	10.743	9.7885	8.7787	9.2195	9.5037
hsa-miR-145-5p		7.35618	8.92039	8.13038	7.14627		3.31449e-10	2.18931e-08		6.45	7.7585	7.0769	7.6362	6.8815	7.6357	7.5074	7.6168	7.6432	7.715	6.9968	9.3505	8.4782	8.7118	8.9189	10.211	9.2645	8.2886	9.2721	9.2469	8.4629	9.3053	8.4111	8.2814	8.6822	7.7123	8.5573	6.9815	7.4684	8.7456	7.8371	8.0307	8.265	8.2301	8.9253	8.6809	7.471	6.7417	5.7252	7.025
hsa-miR-148a-3p		13.4491	13.1552	13.4912	13.897		1.06716e-05	0.000180985		13.368	13.479	13.371	13.847	13.169	13.647	13.24	13.581	13.183	13.882	13.173	12.979	12.76	12.828	13.132	13.708	13.37	12.994	13.406	13.258	13.324	12.911	12.938	13.287	13.278	13.273	13.405	13.173	13.088	13.062	14.113	14.505	13.424	13.236	13.546	13.578	13.614	13.747	14.04	13.862
hsa-miR-149-3p		6.7503	5.80788	6.07796	5.92903		1.54037e-05	0.00025106		7.0915	6.6654	6.6984	7.0347	6.7461	6.7913	6.1421	6.6918	6.5643	6.6919	7.1358	5.9883	5.6892	5.6069	6.2677	4.6805	5.5921	6.278	5.5916	5.5355	5.7486	6.4145	6.0692	5.8838	5.9644	6.0118	6.278	7.0595	6.0986	5.5402	6.2236	5.5644	6.6959	5.959	5.8704	5.5562	6.3305	6.553	6.1946	6.1803
hsa-miR-149-5p		5.35378	4.19071	4.63515	4.0934		2.01914e-05	0.000314197		5.6135	5.2439	5.6395	5.1768	5.4004	5.3319	4.9599	5.2949	5.374	5.3815	5.4753	3.605	4.2434	3.8782	3.3973	3.2369	4.177	4.6931	4.7384	3.4436	5.5035	4.1096	4.3433	4.8838	4.4169	4.3989	4.1765	5.4438	3.7104	3.0954	5.2236	5.5644	4.3502	5.2585	5.0568	4.7082	3.8711	5.3357	3.9316	4.4725
hsa-miR-150-5p		11.9873	12.1461	11.1227	11.2351		0.00313266	0.0184858		11.776	12.094	11.391	12.735	12.07	12.476	12.001	12.111	11.504	11.929	11.773	10.674	12.295	13.409	11.911	13.933	12.938	13.427	12.953	11.457	11.783	11.967	10.405	11.725	11.168	11.261	11.054	10.231	12.329	11.797	10.921	11.271	11.358	10.648	10.946	10.534	10.978	11.71	10.661	12.872
hsa-miR-151a-3p		12.2001	11.6994	11.9194	12.2873		0.000152363	0.00160013		12.21	12.137	11.999	11.644	12.354	12.088	12.785	11.834	12.452	12.091	12.607	11.601	11.86	11.673	12.016	11.419	11.604	10.915	11.67	12.165	11.537	12.05	12.068	11.403	11.81	11.456	11.928	11.357	12.478	12.117	12.314	11.682	11.838	12.081	11.866	11.996	12.397	12.629	12.528	12.488
hsa-miR-151b/151a-5p		9.27136	8.31061	8.67157	8.07677		1.18911e-09	6.35034e-08		9.3569	9.3038	9.3213	8.925	9.3853	9.0358	9.9123	8.8637	9.097	9.2999	9.484	8.3341	8.5802	8.7362	8.4057	8.2813	8.0183	8.0022	8.0604	8.9998	7.6313	8.8925	8.1782	7.5232	8.7051	8.2539	8.6111	8.0365	9.2413	8.682	8.7547	8.8787	8.3236	8.718	9.0946	8.7929	7.9533	8.4104	7.8256	8.4725
hsa-miR-152-3p		9.08342	8.59916	8.5266	9.14763		2.09903e-05	0.000323226		9.3873	9.0439	9.3854	8.739	9.4411	8.8157	9.021	8.8879	9.1866	8.9226	9.0871	8.4235	8.3939	8.2226	9.366	8.5502	8.8959	8.0568	8.8422	8.4412	8.2405	9.008	9.3276	8.172	8.4478	7.9625	8.6522	8.2644	8.8517	8.715	8.9062	8.6384	8.5433	8.201	8.4719	8.586	9.4729	9.4189	9.6321	8.9876
hsa-miR-152-5p		5.14869	5.31098	5.44871	4.12917		4.67573e-06	9.16882e-05		5.45	5.137	5.8619	4.6362	5.4004	4.4194	4.7189	4.5579	5.4809	5.867	5.106	5.7538	5.1928	4.5818	5.6452	3.9506	5.5307	5.7553	5.3388	5.1264	5.9966	5.5768	5.1347	5.7683	5.0019	6.5012	6.3194	6.3965	5.6002	4.7328	5.3871	4.7088	5.6959	5.3878	4.5974	4.6087	5.0806	4.7142	3.8321	3.9579
hsa-miR-1537-3p		0.373273	3.17356	2.02275	0.8806		0.000363879	0.00330919		0	0	0	0	0	0	0	0	0	0	4.106	3.6664	2.7074	3.0708	3.4848	4.6374	3.4665	2.9275	3.6911	3.8395	4.7486	3.3441	0	0	4.8457	0	3.9134	4.9491	3.2079	2.2474	0	0	4.0131	0	3.9193	0	3.193	0	0	0
hsa-miR-155-5p		9.9832	9.34799	9.08758	9.77993		0.000699438	0.00571853		9.996	9.6239	9.6619	10.107	10.311	10.47	10.51	9.486	9.6393	9.7461	10.264	8.7871	9.4979	9.6216	10.192	10.652	9.6866	9.6622	9.7729	8.7881	8.5431	9.1694	8.7304	8.5927	9.1759	8.4458	9.1052	8.6646	9.8115	9.6986	9.0676	8.7677	9.255	8.6848	9.2604	9.2022	9.8048	10.551	8.5522	10.104
hsa-miR-15a-5p		10.9011	11.7841	11.8404	10.5565		1.51028e-06	3.61029e-05		11.007	11.046	11.087	10.503	10.589	10.983	11.043	11.441	10.961	10.668	10.584	11.382	12.054	12.955	11.229	12.718	11.663	12.491	11.498	12.213	11.224	11.183	11.399	11.491	11.477	13.146	11.928	12.084	10.944	12.172	11.465	12.104	11.627	11.629	11.6	11.545	9.9466	9.4526	11.871	10.671
hsa-miR-15b-3p		7.53996	8.80497	8.28258	7.8461		2.96402e-06	6.13621e-05		7.45	7.3791	7.4468	7.4247	7.4153	7.7242	7.8961	7.8392	7.9278	7.0952	7.3412	8.2362	8.6286	9.6752	7.8403	9.1733	8.911	9.1621	8.8476	8.4926	9.697	7.8739	8.4373	9.618	8.6765	9.6623	8.0713	8.4085	8.028	8.6014	7.3871	8.6293	7.66	8.5393	8.3656	7.7556	6.99	7.2135	8.6021	7.7847
hsa-miR-15b-5p		11.3717	12.2535	12.1536	11.1135		1.60549e-05	0.00025832		11.452	11.449	11.461	11.174	11.008	11.561	11.47	11.744	11.46	11.053	11.257	11.966	12.329	13.468	11.443	13.027	12.45	12.857	12.26	12.415	12.033	11.538	11.451	12.274	12.038	13.662	12.45	12.093	11.363	12.553	11.616	12.393	11.777	12.043	12.135	11.605	10.053	9.9796	11.961	11.442
hsa-miR-16-2-3p		12.5031	11.1889	11.5515	11.9636		3.90417e-06	7.77736e-05		12.191	12.665	12.802	12.309	12.525	12.532	12.482	12.906	12.266	12.245	12.611	10.858	11.118	11.513	11.161	10.53	10.979	11.715	10.691	11.883	11.483	11.37	10.686	11.596	11.062	13.583	11.452	11.494	10.447	11.251	10.998	12.28	11.033	11.972	11.576	10.98	11.123	11.368	12.799	12.18
hsa-miR-16-5p		19.8751	19.3419	19.4355	20.0816		0.00329661	0.0191539		19.746	19.942	19.931	19.75	19.697	20.061	19.932	20.282	19.887	19.47	19.928	18.875	19.341	19.981	19.176	19.357	19.022	19.874	18.903	19.902	19.754	18.993	18.625	19.848	19.135	20.977	19.526	19.142	18.509	19.351	19.559	20.02	18.84	19.675	19.346	18.846	19.268	19.435	21.287	20.109
hsa-miR-17-3p		1.82313	6.33477	6.12078	4.44578		5.57863e-10	3.37014e-08		0	3.7585	0	0	0	0	3.8445	4.2949	4.176	0	3.9805	5.636	4.94	6.831	5.8892	6.3875	6.5617	6.3198	6.6297	6.2937	7.4351	6.0222	5.9827	7.4871	6.2711	6.5968	6.2209	7.1901	5.8324	5.8912	5.2236	6.0444	6.257	6.5623	6.3162	5.1937	4.2634	0	5.1122	4.3205
hsa-miR-181a-2-3p		6.27919	7.34466	7.2635	6.43824		2.29024e-08	9.12459e-07		5.9761	6.5026	5.8619	6.603	6.2417	6.9318	6.8141	5.5173	6.7751	5.867	5.9805	6.7957	7.7735	7.4354	7.542	7.4228	8.182	7.1448	8.1107	6.7349	7.1062	7.212	6.9097	6.9382	7.5174	7.2539	7.285	7.4669	7.7104	7.5657	6.9017	6.7258	7.1998	7.3353	6.8453	7.6087	6.4103	6.2992	6.3466	6.7847
hsa-miR-181a-3p		5.70807	6.61099	6.68671	5.6062		1.31116e-06	3.16444e-05		6.0915	6.7941	5.4468	4.9841	5.339	6.0323	5.4689	5.4324	5.374	5.9471	5.8786	6.4651	7.0859	6.3111	6.4634	7.283	7.0732	6.7349	6.8395	5.825	6.034	7.3531	6.8717	5.4313	6.7826	5.7708	6.8676	7.0746	7.2739	7.065	6.8086	5.6019	7.6294	6.7663	6.2219	6.4738	6.119	5.5684	4.8321	5.7355
hsa-miR-181a-5p		9.66654	9.98949	10.2629	9.72419		0.00245831	0.0158214		9.6579	9.7897	9.7688	9.8278	9.4807	9.5822	9.7004	9.3653	9.2685	9.988	9.9026	9.9502	10.095	10.695	9.8801	10.996	10.204	9.8199	10.204	10.143	9.3336	10.211	9.1956	9.4217	9.7037	9.8621	10.286	10.224	10.829	10.675	10.464	9.4839	10.616	9.7504	10.265	10.436	9.5204	9.898	9.1514	9.8943
hsa-miR-181b-2-3p		0	1.45486	0.303127	0		0.00076038	0.00613683		0	0	0	0	0	0	0	0	0	0	0	2.4034	3.1928	2.3339	0	2.4999	3.4665	0	3.3692	0	0	0	3.1023	0	0	0	0	0	0	0	0	0	0	0	3.3344	0	0	0	0	0
hsa-miR-181b-3p		0.341682	3.63271	3.45237	0.958942		5.74861e-07	1.56837e-05		0	3.7585	0	0	0	0	0	0	0	0	0	3.1689	4.909	3.2725	2.9823	4.4999	4.0071	4.1292	3.9542	3.5176	4.8361	4.4145	3.6429	0	3.5238	4.5593	3.9134	4.3965	3.2079	0	4.0392	0	4.5201	4.5805	4.0999	4.6593	0	0	0	0
hsa-miR-181c-5p		1.99944	3.66535	4.53871	3.49565		0.00426082	0.0233508		0	0	4.3765	4.6362	4.1373	0	0	0	0	4.3227	4.5211	2.7819	4.8449	4.6315	3.9823	5.0193	4.0071	4.2495	4.1766	4.2832	0	4.9764	4.3978	0	3.9644	3.8964	4.5457	5.1335	4.7104	4.5402	4.4866	4.9014	4.4656	4.0659	4.9193	4.2608	4.3305	3.8212	3.4842	3.5656
hsa-miR-182-5p		10.5205	10.7037	10.2342	11.5597		0.00254634	0.016134		10.526	10.525	11.093	10.303	10.603	10.581	10.925	10.941	9.8895	9.4656	10.873	10.2	10.305	12.774	11.096	11.484	10.093	11.8	10.13	10.79	10.421	10.246	9.6429	10.407	10.463	11.709	9.8953	10.015	9.3728	10.772	9.7621	9.4864	10.38	10.124	10.924	10.136	10.271	10.548	10.975	11.215
hsa-miR-1827		6.45871	5.12389	5.15089	6.37914		3.53394e-10	2.25499e-08		6.6135	6.5451	6.9853	6.2642	6.1008	6.2861	6.2368	6.8637	5.9712	6.4101	6.769	4.8888	5.3162	5.1412	5.5471	4.3744	5.177	5.9094	4.9135	5.588	5.2081	5.1514	4.9648	4.8838	4.6707	5.9553	5.2639	5.1335	4.1465	5.0752	5.2802	5.6019	4.9746	5.8131	4.4048	5.0108	4.8253	6.0362	6.4677	6.7153
hsa-miR-183-3p		0.804727	4.10329	1.67914	2.2911		0.00013439	0.00144419		0	0	4.3765	0	0	0	0	4.4755	0	0	0	2.9883	3.2923	3.6069	3.2047	4.1166	4.3994	4.1906	4.1766	3.2832	5.6066	3.9291	4.5498	5.4313	4.6707	4.835	0	4.3965	0	0	0	0	4.8527	0	0	4.3863	3.5715	0	3.6097	3.1505
hsa-miR-185-3p		3.71667	5.31209	4.92818	5.00654		0.00108738	0.00827071		4.6135	4.0215	0	0	4.5158	4.5798	4.9033	3.7099	5.2585	4.4381	4.843	5.5892	5.6709	5.4768	5.1522	5.773	5.2166	5.278	5.1062	4.9236	5.3925	5.0222	5.2279	5.5757	4.9644	5.5968	4.801	5.297	4.8708	4.5693	4.6672	5.2233	5.257	3.959	5.2604	4.7082	5.041	4.968	4.7796	4.9918
hsa-miR-185-5p		11.7628	13.2454	12.9247	12.7131		3.16786e-07	9.69673e-06		11.951	11.623	11.785	11.347	11.518	11.872	11.974	12.056	12.451	11.112	11.702	13.334	13.369	13.426	13.275	12.958	12.975	13.114	12.983	13.264	14.234	12.049	13.346	14.28	12.828	14.06	12.779	12.434	12.502	13.246	12.666	13.435	12.49	12.895	12.855	12.81	12.493	12.254	13.612	12.886
hsa-miR-186-5p		9.58655	10.7823	10.4236	10.0824		8.36731e-08	2.87698e-06		9.8368	9.675	9.2591	9.5691	9.2583	9.8476	9.8482	9.8372	9.8468	8.8976	9.5763	10.525	10.843	11.389	10.871	11.356	10.443	11.075	10.474	10.708	11.057	10.385	10.357	11.026	10.443	11.67	10.343	9.807	10.239	10.411	10.308	10.736	9.955	10.469	10.561	10.161	9.5715	9.3038	10.533	10.234
hsa-miR-188-3p		5.62842	2.51557	3.08652	6.20941		3.40855e-11	2.75983e-09		5.8936	5.7585	5.3765	5.8206	5.9853	5.3763	5.3888	5.1429	4.9955	6.13	6.0446	3.1689	3.0859	2.3339	2.8567	3.0525	0	4.3605	3.5916	3.2832	0	3.4816	2.9648	0	3.0384	0	2.9134	4.297	3.2079	3.449	4.2802	3.6384	4.1575	3.959	0	4.0493	6.9479	5.8212	6.2726	6.3338
hsa-miR-188-5p		0	1.76352	0.513245	1.95069		0.00191313	0.0129309		0	0	0	0	0	0	0	0	0	0	0	2.9883	0	0	3.0978	3.1166	3.329	2.9275	3.3692	2.5176	0	0	3.3433	0	0	0	0	0	0	2.3849	0	0	0	0	0	3.2608	3.8711	0	3.6097	3.3729
hsa-miR-18a-3p		0	4.23291	3.90255	2.51368		6.27269e-10	3.6615e-08		0	0	0	0	0	0	0	0	0	0	0	4.4034	3.1928	5.2725	4.0412	4.2078	3.4665	4.5598	4.0322	3.4436	6.1749	3.6071	3.7304	6.0902	3.0384	5.3558	3.9838	0	4.2079	3.8796	3.9017	4.84	3.2246	4.718	4.7673	4.0493	3.5715	0	0	0
hsa-miR-18a-5p		7.17685	7.81361	7.18248	6.69176		0.000153069	0.00160085		7.1281	7.481	6.8094	6.6686	7.4593	7.3319	7.2929	7.2584	7.3924	6.7821	7.3412	7.5119	7.4782	8.8717	7.5822	7.6071	7.347	8.2092	7.3767	7.1499	8.8519	7.423	7.4438	8.8558	7.6822	8.6378	7.4557	5.8472	7.4431	7.5216	6.6241	7.4864	6.6356	6.9865	7.4387	6.9306	6.3789	6.4732	5.4842	6.7652
hsa-miR-1908-3p		5.2589	3.65574	4.54154	4.77361		0.00155548	0.011187		5.713	4.896	5.5781	5.6362	5.4593	4.5798	4.8445	4.973	5.8165	5.13	5.2215	4.0814	4.5949	3.2083	4.2553	3.5472	4.0071	5.0319	4.1062	3.8961	0	4.5457	5.1023	0	4.8039	4.0118	4.4984	6.1043	4.6229	4.0954	4.5797	4.3164	4.0131	4.6508	4.4048	4.6593	5.2287	5.2617	4.6097	4.8135
hsa-miR-1909-5p		5.36388	2.01306	3.41794	4.5644		4.15517e-05	0.00054892		7.8061	5.4366	4.514	5.2642	5.5158	3.6538	4.4294	4.5579	4.176	6.1971	7.4518	4.9394	4.7778	0	0	0	0	3.306	3.7842	3.003	0	4.4816	3.8908	0	0	0	4.5915	0	2.9448	3.0129	5.1033	4.5644	3.8527	4.959	4.1824	4.3863	5.2974	5.3357	4.9316	4.025
hsa-miR-190a-3p		0	2.252	1.0325	0.264042		0.00052819	0.00454027		0	0	0	0	0	0	0	0	0	0	0	2.7819	0	4.0343	0	3.2369	3.5921	3.5125	3.3692	3.8961	0	3.4816	0	0	3.6234	3.6333	0	0	0	0	0	0	3.7652	3.959	0	0	0	0	0	0
hsa-miR-190b		7.14543	6.88176	6.47704	7.15879		0.000648133	0.0053868		7.0541	6.9123	7.0318	7.5518	7.0249	7.3092	6.8888	7.0174	7.298	7.6684	6.843	6.8229	7.3627	6.5433	6.3631	7.7754	7.6582	6.639	7.5524	7.19	6.793	6.3441	5.8327	6.6428	6.825	6.6333	6.801	6.4896	6.4684	6.2201	7.0555	6.3388	6.5466	5.6508	6.6272	6.4161	6.4858	7.1635	7.2821	7.307
hsa-miR-191-5p		13.0445	13.9441	13.5673	13.8656		0.00156883	0.0112187		12.976	12.876	12.479	13.004	12.745	13.619	13.583	12.834	13.31	12.758	13.306	13.893	13.656	15.021	13.624	15.755	13.975	13.133	13.987	13.383	13.605	13.925	13.851	13.599	13.811	13.041	13.127	12.885	13.835	14.061	12.564	13.483	14.101	13.529	14.622	13.992	13.535	13.031	12.878	13.953
hsa-miR-193a-3p		0.438655	1.21402	0.748118	3.3272		0.000349862	0.00321668		0	0	0	0	0	0	0	0	0	4.8252	0	0	2.9704	0	0	2.6805	3.7076	3.6056	4.0322	0	0	0	0	0	0	0	0	4.1901	0	0	4.0392	0	0	0	0	0	4.4561	4.0138	0	3.9579
hsa-miR-193b-5p		5.50752	4.08533	5.05872	5.49577		0.00182939	0.0126147		5.2656	5.3908	5.6395	5.4987	5.8154	4.7913	5.1175	6.0319	6.0659	5.9856	4.9805	4.1258	4.4729	3.5038	4.6827	3.5931	4.5307	4.7755	4.4281	4.325	4.2081	4.3441	4.9648	0	5.24	4.1188	6.0178	4.9491	5.8897	4.48	6.7295	5.9014	4.2246	5.5439	3.5974	4.1937	5.515	7.2712	4.5483	5.6949
hsa-miR-195-5p		11.4205	11.6809	11.8583	12.323		0.00162441	0.0115261		11.228	11.648	11.612	11.181	11.399	11.403	11.411	11.789	11.32	11.184	11.45	11.225	11.628	11.782	11.654	10.922	11.628	12.121	11.305	12.103	12.369	11.657	11.184	12.564	11.391	13.462	11.803	11.905	10.686	11.57	12.166	12.492	11.17	12.186	11.791	11.21	11.51	11.725	13.257	12.523
hsa-miR-197-3p		9.17699	9.39446	8.88647	8.62903		2.86783e-05	0.000412972		9.1984	9.1881	8.9674	9.712	9.1991	9.1711	9.0343	9.0533	9.0801	9.3302	9.0129	9.27	9.204	9.7024	9.3931	10.391	9.32	8.4353	9.258	9.0799	9.3597	9.6732	9.4226	9.5757	9.4376	8.545	8.8723	8.8516	9.0152	8.805	8.7547	8.5691	9.4708	8.5017	9.2047	9.1611	8.7629	8.6577	7.7042	8.6317
hsa-miR-199a-5p		7.53376	6.88221	7.11021	6.56753		0.00188942	0.0128522		7.5066	7.3314	7.2043	7.4987	7.9343	7.2388	7.8293	7.486	7.4549	7.6566	7.7305	7.4168	7.1668	6.9968	8.023	6.4696	6.9379	6.3335	7.0697	7.4531	5.3925	7.44	6.6429	5.7683	7.24	6.0928	6.5573	6.4896	7.9448	7.0235	7.6566	6.8242	7.2809	7.5532	7.5123	7.2771	6.99	6.7687	6.3823	6.8875
hsa-miR-199b-5p		4.92779	7.05288	6.79135	6.69154		0.00109172	0.00827863		4.8061	5.2945	4.514	6.4247	0	6.2626	5.6858	5.4755	5.4809	5.4926	4.769	6.7957	7.7648	8.0412	7.0339	10.361	7.425	5.9454	7.5656	6.5532	5.0706	7.3709	7.2127	4.8838	6.7165	5.5593	5.9838	6.8819	5.7314	7.065	6.006	7.2233	7.6781	6.3246	8.8134	7.438	7.2974	5.2992	4.7252	6.8965
hsa-miR-19a-3p		8.74806	10.0694	10.3594	8.77667		1.8879e-07	6.29423e-06		8.834	8.6606	8.7824	8.3163	8.3311	8.9093	9.1813	9.1595	9.1109	8.5957	8.3476	9.3737	11.157	10.529	10.159	10.237	8.8898	10.259	8.9567	9.8476	10.419	10.119	11.027	10.395	9.6022	11.691	8.7639	9.747	8.8177	10.521	10.409	10.623	10.414	11.607	10.906	10.454	8.7568	7.6504	10.022	8.2798
hsa-miR-19b-3p		10.2502	11.3787	10.9991	10.337		6.20458e-06	0.000115359		10.357	10.334	10.06	9.9905	10.054	10.562	10.807	10.638	10.48	9.7684	9.701	10.776	11.284	12.279	10.77	12.1	10.936	11.455	10.93	11.543	12.152	10.894	11.273	12.173	10.737	12.137	10.603	10.607	10.263	11.363	10.436	11.476	10.611	11.01	11.397	11.087	10.153	9.1937	11.299	10.05
hsa-miR-203a-3p		8.09756	6.52766	7.14595	6.00413		5.34056e-09	2.52921e-07		8.9406	7.722	7.4468	9.3163	7.6609	7.1263	8.1112	9.1529	8.1493	7.9951	7.4518	6.2004	7.1602	5.6193	5.9365	5.6591	6.2359	6.8344	6.088	6.0412	7.0885	7.3972	7.1105	7.0902	6.9259	7.0118	8.0261	7.8384	6.2953	5.9141	7.3871	6.6563	7.1227	8.135	6.8704	7.3482	6.2805	6.5057	5.7252	6.2238
hsa-miR-203b-5p		6.24973	4.99474	5.33164	4.86952		6.36345e-05	0.000779135		7.0541	5.722	5.514	7.4056	5.8598	5.4194	6.1175	7.3187	6.0659	6.3227	5.9473	4.5409	5.4515	3.9188	5.012	3.5931	4.762	5.6717	5.0322	4.4436	5.3336	6.0666	5.6653	4.9907	5.4444	5.0663	5.9314	6.4896	4.5298	3.9254	5.7892	5.1744	5.3198	6.1165	4.9193	5.3863	5.2287	5.0138	4.0247	5.238
hsa-miR-2054		0.354173	1.89667	0.977445	2.71725		0.00521244	0.0274858		0	0	0	0	0	0	0	0	3.8959	0	0	3.2513	3.0859	2.7489	0	3.7223	3.329	0	3.4847	2.8961	0	0	4.0352	0	0	0	0	0	3.4303	0	0	0	0	0	3.8198	3.5018	3.6785	4.1837	4.1946	3.8135
hsa-miR-20a-5p		11.5991	12.2526	11.7618	11.2668		4.71547e-06	9.17506e-05		11.495	11.632	11.55	11.05	11.397	11.68	11.992	11.94	11.938	11.303	11.613	12.136	12.225	13.14	11.982	12.26	11.879	12.542	11.867	12.109	12.722	11.883	12.126	12.706	11.959	12.89	11.789	10.775	11.333	12.005	11.709	12.023	11.262	11.885	11.924	11.785	11.06	10.885	11.424	11.059
hsa-miR-20b-5p		8.6918	10.0424	9.47464	9.27399		3.41249e-06	6.90754e-05		8.991	8.5914	8.8683	8.0594	8.5365	8.8437	9.021	9.0426	9.0886	8.1214	8.4459	9.8579	9.9002	11.072	9.7282	10.179	9.7469	10.285	9.7297	9.9279	10.505	9.3463	10.258	10.469	9.5884	10.547	9.5281	9.2611	8.6397	9.865	9.1534	9.8939	8.3159	9.4825	9.872	9.6624	9.1261	8.5491	9.9745	9.4359
hsa-miR-2110		5.88805	6.57217	6.49403	6.66316		0.00190745	0.0129309		6.298	5.8289	6.4468	5.6362	4.6228	5.9169	5.9033	5.9116	6.1971	6.164	5.843	6.843	6.5352	6.4071	6.4085	6.8457	6.8651	6.2495	6.8286	6.825	7.0154	5.3797	6.3571	7.0902	6.3603	6.9979	6.5457	7.271	6.3644	6.2292	6.2802	6.5453	6.6959	5.931	6.0999	6.4738	6.4257	6.4401	7.4341	6.9665
hsa-miR-2114-5p		1.72253	4.21461	4.33574	2.5089		0.00885626	0.0408625		0	0	5.142	4.6362	5.1373	4.0323	0	0	0	0	0	3.0814	4.1928	2.7489	3.3973	3.6374	5.255	4.8151	5.1062	5.622	4.3336	5.9048	4.2867	0	6.6234	0	6.1151	6.8819	5.6002	2.6259	5.5339	4.9014	6.2246	6.2127	3.5974	0	4.515	0	0	4.9918
hsa-miR-2116-5p		0	0.221871	1.59213	0.260983		0.0056845	0.0292979		0	0	0	0	0	0	0	0	0	0	0	0	0	0	0	0	0	0	3.1062	0	0	0	0	0	0	0	0	4.4896	0	2.2474	0	0	3.6721	3.718	0	3.3863	0	0	0	0
hsa-miR-214-3p		2.77574	5.1854	4.68625	4.19486		0.000134638	0.00144419		4.5066	4.8289	0	0	0	3.6538	3.8445	4.7803	3.789	5.13	0	6.7468	5.0859	4.2083	6.4417	3.6805	5.177	5.1292	5.5391	5.3042	5.6066	4.7771	5.2279	5.4313	4.24	4.2183	5.1765	4.3965	4.0823	4.2474	4.5797	4.4864	4.7652	5.5065	4.9666	5.1233	3.778	5.1837	3.9316	4.025
hsa-miR-215-3p		0	0.952229	1.81291	0		0.0017794	0.0123345		0	0	0	0	0	0	0	0	0	0	0	0	0	0	3.7896	0	0	0	0	2.5176	0	3.6071	0	0	3.4169	0	3.1765	3.8116	0	2.5104	0	3.7759	3.0871	3.5805	0	0	0	0	0	0
hsa-miR-217		0.392973	2.18122	2.93538	2.11121		0.00998935	0.0450148		0	0	0	0	0	0	0	0	0	4.3227	0	0	0	0	0	2.915	0	4.065	3.5916	3.6551	4.4491	3.6071	3.7304	0	4.5238	0	2.9134	4.0746	4.0823	2.7328	0	3.6384	4.2246	3.5805	3.3344	3.7082	4.119	0	0	3.4725
hsa-miR-219a-1-3p		2.56669	1.71024	5.38686	3.77952		8.50669e-06	0.000149313		0	3.896	0	0	4.2748	3.7913	0	4.2949	3.6735	4.1971	4.106	2.4034	2.7074	0	2.8567	2.841	0	3.306	0	0	4.4491	5.3797	0	0	0	5.669	4.2354	6.512	4.4809	4.6803	5.6241	5.9312	5.0506	6.7663	5.1824	5.1233	4.7291	4.1013	4.417	4.3729
hsa-miR-219b-5p		0	2.39415	1.784	1.11159		0.00410513	0.0226958		0	0	0	0	0	0	0	0	0	0	0	2.5409	2.9704	2.6558	0	2.915	3.7076	3.306	3.5916	2.7807	4.3336	0	0	0	4.7165	0	3.7614	4.1901	0	0	4.2802	0	3.5725	0	3.8198	0	3.193	3.8212	0	0
hsa-miR-221-3p		11.3185	11.6914	11.9642	10.985		9.5405e-07	2.44354e-05		11.324	11.148	11.271	11.288	11.334	11.349	11.566	11.086	11.195	11.404	11.539	12.047	11.871	11.727	11.703	12.324	12.055	11.153	12.083	11.991	10.602	11.932	11.966	10.584	11.642	11.64	11.934	11.732	12.363	11.925	12.331	11.672	12.03	12.148	11.903	11.928	11.689	11.492	10.85	10.904
hsa-miR-222-3p		8.40832	8.65601	8.74737	7.84403		2.54531e-08	9.98238e-07		8.6005	8.2758	8.3306	8.306	8.4949	8.4663	8.7513	8.2584	8.0015	8.403	8.6032	9.0151	8.8873	8.7031	8.9189	9.0151	8.7885	8.8817	8.877	8.7426	7.7259	8.8133	8.4177	8.0162	8.3818	8.6601	9.1557	8.5449	9.4026	8.6903	8.9721	8.84	8.7453	8.2529	8.2979	8.6593	8.233	8.2474	7.7594	8.025
hsa-miR-223-5p		11.629	11.2207	10.8608	11.6898		0.00841025	0.0391646		11.417	11.596	11.474	12.062	11.398	12.067	11.559	11.249	11.625	12.12	11.352	11.235	11.268	10.879	10.897	12.743	11.816	10.508	11.618	11.304	10.475	11.73	10.825	10.661	11.131	9.4813	10.453	10.873	10.499	10.83	10.444	11.08	11.665	10.659	12.029	11.455	12.085	10.64	10.498	11.849
hsa-miR-22-3p		10.3629	11.2692	11.5053	10.7288		1.74818e-06	4.10088e-05		10.62	10.176	10.408	10.49	10.246	10.208	10.423	10.396	10.594	10.071	10.36	11.328	11.272	11.495	11.585	10.583	10.84	11.427	10.814	11.497	11.865	11.041	10.979	11.845	11.198	12.293	12.071	11.825	11.669	11.229	12.407	11.624	10.865	11.099	10.65	10.826	10.528	10.735	11.694	10.262
hsa-miR-224-5p		9.56774	7.64549	8.34251	9.23293		5.18177e-05	0.000660215		8.9199	10.411	9.9463	8.6766	9.2789	9.2508	10.276	8.5276	9.6996	10.445	9.8134	6.9394	7.5753	8.1196	7.9365	7.5931	7.3994	6.5363	7.3916	9.7665	6.1062	8.9793	6.8426	6.3533	9.4978	7.0118	9.986	6.8116	8.8826	9.3317	7.9461	7.9675	9.3217	8.5759	7.8004	8.1323	10.173	9.3757	7.0359	9.8417
hsa-miR-22-5p		4.91388	5.75591	6.07817	4.61806		7.09883e-12	6.36359e-10		5.3911	5.0215	5.0545	5.0837	4.9853	3.9169	4.5074	4.6359	5.0428	5.6446	4.769	5.6961	5.7605	5.5038	5.5871	5.5472	5.8898	5.6056	5.7384	5.5355	5.556	6.4316	6.1821	5.6428	5.9063	5.7377	6.4984	6.8472	6.1465	5.6803	6.2802	6.3608	5.5201	5.9024	5.8951	5.9912	4.5715	4.8212	5.154	4.2094
hsa-miR-2355-5p		0	2.79669	1.62977	0.624358		9.64999e-05	0.0011162		0	0	0	0	0	0	0	0	0	0	0	3.7253	4.1928	3.1412	3.3042	3.8785	0	3.413	3.4847	2.6551	0	4.4145	3.6429	0	3.3014	0	3.0509	0	0	3.7834	0	0	3.6721	0	3.9193	3.5018	0	0	0	2.8875
hsa-miR-23a-3p		12.443	12.9695	12.6036	12.2149		0.000168132	0.00171549		12.359	12.431	12.181	12.723	12.307	12.682	12.507	12.336	12.473	12.607	12.267	13.128	13.183	12.952	12.732	14.03	13.328	12.465	13.324	12.81	12.229	13.242	13.084	12.227	12.839	11.772	12.717	12.221	12.548	12.61	12.488	12.568	12.969	12.615	12.966	13.166	12.748	12.197	11.515	12.154
hsa-miR-23b-3p		10.297	10.7826	10.5595	10.0718		3.17668e-08	1.22669e-06		10.29	10.188	10.266	10.434	10.144	10.41	10.563	10.181	10.105	10.371	10.315	11.048	10.876	10.572	10.792	11.017	10.942	10.725	10.94	10.648	10.5	10.939	10.798	10.53	10.629	10.08	10.861	10.516	10.55	10.386	10.452	10.777	10.589	10.676	10.539	10.729	10.435	10.566	9.8094	9.9929
hsa-miR-23b-5p		1.99739	4.17854	3.67049	3.86765		0.00930992	0.0424649		4.8061	0	0	0	0	0	4.4294	4.7803	3.4105	4.545	0	3.3293	3.4729	3.5562	4.5672	3.6374	3.8145	4.4636	3.9542	4.4811	5.2081	4.666	4.5009	4.8838	3.9644	0	5.1151	0	5.0152	3.0954	4.9721	4.7759	4.0131	4.346	4.3344	4.7082	4.4561	5.1013	4.1122	3.8875
hsa-miR-23c		5.15433	6.36947	6.04669	5.04936		1.11031e-09	6.05845e-08		4.8936	5.5658	4.514	5.6362	5.339	5.2861	5.3039	4.5579	5.298	5.1971	5.106	6.4302	6.6709	5.6315	6.0555	6.6963	6.8898	6.1292	6.8395	6.1957	6.1062	6.8925	6.5618	6.0902	5.9833	4.9553	6.2062	6.1335	5.689	5.7068	6.1033	6.1991	6.2409	6.1893	6.37	6.7202	5.5435	4.8718	3.8321	5.025
hsa-miR-24-1-5p		0	1.66393	1.85835	0.487242		0.00575745	0.0295526		0	0	0	0	0	0	0	0	0	0	0	0	0	0	3.4848	2.763	3.914	0	3.3692	3.003	0	3.3441	0	0	3.4169	0	3.679	0	2.9448	2.7328	4.2802	0	3.0871	3.718	0	0	0	0	0	0
hsa-miR-24-2-5p		0	2.19544	2.36564	2.28993		0.00183689	0.0126298		0	0	0	0	0	0	0	0	0	0	0	3.4737	0	3.2725	0	3.0525	3.5921	3.306	3.4847	2.8961	0	0	4.0352	0	3.6234	0	3.2919	3.8116	4.2079	2.2474	0	0	4.5201	0	4.3344	3.6087	4.041	0	3.3466	0
hsa-miR-25-3p		13.2749	13.9637	13.8649	14.4341		6.2395e-05	0.000767703		13.136	13.303	13.017	13.279	12.811	13.823	13.452	13.588	13.746	12.694	13.175	13.797	13.674	14.896	13.221	14.603	13.891	14.554	13.961	13.899	14.302	13.271	13.543	14.194	13.686	15.17	14.252	13.469	13.16	14.223	13.243	14.207	13.629	13.773	13.884	13.504	13.793	13.509	15.187	14.42
hsa-miR-2681-3p		0.729455	2.60353	3.8032	0.317792		3.84977e-06	7.73034e-05		4.1281	0	0	0	0	0	0	0	3.8959	0	0	3.4737	0	2.7489	3.0978	3.6805	0	3.065	3.5916	3.5176	0	4.9291	3.3433	0	5.0019	3.7708	4.9134	5.3965	4.6673	2.6259	3.9017	0	4.5725	5.0134	3.4719	3.5018	0	0	0	3.8135
hsa-miR-26a-2-3p		8.53451	8.2294	8.90552	7.24557		1.30276e-10	9.08311e-09		8.3911	8.6313	8.4724	8.4152	8.577	8.2267	8.9319	8.4702	8.16	8.6861	8.9177	7.961	8.4488	8.8042	8.4085	8.4526	8.7486	8.065	7.6911	7.8646	7.378	8.7398	8.1023	8.2494	8.2977	9.8132	8.5688	8.2644	8.9936	8.9283	8.3676	8.5013	8.897	9.0101	9.3434	9.273	6.9586	6.9563	5.8827	7.7944
hsa-miR-26b-5p		14.8073	15.0341	14.314	14.7732		0.00255187	0.016134		14.809	14.822	14.478	14.353	14.843	14.939	15.388	14.947	14.668	14.572	15.061	14.934	15.082	16.146	15.023	16.201	14.802	15.096	14.816	14.744	14.5	15.093	14.444	14.457	15.139	14.835	14.344	13.495	14.584	14.56	13.833	13.998	14.342	14.061	14.817	14.585	14.519	14.458	13.629	15.062
hsa-miR-28-3p		9.07672	8.84125	8.61998	9.49824		0.000923866	0.00717927		8.9761	8.9123	8.9187	8.6197	8.8976	9.2478	9.4907	9.021	9.3577	9.2053	9.197	8.8463	9.0002	8.9717	9.5032	10.233	8.9671	7.9139	8.9937	8.982	7.793	8.9734	9.09	7.6591	8.8509	7.3775	8.7589	8.0595	9.1928	8.9099	8.4986	8.521	9.0506	8.1412	9.1443	9.1655	9.8398	9.7935	8.8608	9.6662
hsa-miR-2909		0.820664	1.07202	1.37384	3.12371		0.00744463	0.0359732		4.3911	0	0	4.6362	0	0	0	0	0	0	0	2.4034	0	0	2.9823	0	0	0	0	3.1026	0	3.3441	0	0	3.1759	0	3.9838	0	3.3233	0	0	0	4.2246	3.5805	0	0	3.5715	0	3.6097	3.5656
hsa-miR-296-5p		1.52704	5.1561	4.77133	3.66989		1.09454e-06	2.74729e-05		4.2656	0	4.3765	0	0	0	3.9599	4.1954	0	0	0	4.5077	5.7253	5.1583	4.6452	4.6374	5.5307	5.9979	5.4847	4.2832	5.9186	4.3441	5.3978	5.8838	4.6707	6.669	4.7614	4.9491	3.7104	4.449	6.0392	4.6384	4.2888	4.5805	4.0125	4.3863	3.778	0	4.9789	3.7355
hsa-miR-298		2.24455	0.643343	0.977655	3.67979		8.45093e-05	0.000991208		4.3911	3.7585	0	0	0	0	4.2595	3.8474	3.9955	4.4381	0	0	0	0	0	2.178	0	0	3.4847	0	0	3.3441	0	0	0	0	0	3.9491	0	0	0	0	3.2246	3.5805	0	0	4.5715	3.5988	4.2726	3.8875
hsa-miR-299-5p		4.72676	3.61901	4.90386	4.74167		0.00496286	0.0263915		4.8936	4.8289	4.9614	4.8772	4.9853	4.3319	3.8445	4.388	4.548	5.6446	4.691	4.4034	3.5554	3.8782	4.3973	4.2935	4.651	3.5125	4.6911	4.1499	0	3.9291	4.9648	0	4.24	4.3114	5.2639	6.271	4.0152	4.6259	5.5797	4.4864	4.9351	5.1165	4.536	4.8014	4.3947	4.9207	5.2342	4.775
hsa-miR-29a-3p		10.5005	11.3256	11.6852	10.5114		5.59247e-07	1.54254e-05		10.536	10.503	10.298	11.042	10.459	10.708	10.485	10.463	10.333	10.6	10.078	11.158	11.495	11.872	10.627	12.996	12.052	11.789	11.871	10.471	10.347	10.902	11.487	10.61	10.881	11.546	12.144	10.586	11.838	11.939	11.323	12.311	11.672	11.499	12.015	11.664	10.424	10.672	9.56	10.535
hsa-miR-29a-5p		0.338082	2.42882	2.71595	1.73009		0.00531271	0.0277233		0	0	0	0	0	0	3.7189	0	0	0	0	2.8888	3.1928	3.0708	2.8567	3.5472	0	3.6931	0	3.003	0	4.1921	3.4502	0	4.1088	0	0	4.0746	3.6229	3.3178	0	3.9014	3.9351	4.4285	3.3344	3.2608	3.9586	3.3357	0	0
hsa-miR-29b-1-5p		2.76685	5.17228	4.78185	5.65981		1.12028e-06	2.76946e-05		0	4.4366	0	0	0	4.7242	3.9599	4.388	4.176	4.6446	4.106	5.1475	5.3396	5.4213	4.8892	5.8598	5.255	6.1755	4.9135	4.325	4.4491	5.0666	5.3708	5.0902	5.1088	5.2656	4.1151	4.3965	4.5298	4.283	4.3871	5.3164	4.5201	5.5805	5.4048	4.8014	5.0004	5.3357	5.417	6.2094
hsa-miR-29b-2-5p		0.776727	2.5595	1.70894	3.5043		0.00249592	0.0159204		0	0	4.755	0	0	0	0	0	3.789	0	0	3.4034	3.3855	3.7933	2.8567	3.915	4.3994	3.065	3.6911	0	0	3.6071	0	0	3.7165	0	3.5915	4.297	0	2.9254	0	3.6384	0	4.346	0	0	3.5715	3.7142	3.9316	3.5656
hsa-miR-29c-3p		10.7023	11.1471	11.4934	10.6797		0.00131732	0.00969642		10.902	10.76	10.686	10.915	10.491	10.731	10.605	11.048	10.964	10.421	10.202	10.928	11.359	12.502	10.198	12.345	11.21	11.491	10.983	10.478	10.687	10.625	11.167	11.044	11.043	12.648	11.392	10.874	10.805	11.889	10.95	11.791	11.395	11.203	11.804	11.676	10.304	9.9116	11.697	10.875
hsa-miR-29c-5p		5.26208	5.95436	5.68567	4.64473		0.00230415	0.0150219		4.9761	5.1914	5.514	5.6362	4.8154	5.3319	5.7513	4.8474	4.6121	5.4381	5.769	5.8888	5.494	6.7823	6.0267	7.1008	6.1969	6.1906	6.1766	5.7807	5.6066	6.0666	5.3433	5.1833	5.5238	6.1188	5.7	5.8819	5.7104	5.9141	5.3871	6.0169	5.0131	5.5065	5.6849	5.6087	5.6785	4.968	5.3101	5.266
hsa-miR-302e		10.1384	7.77786	7.80293	8.88473		9.83498e-17	3.08572e-14		10.419	10.051	10.638	10.319	10.14	9.6057	9.6604	10.216	9.9985	10.521	9.9536	7.5892	7.8284	7.2001	7.7011	7.3278	8.1364	7.4321	8.2721	7.4903	8.1237	7.7016	8.4373	8.172	7.478	7.4913	7.7463	9.0708	7.747	6.7709	8.0716	6.84	8.1703	7.9932	7.699	8.2318	9.3057	8.9504	9.0526	8.6949
hsa-miR-3064-3p		0.371691	0.940914	1.75224	3.44318		0.000899133	0.00704017		0	0	0	0	0	0	0	0	4.0886	0	0	2.5409	0	0	0	0	0	0	0	3.3656	0	0	3.6429	0	3.6234	0	0	0	3.2079	0	4.5797	0	0	4.6508	3.3344	3.5018	3.193	5.6577	0	4.4236
hsa-miR-3064-5p		0.337264	2.64161	2.35424	3.35003		0.000238181	0.00229936		0	0	0	0	0	0	0	3.7099	0	0	0	2.7819	3.2923	3.6069	3.2047	3.5931	0	3.6056	3.4847	3.1026	0	3.9291	3.3433	0	3.0384	0	3.9134	0	3.0823	3.449	0	0	3.6721	3.718	4.0125	4.0493	4.041	4.2617	0	4.4725
hsa-miR-30a-3p		6.74612	6.02752	5.71654	6.29493		7.57347e-05	0.00090521		6.6888	6.646	7.0087	6.4987	7.0633	6.8238	6.946	6.2949	6.3554	6.9856	6.8961	5.439	6.4407	5.0708	6.8403	5.5119	6.4828	5.891	6.6669	5.5532	6.3634	6.1514	5.7304	5.7069	6.5366	5.4813	5.8583	5.7376	6.3233	6.1349	5.9373	5.5259	5.6232	5.0659	5.9666	5.2276	5.5435	6.553	4.9789	6.1803
hsa-miR-30b-5p		7.48198	7.91706	7.63421	6.91404		0.000177968	0.0018085		7.45	7.5555	7.4296	7.4247	7.6098	7.4508	8.2079	7.763	7.5724	6.9076	6.9305	7.4737	7.9285	9.4354	7.3281	9.4052	7.2359	7.6931	7.2272	7.5355	8.0433	7.9588	7.3844	8.1833	8.0065	7.8112	7.285	6.8647	7.9037	8.1446	7.2091	7.8787	7.5201	7.5805	8.2839	7.4948	6.4103	6.3176	6.1946	7.3138
hsa-miR-30c-5p		9.91112	10.2918	9.86503	9.29798		1.27564e-05	0.00021082		9.9457	10.113	9.4339	9.4942	9.9524	10.029	10.503	9.8698	10.05	9.7461	9.8852	10.074	9.8932	11.153	9.5559	11.637	10.231	10.472	10.216	9.8883	10.426	10.086	9.8302	10.464	10.159	10.33	9.987	9.2512	9.7853	10.317	9.0595	10.302	9.7567	9.4006	10.259	10.067	9.1402	8.5097	9.1566	9.6504
hsa-miR-3118		0	4.47891	4.43821	0.588825		3.05626e-13	4.03747e-11		0	0	0	0	0	0	0	0	0	0	0	4.9394	5.0579	3.9188	5.0412	3.8785	5.1364	5.065	4.4847	4.4436	4.556	5.6946	4.9648	0	5.5238	4.7708	4.6359	5.2445	5.7928	4.5979	3.9017	0	4.7652	5.468	4.7129	4.9306	0	0	0	0
hsa-miR-3124-5p		5.96151	4.82362	5.22547	5.56092		0.000132239	0.00143069		6.4208	6.1914	6.4121	5.7617	6.6228	4.7913	5.3888	6.2707	5.8435	5.7377	6.1358	4.7819	4.0293	3.7933	5.1252	4.0193	4.8145	4.5125	4.8717	5.003	5.5035	4.666	5.3433	5.8272	5.24	5.7708	5.3194	5.297	5.2079	3.9698	6.3611	4.7088	5.7652	5.346	4.2604	5.4738	5.4858	6.3888	5.8321	5.238
hsa-miR-3127-5p		0.420255	1.54411	1.79623	3.50266		0.00231556	0.0150572		0	0	0	0	4.6228	0	0	0	0	0	0	3.1689	3.5554	0	0	2.763	0	0	0	0	4.0706	0	0	4.8838	3.1759	0	0	5.2445	3.3233	2.5104	4.9721	0	0	0	0	3.7082	4.5715	4.968	5.2342	3.8135
hsa-miR-3129-5p		1.23448	4.74071	5.00958	2.15681		4.21502e-08	1.57906e-06		4.5066	0	0	4.9841	0	0	0	0	4.0886	0	0	5.0356	4.94	3.9968	5.0412	4.451	4.5307	4.3605	4.3692	4.622	4.6555	4.5457	5.7926	4.5053	5.5238	5.0118	4.9491	5.8472	5.5771	3.9698	5.2802	3.9014	5.1227	4.7821	4.7129	5.9511	3.3305	0	3.9316	3.3729
hsa-miR-3133		0	2.97711	2.20115	1.35938		0.000186055	0.00188306		0	0	0	0	0	0	0	0	0	0	0	2.6664	3.0859	2.4493	0	2.4999	3.7076	0	4.1766	3.1957	4.9186	3.7226	3.4502	4.5053	3.3014	0	3.4984	4.8819	3.7928	0	0	0	4.3502	4.4285	0	3.2608	0	0	3.3466	3.1505
hsa-miR-3135b		8.16865	7.05698	7.61679	6.96902		8.16761e-05	0.000962475		8.0635	8.0439	8.1098	7.8633	8.5569	7.4299	8.4979	8.2522	7.9712	8.6506	8.4159	6.6739	7.525	7.8015	7.5266	7.4354	6.607	5.7755	6.4707	7.8857	5.8779	7.8863	7.7409	5.9382	7.6531	5.9553	7.4307	7.6495	8.6536	7.9589	7.238	7.0307	7.9698	7.7261	8.0946	8.0775	7.6913	8.1787	6.8576	6.5314
hsa-miR-3138		5.43823	4.56124	5.22684	5.41369		0.00120029	0.00891338		5.8936	4.9601	6.5464	5.8206	5.6228	3.9169	5.7513	4.7803	5.5148	5.4926	5.5211	4.8628	3.7778	3.3927	4.7896	4.7428	4.651	3.1906	4.9135	5.1957	5.141	4.5457	5.5255	4.5053	4.6234	4.3989	5.2919	5.8116	5.3508	4.8323	6.1647	4.0169	5.5981	5.468	5.4387	5.1233	5.5715	6.1837	5.3466	5.0574
hsa-miR-3145-3p		0.403464	0.678593	2.27955	3.10182		0.000501349	0.00435428		0	0	0	0	0	0	0	0	0	4.4381	0	0	0	2.7489	3.6452	0	0	0	3.1062	0	0	0	0	0	0	0	3.4984	3.8116	3.3233	0	4.0392	0	3.2246	3.5805	3.5974	0	0	3.7142	0	6.3338
hsa-miR-3150b-5p		0.333955	2.83134	2.45708	2.03417		0.0040106	0.0224201		0	0	0	0	0	0	0	0	3.6735	0	0	3.9394	2.8449	3.0708	2.9823	3.763	4.0071	3.6931	4.3078	0	0	3.7226	3.8908	0	3.4169	4.0118	3.679	4.7376	4.3778	3.0954	3.9017	0	3.2246	0	0	0	4.119	3.4732	3.4842	3.5656
hsa-miR-3152-5p		2.88903	3.24796	4.14027	5.66599		0.000208156	0.00206304		0	4.0215	5.2244	0	4.4004	4.2388	0	0	3.548	5.7377	4.6085	3.4737	0	2.2083	2.7192	2.5931	4.7076	4.306	3.5916	3.4436	4.6555	4.5457	4.3433	4.8838	0	4.6333	3.7614	5.4438	3.6229	2.7328	4.8277	4.84	3.0871	4.0659	4.4048	4.1233	5.9372	5.8212	5.5483	5.6949
hsa-miR-3157-5p		0	2.60718	1.29684	0.945533		0.00184164	0.0126298		0	0	0	0	0	0	0	0	0	0	0	2.8888	2.7074	3.7031	0	2.9854	3.8145	3.9275	0	2.8961	4.9186	0	3.8908	4.7683	0	0	3.1765	0	0	0	4.6672	0	3.0871	0	3.3344	0	0	0	0	3.8135
hsa-miR-3158-3p		1.13355	2.70638	3.66353	2.57603		0.0071543	0.0347336		0	4.0215	0	0	0	0	0	3.7099	0	4.7377	0	2.7819	3.4729	4.2725	3.3042	2.178	3.4665	4.306	4.0322	3.3656	0	3.4816	3.2279	0	0	5.2183	4.2354	4.0746	0	3.3849	3.9017	4.4864	3.2246	3.959	4.0125	3.8014	3.6785	3.3357	0	2.8875
hsa-miR-3161		0	2.58279	2.00194	1.35483		0.00130759	0.00965311		0	0	0	0	0	0	0	0	0	0	0	2.6664	3.7074	2.0708	2.7192	1.915	3.8145	0	4.1766	3.003	4.8361	4.0222	3.2279	0	0	0	0	4.297	3.7928	2.5104	3.9017	0	0	3.718	0	3.8014	3.6785	0	0	3.025
hsa-miR-3163		0	0.788129	0.619073	2.51897		0.000411534	0.00362359		0	0	0	0	0	0	0	0	0	0	0	2.7819	0	3.1412	0	2.5931	0	0	0	2.5176	0	0	0	0	0	3.6333	3.1765	0	0	0	0	0	0	0	0	0	0	0	0	3.266
hsa-miR-3168		8.31094	8.10931	6.82457	5.49303		0.00294007	0.0178124		5.1984	8.4973	9.2591	10.638	9.2163	7.6718	8.0539	5.0884	10.702	9.9593	7.1358	10.367	8.6262	7.7118	9.4512	4.915	8.4123	9.5065	8.4777	8.1701	6.9966	7.917	8.1467	6.9113	7.921	12.879	10.273	6.0746	4.9804	8.5104	5.1647	5.1744	7.2246	4.4285	4.4719	5.8888	9.8935	6.968	6.0908	5.1202
hsa-miR-3169		3.74139	3.59935	4.04121	0.287167		4.54872e-07	1.28284e-05		4.5066	4.9601	5.142	5.3467	0	3.7913	4.2595	0	3.8959	4.8252	4.428	3.605	3.7074	3.8364	4.5672	3.2935	4.651	3.9275	4.6911	4.1499	0	4.666	4.4502	0	4.8457	4.3989	4.8394	5.3965	4.5771	3.8796	5.9721	0	4.2246	3.8435	3.7129	3.6087	0	0	0	0
hsa-miR-3183		1.05719	3.14076	4.05035	3.42813		0.00114676	0.00864372		0	3.7585	0	0	0	0	0	0	3.6735	4.1971	0	3.8363	2.9704	0	0	3.4999	4.4665	3.7755	4.8717	3.5176	4.4491	4.9764	3.6429	0	3.9644	0	4.679	5.5771	3.2079	3.0129	4.3871	4.4039	4.5201	5.4285	4.536	4.8014	4.119	4.2617	3.3466	4.0891
hsa-miR-3185		5.99997	4.58931	4.21456	4.5175		9.87539e-05	0.00112669		6.1637	5.722	6.264	6.6362	5.7696	5.8555	5.6518	5.5579	5.4809	6.5191	6.379	4.4034	3.8449	3.1412	4.9209	3.2369	4.9613	4.7755	5.0697	4.1957	5.8361	5.3797	5.3708	4.6428	4.4714	4.7708	4.8769	5.6991	4.4303	3.6803	4.9017	0	4.6232	5.0134	3.9193	4.4452	5.041	5.0138	5.0247	4.025
hsa-miR-3186-3p		0.403464	0.3726	2.38999	1.22523		0.00872411	0.0404013		0	0	0	0	0	0	0	0	0	4.4381	0	0	0	0	0	1.915	0	0	0	0	0	0	0	0	3.3014	3.6333	3.1765	4.6596	0	0	4.1647	0	3.6721	0	3.5974	3.3863	3.8711	0	0	3.3729
hsa-miR-3188		0.361182	2.34791	2.14459	0.679267		0.0078208	0.037249		0	0	0	0	0	0	0	3.973	0	0	0	2.8888	0	0	2.8567	0	3.329	4.1292	4.0322	3.003	0	4.0222	4.5009	0	4.1088	0	3.1765	0	3.7928	2.2474	0	0	3.9351	3.8435	3.3344	3.2608	0	0	0	0
hsa-miR-320a		11.8825	12.668	12.912	12.1892		2.58836e-07	8.22377e-06		11.773	11.794	12.141	11.788	11.718	12.069	11.589	12.091	12.086	11.943	11.716	12.722	12.454	12.565	12.908	12.184	12.995	12.524	12.934	13.205	12.899	12.312	12.4	12.889	12.361	13.119	12.893	13.813	13.145	12.709	13.38	12.605	12.858	12.705	12.222	12.583	12.303	12.629	12.838	11.709
hsa-miR-320b		10.1704	10.5341	10.9779	10.3786		0.00150587	0.0109241		9.991	10.057	10.686	10.508	10.341	9.9411	9.7533	10.29	10.09	10.356	9.8609	11.01	10.406	9.9113	10.666	9.3421	10.871	10.302	10.854	10.853	10.968	10.494	10.475	10.953	10.372	10.621	10.895	12.034	11.187	10.499	11.496	11.346	10.717	11.153	10.254	10.555	10.649	11.571	10.465	9.8773
hsa-miR-324-3p		4.33818	5.36317	5.40007	4.86735		0.00929041	0.0424649		4.8936	4.137	4.755	4.6362	5.2748	4.9169	5.0144	0	4.548	4.4381	5.106	5.5409	5.2681	5.8986	4.2047	5.8219	5.3994	5.628	5.3078	5.5355	5.7028	4.5457	6.1023	5.5053	4.6234	6.5209	5.2919	4.6596	5.5055	5.283	5.6672	5.8083	5.2888	5.5065	4.8198	5.0493	4.626	4.1837	4.6097	4.6949
hsa-miR-325		3.68166	2.47615	2.41139	0.92515		0.00714276	0.0347336		5.1984	3.896	0	4.8772	4.9853	3.6538	0	4.1954	4.2585	4.8252	4.6085	3.7253	0	2.8364	0	2.5931	3.8145	3.413	3.6911	3.1957	0	3.3441	4.1665	0	3.8864	0	3.5915	4.297	3.7104	0	4.3871	0	3.5725	3.5805	0	3.3863	4.119	4.2617	0	0
hsa-miR-326		6.10463	6.62787	6.35299	5.64638		0.000136266	0.00145543		6.1281	5.722	6.3765	6.2212	6.0249	6.2626	6.6518	5.3422	6.6121	5.3815	6.428	7.1899	6.494	7.025	5.7896	7.5356	6.607	5.0319	6.75	6.4718	6.53	7.0774	6.919	6.5757	6.7933	5.3114	6.0509	6.3476	6.7828	6.7134	6.4624	5.7088	6.8527	6.1654	6.7673	6.7202	6.1379	5.5988	5.3823	5.4482
hsa-miR-335-3p		6.54675	5.87602	5.72224	5.52983		0.00292942	0.0178035		6.561	6.8116	6.3399	6.1768	7.0052	6.2626	7.0924	6.4104	5.8959	6.545	6.9134	6.718	6.1269	5.3488	6.3973	5.3875	5.3647	5.4636	5.7384	6.4436	5.8779	6.8035	6.2576	4.6428	5.6937	4.4813	5.8394	5.6189	6.5298	6.0752	5.3871	5.7088	6.2246	4.5805	6.2219	6.2771	6.6655	5.7417	5.0691	5.7554
hsa-miR-337-3p		0	1.66553	2.16704	0.516192		0.00472131	0.0254302		0	0	0	0	0	0	0	0	0	0	0	3.9883	2.8449	2.0708	0	0	0	0	3.5916	3.6551	0	0	3.6429	0	3.5238	0	0	0	3.3233	3.6259	4.0392	4.3164	4.5201	0	4.0125	0	0	3.4732	0	0
hsa-miR-337-5p		5.62584	4.58201	5.84659	3.49272		0.00405198	0.0225509		5.3911	6.2945	6.264	5.0837	6.698	5.2388	5.2595	6.4755	4.2585	5.4926	5.428	6.6739	4.7778	4.3035	5.0412	4.5703	5.255	6.1906	5.2105	5.9099	0	5.1921	5.4243	0	5.5991	4.5593	5.1151	5.9815	5.9083	6.5979	5.4866	6.7427	6.955	5.1654	6.6418	5.1589	5.2634	4.1837	5.1122	3.9579
hsa-miR-338-3p		7.14076	7.84641	7.10401	7.10402		0.00280773	0.0173155		6.8061	7.2945	7.5303	7.4056	6.8378	7.2145	7.1902	7.0745	7.4284	7.545	6.2215	7.7644	7.7948	7.9608	8.5058	10.232	7.347	7.932	7.2841	7.8214	7.2878	7.941	7.3433	7.1375	7.4978	5.8964	6.9752	7.1621	7.2003	7.1103	7.1945	7.1109	6.9251	7.2127	7.8004	7.5562	7.272	7.1635	6.1122	7.6793
hsa-miR-339-3p		6.40093	7.36591	7.55481	6.41796		1.62274e-08	7.02256e-07		7.3607	6.0804	6.7269	5.1768	6.2748	6.3763	6.2819	6.7974	6.7033	5.8252	6.8065	6.4477	7.6095	7.6162	7.2615	7.4665	7.577	6.9893	7.4353	7.1146	8.2564	6.9994	7.6029	8.0413	6.7051	8.5306	7.3989	7.8733	7.5238	7.3517	7.2236	7.259	7.3502	7.8659	7.37	7.3559	6.2974	6.3537	6.6541	5.975
hsa-miR-339-5p		7.36845	7.98174	7.7943	6.67307		1.62193e-07	5.50142e-06		7.7719	7.3069	6.4468	7.0097	7.2417	8.0868	7.953	6.8637	7.789	7.2295	7.3539	7.7853	8.3367	8.5659	7.7147	8.9003	8.2068	6.65	8.2189	7.5707	7.9775	8.3259	8.0048	7.5757	7.9112	7.4611	7.0913	7.899	8.2918	8.1325	7.1189	7.5549	7.8841	7.9239	8.2121	8.1677	7.119	6.2426	6.4341	6.7254
hsa-miR-340-3p		4.91623	4.7902	4.72737	3.27362		4.94505e-05	0.000633269		5.1281	4.6845	5.3765	5.4247	4.7223	4.4194	5.5449	4.4755	4.3365	5.1971	4.769	4.1689	4.2434	5.0527	5.0697	4.915	4.651	4.9979	5.0322	5.1026	4.3336	5.1514	4.7722	5.2708	4.3014	4.835	4.9134	4.1901	4.8324	4.5979	5.2236	4.7759	4.5201	4.8435	4.1824	5.0868	3.5715	3.4732	3.3466	4.5198
hsa-miR-340-5p		9.92271	9.53274	9.38296	10.1047		0.000490105	0.0042714		10.108	9.8029	9.5383	9.5605	9.8405	9.8515	10.382	9.8978	10.206	9.9593	10.003	9.4123	9.8673	9.7089	9.795	10.618	9.1569	9.0793	9.2701	9.8996	8.743	10.132	9.3381	8.618	9.8198	9.0895	9.2062	8.5231	9.5403	9.6559	9.2836	9.2851	9.5033	9.4582	9.7024	9.965	10.449	9.8419	9.5045	10.096
hsa-miR-342-3p		12.413	11.9311	11.4114	12.5		0.000107574	0.0012054		11.919	12.433	11.866	12.599	12.589	13.054	12.238	12.233	12.667	12.614	12.331	11.337	12.112	12.399	11.907	13.252	12.491	12.535	12.489	10.973	11.308	11.749	11.031	11.28	12.172	11.081	11.296	10.3	12.212	12.343	10.573	11.816	11.705	11.403	11.46	11.336	12.474	12.53	11.332	13.132
hsa-miR-342-5p		4.31912	5.01908	4.24641	2.71833		0.00225691	0.0147522		5.0541	4.8289	4.6395	5.1768	5.4004	4.0323	4.4294	4.2949	4.548	0	5.106	4.3293	5.3855	4.3927	5.1787	5.8504	5.2166	5.3335	4.9135	4.5532	5.141	5.2701	4.6429	4.8838	5.1759	3.6333	5.1765	4.297	5.1775	4.5402	0	4.3164	5.5725	4.8435	4.7673	4.3863	3.9586	4.0138	0	4.266
hsa-miR-345-3p		0.876164	3.37105	3.70603	0.89125		2.74344e-05	0.000398566		0	0	4.3765	0	0	0	0	0	0	5.2613	0	3.8363	3.1928	3.0708	2.9823	3.7223	4.0946	4.9275	3.8717	0	4.9186	4.7226	3.8908	0	3.9644	4.1188	4.3464	5.1901	4.4303	2.3849	4.6672	0	4.1575	3.5805	3.9193	3.9713	3.5715	0	0	0
hsa-miR-345-5p		5.49765	7.00645	6.69495	5.80105		1.29118e-12	1.40907e-10		5.2656	4.8289	5.5781	5.7003	5.5158	5.7913	5.6518	5.6734	5.6121	5.6919	5.1649	6.6739	7.0789	7.7347	6.6827	8.3496	7.2359	7.0319	7.2021	7.1146	6.7028	6.362	6.6653	6.798	6.4579	6.866	6.7104	6.6596	7.0152	6.6119	6.5105	6.3388	6.4376	6.8732	6.8198	6.8014	5.599	5.0582	5.451	6.266
hsa-miR-34a-5p		6.6021	7.56871	8.01641	7.56943		0.00443688	0.0241574		6.3297	6.7585	5.8619	6.7313	6.8598	6.1899	7.202	7.2828	7.1971	5.6446	6.5655	7.5852	7.7948	6.8833	8.971	7.3579	7.1969	9.0171	7.1766	7.4903	6.3634	6.9764	8.4373	6.7379	7.9739	8.1188	9.7065	6.0442	9.0823	8.0954	9.1496	9.3051	6.9149	7.3353	7.1924	7.236	8.6525	9.0933	6.417	6.599
hsa-miR-34c-5p		1.05118	2.70144	3.98225	3.49387		0.000842589	0.0066716		0	0	0	4.4987	0	3.6538	0	0	3.4105	0	0	0	3.3855	3.3339	3.9823	3.1166	4.0946	0	3.6911	3.7193	0	4.1096	3.8128	0	4.5744	0	3.679	5.0132	3.7104	2.3849	5.0392	4.0169	6.4376	4.0659	4.3344	5.1233	3.8711	3.8212	4.6097	4.5656
hsa-miR-3611		1.02059	4.01674	1.55422	2.02117		9.70324e-05	0.00111721		0	0	0	0	0	0	0	3.973	3.4105	0	3.843	4.2107	3.3855	3.2725	3.6452	3.5472	4.0071	3.065	3.6911	3.9506	5.556	5.3076	2.9648	5.2708	4.3603	0	3.1765	3.9491	3.8708	3.0129	0	0	3.0871	0	0	0	3.193	0	3.7252	3.7355
hsa-miR-3613-5p		9.29833	10.4864	9.43407	9.44632		2.44438e-06	5.42956e-05		9.4786	9.1474	9.189	8.8702	9.1553	9.4508	9.6016	9.9368	9.8814	8.732	8.8385	10.456	10.896	10.388	10.642	10.357	10.11	10.876	10.188	10.718	11.096	9.941	9.8729	10.992	10.276	10.705	10.471	9.7541	9.1736	9.8127	9.1496	9.5995	8.8123	8.6679	8.5516	9.0775	9.0854	8.6862	10.837	9.1297
hsa-miR-3615		7.72288	8.65643	8.66287	8.45283		3.2292e-05	0.000452809		7.3139	7.9042	7.755	8.2429	7.0633	8.7455	7.2819	8.0533	7.6508	7.6919	7.249	9.0744	8.4782	8.739	7.8152	9.4833	8.8015	8.9002	8.8449	8.5554	8.8676	8.3885	8.3708	8.6428	8.2282	9.3338	8.437	8.8161	8.3303	8.8248	8.4439	9.0512	8.6959	8.4384	8.4429	8.4773	8.54	8.2992	8.7007	8.1468
hsa-miR-3616-3p		4.10964	0.42825	0	4.34545		2.14194e-11	1.79209e-09		4.9761	3.7585	6.264	5.4987	0	0	4.6518	5.2949	4.9955	5.4381	4.3284	2.4034	0	0	0	0	3.5921	0	0	0	0	0	0	0	0	0	0	0	0	0	0	0	0	0	0	0	5.041	4.7687	5.154	4.9579
hsa-miR-3618		0	0.605457	0.338	2.68167		6.50666e-06	0.00011921		0	0	0	0	0	0	0	0	0	0	0	0	3.3855	0	0	1.915	0	0	0	0	0	0	0	0	3.1759	0	0	0	0	0	0	0	0	3.718	0	0	3.4561	3.3357	0	3.1505
hsa-miR-3621		0	0.844279	2.28706	1.67115		0.00369205	0.0209662		0	0	0	0	0	0	0	0	0	0	0	2.6664	0	0	2.7192	0	0	3.1906	3.2437	0	0	0	0	0	0	0	3.8394	3.9491	3.4303	2.7328	0	4.1238	0	3.5805	0	3.5018	0	4.1013	0	3.5656
hsa-miR-362-3p		0	2.22622	2.07855	0.311292		0.000154222	0.00160621		0	0	0	0	0	0	0	0	0	0	0	2.6664	3.2923	2.6558	0	2.6805	0	3.6931	3.1062	2.5176	0	4.4145	3.1023	0	3.0384	4.3989	0	0	3.4303	3.0954	3.9017	0	0	0	3.7129	4.3249	0	0	0	3.7355
hsa-miR-362-5p		3.18345	3.66291	4.47748	1.77487		0.00248353	0.0159204		0	3.896	5.3025	4.4987	4.1373	0	3.7189	3.973	4.9466	4.545	0	4.2107	4.2434	4.9968	3.6452	4.5703	4.0946	5.0975	4.3692	3.1026	0	4.8295	4.5971	0	3.5238	4.3989	4.3464	4.3965	4.0823	4.7068	4.9017	4.2233	4.2888	4.4285	4.8198	4.6593	3.4561	0	0	3.7355
hsa-miR-363-3p		8.74205	9.64811	9.62294	9.20008		0.00115907	0.0087104		8.834	8.508	8.6839	8.8772	8.4375	9.1263	8.9105	8.9842	8.707	8.2375	8.8565	9.2261	9.1928	11.15	9.3602	9.5458	9.1415	10.243	9.221	10.091	10.122	9.1228	9.2335	10.06	9.3639	10.873	9.8757	9.9263	8.9583	9.9996	9.5965	9.9126	8.7482	9.3165	9.4801	9.1655	8.7229	8.2522	10.25	9.3905
hsa-miR-3648		1.11379	2.32583	5.17719	3.37016		4.65012e-07	1.29687e-05		4.5066	0	0	0	0	0	0	0	3.548	4.1971	0	3.6664	3.1928	2.2083	0	2.2935	3.4665	4.1906	3.2437	2.6551	0	0	3.3433	0	4.3014	5.3558	4.5457	6.4669	4.9083	3.7834	5.0392	5.4864	4.8527	6.4874	5.2219	4.8014	4.041	3.8212	0	3.266
hsa-miR-3656		6.02945	4.78284	5.33123	5.3637		8.78763e-06	0.000152117		6.0915	6.0215	6.8359	6.4987	6.1008	6.3543	5.2137	5.3422	5.9955	6.2613	5.6085	5.3852	5.1134	4.9387	4.6068	3.9506	4.5921	5.0975	4.4847	4.8104	4.2081	4.5457	5.1975	5.1833	4.8457	6.1694	4.679	6.297	5.6453	5.1153	6.2236	4.7759	5.257	5.1654	4.6563	4.6593	5.515	5.4061	6.154	4.4236
hsa-miR-3665		0	1.20213	2.44143	0.84585		0.00149165	0.0108523		0	0	0	0	0	0	0	0	0	0	0	2.5409	3.0859	2.0708	3.3042	2.0525	0	3.7755	0	0	0	0	0	0	0	3.6333	3.1765	0	3.4303	2.3849	3.9017	0	3.3502	3.718	0	3.2608	0	0	0	3.025
hsa-miR-3669		0	4.37429	5.00395	0		1.82691e-21	1.14638e-18		0	0	0	0	0	0	0	0	0	0	0	4.8888	5.2923	3.9968	4.7549	3.6374	4.4665	5.1292	3.9542	3.6551	4.556	6.0666	5.3708	0	5.4714	4.3114	4.6359	5.1901	5.689	4.3178	5.3871	4.7088	5.5201	5.8732	4.1824	5.2276	0	0	0	0
hsa-miR-3670		0	0	1.28172	0		0.00119491	0.00891338		0	0	0	0	0	0	0	0	0	0	0	0	0	0	0	0	0	0	0	0	0	0	0	0	0	0	2.9134	4.1901	3.5298	0	0	0	3.4656	0	0	0	0	0	0	0
hsa-miR-3674		7.42868	8.40514	8.48877	7.19372		2.0415e-08	8.54027e-07		7.7603	7.4589	7.8619	7.6525	7.6228	6.6718	7.001	7.3422	7.327	7.9569	7.0602	8.5409	8.4835	7.3999	8.4607	7.5089	8.6795	8.2203	8.5884	7.6995	8.8255	8.9321	9.2316	8.6911	8.41	7.8192	8.5044	9.3194	8.4963	7.7865	8.8744	7.8003	9.3426	8.33	8.3162	8.7872	7.7291	7.4567	7.002	6.7944
hsa-miR-3679-3p		0	4.83529	4.75784	0.587558		5.4239e-21	2.7228e-18		0	0	0	0	0	0	0	0	0	0	0	4.6961	5.0579	4.2407	4.6452	4.5931	4.651	5.065	4.3078	3.8961	4.9186	5.2316	5.1347	5.4313	5.825	4.3114	4.9838	5.3476	5.7314	4.5402	3.9017	3.9014	5.4931	5.346	3.3344	5.4452	0	0	0	0
hsa-miR-3681-3p		0.387782	3.39349	1.94068	2.12005		0.0011283	0.00853023		4.2656	0	0	0	0	0	0	0	0	0	0	2.6664	3.3855	2.2083	4.0978	3.2935	4.329	0	4.4281	3.3656	4.6555	3.9291	2.9648	4.7683	3.4169	0	0	4.3965	0	2.3849	3.9017	3.6384	3.7652	0	0	3.2608	0	0	0	3.8135
hsa-miR-3682-5p		0	0.544743	0.3303	2.6073		3.98449e-05	0.000534817		0	0	0	0	0	0	0	0	0	0	0	0	0	2.2083	0	2.0525	0	0	0	3.3656	0	0	0	0	0	3.6333	0	0	0	0	0	0	0	0	0	0	3.193	0	3.6097	4.266
hsa-miR-3688-3p		4.73399	3.00976	2.16335	4.82134		5.38279e-05	0.000682363		5.6135	3.7585	6.4808	4.8772	4.8154	3.7913	4.6518	4.5579	4.4809	4.4381	4.6085	4.605	3.0859	3.9968	4.0412	3.1166	0	4.5598	0	4.1499	4.556	3.3441	3.6429	0	3.0384	4.7037	3.4984	0	0	3.2474	0	4.4039	0	3.8435	4.0999	0	5.193	4.8212	5.154	4.9918
hsa-miR-3692-5p		1.97805	4.57301	4.98757	5.11143		9.91574e-07	2.51399e-05		4.6135	3.896	4.514	0	0	0	4.2595	4.4755	0	0	0	5.1258	2.8449	5.0343	3.7192	5.1008	5.0071	4.306	4.8286	3.003	5.141	3.7226	5.8523	5.5757	4.7609	4.4813	4.801	6.0132	5.8897	4.2474	4.7497	3.6384	5.9149	5.0659	5.0125	5.0493	6.0004	5.6577	5.2726	5.266
hsa-miR-369-5p		7.35013	4.7591	5.87697	5.70453		0.000613531	0.00511616		8.0445	7.6939	7.6839	6.7003	7.6609	6.8397	6.7831	8.6072	6.133	7.2769	7.428	7.087	5.5147	3.9583	5.873	5.7428	5.499	3.5125	5.7842	6.0783	0	5.666	5.9097	0	6.0019	5.0118	5.9314	5.4438	5.0152	6.7583	6.7696	6.9889	7.273	4.0659	6.8326	4.5562	5.3947	5.7687	6.2145	5.0574
hsa-miR-372-3p		3.71741	0.209107	0.354673	4.60562		3.53972e-13	4.23081e-11		4.6135	0	5.6984	0	4.4004	3.7913	4.347	3.7099	4.4105	4.6446	5.2759	0	0	0	0	0	0	2.9275	0	0	0	0	0	0	0	0	0	0	0	0	0	3.9014	0	0	0	0	4.041	5.4732	4.5483	4.851
hsa-miR-373-3p		0	0.401914	1.88878	0.252083		0.00644077	0.0322038		0	0	0	0	0	0	0	0	0	0	0	2.5409	3.0859	0	0	0	0	0	0	0	0	0	0	0	0	0	0	3.9491	0	0	0	6.425	3.0871	3.8435	3.4719	0	0	0	0	3.025
hsa-miR-374a-5p		9.96616	10.7024	10.1217	9.6232		4.02579e-05	0.000537486		10.326	10.139	9.796	9.5862	10.068	9.7455	10.54	9.9194	9.8879	9.4588	10.161	10.87	11.11	11.8	10.862	10.88	9.7248	10.845	9.6986	10.237	10.849	10.616	10.651	10.73	10.96	10.505	9.9945	8.7328	10.144	10.714	9.6377	10.194	9.9599	10.189	10.953	10.315	9.3223	9.4834	8.1694	9.3154
hsa-miR-376a-3p		5.84716	4.33694	5.23255	3.29023		0.00358849	0.0204243		5.8061	6.137	5.6984	5.4247	6.4301	6.2861	5.4294	6.6359	5.2179	5.8252	5.428	6.6739	5.0859	4.1412	5.5471	5.3612	3.5921	3.065	4.4281	5.9372	0	5.0222	6.1023	0	5.7609	3.7708	4.8394	5.1901	4.4809	6.1054	5.9017	6.425	6.7077	4.6508	6.0999	3.3863	4.041	0	5.1946	2.8875
hsa-miR-377-3p		2.88484	2.53469	3.75624	0		0.000104725	0.00117874		5.3297	3.7585	4.9614	0	4.6228	0	4.1664	4.6359	4.2585	0	0	5.636	0	2.9188	4.6827	2.4999	0	0	3.1062	5.2832	0	3.8295	4.2279	0	3.3014	3.8964	3.9838	0	4.2079	4.5402	5.709	5.0169	5.1227	0	4.8704	3.9713	0	0	0	0
hsa-miR-378a-3p		7.69162	8.6836	8.97074	8.42656		1.15436e-12	1.31701e-10		7.3453	7.6654	7.8094	7.4987	7.4448	7.9018	7.5814	7.9116	8.0311	7.9665	7.4518	8.3898	8.8992	8.5754	8.8485	8.7605	9.0651	8.4479	9.2105	8.3929	8.9385	8.0666	8.668	8.8768	8.4307	9.1506	9.1326	8.775	8.7024	9.1875	9.4158	9.2648	8.4198	9.0851	8.8453	8.6992	8.6785	8.0472	8.7112	8.0127
hsa-miR-378a-5p		3.00278	5.19261	5.07691	4.61218		1.97639e-05	0.000310097		4.1281	0	0	0	4.5158	4.1393	3.7189	4.0884	3.789	4.3227	4.3284	5.2312	5.0293	5.4071	5.3746	5.6591	4.5307	5.306	4.8717	4.9771	6.3634	3.8295	5.0004	6.2708	4.8457	5.835	5.4495	5.534	4.5298	4.7068	4.9017	5.4457	4.0871	5.3029	5.2979	4.7556	4.9586	3.7142	4.9789	4.3729
hsa-miR-378b		0.392973	3.16451	2.48126	1.11667		0.000405016	0.00357955		0	0	0	0	0	0	0	0	0	4.3227	0	3.5409	4.0293	3.8782	3.6452	3.4004	3.8145	4.1906	4.1766	4.3656	4.3336	0	4.9283	0	0	0	2.9134	4.6596	3.4303	2.3849	0	3.7759	3.6721	0	3.3344	3.1233	3.193	0	3.3466	0
hsa-miR-378c		5.72025	7.09785	7.32101	6.63693		5.69024e-15	1.00513e-12		5.1984	5.7941	6.2244	6.131	5.5703	5.7913	5.7513	5.8799	5.761	5.4926	5.3284	6.5971	7.4353	7.1326	7.597	7.3875	7.4747	6.639	7.6608	7.0599	7.2081	6.7226	6.8523	7.0162	6.5868	7.2887	7.5457	7.3723	7.1227	7.4213	7.709	7.3825	7.032	7.0267	7.3612	7.269	7.289	5.8964	6.8951	6.4482
hsa-miR-378d		1.61121	4.91222	5.66033	4.52876		5.63927e-10	3.37014e-08		0	0	0	0	0	3.6538	4.5814	0	4.8435	4.6446	0	4.5409	4.743	4.4213	4.8567	4.2078	5.84	4.8151	5.0697	4.7503	5.556	4.666	4.5971	5.9907	4.7165	5.6333	6.1765	5.7376	5.1775	5.5548	6.2236	5.9014	4.9746	6.1412	5.6563	5.0868	5.1565	4.1013	4.7252	4.5198
hsa-miR-378e		0.387782	2.72966	2.47862	1.76027		0.00713511	0.0347336		4.2656	0	0	0	0	0	0	0	0	0	0	3.1689	2.9704	2.8364	3.5672	3.178	4.0071	3.306	4.3692	3.6551	0	4.1921	2.9648	0	0	0	3.9134	0	4.0152	3.6259	0	4.1238	0	4.1654	3.7129	3.7082	3.6785	0	0	0
hsa-miR-378g		1.3923	3.0007	3.14943	3.61622		0.00823787	0.0386422		4.1281	0	0	0	0	0	4.0668	3.7099	3.4105	0	0	3.4737	3.0859	3.1412	3.5672	3.1166	4.177	3.065	3.9542	2.7807	0	3.8295	4.6429	0	3.1759	4.0118	3.2919	4.297	3.6229	3.2474	0	3.7759	4.0131	0	4.3344	4.0493	4.3947	4.1837	3.7252	3.1505
hsa-miR-378h		0.349364	2.62231	3.19024	2.6997		0.000317119	0.00293716		0	0	0	0	0	0	0	0	0	0	3.843	3.1689	2.8449	2.8364	2.9823	2.178	0	0	3.6911	2.6551	4.3336	3.9291	3.4502	4.6428	0	0	0	4.3965	3.8708	3.5104	4.2802	4.1238	3.8527	3.8435	3.7129	3.5018	3.4561	0	3.6097	2.8875
hsa-miR-378i		1.89045	4.4592	4.87399	4.17978		8.34402e-06	0.000147523		0	0	0	0	0	0	3.9599	3.973	4.3365	4.1971	4.3284	4.2513	4.3396	4.3339	5.012	4.6374	5.177	5.1602	5.5391	4.5532	0	4.7226	5.1023	5.1833	4.4169	5.1694	5.0834	5.534	4.7928	4.3517	4.4866	5.1238	4.5201	5.346	4.8198	4.3863	4.8711	4.4061	4.3466	3.3729
hsa-miR-379-5p		8.82041	6.48621	7.19287	7.06798		2.52977e-06	5.4739e-05		8.6263	9.4196	9.6948	8.3366	9.335	8.7328	8.6816	9.3596	7.6277	8.8566	8.3539	8.2055	6.5654	5.7376	7.3917	7.0401	7.0295	5.0319	7.0604	7.731	4.4491	6.0445	7.1186	4.5053	6.8964	5.5968	6.9134	7.7564	7.1148	8.1662	7.4377	8.0099	8.5433	5.5805	7.8262	6.1764	7.2974	6.6137	7.8827	6.1505
hsa-miR-381-3p		6.22148	4.25731	5.52022	5.13324		0.00620702	0.0313473		6.0541	6.7764	6.5781	5.8206	6.7461	6.6357	6.2819	6.5579	5.2179	6.2923	5.4753	6.4034	5.3855	4.2407	5.7192	4.4259	3.329	4.1292	3.7842	6.2937	0	3.6071	6.3011	0	5.9833	4.4813	4.5457	4.7376	5.2953	6.3092	5.9373	6.871	6.4376	4.5065	6.8453	4.7556	5.363	5.1837	6.154	4.1505
hsa-miR-382-5p		10.3701	8.16021	9.16068	8.83178		0.000160742	0.00166034		11.075	10.477	10.833	9.6606	10.754	9.9037	9.723	11.705	9.0399	10.232	10.668	9.8562	8.2863	7.0843	9.0591	8.7081	9.3132	6.5943	9.4227	9.5653	5.556	7.8359	8.9558	5.4313	8.5744	7.3001	8.6304	9.7376	9.3216	9.6986	9.9062	10.145	10.624	7.6679	9.8262	7.9099	8.8935	8.6613	10.137	8.0614
hsa-miR-384		0	1.69716	0.315055	0		0.00308338	0.0184084		0	0	0	0	0	0	0	0	0	0	0	0	0	0	0	2.841	0	6.0485	3.5916	3.2832	0	4.1921	0	0	3.8039	0	0	0	0	0	0	0	3.4656	0	0	0	0	0	0	0
hsa-miR-3923		1.10558	2.16864	2.75552	3.66085		0.0076478	0.0366335		4.1281	3.896	0	0	4.1373	0	0	0	0	0	0	2.7819	4.1403	2.0708	0	2.9854	0	3.6056	0	3.7807	0	3.8295	3.4502	0	3.7165	0	2.9134	5.4438	3.7104	0	4.0392	0	3.7652	3.5805	3.4719	3.3863	3.5715	0	3.8321	4.9579
hsa-miR-3928-3p		0	3.87367	3.63185	4.01361		4.08115e-18	1.70728e-15		0	0	0	0	0	0	0	0	0	0	0	4.2513	2.8449	3.2083	3.9823	3.915	3.5921	3.6931	4.1766	3.7807	4.0706	3.8295	4.3433	4.5053	4.0384	0	3.5915	4.8116	3.7104	3.449	4.9017	3.6384	4.0871	3.5805	3.9193	4.2608	3.8711	4.7142	3.4842	4.1505
hsa-miR-3928-5p		0.361864	1.90725	1.33514	2.97612		0.00338875	0.0196438		0	0	0	0	0	0	0	0	0	0	3.9805	2.9883	0	2.9968	2.7192	4.7428	3.5921	3.7755	3.3692	2.5176	0	0	0	0	0	0	3.679	3.9491	0	0	0	0	3.0871	0	0	3.9713	4.119	0	0	4.025
hsa-miR-3934-3p		1.58631	3.29004	2.8859	0.8745		0.00638615	0.0321227		0	3.896	5.0545	0	0	0	0	3.7099	4.789	0	0	3.1689	3.5554	2.5562	3.0978	2.841	4.5307	4.6056	4.6911	4.003	0	4.5457	3.8908	0	4.5744	3.6333	4.2354	5.0746	4.4303	2.5104	0	0	4.0131	3.959	0	3.8888	0	3.9207	0	0
hsa-miR-3936		0.322545	0.910886	2.09555	0		0.00403408	0.0225012		0	0	0	0	0	0	0	0	3.548	0	0	2.4034	0	0	0	0	0	0	0	3.003	0	3.7226	0	0	3.6234	0	3.679	4.3965	0	0	4.1647	0	3.4656	3.959	0	3.3863	0	0	0	0
hsa-miR-3943		4.302	1.48176	1.71826	4.03185		2.90241e-05	0.000413924		4.713	4.6065	5.3765	0	4.9853	3.7913	4.0668	4.973	4.3365	5.4926	4.9805	3.3293	2.9704	0	3.2047	2.4999	0	4.5125	0	0	0	0	4.2279	0	0	0	3.1765	4.5771	3.7104	0	0	0	3.4656	0	0	3.9713	5.0806	3.8212	3.4842	4.775
hsa-miR-3960		4.71214	3.10543	4.58137	4.52764		0.0013792	0.0100927		4.9761	4.2439	4.6395	4.7617	5.2077	3.9169	3.9599	4.9116	5.548	4.8252	4.843	4.5077	4.4729	2.5562	5.012	2.6805	3.5921	4.413	3.2437	3.6551	0	4.4145	4.9283	0	0	4.5593	4.801	4.5771	4.1465	3.6259	5.6241	4.9603	4.6721	4.8435	4.536	4.0493	5.119	4.4061	5.4842	4.025
hsa-miR-3974		5.76787	5.55121	5.81695	4.9518		0.007457	0.0359732		6.0156	5.7585	6.4468	6.8772	5.8154	5.4194	4.6518	5.3422	5.0886	6.4656	5.5655	5.6513	5.7948	4.9387	5.8236	4.4004	5.499	5.413	5.3388	5.5355	5.9581	5.9994	5.6873	5.9382	5.7388	5.7708	6.2497	6.5557	5.9083	4.9478	6.1647	4.6384	6.1915	6.3029	5.5974	5.6593	5.8253	4.8718	4.3466	4.9231
hsa-miR-409-3p		9.86963	7.54518	7.99515	8.37688		3.29501e-05	0.000459471		10.415	10.242	10.412	8.8841	10.221	9.6982	9.4369	11.081	8.8131	9.5515	9.8111	9.2184	7.4023	6.6618	8.2738	8.376	8.2503	5.8724	8.0926	8.6895	5.556	7.423	8.421	5.0902	8.3052	5.5209	7.8676	8.3538	7.8028	8.9547	8.8789	9.0747	9.4	6.0914	9.1131	6.8888	8.4141	8.0691	9.2317	7.7102
hsa-miR-411-5p		7.44814	4.33694	5.93485	5.82453		3.86545e-05	0.000521628		7.376	8.231	8.4382	6.6686	7.9239	7.0461	7.4194	7.9272	5.9466	7.7035	7.249	6.9641	4.4298	4.3035	5.9051	5.451	4.0946	2.9275	4.3078	6.5444	0	4.7771	5.7722	0	5.24	3.6333	5.6576	6.1335	6.2668	7.0392	5.9373	6.4864	7.3121	4.959	7.0568	4.8014	6.2805	4.1837	6.6097	5.3469
hsa-miR-421		7.66542	8.27771	7.61108	8.55025		1.12544e-06	2.76946e-05		7.5743	7.8203	7.4975	7.2212	7.3073	7.6982	7.8293	8.0815	8.1971	7.7264	7.3665	8.2286	8.2403	8.4666	7.8567	9.1911	7.8273	8.3403	7.8449	8.1382	8.8882	7.8166	7.8475	8.8558	8.3458	8.2829	7.5745	7.3225	7.3371	7.6084	7.4624	7.9747	7.579	7.5894	7.2413	7.7497	8.367	7.7349	9.3147	8.3338
hsa-miR-423-3p		8.69971	9.17517	9.19028	8.66207		3.81168e-05	0.000519963		8.713	8.6115	8.4639	8.603	8.7041	8.7707	8.9942	8.3936	8.6432	8.6861	9.1135	9.2737	9.2152	9.5603	9.0768	10.077	9.0071	8.4667	9.0155	8.9013	9.158	9.0936	9.4389	9.066	9.1023	9.1284	9.0854	8.6343	9.8944	9.48	9.2522	8.8123	9.3964	9.0399	9.1443	9.2255	9.0107	8.9416	8.5444	8.7405
hsa-miR-423-5p		14.3024	13.2768	13.8485	14.2556		4.45575e-08	1.62086e-06		14.19	14.1	14.777	14.237	14.106	14.331	14.402	14.285	14.326	14.279	14.293	13.078	13.222	13.038	13.086	12.83	13.813	12.987	13.671	13.784	13.524	12.857	12.923	13.749	13.313	14.72	13.76	14.527	13.475	13.601	14.117	14.07	13.594	13.56	13.528	13.381	14.139	14.362	15.306	13.846
hsa-miR-4253		0	2.27139	1.90039	1.1669		0.00641193	0.0321586		0	0	0	0	0	0	0	0	0	0	0	3.4034	0	0	3.0978	2.178	4.0071	3.8535	3.8717	0	0	3.4816	3.7304	0	4.1759	0	0	4.1901	2.9448	2.3849	4.0392	0	0	3.8435	0	3.5018	3.6785	3.9207	0	0
hsa-miR-425-3p		7.62218	8.24014	8.07354	8.10816		0.000371578	0.0033549		8.0253	7.5346	7.5623	7.131	7.0633	8.1198	7.6432	7.5679	7.9278	7.5579	7.7109	8.1689	8.2681	8.6115	8.0943	9.3396	8.3778	7.7553	8.4245	8.147	8.2244	8.1359	8.1347	8.0035	7.6765	8.317	7.7	7.4554	8.4238	8.1004	7.9634	7.9531	8.0916	8.1774	8.2556	8.3712	7.8426	7.4976	8.5716	8.0931
hsa-miR-4268		1.07883	4.13989	4.33191	2.45999		1.18024e-05	0.000198819		4.1281	3.896	0	0	0	0	0	0	0	0	3.843	2.6664	3.8449	3.7489	3.0978	3.8025	4.9613	3.8535	4.8286	3.4436	4.9186	4.9764	4.5498	4.6428	4.6234	0	5.0509	6.3965	4.3233	3.9698	4.9721	4.9014	5.1915	4.5805	3.8198	4.4452	3.778	0	3.9316	3.8875
hsa-miR-4288		0.501273	1.07481	0	2.3633		0.00618486	0.0312984		0	0	5.514	0	0	0	0	0	0	0	0	0	0	2.4493	0	2.4004	0	5.9275	0	0	0	4.2701	0	0	0	0	0	0	0	0	0	0	0	0	0	0	4.2634	3.7142	0	3.266
hsa-miR-4293		4.99244	3.49419	4.55809	4.74107		0.00314437	0.0184858		5.3911	5.2945	5.5781	5.7617	4.8154	4.2388	4.4294	5.388	5.0886	4.3227	4.6085	4.5409	3.7778	2.3339	3.9823	3.4004	4.3994	4.1906	4.9542	3.9506	0	4.8295	4.4502	0	4.1088	4.1188	4.0509	5.4896	4.3233	3.449	5.3346	4.3164	4.9746	4.5065	4.9666	4.6087	4.119	5.4401	5.1946	5.1803
hsa-miR-4298		0.707891	3.33088	4.00854	2.51777		0.00040462	0.00357955		0	0	0	0	0	3.7913	0	0	3.9955	0	0	3.8363	3.0859	2.5562	3.7192	3.4004	4.9613	3.6931	4.9937	3.7807	0	4.5457	4.6429	0	3.4169	4.1188	4.1151	6.0746	4.0152	3.3178	4.2802	0	4.409	4.5065	4.5974	4.6593	4.8711	0	4.417	3.8875
hsa-miR-4306		3.65781	6.09661	5.71216	5.96459		6.64718e-07	1.787e-05		4.1281	4.4366	4.755	0	0	4.2388	4.4294	5.0319	5.176	4.1971	3.843	6.3852	6.072	5.5691	6.0838	4.9329	5.8145	6.0485	5.9937	6.0412	7.6435	5.4484	6.4373	7.0162	5.8662	6.2887	5.4244	6.0442	4.8708	5.8081	5.9373	6.3164	5.3502	5.7504	5.6272	5.4161	5.6785	5.6862	6.4677	5.9579
hsa-miR-431-5p		7.78639	5.63359	7.16478	6.28087		0.00963364	0.0437259		6.8722	8.2113	8.5937	7.2212	8.5019	7.9244	7.4883	8.2522	6.6735	8.2613	7.6503	8.0033	5.494	5.2246	6.9051	6.5472	7.167	5.0319	7.3311	7.4625	0	5.9994	6.9003	0	6.8039	5.3558	6.7	6.8819	7.2668	8.2496	7.9976	8.7759	8.7453	4.8435	8.3875	5.6087	6.704	5.4401	6.9316	5.4482
hsa-miR-4317		0	4.89135	4.60929	4.56075		4.13403e-29	5.18821e-26		0	0	0	0	0	0	0	0	0	0	0	5.5077	5.4298	4.7489	4.0978	4.8785	4.762	4.8151	5.399	4.325	4.9186	5.4145	4.9648	4.6428	4.5744	3.6333	5.0509	5.534	4.7104	4.2108	5.0392	3.6384	5.0871	4.7821	4.2604	4.7556	4.8711	4.8212	3.7252	4.61
hsa-miR-4318		0	6.266	6.52818	0		5.55182e-32	1.39351e-28		0	0	0	0	0	0	0	0	0	0	0	6.3293	6.2923	4.4493	6.5672	4.321	7.1261	6.6168	6.5656	5.588	6.793	7.1096	6.709	7.1141	6.1427	6.0118	6.9578	7.2039	7.1227	6.6465	6.1945	4.7088	8.0644	6.5065	6.0999	6.2932	0	0	0	0
hsa-miR-4325		3.39499	4.68306	5.02106	5.29325		0.00175606	0.0122436		4.2656	5.0804	4.6395	0	0	4.9169	4.1664	4.9116	4.2585	0	5.106	4.4737	3.9704	5.0343	3.9209	4.321	4.762	5.4882	4.4281	4.5532	4.9966	4.6071	4.7722	5.2708	4.9644	6.0393	5.0178	5.6991	3.9448	5.1153	4.0392	5.6384	4.9746	4.8435	5.2604	4.6593	4.515	4.4732	5.6097	5.7355
hsa-miR-432-5p		10.3461	7.89837	8.83196	8.79633		0.000412887	0.00362359		9.5875	11.003	11.198	10.122	11.009	10.547	9.9495	10.857	9.1787	10.308	10.047	9.767	7.7474	6.7031	8.7875	8.2459	9.2598	6.9094	9.2761	9.6694	4.3336	7.4568	9.1387	4.5053	8.7772	6.3989	8.271	9.3935	8.6173	10.068	9.6566	9.3852	10.839	6.8732	9.971	7.6779	8.8962	8.5256	9.9991	7.8602
hsa-miR-4328		0	2.36986	2.26989	0		1.83305e-06	4.26014e-05		0	0	0	0	0	0	0	0	0	0	0	3.1689	3.0859	2.0708	3.2047	2.9854	3.914	0	3.2437	3.1957	0	4.3441	3.9648	0	0	0	3.3989	0	0	2.5104	4.2802	3.7759	3.5725	3.718	3.7129	0	0	0	0	0
hsa-miR-4433b-5p		8.68808	7.70039	7.96203	6.98157		0.00613839	0.031126		8.6263	9.0983	8.6544	7.8633	8.8098	8.2919	8.7831	8.3992	8.9403	9.046	9.0563	7.2513	8.797	7.9632	8.4715	7.944	8.2832	6.7755	8.2355	9.3454	4.6555	8.526	7.9283	4.9907	8.6383	6.1694	8.9491	7.3225	7.0238	8.5438	8.2871	7.4763	7.8096	8.7504	8.6742	8.5761	8.3057	9.3537	5.8827	8.1163
hsa-miR-4435		0	1.81381	0.304564	1.92027		0.00217932	0.0143572		0	0	0	0	0	0	0	0	0	0	0	2.5409	2.9704	2.4493	3.3973	0	0	3.5125	0	3.003	0	3.4816	0	0	4.0384	0	0	0	0	0	0	0	3.3502	0	0	0	3.9586	0	0	0
hsa-miR-4440		6.65927	2.56843	3.04671	5.77494		3.05001e-09	1.5311e-07		7.3607	7.0948	6.7824	6.9581	6.2748	6.6173	5.9874	6.8799	5.9215	6.9471	6.428	3.7819	3.0859	2.8364	3.5672	3.8025	3.5921	4.5598	3.8717	2.8961	0	0	0	0	3.9644	3.6333	4.1151	5.9159	3.5298	3.0954	0	4.1238	4.0871	5.0134	0	0	5.8484	6.4061	5.8827	5.8875
hsa-miR-4443		3.64652	2.97622	4.46184	4.88648		0.00524758	0.0275553		4.8061	4.524	0	4.7617	4.2748	0	4.0668	3.7099	5.5804	4.545	3.843	3.9883	2.8449	2.9968	2.7192	4.0849	4.4665	4.3605	4.7842	0	0	3.6071	4.3978	0	3.4169	3.6333	4.8769	5.6596	4.7522	3.1734	4.3871	4.1238	5.2246	4.6508	4.4048	4.1937	5.5715	4.2617	5.8321	4.266
hsa-miR-4446-3p		4.03063	1.73342	2.11829	4.41668		0.000401627	0.00357955		5.1281	0	5.3765	0	5.1373	4.1393	4.7189	4.1954	5.2585	4.9076	5.4753	3.0814	4.4729	2.6558	0	3.3479	0	0	0	2.7807	0	0	3.8908	0	4.0384	0	3.7614	0	4.2668	3.3178	4.1647	0	3.4656	0	0	4.3249	4.4561	5.4401	4.3466	4.0891
hsa-miR-4451		5.29817	2.89272	4.0457	4.74964		5.94815e-06	0.000113105		5.8061	5.137	5.514	6.131	5.2748	4.7242	5.0668	4.5579	4.9955	5.6446	5.428	2.9883	3.909	2.0708	3.3042	2.841	4.177	0	4.0322	3.588	0	5.514	4.0352	0	4.0384	3.7708	4.5915	4.6596	3.9448	2.5104	4.0392	4.0169	5.0131	4.6508	3.5974	3.7082	5.0806	5.2233	5.154	4.4236
hsa-miR-4454		5.20884	6.9393	6.93248	5.45982		9.35554e-11	6.90659e-09		5.3911	5.3434	4.8619	5.4247	4.4004	6.1133	4.8445	5.1954	5.7324	4.8252	5.1649	7.1847	6.7164	8.3999	6.2302	7.4969	7.1364	6.7141	7.1936	6.622	6.2405	7.3168	7.4243	5.8272	6.6472	7.4713	6.6249	6.3225	7.2595	7.1781	5.9017	7.1109	6.731	6.6848	7.5202	7.4524	5.8018	4.1013	4.8827	5.266
hsa-miR-4481		1.53585	3.06214	4.37775	2.71048		0.00314479	0.0184858		0	3.7585	4.514	0	4.4004	0	0	0	0	0	4.2215	4.2513	4.0859	3.0708	3.0978	3.4999	4.177	0	4.1766	3.2832	0	4.9764	4.2867	0	3.9644	4.8964	4.5915	5.775	4.2668	2.8323	4.9017	3.7759	5.1915	3.8435	3.8198	4.2608	3.193	0	4.1122	3.3729
hsa-miR-4490		0	0.55705	1.58231	0		0.00303061	0.0181679		0	0	0	0	0	0	0	0	0	0	0	0	0	2.6558	0	1.915	0	0	0	0	0	0	3.2279	0	0	0	3.5915	0	3.3233	0	4.2802	0	3.0871	0	0	3.1233	0	0	0	0
hsa-miR-4500		5.3009	6.59765	5.60739	6.19127		3.91219e-07	1.12869e-05		5.5066	5.0215	6.0545	5.0837	4.9029	5.2861	5.7831	5.8143	4.8435	4.3227	5.691	6.4908	6.3855	7.1752	6.7011	5.9854	6.3647	7.4258	6.7615	6.7655	6.8779	6.4651	5.9283	6.3126	6.7277	5.5593	5.7614	6.1335	5.1148	5.5979	5.8277	5.674	5.4656	5.3029	5.9193	5.3249	5.4561	5.9207	6.4842	6.8135
hsa-miR-4505		0	0.755471	0.789082	3.00281		6.19983e-06	0.000115359		0	0	0	0	0	0	0	0	0	0	0	3.2513	0	0	0	0	0	3.5125	0	0	0	0	3.8128	0	0	0	0	0	3.0823	2.2474	0	0	3.3502	0	0	0	3.4561	3.7142	0	3.5656
hsa-miR-450b-3p		0	1.06908	0.735618	2.41601		0.00328304	0.0191193		0	0	0	0	0	0	0	0	0	0	0	3.2513	0	0	0	1.915	3.329	0	3.6911	2.7807	0	0	0	0	0	0	0	4.1901	0	0	3.9017	0	0	0	0	0	0	3.5988	0	3.1505
hsa-miR-4510		7.34451	7.19371	7.5083	11.0277		1.62169e-26	1.35681e-23		7.4786	7.481	7.6395	6.7617	7.4878	7.4612	7.4979	7.3767	6.9215	7.2923	7.3914	7.0122	7.2983	7.1326	7.4362	6.5238	7.4165	7.9002	7.3078	7.2937	7.3486	7.3885	6.6541	7.0162	6.9833	8.5922	7.3194	7.9895	6.689	7.0287	7.6132	8.0512	7.1746	7.4874	7.5593	7.0868	9.8851	11.204	10.858	11.51
hsa-miR-4511		0	1.06483	0.556482	2.15973		0.00524178	0.0275553		0	0	0	0	0	0	0	0	0	0	0	2.6664	0	2.7489	0	2.0525	0	0	3.3692	0	4.0706	0	0	0	0	0	3.1765	0	2.9448	0	0	0	0	0	0	0	0	0	3.6097	3.4725
hsa-miR-4512		2.99571	1.59234	4.26112	4.03446		0.00155242	0.011187		5.1281	0	6.0087	0	4.2748	4.2388	3.5814	0	4.176	5.545	0	3.2513	0	0	4.0978	0	3.7076	3.8535	0	0	0	4.3441	0	0	3.0384	4.6333	4.4495	5.3965	4.2668	2.8323	5.2802	4.7088	5.3502	5.0659	0	4.8888	4.193	4.0138	4.8321	3.9579
hsa-miR-4516		5.68544	5.6597	5.50925	7.13308		0.00066552	0.0054769		6.1984	5.524	5.142	6.3862	5.1373	6.7242	4.4294	5.8474	5.5804	5.6919	5.8786	4.1258	5.1928	4.0708	5.9365	5.451	7.0732	6.6609	7.088	4.7807	7.6066	4.4145	3.4502	7.6911	5.6937	6.5782	5.9491	6.1043	5.5536	4.9915	5.8651	6.0169	4.6721	5.9024	4.2604	4.7082	6.5005	7.465	8.5639	6.1202
hsa-miR-451a		13.9708	15.0955	15.362	14.0104		2.27015e-06	5.1334e-05		13.96	14.063	13.921	14.015	13.612	14.62	13.799	14.286	13.982	13.694	13.727	14.695	15.74	16.372	14.427	15.341	14.721	15.557	14.713	15.68	15.288	14.764	14.415	15.291	14.333	16.897	14.99	15.527	13.674	15.66	15.71	15.908	14.92	15.814	15.076	14.806	12.622	12.739	14.642	13.994
hsa-miR-451b		8.2367	8.75155	9.14822	8.93299		0.00650337	0.0323878		8.3453	8.1508	8.2929	7.9712	8.1283	8.7707	7.9033	8.5679	8.1054	8.2999	8.068	8.4079	9.3584	9.5762	8.3515	8.4084	8.6292	9.3095	8.5223	9.5244	8.53	8.9676	8.2051	8.6096	8.1216	9.4277	8.7208	9.8862	7.2953	9.3167	9.6539	9.84	8.8841	9.8952	8.9608	8.7497	7.5077	7.553	9.3867	9.0911
hsa-miR-4524a-5p		0	1.55217	2.53205	1.27336		0.00422399	0.0231996		0	0	0	0	0	0	0	0	0	0	0	0	0	2.0708	0	2.6805	3.329	3.413	3.5916	0	0	3.6071	0	0	3.0384	0	2.9134	4.3965	3.0823	2.5104	0	0	4.2888	3.718	3.3344	3.6087	0	3.8212	0	3.3729
hsa-miR-4532		6.20394	7.89074	7.36568	8.38209		2.87155e-06	6.00633e-05		5.8505	6.0513	5.3025	6.4622	6.2077	6.2861	5.617	7.0604	6.5148	6.8462	6.0446	8.6283	7.5703	6.3782	9.0083	6.2725	7.6795	8.9025	7.7899	6.325	8.3634	7.362	9.6014	8.3928	8.1962	8.0862	8.1951	6.0132	8.3337	6.6328	8.6619	8.0846	6.3044	7.0267	6.5516	7.1323	8.6092	9.5988	8.2915	8.1655
hsa-miR-4533		1.65452	1.9765	4.22297	3.13555		0.00266213	0.0166218		4.2656	0	4.9614	4.6362	0	0	0	0	4.3365	0	0	3.1689	0	0	3.3973	3.2369	4.3994	0	3.7842	2.5176	0	0	3.4502	0	3.7165	4.2183	4.6359	4.7376	3.7928	2.8323	5.2236	3.9014	4.6721	4.718	3.9193	3.8014	4.515	3.9207	0	3.5656
hsa-miR-4634		5.01885	3.72834	5.2158	4.85475		0.00261747	0.0164491		5.1984	4.6065	5.9125	5.4247	4.7223	4.7242	3.7189	5.3422	4.8435	5.4926	5.2215	4.5409	4.8117	3.8364	4.2553	2.6805	4.8145	4.7755	4.6422	3.588	0	4.4145	5.1665	0	4.6707	5.4813	5.1461	5.6596	5.8517	4.3849	5.3346	4.6384	5.3799	5.1165	5.2219	5.1589	5.193	4.968	5.2342	4.4236
hsa-miR-4635		5.78662	4.21437	4.92175	5.70743		2.87067e-10	1.9474e-08		5.8505	6.137	6.514	6.4987	5.8598	5.6538	5.1175	5.4324	5.2179	5.4926	5.8786	3.9394	3.0859	3.9968	4.0978	3.6805	4.8145	4.3605	4.4847	3.6551	4.6555	4.9291	4.7722	4.6428	3.8864	4.5593	4.7614	6.1043	5.1465	4.449	5.0392	4.5644	5.4376	5.0134	4.4048	4.6593	5.9796	6.1013	5.9789	6.1354
hsa-miR-4638-5p		2.47322	0.364686	0.293145	1.89262		0.00460602	0.0248626		0	0	5.4468	4.4987	4.7223	3.6538	3.7189	0	0	0	5.1649	0	0	0	0	1.915	0	3.1906	0	0	0	0	0	0	0	0	0	0	0	0	0	0	3.2246	0	0	0	3.778	4.1013	0	0
hsa-miR-4640-5p		0.410527	3.65101	3.66011	0.813533		2.4942e-07	8.02619e-06		0	0	0	0	4.5158	0	0	0	0	0	0	3.7819	3.7778	3.6069	4.0412	2.5931	4.5921	4.065	4.5916	3.1026	4.3336	4.7771	4.2279	0	3.6234	4.2183	3.9134	5.8819	4.6229	3.3178	5.3346	0	4.5201	4.0659	0	4.3863	3.3305	0	0	0
hsa-miR-4646-3p		5.30208	4.7556	5.15368	6.18092		0.000404718	0.00357955		4.9761	5.2945	5.8094	5.8206	5.5703	3.7913	4.7189	5.6734	5.5148	5.8252	5.3284	5.0587	4.4298	3.7031	4.4417	3.763	4.9613	4.7755	4.9937	5.173	5.3925	4.7226	5.3153	5.4313	4.4169	4.6333	5.4741	5.2445	4.9448	4.5693	6.2802	6.1238	4.5725	5.346	3.9193	5.5827	5.9796	7.8212	3.8321	6.7847
hsa-miR-4650-5p		0.337264	1.52359	2.36264	3.81275		2.1208e-05	0.000324586		0	0	0	0	0	0	0	3.7099	0	0	0	2.7819	3.7074	0	3.3042	2.2935	0	0	0	3.1026	0	0	3.1023	0	3.0384	0	3.0509	4.6596	3.0823	0	0	4.4039	3.2246	4.0659	0	3.5018	4.9586	4.1837	4.1946	3.3729
hsa-miR-4651		5.15288	3.37506	4.1115	4.53765		2.99393e-05	0.000422178		5.9761	4.7585	5.5781	5.8206	5.4004	5.0868	4.7831	4.4755	4.789	4.9076	5.106	2.5409	4.0859	2.8364	4.0412	2.5931	4.651	3.065	3.9542	3.1957	4.556	3.3441	4.5009	0	3.8864	3.7708	4.0509	5.297	4.4809	3.0954	5.5339	4.1238	3.7652	3.5805	3.3344	4.1937	4.8253	4.8212	3.9316	4.9579
hsa-miR-4655-5p		4.67514	3.22956	4.106	5.17107		0.00561792	0.0290144		4.8936	4.896	5.8094	5.2642	0	5.2388	4.347	5.7099	4.176	5.9856	5.106	3.605	3.7778	2.7489	3.4848	3.1166	4.4665	4.1906	4.3692	3.4436	0	4.0222	4.1023	0	3.8864	0	4.679	6.1335	3.9448	3.0954	5.0392	3.7759	4.7652	5.468	3.8198	4.4452	5.515	4.4061	4.4842	5.2094
hsa-miR-4658		0	1.19031	2.24379	0.909658		0.00703002	0.0343964		0	0	0	0	0	0	0	0	0	0	0	2.9883	0	2.2083	2.7192	2.6805	0	3.413	0	2.6551	0	0	0	0	0	0	3.1765	3.8116	4.0152	3.0129	0	0	3.2246	3.8435	3.5974	0	4.2634	0	0	0
hsa-miR-4659a-3p		0	1.8099	1.00735	0.240625		0.0040933	0.0226803		0	0	0	0	0	0	0	0	0	0	0	3.0814	2.7074	3.2083	0	2.4004	3.5921	3.6931	3.6911	0	0	0	2.9648	0	0	0	3.8394	0	0	0	0	3.7759	3.4656	0	0	0	0	0	0	2.8875
hsa-miR-4666b		2.70655	4.99519	4.61881	5.07776		0.000159622	0.00165559		4.8936	0	5.2244	4.6362	0	3.6538	0	3.973	3.4105	0	3.9805	3.7253	5.5753	3.7933	4.9519	4.7829	6.9729	4.3605	6.75	4.1499	5.8361	5.1514	5.0004	5.7069	3.1759	4.4813	4.5915	5.3476	3.8708	4.0129	5.8277	4.7759	5.0131	4.5805	4.5974	3.7082	5.4561	4.4732	4.8321	5.5198
hsa-miR-4667-5p		0.392973	3.12059	2.27761	1.73168		0.000794901	0.00633397		0	0	0	0	0	0	0	0	0	4.3227	0	2.6664	2.9704	2.6558	2.9823	3.2935	3.8145	3.1906	4.1062	3.1026	4.2081	3.3441	3.5498	0	3.8039	0	3.1765	5.0132	3.5298	2.2474	0	0	3.7652	0	3.7129	3.6087	4.119	0	3.3466	3.266
hsa-miR-4668-5p		2.02957	3.84036	4.02671	4.49978		0.00713365	0.0347336		0	0	0	0	4.1373	4.5018	0	4.0884	4.3365	5.2613	0	4.5409	3.9704	2.8364	4.4848	4.763	4.8651	3.413	4.9937	4.588	0	3.6071	3.3433	4.6428	3.7165	0	3.9134	5.297	3.4303	4.4173	5.0392	5.2233	4.3502	3.5805	3.5974	5.4452	5.9155	0	5.1122	4.61
hsa-miR-4676-5p		0.421473	2.09701	2.676	0.835283		0.00848595	0.0394076		0	0	0	4.6362	0	0	0	0	0	0	0	2.6664	2.8449	0	0	2.915	0	3.065	3.3692	2.7807	0	4.2701	3.7304	0	3.7165	3.7708	4.2354	4.8819	4.0152	0	3.9017	0	4.4656	4.1654	0	0	0	0	0	3.3729
hsa-miR-4677-5p		4.717	2.65509	2.30089	4.15913		4.2155e-05	0.000553974		4.5066	4.6065	4.3765	4.8772	5.7223	4.3319	4.8445	5.0319	3.9955	4.9856	4.6085	2.5409	0	3.2083	2.7192	3.178	3.4665	4.5598	3.5916	2.8961	0	3.6071	4.2279	0	3.1759	3.6333	3.1765	4.7376	3.3233	3.0129	0	0	0	4.1654	0	3.2608	4.119	4.968	4.0247	4.266
hsa-miR-4683		6.50646	5.77239	6.05465	5.0437		2.47166e-06	5.44199e-05		6.4208	6.646	7.0087	7.2642	6.4301	6.2388	5.6858	6.5975	6.0659	6.715	6.4983	5.5892	5.6522	4.8782	5.9823	4.1166	6.4165	6.235	6.2761	5.4051	5.9966	6.0445	6.3011	6.1375	5.7826	5.9261	5.7614	7.2311	6.4809	5.0752	6.3077	4.7759	6.6356	6.4285	5.8198	6.1589	5.119	5.1013	5.5483	5.3729
hsa-miR-4685-3p		1.12215	3.12666	3.65139	3.40394		0.00347391	0.0199989		0	3.7585	0	0	0	0	0	3.8474	0	4.7377	0	3.6664	3.7074	3.6069	3.9209	4.2655	3.8145	0	3.7842	4.003	0	3.9291	4.5009	0	4.5744	3.7708	4.2919	3.9491	3.3233	3.3178	4.3871	4.6384	4.3502	4.4285	0	3.7082	5.2287	0	3.6097	5.0891
hsa-miR-4685-5p		0.673845	1.51894	3.73075	1.54503		0.00103139	0.00789265		0	3.7585	0	0	0	3.6538	0	0	0	0	0	0	0	0	2.9823	0	3.5921	5.306	3.1062	3.1026	0	0	0	0	3.1759	3.6333	4.0509	4.8116	3.7104	3.0954	4.9017	4.3164	3.7652	4.4285	0	4.3249	0	3.9207	0	3.025
hsa-miR-4687-5p		5.44024	3.82964	4.46509	5.28109		0.000125333	0.00136777		6.8285	5.722	6.0087	4.6362	5.4004	4.4194	4.1664	4.973	5.3365	5.4381	6.9134	3.9394	3.4729	2.9968	4.2553	3.0525	4.5307	5.065	4.5391	4.1026	4.3336	4.8801	4.7304	0	3.7165	4.1188	4.2354	5.2445	4.5298	3.1734	4.8277	4.9014	5.0131	4.6508	3.9193	4.5018	5.9372	5.3714	5.5793	5.4725
hsa-miR-4697-5p		0	1.2146	2.41269	0		5.905e-05	0.000730126		0	0	0	0	0	0	0	0	0	0	0	0	0	2.2083	0	1.915	3.329	0	3.1062	3.1026	0	0	3.3433	0	0	0	2.9134	4.8116	4.0152	3.0129	4.8277	0	3.5725	0	0	3.3863	0	0	0	0
hsa-miR-4713-3p		0	2.68296	2.98217	1.20123		0.00176963	0.0123041		0	0	0	0	0	0	0	0	0	0	0	0	0	0	3.5672	3.1166	4.762	2.9275	4.7842	4.5532	0	4.9291	3.2279	0	5.6937	3.6333	5.1461	6.3225	3.0823	0	0	0	5.7194	5.3029	3.5974	0	4.2634	0	0	3.7355
hsa-miR-4718		6.09295	3.85776	4.5884	4.53858		6.8582e-07	1.81201e-05		6.3607	5.8628	6.5464	6.131	6.5968	5.5018	5.9599	6.0604	5.6432	6.6684	5.691	3.7253	4.0293	2.9968	4.3973	3.0525	4.8145	4.1292	4.6422	3.5176	4.4491	4.5457	5.1347	0	4.5744	4.3114	4.1765	6.3723	4.6673	4.0129	4.2802	4.1238	5.2888	4.718	4.2604	4.2608	4.7291	4.6577	4.417	4.6949
hsa-miR-4725-3p		5.61262	4.78354	5.45955	5.11267		5.83275e-05	0.000724762		5.561	5.3908	5.755	6.2642	5.6734	5.5018	4.7831	5.5975	5.5804	6.0231	5.6085	4.2909	5.1134	3.9583	4.8236	4.178	4.8651	5.278	5.0697	4.622	4.2081	4.9291	5.5736	4.6428	5.4169	5.4407	5.3989	6.1043	4.9804	4.9478	5.5339	5.3608	5.7425	5.6848	5.536	5.3249	5.041	4.8212	5.1122	5.1505
hsa-miR-4726-3p		4.27935	4.18209	3.93944	2.23312		0.00249308	0.0159204		4.3911	4.3434	5.0545	6.0347	5.2077	3.6538	4.347	4.9116	0	4.9076	4.2215	4.2909	3.5554	2.0708	4.2047	3.8785	4.5921	3.8535	4.5916	3.8395	4.7486	4.8801	4.8128	4.9907	4.24	4.7708	3.9134	4.7376	3.5298	2.2474	5.2236	0	5.0131	3.5805	5.0568	5.2608	3.193	0	3.3466	2.8875
hsa-miR-4732-3p		6.97045	7.61324	7.11587	8.10814		0.00188904	0.0128522		6.8505	6.722	6.9372	6.9047	6.8815	7.3653	7.001	7.486	7.9528	5.545	7.0289	7.5693	7.0365	8.3111	7.1388	6.924	7.6144	8.2531	7.4707	7.7153	8.7654	6.9764	7.0092	8.6752	7.1259	8.7667	7.278	7.297	6.0986	7.4012	6.7892	7.6111	6.5981	7.3029	6.8069	6.3249	7.2548	7.1534	9.3466	8.2202
hsa-miR-4738-3p		0	1.75316	1.66219	2.7348		0.00118579	0.00888455		0	0	0	0	0	0	0	0	0	0	0	2.6664	3.0859	2.9968	0	3.178	0	3.5125	3.1062	2.8961	0	0	3.1023	0	0	0	0	4.5771	2.9448	2.8323	4.1647	0	3.7652	0	0	0	4.119	4.0138	0	3.3729
hsa-miR-4742-3p		0	2.43799	1.93208	0.806108		0.000731734	0.00596316		0	0	0	0	0	0	0	0	0	0	0	3.4737	2.8449	3.1412	3.6452	3.0525	3.8145	3.7755	4.1062	0	0	0	3.1023	0	3.1759	4.0118	0	4.0746	3.4303	2.6259	0	3.7759	0	0	3.3344	0	0	0	0	3.1505
hsa-miR-4743-3p		0	1.80273	2.68416	1.24802		0.00480579	0.0257197		0	0	0	0	0	0	0	0	0	0	0	2.9883	3.0859	2.3339	0	2.178	0	3.306	3.5916	3.9506	0	0	0	0	3.8039	0	4.0509	5.6991	0	3.5693	4.5797	0	3.8527	4.0659	0	3.7082	3.3305	0	0	0
hsa-miR-4744		2.74715	4.89839	4.24915	1.84813		0.000101543	0.00114807		0	4.137	5.0545	0	4.4004	3.7913	0	3.7099	4.4809	4.6446	0	4.5077	4.6709	4.1752	5.0412	4.178	4.8651	6.0485	5.2437	3.7193	4.8361	5.3797	5.8523	4.8838	5.1759	4.5593	3.679	5.7376	4.8708	4.3178	4.9017	0	5.0506	4.4285	4.536	4.6593	3.3305	0	0	3.7355
hsa-miR-4745-5p		0.783109	2.84436	3.46471	3.27305		0.00178383	0.0123345		0	0	0	0	0	0	0	0	3.789	4.8252	0	3.9394	3.6334	2.5562	3.9209	2.841	0	4.1906	3.4847	2.8961	0	4.0222	4.4502	0	3.8864	0	4.0509	4.8819	4.5298	3.6259	4.4866	0	4.0871	4.5065	4.3344	3.6087	4.193	4.8212	0	3.3729
hsa-miR-4748		1.88453	3.83046	3.65662	5.01472		7.35131e-05	0.000882861		0	4.3434	4.3765	0	0	4.1393	0	0	3.6735	4.1971	0	3.8888	4.5949	3.9583	3.8567	3.4999	3.5921	3.1906	0	5.0783	4.9966	4.9764	2.9648	4.9907	4.0384	4.1188	4.0509	4.8819	3.2079	4.283	3.9017	4.1238	3.5725	4.5805	0	3.5018	4.119	4.1013	4.8827	4.775
hsa-miR-4750-3p		0.744782	0	2.59024	1.23013		0.000793419	0.00633397		0	0	0	0	0	0	0	0	3.9955	4.1971	0	0	0	0	0	0	0	0	0	0	0	0	0	0	0	0	3.0509	4.297	3.0823	0	4.0392	0	3.2246	3.718	3.4719	3.6087	4.041	0	0	0
hsa-miR-4760-3p		0	3.99811	4.95807	0.49585		4.50057e-14	7.06027e-12		0	0	0	0	0	0	0	0	0	0	0	5.3482	4.3855	3.3927	4.6452	3.5472	5.4334	4.6056	5.3692	4.1499	0	5.0222	5.0004	0	5.074	3.8964	4.8394	6.0442	5.4043	4.9027	4.1647	4.0169	6.6356	5.0659	4.5974	4.9713	0	0	0	0
hsa-miR-4760-5p		0	0.221614	1.82065	0.54695		0.00262178	0.0164491		0	0	0	0	0	0	0	0	0	0	0	0	0	0	0	0	0	0	0	3.1026	0	0	0	0	0	3.8964	0	4.1901	3.0823	2.3849	0	0	3.0871	0	0	3.3863	0	0	0	0
hsa-miR-4762-5p		0	2.27739	1.05162	0		0.000110809	0.00122524		0	0	0	0	0	0	0	0	0	0	0	3.1689	0	2.8364	3.5672	2.4999	4.0071	0	3.8717	0	0	4.0222	4.2867	0	3.6234	0	3.5915	3.8116	0	0	4.1647	0	0	0	0	0	0	0	0	0
hsa-miR-4766-5p		0.356082	2.83949	2.74488	1.16448		0.000363106	0.00330919		0	0	0	0	0	3.9169	0	0	0	0	0	3.4737	2.9704	2.5562	3.2047	2.763	3.329	3.413	3.2437	3.003	0	3.3441	4.0352	0	4.4169	0	2.9134	5.1335	3.5298	3.1734	4.0392	0	3.8527	4.1654	0	3.3863	0	0	0	3.3729
hsa-miR-4772-3p		1.80537	4.91631	2.92878	4.45422		0.000147282	0.00155982		0	0	4.3765	0	0	3.9169	4.0668	4.0884	3.4105	0	0	4.7253	3.9704	5.8782	3.7192	6.4004	4.177	7.8956	4.1062	4.6875	4.6555	5.4816	4.4502	4.5053	4.1759	0	3.0509	4.3965	0	4.3178	0	0	5.5981	3.8435	5.536	5.4738	5.2287	3.5988	4.1122	4.025
hsa-miR-4772-5p		0	2.02866	0.631191	1.13961		0.00581682	0.0297964		0	0	0	0	0	0	0	0	0	0	0	2.4034	0	3.6558	0	3.4004	3.329	0	3.4847	2.7807	0	3.3441	2.9648	0	3.0384	0	0	0	0	0	0	0	0	0	3.3344	3.6087	3.778	0	0	0
hsa-miR-4779		0	0.390671	1.30459	2.36606		0.00055239	0.00468412		0	0	0	0	0	0	0	0	0	0	0	0	0	0	0	2.2935	0	0	0	0	0	0	0	0	3.1759	0	3.2919	3.9491	2.9448	0	4.1647	0	0	0	0	0	3.778	0	0	3.4725
hsa-miR-4781-5p		0.437764	0.880471	2.61999	0		0.000572286	0.00483649		0	0	0	0	4.8154	0	0	0	0	0	0	0	0	0	0	0	0	0	3.4847	0	0	4.4816	0	0	4.3603	0	3.9838	3.9491	2.9448	2.5104	0	3.6384	4.5201	0	3.4719	3.8014	0	0	0	0
hsa-miR-4782-5p		0.354182	5.32089	5.42683	1.48173		1.65538e-15	3.4625e-13		0	3.896	0	0	0	0	0	0	0	0	0	5.5244	5.494	4.7031	5.3973	4.451	4.914	5.4636	4.5916	4.325	5.3925	6.7903	5.8523	5.3533	6.24	5.1188	5.3464	5.8116	6.0152	5.1349	5.2236	5.0713	5.994	5.5805	4.5974	5.8014	3.4561	4.0138	3.4842	3.9579
hsa-miR-4787-5p		4.9173	3.99044	4.57369	4.55949		0.000903161	0.00704017		4.9761	4.524	5.8094	5.5691	4.7223	4.5018	4.6518	4.9116	4.8435	5.0596	4.5211	4.2909	3.7778	3.2083	3.8567	2.763	3.7076	4.413	3.4847	3.7193	4.7486	4.2701	4.4502	4.5053	4.6707	4.3989	4.9491	5.7376	4.5298	3.5104	4.9017	5.0713	5.0506	3.718	4.1824	4.2608	4.6785	5.2617	4.1946	4.775
hsa-miR-4788		0.7577	2.58352	3.25898	0.797267		0.000754748	0.00611103		0	0	0	0	0	4.1393	0	4.1954	0	0	0	3.1689	0	3.1412	0	2.5931	3.5921	3.9979	3.9542	3.1026	0	4.4145	3.9648	0	4.24	3.7708	4.2919	4.9491	3.7928	3.2474	0	3.6384	4.8527	0	3.3344	3.9713	0	3.5988	0	0
hsa-miR-4789-5p		0	1.68352	2.66091	0		1.33693e-05	0.000219326		0	0	0	0	0	0	0	0	0	0	0	2.4034	3.7074	2.2083	0	0	3.329	0	4.3078	0	0	3.7226	3.8908	0	0	0	3.5915	5.2445	3.0823	2.3849	0	0	3.7652	4.2585	3.3344	3.6087	0	0	0	0
hsa-miR-4795-3p		1.25351	3.48001	2.85558	1.45857		0.00773453	0.0369081		0	0	4.3765	4.9841	0	0	0	0	0	0	4.428	3.0814	3.2923	2.3339	4.4417	3.0525	3.914	3.6931	4.1766	4.1026	4.0706	4.8801	3.9648	0	3.7165	3.8964	2.9134	5.3476	3.9448	2.6259	0	0	4.5201	4.9024	0	3.2608	3.8711	0	3.9316	3.1505
hsa-miR-4796-5p		0	2.15361	2.44009	0		0.000186965	0.00188467		0	0	0	0	0	0	0	0	0	0	0	0	0	0	0	2.178	3.914	3.413	3.7842	4.003	0	4.2701	3.5498	0	5.0384	0	4.5457	5.6596	3.0823	0	0	0	4.4656	5.1165	0	3.9713	0	0	0	0
hsa-miR-4798-5p		0	0	1.31282	0.277975		0.00825189	0.0386422		0	0	0	0	0	0	0	0	0	0	0	0	0	0	0	0	0	0	0	0	0	0	0	0	0	0	0	0	0	0	4.1647	0	3.0871	3.5805	0	3.6087	0	3.3357	0	0
hsa-miR-4804-3p		0.686627	2.39481	3.23253	0.847008		0.000948409	0.00734724		0	0	0	0	0	0	0	3.7099	0	0	3.843	2.4034	3.5554	3.1412	3.0978	2.4999	3.7076	3.8535	3.1062	3.588	0	0	0	0	4.5744	4.7037	3.7614	5.2445	3.8708	2.3849	3.9017	3.6384	0	4.718	3.3344	0	0	0	0	2.8875
hsa-miR-4804-5p		0.322545	1.24827	2.09449	0		0.00283691	0.0173674		0	0	0	0	0	0	0	0	3.548	0	0	0	0	2.3339	0	2.4999	3.329	2.9275	0	3.2832	0	0	3.1023	0	0	0	4.2354	3.8116	0	0	0	0	3.0871	4.5065	3.5974	3.8014	0	0	0	0
hsa-miR-484		9.09749	10.1578	10.2476	9.56733		2.40864e-06	5.39793e-05		9.1941	9.0876	9.1683	8.7988	8.5636	9.4534	9.0604	9.5276	9.6023	8.7377	8.8786	10.433	10.365	10.973	9.2861	10.165	9.6884	10.334	9.7253	10.605	10.475	9.6606	9.7277	10.407	10.364	11.501	10.396	10.599	9.7117	10.359	10.24	10.456	10.025	9.7282	9.9373	9.77	9.7197	8.853	10.456	9.1449
hsa-miR-486-3p		14.061	14.613	14.303	15.0849		0.00262793	0.0164491		13.856	13.958	14.397	13.802	13.803	14.252	13.824	14.499	14.6	13.56	14.12	14.6	14.34	14.6	14.308	13.413	14.698	14.934	14.62	14.503	15.932	13.741	14.317	15.957	14.619	15.555	15.032	14.705	13.197	14.649	13.739	14.826	13.87	14.345	13.951	13.464	14.712	14.749	15.812	15.246
hsa-miR-488-5p		0.402545	2.31671	2.84276	1.24159		0.00823004	0.0386422		0	0	0	0	0	0	0	0	0	0	4.428	3.2513	0	3.3339	0	3.1166	4.0071	3.8535	3.9542	2.8961	0	0	3.5498	0	4.4714	3.6333	0	4.8116	4.0152	3.1734	0	0	3.9351	3.718	4.0125	3.9713	3.193	3.4732	0	3.7355
hsa-miR-495-3p		1.59649	2.32364	2.18185	0		0.00883858	0.040856		4.2656	0	4.9614	0	4.1373	0	0	0	0	4.1971	0	4.6664	2.9704	0	3.2047	2.5931	3.8145	0	3.6911	3.8961	0	0	3.8908	0	3.8039	0	3.1765	3.9491	0	4.2474	0	4.5644	4.4656	0	3.5974	0	0	0	0	0
hsa-miR-497-3p		0.376091	0	0.617327	3.90048		6.48174e-11	5.08411e-09		0	4.137	0	0	0	0	0	0	0	0	0	0	0	0	0	0	0	0	0	0	0	0	0	0	0	0	0	0	0	2.6259	4.1647	0	0	0	0	0	4.778	4.4061	4.417	4.266
hsa-miR-497-5p		5.86518	6.33034	6.2522	4.64563		1.42074e-13	2.09769e-11		5.9354	6.4138	5.6395	5.3467	5.9029	5.7913	6.2137	6.0027	5.6735	5.867	5.7305	6.4302	6.7253	6.2487	6.7282	5.5238	6.651	6.7036	6.5391	6.3656	6.2405	6.0445	5.9283	6.3533	6.1427	7.5688	6.4495	6.0132	5.7726	6.2108	5.6241	6.0444	6.0131	6.718	6.0348	6.3249	4.5715	4.4061	4.8321	4.61
hsa-miR-5001-3p		1.22996	3.53901	2.12188	3.88918		0.000363351	0.00330919		0	4.2439	0	0	0	0	0	0	4.548	4.7377	0	3.7253	3.7074	3.3339	0	3.1166	3.914	4.7349	4.2437	3.003	4.2081	3.3441	3.6429	4.7683	3.8039	4.3114	3.7614	3.9491	0	3.3178	0	0	3.5725	4.4285	0	0	4.193	4.0138	4.0247	3.8135
hsa-miR-5007-5p		5.0327	2.68367	3.70826	4.67972		7.18243e-05	0.000866726		4.8936	5.3434	4.755	4.9841	6.0633	5.5018	3.9599	4.4755	4.176	5.9856	5.2215	3.9883	3.3855	2.9188	3.7192	2.9854	4.5921	3.6931	4.4281	3.8961	0	0	3.9648	0	0	4.1188	4.2354	4.8116	4.0823	2.8323	3.9017	0	4.2888	4.5065	3.8198	4.1937	5.0806	5.1013	4.417	4.266
hsa-miR-5009-5p		0.365591	1.29581	0.488245	2.71218		0.000885326	0.00696604		0	4.0215	0	0	0	0	0	0	0	0	0	2.8888	0	2.4493	0	2.4999	0	3.413	0	2.7807	0	4.1096	0	0	0	0	0	0	0	2.2474	0	0	0	0	0	3.1233	3.6785	0	3.4842	4.1505
hsa-miR-500a-3p		1.96267	5.72891	5.46396	5.14027		6.68556e-10	3.81381e-08		0	0	4.3765	4.4987	4.1373	0	3.5814	0	4.9955	0	0	5.3852	6.0002	6.0887	4.9823	6.2584	5.8898	5.9806	5.934	5.5707	6.3032	5.4816	5.5009	5.8272	5.0019	5.8033	5.5457	5.775	4.9083	5.9698	4.9017	5.2706	4.8096	5.5065	5.4719	6.1412	5.363	4.1013	5.7796	5.1505
hsa-miR-5010-5p		4.6394	4.31699	4.32185	5.14719		0.000109753	0.00121894		4.2656	4.896	4.6395	4.6362	4.8154	4.2388	4.2595	4.5579	5.4105	4.9856	4.3284	3.4034	4.0859	4.3927	4.2047	3.915	3.8145	4.5125	4.0322	4.325	4.9186	4.4816	4.1665	4.8838	5.3014	5.2183	4.0509	3.9491	4.2079	4.1734	4.2802	3.6384	4.8945	4.5065	4.8198	3.8014	4.4561	5.0582	5.6686	4.775
hsa-miR-5011-5p		0.760127	3.52689	2.85435	2.28856		0.00198609	0.013223		0	0	4.514	0	0	0	0	3.8474	0	0	0	2.7819	2.9704	2.7489	3.5672	2.763	4.329	0	4.5916	2.7807	5.141	3.4816	3.5498	5.7069	4.9644	0	3.7614	5.0132	4.0823	2.6259	4.1647	0	4.5725	3.8435	3.3344	0	3.193	0	3.4842	3.8135
hsa-miR-501-3p		5.10083	6.62204	6.87168	6.33482		6.37759e-12	5.9288e-10		5.1281	5.3434	4.8619	5.4987	4.6228	5.7242	5.0144	5.388	5.374	4.8252	4.3284	6.1148	6.6239	6.6006	5.7724	6.4385	6.8898	7.2566	6.9032	6.9236	7.4491	6.1307	6.5009	7.066	6.0384	7.6864	7.4741	7.4085	6.6563	7.0392	6.4624	6.7922	6.409	6.5065	6.4218	6.7321	5.9586	5.7952	6.9789	5.9579
hsa-miR-501-5p		2.75319	4.4899	4.70327	4.48373		0.000901197	0.00704017		5.0541	0	0	4.8772	4.4004	4.3319	3.7189	0	0	4.0596	3.843	4.9394	3.9704	5.3187	4.0412	5.4132	4.177	3.413	4.3692	3.003	4.8361	4.1921	5.6202	4.9907	4.5744	4.6333	4.4495	4.8819	4.9804	4.0547	4.9721	4.0169	4.9746	5.346	4.8704	4.5562	5.3305	4.1837	3.9316	3.8875
hsa-miR-502-3p		2.51163	5.75645	5.73938	4.10714		8.3459e-06	0.000147523		0	4.3434	0	4.8772	0	4.2388	0	4.388	5.0428	4.7377	0	5.4908	5.9246	6.1239	5.3746	5.6591	5.9613	6.1134	6.0131	5.7807	6.1062	5.6369	5.6202	5.6428	5.1427	6.5209	5.8769	6.4438	5.6002	5.48	5.1033	5.9889	5.3799	5.6161	5.7673	5.3559	4.4561	0	5.5483	4.2094
hsa-miR-503-5p		6.69254	6.37282	6.55538	7.31781		0.00294508	0.0178124		6.9354	6.7585	6.8619	6.6686	6.1373	6.5798	7.2819	6.388	6.5804	6.3815	7.0446	6.3482	6.2803	6.5562	6.012	7.1008	6.499	6.844	6.399	6.5707	6.034	5.3797	6.1665	6.3126	6.7165	7.9767	7.3194	6.4204	6.3644	5.8912	6.8465	6.1744	5.7876	6.2127	6.6707	6.4452	6.6785	7.5216	8.48	5.4963
hsa-miR-505-3p		5.09438	5.9133	5.72515	5.22232		0.000115284	0.00126914		4.9761	5.6845	5.142	5.3467	4.4004	4.9758	4.5814	5.4324	4.8959	5.4381	5.1649	5.7396	5.7778	6.1918	5.5058	7.1244	5.914	5.5598	5.715	5.2618	6.8147	4.9764	5.8327	6.798	5.5744	6.0118	6.1151	5.9815	5.7104	5.6259	5.709	5.6019	5.7425	4.8435	5.567	6.0681	5.2974	5.7142	5.8061	5.3985
hsa-miR-507		0.735945	0.865057	2.95923	2.53337		0.00920597	0.0422431		0	0	4.514	0	0	0	3.5814	0	0	0	0	2.8888	0	0	0	2.6805	0	0	0	3.3656	0	0	0	0	3.1759	0	3.9134	3.8116	3.9448	2.9254	6.1343	5.0169	3.2246	3.5805	0	0	0	4.968	0	4.3205
hsa-miR-5087		0	1.54575	1.38489	0		0.00308763	0.0184084		0	0	0	0	0	0	0	0	0	0	0	2.8888	2.8449	0	0	2.915	0	0	3.3692	3.1026	0	3.4816	0	0	3.0384	0	3.1765	4.4896	0	0	0	0	0	3.959	0	3.6087	0	0	0	0
hsa-miR-5095		5.1819	4.07342	5.05305	4.87272		0.00697341	0.0341861		5.5066	5.0804	5.142	5.1768	5.1373	4.4194	5.347	5.5975	4.3365	5.6919	5.5655	3.7253	4.4298	3.7489	3.8567	3.5472	4.8651	5.306	5.3388	4.003	4.0706	5.0222	4.6429	0	4.4714	5.2183	5.0178	5.0746	5.2953	5.9367	5.1647	4.1238	5.2246	4.2585	5.1824	5.0868	5.6785	4.7687	4.9316	4.8875
hsa-miR-5096		0.413182	2.46864	2.63235	2.85214		0.00373949	0.0211876		0	0	0	0	0	0	0	0	0	4.545	0	3.4737	2.9704	3.2725	3.0978	3.5472	3.7076	3.6056	3.6911	3.588	0	3.6071	0	0	0	0	0	4.5771	2.9448	2.5104	0	3.9014	3.5725	4.0659	4.2604	3.1233	3.9586	4.1837	0	3.266
hsa-miR-5100		0	3.55124	3.53732	2.64701		5.31278e-09	2.52921e-07		0	0	0	0	0	0	0	0	0	0	0	4.5077	3.7074	4.3035	3.3973	3.3479	3.7076	3.1906	3.7842	3.8961	4.3336	4.0222	3.3433	0	4.1759	4.7037	4.1151	5.0132	3.2079	3.0129	4.3871	0	3.2246	3.718	3.9193	3.6087	3.778	0	3.7252	2.8875
hsa-miR-510-3p		6.70109	7.12179	6.54039	8.98571		5.60403e-08	1.95363e-06		7.1099	6.7033	5.514	7.8492	6.2077	7.1393	6.6345	6.5975	7.3174	5.6919	6.9473	7.1952	5.4515	7.2919	6.2677	8.9048	8.1156	7.3267	8.2189	5.5355	7.771	6.7087	6.4373	7.798	6.6822	6.2421	6.4741	7.3225	6.6563	6.6119	5.1647	6.3825	7.5201	5.468	6.7539	7.3482	8.6492	9.096	7.8256	8.8625
hsa-miR-510-5p		0	0	0	1.29253		0.00303281	0.0181679		0	0	0	0	0	0	0	0	0	0	0	0	0	0	0	0	0	0	0	0	0	0	0	0	0	0	0	0	0	0	0	0	0	0	0	0	0	3.9207	0	0
hsa-miR-512-5p		0.310045	0.601114	0.3255	2.5803		0.000369715	0.00335013		0	0	0	0	0	0	0	0	3.4105	0	0	0	2.7074	0	0	0	0	3.1906	0	2.5176	0	0	0	0	0	0	0	0	0	0	0	0	0	3.5805	0	0	4.7291	3.4732	0	3.8135
hsa-miR-5189-3p		4.8524	2.78625	4.12293	4.40512		0.00242631	0.0156556		5.1281	4.3434	4.8619	4.7617	5.1373	5.0323	5.1175	5.0884	4.9466	4.4381	4.5211	4.439	0	2.8364	3.7192	2.6805	0	5.3605	3.2437	4.003	0	4.4145	4.6873	0	3.6234	4.5593	3.4984	5.4438	4.7928	3.0129	4.9721	4.3164	4.5725	5.2127	0	4.9713	4.6785	3.3357	4.9316	5.1803
hsa-miR-518b		6.03105	5.22517	5.58575	6.00721		0.00958636	0.0435901		6.2324	6.3908	6.8359	6.603	5.9853	5.2861	5.8742	6.0027	5.4461	6.164	5.5211	4.9641	5.0579	3.3927	5.2302	4.0193	5.6218	5.5363	5.3388	4.7193	6.0706	5.8035	5.8908	6.0902	5.4169	5.9838	4.9491	6.8647	5.5536	3.7328	6.006	5.871	5.2246	6.3671	5.5974	5.2932	6.4561	6.553	6.2535	5.8694
hsa-miR-532-3p		6.63235	7.57117	7.05566	6.99625		1.91705e-06	4.41449e-05		6.298	6.9911	6.4121	6.7617	6.1373	6.7913	6.6689	6.8474	7.0773	6.6684	6.3024	7.7432	7.4782	7.9777	7.4307	7.4228	7.4909	7.8344	7.5122	7.2401	7.9085	7.2606	7.4243	7.8698	7.403	7.9261	7.285	7.3965	6.7314	7.0904	6.6241	7.0713	6.731	7.0787	7.1622	6.5156	6.6525	6.2617	7.9847	7.3985
hsa-miR-532-5p		7.03081	8.28867	8.17925	7.96802		2.78745e-07	8.74563e-06		6.9147	6.9601	6.6984	7.0837	6.5158	7.4612	7.3888	7.3069	7.7324	6.6684	6.6085	7.8758	8.0508	8.9138	7.4085	8.5385	8.5921	8.9675	8.6577	8.2208	8.6735	7.506	8.0941	8.6509	7.8914	9.2858	8.4772	8.2775	7.5055	8.4392	7.3742	8.2937	8.0367	8.3775	8.2023	7.7022	7.6193	7.2806	8.3734	8.2521
hsa-miR-542-3p		7.16703	6.79083	6.46962	7.33136		0.00299014	0.0180414		7.0915	7.1508	7.4296	7.5343	7.1904	6.9758	7.2819	6.7279	7.0544	7.7711	6.6296	6.605	6.8367	6.2646	5.9519	8.2708	6.9379	6.065	6.7384	7.2618	6.8779	6.941	6.6087	7.1375	6.5744	5.669	6.7311	7.1478	6.0823	6.2742	6.2802	5.871	6.8737	5.468	7.1924	7.5761	8.1095	6.8718	6.5946	6.3858
hsa-miR-545-5p		1.55985	3.72111	3.71144	3.38979		0.00837289	0.0390631		0	0	0	0	0	0	5.1664	3.7099	3.6735	0	4.6085	2.7819	3.8449	4.5303	3.0978	3.5931	3.329	4.306	3.6911	4.5532	5.3336	0	3.2279	5.1833	4.6234	4.3114	4.0509	4.7376	3.2079	2.8323	4.9017	3.9014	0	4.5065	4.1824	4.1937	4.2634	0	3.8321	3.8875
hsa-miR-548a-3p		2.74037	4.16383	4.89094	2.82211		0.00399868	0.0224033		4.3911	0	4.755	4.4987	0	0	4.5074	3.7099	4.176	0	4.106	4.7538	4.5949	4.5038	4.7549	4.7428	4.177	4.1906	4.3078	4.5532	4.0706	3.8295	5.3433	0	4.4714	3.6333	4.801	6.1901	5.3233	4.7583	5.0392	4.6384	4.9351	5.6848	3.4719	5.3249	3.8711	3.4732	3.7252	4.4725
hsa-miR-548ad-5p		1.53545	4.07403	3.15656	3.25749		0.00249906	0.0159204		0	4.137	4.514	0	0	0	0	0	4.2585	0	3.9805	4.5733	2.9704	2.9968	4.3515	4.0849	3.8145	3.9979	3.2437	3.8395	5.2081	4.9764	4.1023	5.3533	3.5238	3.8964	4.1765	4.0746	3.7928	3.8796	4.1647	4.0169	0	0	3.5974	3.1233	3.4561	0	5.154	3.4725
hsa-miR-548ag		0.397864	2.37161	3.05981	1.25376		0.00194325	0.0130068		0	0	4.3765	0	0	0	0	0	0	0	0	2.4034	2.7074	0	3.7192	2.5931	3.5921	3.9275	0	3.003	0	3.7226	3.7304	0	3.8039	4.0118	3.0509	0	0	2.7328	4.2802	4.0169	3.3502	4.0659	4.2604	3.8888	0	0	0	0
hsa-miR-548ap-3p/548t-3p/548aa		6.13766	6.64872	6.15462	6.36067		0.00974072	0.0440526		5.9761	6.5863	6.4121	6.1768	5.9853	5.9758	6.2819	6.0319	6.4105	5.9471	5.7305	6.3943	6.2309	6.2881	6.4741	6.7927	6.255	6.4636	6.4281	6.5966	7.9775	6.4145	6.5255	7.9248	6.3164	6.4407	6.5573	6.8647	5.6453	6.0129	5.7892	6.3608	5.4656	6.2358	6.2792	6.0493	6.119	6.2036	6.9074	6.0891
hsa-miR-548ar-5p		0.333955	2.2005	2.89884	3.68972		5.41808e-05	0.000683386		0	0	0	0	0	0	0	0	3.6735	0	0	3.5409	3.2923	2.5562	3.2047	3.5472	4.0071	0	3.6911	0	0	3.3441	0	0	3.6234	0	3.5915	0	0	3.7328	4.5797	3.6384	3.6721	3.5805	4.536	4.5562	4.119	0	4.417	4.6949
hsa-miR-548as-3p		0.732236	2.60859	2.43375	3.86638		0.000787728	0.00631693		4.2656	0	0	0	0	0	0	0	3.789	0	0	3.1689	3.2923	3.2725	3.9823	4.6805	4.0071	0	3.4847	3.3656	0	0	3.2279	0	4.0384	0	4.2919	4.6596	3.2079	3.6259	0	3.6384	4.0131	0	3.3344	0	4.4561	4.1837	4.5483	3.4725
hsa-miR-548at-5p		0	1.87093	2.09619	2.14009		0.00932199	0.0424649		0	0	0	0	0	0	0	0	0	0	0	3.0814	2.9704	3.2725	3.2047	3.3479	0	0	0	3.3656	0	3.7226	3.2279	0	0	3.7708	2.9134	4.3965	0	3.449	0	0	0	4.346	4.1824	0	3.9586	0	4.4842	3.266
hsa-miR-548au-5p/548c-5p/548o-5p/548am-5p		5.35816	5.68814	5.54585	4.76133		0.000161571	0.00166206		5.3911	5.722	4.755	6.0837	5.1373	5.5414	5.617	4.9116	4.6121	5.4381	5.7305	5.5077	5.8284	5.8782	5.2553	6.2224	5.2925	4.4636	5.0322	6.2181	6.2081	6.2316	5.6653	6.1833	5.6472	6.1188	5.2919	4.8116	5.1465	5.3849	6.6883	5.9889	4.9351	5.3878	5.4048	5.8457	4.9155	4.0138	5.1122	4.7355
hsa-miR-548ay-3p		3.40482	2.37625	2.62224	4.54378		0.00929339	0.0424649		4.8061	4.4366	5.2244	0	0	3.9169	4.2595	4.0884	4.8959	5.8252	0	2.7819	2.9704	2.0708	2.9823	3.9506	4.177	3.7755	3.5916	3.4436	0	0	0	0	3.5238	0	3.0509	3.9491	4.5298	2.6259	3.9017	0	3.4656	0	3.8198	3.5018	4.778	5.6862	4.5483	4.653
hsa-miR-548ay-5p		1.42255	4.17399	0.972482	3.01258		1.23582e-05	0.000206794		0	0	0	0	0	3.7913	3.7189	4.2949	0	0	3.843	3.9883	3.6334	3.1412	4.2047	3.915	4.3994	2.9275	4.4281	3.3656	6.6066	3.8295	3.5498	6.2708	4.1759	3.7708	3.8394	0	0	0	0	0	3.0871	0	0	0	4.119	0	3.3466	3.3729
hsa-miR-548c-3p		0	2.33525	0.513291	2.27488		0.000208775	0.00206304		0	0	0	0	0	0	0	0	0	0	0	3.3293	4.1403	2.9968	3.2047	3.1166	0	3.065	0	0	4.9186	0	0	4.8838	3.0384	0	2.9134	0	0	2.7328	0	0	0	0	0	0	3.193	0	3.7252	4.266
hsa-miR-548l		1.99407	4.64439	4.53472	4.51305		2.1626e-06	4.93466e-05		0	4.137	4.755	0	0	0	4.7189	0	3.9955	0	4.3284	4.1258	4.4298	3.8782	5.012	5.4385	4.7076	3.413	4.7384	4.8104	5.0706	5.1096	4.6429	4.8838	4.7609	4.3114	4.1151	5.0746	4.0823	3.6259	4.6672	4.2233	4.7194	4.6508	4.6563	5.7556	4.5715	4.1837	4.1946	4.5656
hsa-miR-548y		1.13994	2.98331	4.12205	2.26236		0.000240546	0.00230447		4.3911	0	0	0	0	0	0	0	3.4105	4.7377	0	3.5409	2.9704	2.9188	3.6452	2.5931	4.329	3.413	4.0322	3.588	0	3.8295	3.7304	0	3.1759	4.4813	3.679	4.6596	4.2079	2.9254	4.3871	4.3164	3.6721	4.5065	4.1824	4.3249	3.778	0	0	3.3729
hsa-miR-550a-3p		1.08022	3.79473	3.09233	3.24141		0.000832568	0.00661312		0	0	0	0	4.2748	0	0	0	3.4105	4.1971	0	3.2513	3.4729	4.1412	3.4848	3.4004	4.0071	4.6931	3.5916	3.588	4.4491	3.4816	3.6429	4.5053	3.4169	5.5593	4.1765	4.297	3.3233	3.0954	4.5797	4.6384	0	4.346	0	0	3.3305	4.5988	3.8321	3.5656
hsa-miR-550a-5p		0	3.18256	1.84164	1.562		9.35519e-05	0.00108711		0	0	0	0	0	0	0	0	0	0	0	2.7819	0	3.6558	3.0978	3.2935	4.0071	3.8535	3.7842	3.8395	4.7486	0	3.5498	4.7683	3.1759	4.1188	2.9134	3.8116	3.3233	2.5104	0	0	0	3.5805	0	0	0	0	4.5483	3.1505
hsa-miR-552-3p		1.50247	5.12362	4.15112	4.65097		7.34107e-07	1.91938e-05		0	4.3434	0	0	0	4.1393	0	3.8474	0	4.1971	0	4.439	5.7605	4.1752	5.4417	5.321	6.651	5.065	6.3388	3.588	5.7486	4.8295	3.9648	5.8838	4.5238	0	3.8394	4.4896	3.5298	4.449	5.7497	5.0169	5.257	3.5805	5.1417	4.6087	4.8711	3.9207	3.8321	5.266
hsa-miR-554		2.32091	4.32068	4.51908	2.0205		7.17286e-05	0.000866726		0	4.137	5.142	0	0	0	3.5814	3.973	3.789	4.9076	0	4.4737	4.1928	4.1412	4.0412	3.1166	4.8651	3.9275	4.5916	3.8395	4.9966	4.8295	4.5971	5.3533	3.5238	3.7708	4.3464	5.8472	4.9083	3.6803	5.1033	4.2233	5.0506	4.2585	4.4719	4.0493	3.8711	3.3357	0	2.8875
hsa-miR-5583-5p		0	1.49854	3.20971	0.549508		2.87929e-05	0.000412972		0	0	0	0	0	0	0	0	0	0	0	0	0	0	0	2.178	3.5921	0	3.3692	3.7193	0	0	3.4502	0	4.6707	4.6333	4.3989	4.6596	3.6229	2.2474	4.0392	0	4.6232	3.959	0	3.1233	0	0	0	0
hsa-miR-5585-5p		0	2.21666	1.61534	0		0.000108798	0.00121371		0	0	0	0	0	0	0	0	0	0	0	2.9883	0	0	0	2.2935	3.4665	3.306	3.1062	3.3656	4.9966	4.5457	2.9648	0	0	3.6333	2.9134	4.1901	2.9448	0	0	0	4.0871	0	0	0	0	0	0	0
hsa-miR-5589-5p		2.06726	0.847921	0.633664	3.92111		4.3343e-05	0.000566619		0	5.1914	0	0	0	4.3319	0	3.7099	0	4.9856	4.5211	3.3293	0	0	0	0	0	0	0	0	0	3.3441	5.1975	0	0	0	3.4984	0	0	0	0	0	0	0	3.4719	0	3.8711	4.1013	3.3466	3.7355
hsa-miR-5690		0.365591	2.80095	2.26	1.89505		0.00763795	0.0366335		0	4.0215	0	0	0	0	0	0	0	0	0	3.2513	3.7074	2.9968	4.2047	2.6805	0	0	3.2437	3.6551	4.3336	4.4145	3.1023	0	3.6234	4.1188	3.3989	0	0	2.9254	0	0	3.3502	4.346	3.5974	3.1233	4.2634	0	0	0
hsa-miR-5692a		5.45415	3.77888	4.95405	4.37802		0.00156624	0.0112187		5.1984	5.4366	6.9125	6.3862	5.1373	4.5018	4.6518	5.9426	5.133	5.13	5.5655	4.439	4.1928	3.7489	4.4417	4.0525	3.4665	4.891	3.6911	4.622	0	5.0222	5.0352	0	5.3014	5.1694	4.8394	5.9159	4.8324	4.283	5.0392	5.3164	4.8945	4.6508	4.2604	5.2932	4.119	4.1837	4.6097	4.3205
hsa-miR-5701		4.65478	1.74421	2.65485	4.33038		0.000239695	0.00230447		4.1281	3.896	5.8094	5.6362	5.7696	3.6538	4.1664	4.388	4.548	4.4381	4.769	3.4034	3.9704	2.3339	0	3.178	0	3.5125	0	3.7193	0	0	0	0	4.3014	0	4.7208	0	3.5298	2.5104	5.1647	4.9603	0	4.4285	0	3.8888	3.4561	6.1837	3.4842	5.3469
hsa-miR-5704		0.393491	0	0	1.38266		0.00679447	0.0335051		0	0	0	0	0	0	0	0	0	0	4.3284	0	0	0	0	0	0	0	0	0	0	0	0	0	0	0	0	0	0	0	0	0	0	0	0	0	0	3.3357	0	3.3729
hsa-miR-5706		3.29149	3.90672	3.45501	1.27532		0.00175331	0.0122436		5.3297	0	4.514	4.9841	4.5158	3.6538	0	4.5579	0	4.3227	4.3284	4.3293	4.0859	2.9188	3.3973	3.0525	4.177	3.9979	3.7842	3.1957	5.141	4.1096	2.9648	5.5757	3.9644	0	4.2354	4.9491	4.2079	3.2474	4.7497	4.4039	4.1575	4.346	0	3.7082	3.4561	0	0	0
hsa-miR-5708		0	1.21659	2.5195	0.828467		0.00437048	0.0238476		0	0	0	0	0	0	0	0	0	0	0	0	0	2.9188	0	0	0	0	0	3.6551	0	4.1921	2.9648	0	3.3014	0	4.2919	4.3965	3.4303	2.6259	3.9017	0	4.3502	4.718	0	0	3.4561	0	0	0
hsa-miR-574-5p		7.33872	6.19878	6.55827	7.11042		6.04291e-06	0.000114043		7.4643	7.0804	8.2737	6.4622	7.3546	7.1263	7.4092	7.763	7.327	6.8252	7.64	6.3102	6.7164	6.0798	6.8811	5.915	6.4334	5.7954	6.3842	6.1264	5.793	6.1719	6.3433	5.7069	6.1259	6.1694	6.7104	6.9326	6.9716	6.4253	6.7696	6.7922	6.0871	5.5439	6.4218	7.3171	8.0609	8.5799	7.8765	6.4236
hsa-miR-576-3p		3.389	5.29896	4.99315	4.42376		0.00215807	0.0142923		4.2656	4.0215	4.3765	0	0	4.3319	4.4294	5.2949	4.6121	5.9471	0	5.0356	4.5949	5.2246	4.5672	5.2655	4.914	5.7954	5.2761	5.6051	6.3032	5.2701	5.0352	6.0902	5.2083	5.5593	4.8394	6.5982	4.2079	4.3849	5.3346	3.6384	5.3799	5.1654	4.7673	5.0493	3.5715	3.3357	4.8321	4.6949
hsa-miR-578		0	1.86016	1.9697	0.588408		0.00530977	0.0277233		0	0	0	0	0	0	0	0	0	0	0	3.0814	3.0859	0	0	2.178	0	2.9275	0	2.5176	0	4.7226	4.2279	0	3.3014	0	3.1765	4.297	2.9448	3.3178	0	0	4.0871	3.8435	0	0	3.4561	0	0	0
hsa-miR-579-5p		0.436918	1.7956	2.21806	4.23289		8.63245e-06	0.000150468		4.8061	0	0	0	0	0	0	0	0	0	0	3.0814	0	2.0708	0	0	0	3.7755	0	2.8961	4.3336	0	3.8908	5.0902	0	3.6333	3.9134	3.9491	0	2.2474	0	0	3.2246	3.959	3.4719	0	4.2634	3.5988	4.2726	4.653
hsa-miR-584-5p		10.4942	9.47844	9.99614	9.99173		1.70322e-05	0.000272297		10.899	10.158	10.548	9.6964	10.752	10.17	11.018	10.052	10.71	10.457	10.976	9.9159	9.5864	9.3534	9.6641	8.9746	9.2141	8.4636	9.3156	10.327	9.141	9.8801	10.134	9.0162	9.7122	9.6864	9.5915	9.4438	10.571	9.9746	10.594	9.562	9.9351	10.219	9.8751	10.505	10.309	10.424	10.656	9.5768
hsa-miR-589-3p		1.5301	3.12493	0.883364	2.69389		0.00791468	0.0375536		4.5066	4.137	4.514	0	0	0	0	0	3.6735	0	0	3.4737	2.7074	3.7489	0	3.8025	4.177	3.1906	3.5916	2.8961	4.3336	4.9764	2.9648	0	3.8864	0	3.1765	0	0	2.8323	0	0	0	0	0	3.7082	3.778	3.8212	3.9316	3.3729
hsa-miR-589-5p		5.21755	6.30666	6.1678	5.79362		1.90582e-07	6.29423e-06		5.0541	4.524	4.9614	5.7617	4.5158	5.5798	5.2137	5.1429	5.3365	5.1971	6.106	6.2513	6.1668	6.7262	5.6068	6.6858	6.499	6.278	6.5916	5.9372	6.5815	5.9048	5.9648	6.9907	6.1088	6.7708	6.1914	6.271	6.1621	6.7134	5.4866	6.3608	5.8945	5.7821	6.2023	6.0108	6.0209	5.5057	6.3466	5.7944
hsa-miR-590-3p		7.96484	8.33704	7.73956	7.56058		0.000221326	0.00216159		8.298	8.0804	7.796	7.5862	7.8154	7.9392	8.4738	7.8879	7.6584	7.9275	8.1504	8.4716	8.8346	8.9263	8.3162	9.6497	7.8463	8.0813	7.8611	7.9869	7.9966	8.212	8.1975	8.1141	8.2243	7.3114	7.801	6.3476	7.9892	8.1992	7.3742	7.9014	8.0826	7.8208	8.4512	7.8566	7.5853	7.2806	7.1946	7.5429
hsa-miR-604		4.11727	2.23727	2.53337	5.20156		4.82848e-05	0.000621513		4.3911	5.2439	4.514	5.4987	0	3.9169	3.9599	4.5579	3.548	4.4381	5.2215	3.2513	3.0859	0	3.7896	1.915	3.5921	4.1292	3.8717	0	0	4.2701	0	0	3.4169	0	3.9838	4.3965	3.6229	0	4.2802	0	4.1575	4.1654	0	3.2608	5.4257	5.5684	5.1946	5.3985
hsa-miR-605-5p		0	1.1383	2.24364	0		0.000596624	0.00502525		0	0	0	0	0	0	0	0	0	0	0	0	0	0	2.8567	2.4004	0	0	0	2.8961	0	4.6071	0	0	3.1759	0	3.9134	4.297	0	0	4.5797	0	3.8527	4.0659	0	3.9713	0	0	0	0
hsa-miR-606		0.332164	2.85971	2.03513	1.44195		0.00527658	0.0276497		0	0	0	0	0	3.6538	0	0	0	0	0	2.9883	2.8449	0	0	2.841	3.329	0	3.9542	3.5176	4.556	3.7226	3.8908	5.0902	3.3014	0	0	0	0	2.3849	3.9017	4.0169	4.3502	0	3.4719	4.2608	4.119	0	0	3.1505
hsa-miR-6068		2.9373	4.18071	4.53625	1.43433		3.83491e-05	0.000520304		0	4.2439	0	4.8772	0	4.7913	0	3.7099	3.789	6.5706	4.3284	3.8888	3.7074	3.3339	3.9209	3.6374	4.5921	4.2495	3.9542	3.7193	4.9186	5.0666	4.5971	4.6428	4.3014	4.3989	4.2919	5.9815	5.1148	3.2474	4.2802	3.6384	4.6721	4.6508	4.536	5.0868	0	3.7142	0	2.8875
hsa-miR-6081		2.17989	4.05208	5.36444	4.30866		0.000546979	0.00466979		0	0	4.514	0	0	3.6538	3.7189	0	3.6735	4.1971	4.2215	5.3668	5.0579	5.5038	3.8567	5.1629	4.0946	3.413	4.3078	4.0537	0	5.1096	6.2279	0	4.5744	4.1188	5.4495	5.4896	6.1307	4.9254	5.1647	3.9014	6.2246	5.2585	6.567	5.7786	5.515	4.8718	4.1122	4.61
hsa-miR-6124		2.14299	4.0252	4.31083	4.27839		0.00679303	0.0335051		0	0	4.9614	4.8772	4.5158	0	0	0	3.6735	5.545	0	4.9143	4.7074	2.4493	4.9519	3.5472	5.0071	3.306	4.1766	5.588	4.9186	4.4816	4.5009	0	3.8039	4.0118	4.4495	5.3476	3.8708	4.0129	4.0392	4.5644	4.6232	4.346	4.1824	3.9713	5.8935	4.6577	4.7796	4.2094
hsa-miR-6126		6.5653	7.89018	8.7231	7.62177		6.37442e-06	0.000117646		6.639	6.3908	6.3399	6.4622	6.4301	7.3206	5.9599	6.5579	7.0074	6.3227	6.7878	9.2274	6.9854	9.3225	6.9747	9.1351	8.2407	6.4258	8.1936	6.9372	6.53	8.1871	9.6259	6.8838	7.7933	7.7037	8.2281	9.0014	9.484	7.8621	8.2522	8.3333	9.811	8.5439	9.7757	8.9587	8.8282	7.2992	7.4426	6.3858
hsa-miR-6128		0	3.83334	3.4998	4.12292		4.26807e-12	4.28515e-10		0	0	0	0	0	0	0	0	0	0	0	4.2107	4.1403	3.6069	4.5266	3.6805	4.0946	4.2495	4.8286	3.4436	4.0706	4.5457	4.8523	0	3.4169	0	4.0509	4.5771	3.8708	4.2108	4.1647	4.4039	0	4.8435	4.1824	4.1937	4.119	4.1013	3.8321	4.3205
hsa-miR-6129		0.422236	2.04488	2.57376	6.02385		1.35768e-11	1.1751e-09		0	0	0	0	0	0	0	0	0	4.6446	0	3.3293	3.1928	2.9968	2.9823	3.3479	0	2.9275	3.1062	3.1026	0	0	3.6429	0	0	0	3.4984	4.3965	4.0152	3.0129	0	0	3.3502	3.5805	3.3344	3.1233	5.626	6.2992	5.7796	6.4844
hsa-miR-6130		4.13553	4.19265	4.5873	7.77341		2.11557e-15	4.08467e-13		5.0541	4.0215	4.514	0	4.9029	4.3319	4.7831	4.6359	3.789	4.545	4.9134	4.0356	4.3855	3.7489	4.5672	3.178	4.3994	3.7755	3.6911	4.3656	4.2081	5.3076	4.6429	4.5053	3.8864	3.6333	4.8769	5.297	4.4809	4.0547	4.9017	4.4039	4.3502	4.5805	4.8704	5.0108	7.6193	8.1118	7.2631	8.2556
hsa-miR-6131		1.53406	4.42614	4.06132	4.08472		2.74709e-05	0.000398566		0	0	0	0	4.1373	0	0	3.7099	4.3365	0	4.691	3.3293	4.0293	3.0708	3.9823	3.6374	4.0071	4.8535	4.5391	4.325	7.2405	3.9291	4.6429	6.5757	3.8039	4.1188	3.5915	5.297	4.0152	3.5104	4.9721	3.6384	4.2888	3.8435	4.0125	3.3863	4.6785	0	5.0247	4.2094
hsa-miR-6133		1.50068	2.67121	2.95437	4.60882		0.000512036	0.00441653		0	0	4.6395	0	0	0	0	3.973	3.789	0	4.106	3.7819	2.8449	2.2083	0	2.841	3.914	4.1292	3.7842	2.7807	0	4.3441	2.9648	0	3.8039	4.1188	0	5.534	3.4303	2.9254	4.2802	0	4.5201	3.718	0	3.9713	4.3947	4.8718	4.5483	4.5198
hsa-miR-6134		6.89792	5.5153	5.79755	6.20573		6.77035e-11	5.14957e-09		6.9559	7.2439	7.4808	6.8206	7.0249	6.5018	7.001	6.6548	6.176	6.715	7.3024	5.5572	5.7948	5.6558	5.7896	4.9329	5.5307	5.5363	5.6171	6.003	4.9186	5.9764	5.5736	4.8838	5.4444	5.7708	5.9838	5.9815	5.4809	5.6534	5.709	5.6384	5.9149	6.3029	5.536	5.8014	5.2634	6.2992	5.8061	6.9406
hsa-miR-617		0	0.236143	0	2.14467		2.20494e-05	0.000335417		0	0	0	0	0	0	0	0	0	0	0	0	0	0	0	0	0	3.306	0	0	0	0	0	0	0	0	0	0	0	0	0	0	0	0	0	0	4.041	4.4061	0	0
hsa-miR-619-3p		1.54222	1.51429	2.51802	4.13019		0.000983084	0.00756915		0	0	0	4.6362	4.1373	0	0	4.1954	3.9955	0	0	3.8888	0	0	2.8567	2.2935	3.8145	0	3.6911	0	4.6555	0	0	0	0	0	2.9134	4.6596	3.7104	2.2474	0	0	3.3502	3.8435	3.4719	3.5018	4.3305	4.1837	4.5483	4.3729
hsa-miR-621		3.96312	0.880821	0.267709	2.24906		2.52052e-06	5.4739e-05		4.9761	0	5.142	4.7617	4.1373	4.7242	3.7189	4.2949	3.6735	4.3227	3.843	2.9883	0	0	0	0	0	3.065	0	0	0	0	3.1023	0	3.1759	0	0	0	2.9448	0	0	0	0	0	0	0	3.6785	0	3.6097	5.1505
hsa-miR-624-5p		2.31002	4.74629	3.94548	2.83359		0.00340045	0.0196662		4.713	4.0215	4.514	0	0	3.7913	3.9599	0	4.4105	0	0	4.8093	4.8117	5.7823	4.6452	5.0849	4.8145	4.8535	4.2437	4.5176	5.2081	3.4816	4.7722	5.7069	3.7165	4.835	4.6359	5.1335	4.0823	4.0954	4.1647	4.3164	0	4.346	4.4048	3.3863	3.778	0	3.9316	3.653
hsa-miR-627-3p		0.375282	3.2134	3.1476	1.79903		0.000131684	0.00143069		4.1281	0	0	0	0	0	0	0	0	0	0	3.7253	3.7074	3.3339	3.5672	3.7223	4.3994	3.6056	4.0322	3.9506	0	3.8295	3.8128	0	3.3014	3.6333	3.4984	4.6596	4.0152	2.7328	0	0	4.3502	3.8435	3.9193	3.9713	3.5715	0	4.3466	3.025
hsa-miR-628-3p		8.42545	7.70764	7.44798	8.29253		1.03894e-08	4.82917e-07		8.3218	8.116	8.4639	8.188	8.2911	8.2744	9.0144	8.2828	8.5274	8.4992	8.701	7.8823	7.7991	7.4389	7.9519	8.4291	7.84	6.9806	7.8011	8.0127	7.158	8.177	7.5071	6.9647	7.9644	6.9979	7.4619	7.5877	7.6782	7.6568	7.9721	6.871	7.1915	7.3671	7.4719	7.6717	7.9372	8.4567	7.9376	7.8739
hsa-miR-629-3p		6.63188	6.64436	6.42828	7.76387		3.40271e-07	1.02901e-05		6.0541	6.7403	7.3583	7.1075	6.5703	6.5414	5.9319	6.8474	6.4284	7.0952	6.2759	6.3668	6.3855	5.7376	6.4307	6.0688	6.762	6.306	6.934	6.5444	8.0885	6.592	6.3294	7.9907	6.4846	6.7543	6.2354	7.1621	5.7726	6.2383	6.557	6.84	6.409	6.0399	6.5974	6.1051	8.056	7.2992	8.8191	7.7204
hsa-miR-629-5p		9.58139	9.27846	9.31305	10.0553		0.0006526	0.00539032		9.353	9.3761	10.066	9.8633	9.1508	9.6242	9.2396	9.7099	9.8045	9.854	9.3539	8.9778	9.013	9.0538	8.8485	9.4803	9.5365	8.8747	9.5274	9.3454	10.254	8.8035	8.7009	10.313	9.1697	10.277	9.2657	9.9243	8.6863	9.1434	9.3279	9.6042	9.1575	8.9024	9.1392	9.0157	10.026	9.5077	11.496	9.7317
hsa-miR-640		0	0.179829	0.577082	3.12173		2.23768e-09	1.17012e-07		0	0	0	0	0	0	0	0	0	0	0	0	0	0	0	0	0	0	0	2.5176	0	0	0	0	0	0	0	0	0	0	0	0	3.2246	0	0	3.1233	3.8711	3.5988	0	3.8135
hsa-miR-643		0	2.00551	1.00532	0.501608		0.00849382	0.0394076		0	0	0	0	0	0	0	0	0	0	0	2.6664	2.7074	2.9968	0	3.5472	0	0	0	0	4.9966	3.4816	0	4.6428	3.0384	4.1188	3.0509	0	0	0	0	0	0	0	0	3.8888	0	0	0	3.1505
hsa-miR-6501-5p		0	3.23419	1.23605	0.895383		7.53684e-06	0.000135125		0	0	0	0	0	0	0	0	0	0	0	4.9641	3.7074	2.6558	3.9823	2.841	3.7076	3.7755	3.8717	3.588	0	4.4816	4.2867	0	3.4169	0	2.9134	0	3.7928	3.3178	0	0	3.5725	0	0	0	0	0	0	0
hsa-miR-6505-3p		1.46618	3.03858	2.03342	3.92333		0.00259407	0.0163596		0	0	4.3765	0	0	0	3.8445	3.8474	0	4.0596	0	3.7253	3.3855	3.1412	3.6452	2.841	3.4665	3.413	3.4847	4.003	0	4.666	2.9648	0	3.8039	4.4813	3.4984	0	0	2.8323	0	0	3.4656	0	3.3344	4.7556	3.778	3.7142	3.3466	3.7355
hsa-miR-6508-3p		0	0	0.280645	1.81299		0.000228205	0.00221157		0	0	0	0	0	0	0	0	0	0	0	0	0	0	0	0	0	0	0	0	0	0	0	0	0	0	0	0	0	0	0	0	3.0871	0	0	0	0	3.7142	0	3.8135
hsa-miR-6511a-3p		0.728818	2.65056	2.39443	3.21009		0.00977377	0.0441226		0	4.0215	0	0	0	0	0	0	3.9955	0	0	4.0356	3.6334	3.8782	2.8567	3.6805	0	4.306	3.4847	3.7807	0	0	4.0352	0	3.4169	4.8964	3.5915	0	0	3.3849	3.9017	0	0	3.8435	3.3344	3.3863	3.4561	3.7142	0	3.8875
hsa-miR-6515-5p		0.822964	1.95684	2.49154	4.12393		0.000373262	0.00335802		0	0	0	0	0	3.7913	0	0	0	5.2613	0	0	0	2.2083	3.0978	0	0	3.306	0	2.7807	4.0706	4.0222	3.5498	0	4.3603	3.8964	4.1765	5.4438	3.7104	2.8323	0	0	4.0131	0	3.3344	0	4.8711	4.8212	3.8321	5.3205
hsa-miR-652-3p		5.65746	6.51958	6.47484	5.48039		4.02655e-07	1.14848e-05		5.6641	6.137	5.142	5.3467	5.2748	5.6538	6.3256	5.1429	5.176	5.7821	6.5871	5.636	6.525	7.4248	6.8892	7.0525	6.607	7.0975	6.6911	6.5176	5.9186	6.4145	6.4243	5.8838	6.1922	6.7208	6.3859	6.6596	6.8613	6.7647	6.5797	6.4457	6.3945	5.931	6.0348	6.4452	5.2974	4.7142	4.9316	5.7944
hsa-miR-660-5p		7.39732	8.98821	9.56201	8.1159		4.42294e-17	1.58594e-14		7.2656	7.524	6.9372	7.4987	6.9447	7.7665	7.5356	7.8958	7.8435	7.13	7.0289	8.6109	9.4037	9.3451	8.9615	9.0235	9.0405	9.6541	8.8611	9.1026	9.0201	8.3753	8.926	9.0902	8.4204	10.197	9.7169	9.8002	9.2811	9.7631	9.0676	9.7131	9.3614	10.055	9.0181	9.2086	7.9848	7.2899	8.8061	8.025
hsa-miR-663a		0.862973	3.3736	3.2212	2.04907		0.00171494	0.0120913		0	0	4.755	0	0	0	0	0	0	4.7377	0	3.605	3.8449	3.1412	4.0978	2.763	3.5921	3.413	3.4847	2.7807	0	4.8295	3.5498	4.5053	3.6234	0	3.9838	4.1901	3.3233	3.0954	4.7497	0	4.7194	3.8435	3.9193	3.6087	3.9586	4.2617	0	3.7355
hsa-miR-664a-3p		5.50811	4.82339	5.18573	4.71658		0.000193604	0.00194378		5.713	5.7941	5.9125	5.1768	5.4593	4.7242	5.8742	5.9116	5.176	5.867	4.9805	4.3668	5.2681	4.5818	4.7896	4.9329	5.0515	4.891	4.5916	4.622	4.7486	5.1096	4.3433	4.9907	5.24	4.9553	5.2919	6.0442	4.9804	4.5104	4.3871	5.2233	5.7652	5.6161	4.7673	5.5018	4.9155	5.1837	3.7252	4.9231
hsa-miR-664a-5p		7.79505	7.09754	7.27336	7.81591		1.22683e-06	2.98964e-05		7.4643	7.9204	7.997	7.5691	7.8488	7.7582	7.8594	7.6826	7.7033	7.7489	8.1935	6.6437	7.1928	6.5944	7.1721	7.3972	7.7418	6.2055	7.6669	7.54	7.0706	7.4484	6.4502	7.2494	6.9926	6.5012	7.1151	7.4669	7.8708	6.9534	7.591	7.0169	7.4726	7.0659	7.3253	7.6279	7.8541	8.1937	7.8702	7.7701
hsa-miR-664b-5p		5.19395	2.97952	3.92407	4.59479		0.000165656	0.00169713		5.8061	4.6845	4.9614	5.3467	5.5703	5.3763	5.1664	4.4755	4.9955	5.3227	5.428	3.8363	2.9704	3.1412	3.4848	3.5931	4.7076	4.1292	4.1062	3.3656	0	4.4145	0	0	3.9644	0	4.2354	5.1901	4.5298	3.0954	4.3871	4.2233	4.4656	4.2585	4.3344	4.4452	4.626	5.5684	4.417	4.8135
hsa-miR-665		0	1.92165	1.92656	0.79305		0.00473789	0.0254649		0	0	0	0	0	0	0	0	0	0	0	3.6664	2.9704	2.0708	0	1.915	0	3.6931	0	2.5176	0	3.9291	3.1023	0	3.0384	0	3.0509	4.4896	3.2079	3.0954	0	3.7759	3.5725	0	0	0	0	0	0	0
hsa-miR-6716-5p		0	0.136786	0	1.19467		0.00783626	0.0372519		0	0	0	0	0	0	0	0	0	0	0	0	0	0	0	1.915	0	0	0	0	0	0	0	0	0	0	0	0	0	0	0	0	0	0	0	0	0	0	0	0
hsa-miR-6720-3p		2.44175	4.52372	4.59119	3.86885		0.00232351	0.0150698		5.2656	4.2439	0	5.6362	0	0	0	0	3.6735	4.0596	3.9805	3.5409	4.7074	3.7489	4.1522	3.3479	4.651	4.5125	4.5391	4.0537	5.4491	5.666	5.0692	5.2708	4.6234	4.7037	4.7614	5.534	4.4303	3.7328	5.3346	4.3164	5.6232	3.5805	3.5974	4.8888	5.0806	4.3357	3.7252	4.025
hsa-miR-6720-5p		0.79	3.04481	2.88967	1.45806		0.00354823	0.0203176		0	0	5.142	0	0	0	0	0	3.548	0	0	2.4034	3.1928	2.5562	3.3973	2.2935	3.7076	3.1906	3.3692	2.6551	4.0706	4.0222	3.7304	0	4.0384	0	3.5915	5.1335	3.4303	0	3.9017	0	4.0131	3.5805	4.0125	4.1233	0	0	0	2.8875
hsa-miR-6727-3p		0.672045	0.616686	1.08039	3.40494		3.44489e-05	0.000472495		0	0	0	0	0	0	3.8445	0	3.548	0	0	2.9883	0	0	0	2.6805	0	0	0	0	0	0	2.9648	0	0	0	0	4.1901	3.7928	0	0	3.9014	0	0	0	0	3.9586	3.5988	3.3466	3.266
hsa-miR-6727-5p		0.501273	3.01186	3.09025	1.79118		0.00747226	0.0359732		0	0	5.514	0	0	0	0	0	0	0	0	3.4737	0	2.0708	3.0978	2.4999	4.0946	7.6717	4.2437	3.003	0	4.1921	4.6429	0	3.1759	4.4813	3.9838	5.0746	4.3233	5.2653	0	0	3.3502	0	3.7129	3.8014	3.8711	3.8212	0	0
hsa-miR-6728-5p		0.761891	0.567629	2.62552	2.80339		0.000742979	0.0060352		0	0	0	0	4.2748	0	0	0	0	0	4.106	2.5409	0	0	0	2.178	0	0	0	0	0	0	3.2279	0	0	3.8964	3.1765	4.0746	3.5298	2.2474	0	0	4.2888	4.1654	0	3.5018	3.5715	3.4732	0	4.9231
hsa-miR-6729-3p		6.5708	5.10455	5.80934	6.33302		2.28727e-08	9.12459e-07		6.7603	6.3908	7.1838	6.9581	6.9652	6.2861	6.1175	6.3653	5.9712	6.715	6.5655	5.2107	5.0293	3.9583	5.7549	3.763	5.3994	5.1602	5.4567	5.1957	5.4491	5.0222	5.709	5.3533	5.0019	6.2421	5.0834	6.5982	6.1621	4.4173	6.4377	6.1493	6.0131	5.6161	5.4048	5.7786	6.471	7.0799	6.5005	6.5543
hsa-miR-6732-5p		0.369055	0.354507	2.18371	0.310017		0.00836598	0.0390631		0	0	0	0	0	0	0	0	0	4.0596	0	0	0	0	0	0	0	4.9631	0	0	0	0	0	0	0	0	0	4.6596	4.3233	0	4.0392	0	3.5725	3.718	0	3.7082	0	0	0	0
hsa-miR-6733-3p		0.310045	1.95094	3.58202	3.50707		3.36831e-06	6.87354e-05		0	0	0	0	0	0	0	0	3.4105	0	0	3.1689	0	0	0	2.0525	0	3.1906	0	2.8961	0	3.7226	3.8908	4.7683	3.6234	0	3.5915	4.7376	4.2079	2.3849	4.9721	4.1238	3.7652	4.2585	4.0999	3.2608	4.8253	4.1013	0	3.025
hsa-miR-6734-3p		1.15923	2.11921	3.83848	2.94204		0.00269133	0.016709		0	0	0	0	0	0	3.8445	3.7099	0	5.1971	0	2.8888	2.8449	2.9188	3.4848	3.4999	0	3.065	3.4847	3.4436	0	0	0	0	4.0384	4.0118	3.9134	4.0746	3.7928	3.0129	4.3871	4.0169	3.9351	3.718	4.0999	3.2608	4.9155	3.9207	3.4842	4.653
hsa-miR-6738-5p		0	1.46593	2.61561	1.22297		0.00456014	0.024668		0	0	0	0	0	0	0	0	0	0	0	3.0814	2.9704	0	2.9823	0	0	3.6056	3.9542	0	0	3.9291	0	0	0	3.6333	0	5.1901	2.9448	2.2474	3.9017	0	3.0871	3.718	0	4.0493	0	3.5988	0	4.0891
hsa-miR-6743-3p		4.99945	3.62508	4.82788	4.9902		0.00452775	0.0245457		5.5066	4.6845	5.142	5.5691	4.2748	4.3319	5.2595	5.2949	5.3365	4.8252	4.769	3.605	4.2434	2.9968	4.3515	2.5931	4.9613	4.7349	4.6911	4.5532	0	4.8801	3.9648	0	5.1759	5.2656	5.3194	6.0746	4.6229	3.2474	5.6241	4.2233	5.8313	5.3029	3.3344	4.2608	5.3947	5.1013	5.1946	4.775
hsa-miR-6747-3p		1.25709	3.74054	3.67219	3.80612		0.000390135	0.00349728		0	0	4.8619	0	0	0	0	0	0	4.9856	3.9805	3.8363	4.0293	3.7933	3.6452	4.0193	4.5307	2.9275	4.3078	3.9506	5.0706	0	3.2279	4.9907	4.0384	3.7708	4.2354	5.534	3.5298	3.0954	0	4.0169	4.5201	3.718	3.7129	4.2608	4.7291	4.1837	4.9316	4.2094
hsa-miR-6751-3p		0.6791	1.1788	0	2.39112		0.0031373	0.0184858		0	0	0	0	0	0	0	0	3.4105	4.0596	0	2.5409	0	0	0	2.2935	3.914	0	4.0322	0	0	3.7226	0	0	0	0	0	0	0	0	0	0	0	0	0	0	3.778	3.3357	3.7252	3.9579
hsa-miR-6752-3p		0.803836	1.33251	2.94088	2.92818		0.00282291	0.0173634		0	3.7585	0	5.0837	0	0	0	0	0	0	0	2.6664	3.2923	0	3.5672	2.2935	3.4665	0	3.3692	0	0	0	0	0	0	3.6333	2.9134	4.297	3.7104	2.8323	4.3871	0	0	3.718	3.4719	3.3863	3.193	3.5988	3.9316	3.266
hsa-miR-675-3p		0.392973	3.23797	4.15115	1.39746		5.8138e-05	0.000724762		0	0	0	0	0	0	0	0	0	4.3227	0	0	2.9704	2.3339	2.8567	3.2935	4.8145	3.9979	5.0697	5.1264	0	4.7771	4.0352	0	6.0563	0	5.6576	6.534	4.8708	0	5.4866	4.4039	5.3799	5.931	3.5974	3.8014	3.193	0	0	3.1505
hsa-miR-6754-3p		0	0.4016	0.359009	1.78706		0.00541798	0.0281556		0	0	0	0	0	0	0	0	0	0	0	0	2.7074	0	0	2.915	0	0	0	0	0	0	0	0	0	0	0	3.9491	0	0	0	0	0	0	0	0	3.8711	3.4732	0	3.266
hsa-miR-6756-3p		6.5161	5.31264	5.76914	6.74733		1.65106e-08	7.024e-07		6.7369	6.3192	6.8619	6.9316	6.3073	6.3763	5.5814	6.5173	6.3174	7.0775	6.6503	5.6206	5.5554	4.2083	5.7011	4.3744	5.2166	4.8535	5.4847	5.9771	5.2081	6.251	5.709	4.6428	5.5744	5.3558	6.3057	6.4438	5.4043	4.5402	6.2802	4.7759	6.3799	6.3029	5.8704	5.8014	7.0708	7.1118	6.8702	6.9665
hsa-miR-6757-5p		3.45725	4.01681	5.00515	2.29256		0.00508173	0.0269096		5.0541	4.6065	5.2244	5.1768	4.2748	0	4.2595	0	4.789	4.6446	0	4.3668	3.7778	2.6558	3.9209	3.2369	4.255	4.9979	4.5916	4.9506	4.0706	5.4145	4.3978	0	5.5991	4.7037	5.2062	6.8295	5.3778	3.6259	4.9721	4.4039	5.8096	5.6848	3.4719	4.9713	4.8711	0	4.0247	4.025
hsa-miR-676-3p		3.32378	4.67581	5.06736	1.5569		2.78927e-06	5.88325e-05		0	0	5.0545	5.1768	4.1373	3.7913	4.347	0	4.3365	5.1971	4.5211	5.1899	4.3855	3.3927	4.9823	3.1166	5.3647	4.7755	5.0322	3.7807	5.7028	4.8295	5.1023	5.5053	4.3014	5.4813	5.1151	6.2175	5.1775	4.4173	5.7497	4.6384	5.1227	5.1654	4.0999	4.5562	3.6785	0	0	0
hsa-miR-6769b-3p		6.29925	4.40857	5.21508	6.46609		6.69234e-07	1.787e-05		6.7603	6.6065	7.2244	6.4622	6.1008	5.8555	5.2137	6.1429	5.8165	6.8874	6.2215	4.8628	4.6334	4.4493	5.1787	3.8785	5.329	5.278	5.2105	4.622	4.3336	4.4816	5.2867	0	4.1759	4.7708	5.679	6.4896	5.6002	4.5979	5.4866	4.3164	5.6959	5.1165	4.7673	4.8457	7.289	7.0025	6.5639	6.5081
hsa-miR-6770-3p		0	0.946736	2.19047	0.300508		0.00452599	0.0245457		0	0	0	0	0	0	0	0	0	0	0	0	0	0	0	2.178	0	0	0	0	0	3.9291	3.3433	0	3.8039	3.6333	3.2919	4.8116	0	0	5.1647	0	3.3502	3.8435	0	0	0	0	0	0
hsa-miR-6771-3p		1.54068	3.49386	3.49355	2.45557		0.00559377	0.0289492		4.1281	4.137	0	0	4.6228	0	0	0	0	4.0596	0	3.4737	3.0859	2.0708	3.2047	2.841	3.8145	3.5125	3.3692	3.003	4.556	4.2701	3.6429	4.7683	3.3014	0	3.9134	4.6596	3.7928	2.6259	4.3871	3.9014	4.3502	4.0659	3.4719	3.2608	3.193	3.3357	0	2.8875
hsa-miR-6771-5p		0.366573	1.95077	1.38427	3.0474		0.0059872	0.0304807		0	0	0	0	0	4.0323	0	0	0	0	0	3.0814	0	2.6558	0	2.4004	4.4665	4.1906	3.4847	0	0	3.4816	3.5498	0	0	0	3.5915	4.3965	0	0	0	0	3.3502	0	0	3.8888	3.778	0	3.9316	4.0891
hsa-miR-6773-5p		0.421473	1.78346	2.80976	0		8.16316e-05	0.000962475		0	0	0	4.6362	0	0	0	0	0	0	0	2.4034	0	2.3339	4.0978	2.763	0	0	0	2.8961	0	3.8295	3.2279	0	3.4169	0	4.5457	5.0746	3.7104	2.9254	0	0	3.8527	3.718	3.8198	3.2608	0	0	0	0
hsa-miR-6774-5p		0	1.98801	1.36489	0.240625		0.00125067	0.00926015		0	0	0	0	0	0	0	0	0	0	0	0	3.1928	0	2.7192	1.915	3.5921	3.065	3.4847	0	0	3.3441	3.1023	0	3.4169	0	0	4.5771	3.5298	0	0	0	3.5725	0	3.3344	0	0	0	0	2.8875
hsa-miR-6779-3p		0.392973	2.86098	3.9309	2.56644		0.000209592	0.00206304		0	0	0	0	0	0	0	0	0	4.3227	0	2.9883	0	2.3339	3.6452	3.2935	3.914	3.7755	3.7842	3.1957	4.9186	0	3.9648	0	4.24	4.3114	4.8769	5.3965	4.1465	0	3.9017	4.0169	4.6721	3.5805	4.536	3.8014	4.7291	5.7417	0	4.3729
hsa-miR-6780a-3p		0	2.46911	1.45233	2.11649		0.00343612	0.0198268		0	0	0	0	0	0	0	0	0	0	0	3.5409	3.9704	2.6558	3.4848	2.9854	0	0	3.3692	3.9506	0	4.0222	3.5498	0	3.0384	0	0	4.8116	0	0	0	0	3.7652	0	3.5974	3.8014	3.9586	0	3.6097	2.8875
hsa-miR-6781-3p		0.828464	0.688664	0.546591	3.06765		0.000978764	0.00755907		4.5066	4.6065	0	0	0	0	0	0	0	0	0	0	0	0	0	2.4999	0	0	3.1062	0	0	0	4.0352	0	0	0	0	0	0	2.9254	0	0	3.0871	0	0	0	3.778	4.3357	3.8321	4.3205
hsa-miR-6781-5p		5.06135	5.25732	5.81694	3.79251		4.35988e-06	8.61678e-05		5.3911	4.7585	6.264	5.8772	5.0633	3.9169	3.8445	5.0319	5.4809	5.4381	4.6085	5.1475	5.2923	4.2407	5.4634	4.6154	5.329	5.2495	5.2105	4.7193	5.6555	5.8551	5.7926	5.2708	5.7609	6.1188	5.6359	7.2311	6.3644	5.1543	5.8651	4.84	6.2888	5.6161	5.37	5.5018	4.778	4.4732	4.5483	3.7355
hsa-miR-6785-3p		5.29885	3.26445	4.09821	4.99702		0.000262887	0.00247133		4.8936	5.481	5.5781	5.4247	5.0633	5.0323	4.9599	5.4755	5.133	5.867	5.379	4.0356	3.6334	2.6558	3.4848	2.763	4.5921	3.306	4.3692	4.1026	0	4.4816	4.1023	0	4.1759	0	5.4495	5.534	4.7522	3.0129	4.8277	3.9014	4.8096	4.9024	3.3344	4.5562	5.2974	5.5057	4.1122	5.3205
hsa-miR-6792-5p		4.21463	1.50898	2.44706	3.93204		7.6391e-05	0.000908727		4.9761	5.2945	0	5.0837	4.9853	4.4194	4.1664	3.8474	4.548	5.0596	3.9805	3.4737	2.9704	2.2083	0	2.4004	0	0	3.1062	0	0	0	3.5498	0	3.4169	3.8964	0	4.7376	3.6229	2.9254	4.0392	0	3.8527	3.8435	0	0	3.778	3.9207	3.6097	4.1505
hsa-miR-6793-3p		0.510191	2.38064	0.698845	2.46018		0.0063499	0.0320045		0	0	0	0	0	0	0	0	5.6121	0	0	3.0814	0	3.0708	0	3.5472	3.8145	3.065	3.6911	2.5176	0	3.7226	3.6429	0	3.1759	0	0	0	3.5298	0	0	0	4.1575	0	0	0	3.8711	0	0	3.3729
hsa-miR-6794-3p		4.78422	2.93551	4.24154	4.51477		0.000209016	0.00206304		4.8936	4.7585	5.3025	5.4247	5.5158	4.5798	4.0668	3.8474	3.9955	5.2613	4.9805	3.5409	3.4729	2.5562	0	2.5931	4.914	3.9979	4.4847	3.588	0	4.4816	4.1665	0	3.3014	4.6333	4.2919	4.8116	4.0823	3.2474	4.6672	3.6384	4.9746	3.5805	4.4048	4.3249	4.8253	4.7687	4.4842	4.7355
hsa-miR-6800-3p		4.05689	4.38708	5.09088	2.4921		0.000604435	0.00505711		4.8936	4.137	4.755	0	4.4004	4.4194	4.0668	4.0884	4.6121	4.6446	4.6085	5.1689	4.7778	4.3035	4.7192	3.9506	4.8145	5.1292	4.4281	4.3656	4.0706	5.5768	5.6429	0	4.4714	5.2183	4.5457	6.3965	5.7928	4.3849	5.4866	3.7759	5.0871	5.2585	4.9666	5.0868	3.5715	0	0	3.9579
hsa-miR-6801-3p		0	4.68514	4.88748	1.53327		9.15339e-16	2.2975e-13		0	0	0	0	0	0	0	0	0	0	0	4.636	4.5949	4.3636	5.3515	3.2369	4.8651	5.2495	4.6422	4.8961	4.4491	5.4145	4.5009	4.5053	4.8864	4.9553	4.679	5.3476	5.7104	4.0547	5.5339	4.0169	5.3799	4.4285	4.7673	4.8888	0	3.5988	0	0
hsa-miR-6802-5p		5.00564	3.65819	4.81143	5.07675		0.00172558	0.0120984		4.8936	5.0215	5.5781	5.8772	5.5158	4.7242	4.347	4.0884	5.298	5.1971	4.5211	4.5077	4.5147	3.2083	4.0412	3.2369	4.329	4.7349	4.4281	4.4436	0	4.666	4.9283	0	4.1759	4.1188	5.0509	5.6991	5.2376	3.6803	5.0392	4.9603	5.257	5.0134	4.2604	4.6087	5.3947	5.3714	4.9789	4.9231
hsa-miR-6804-3p		0	4.04561	4.69802	0.794017		6.00674e-15	1.00513e-12		0	0	0	0	0	0	0	0	0	0	0	4.5733	3.7778	4.3035	4.6452	4.1166	5.1364	3.7755	5.3078	3.5176	0	3.3441	5.5971	4.5053	4.0384	4.4813	3.9134	5.9159	5.2079	4.1734	3.9017	4.4864	5.3198	5.3878	4.3344	4.5562	0	0	0	3.4725
hsa-miR-6804-5p		0.732282	0.747886	0.267709	2.5539		0.00192247	0.0129368		0	0	0	0	0	0	0	0	3.4105	4.6446	0	0	0	0	0	0	3.329	0	3.5916	0	0	0	3.5498	0	0	0	0	0	2.9448	0	0	0	0	0	0	0	3.3305	4.0138	3.6097	2.8875
hsa-miR-6812-5p		5.47227	4.48401	5.20244	4.69637		0.00320394	0.0187457		6.0156	4.896	6.0989	5.2642	5.9447	4.7913	5.3888	5.3422	5.3365	5.5957	5.5211	4.5409	4.1403	2.2083	4.0978	3.4999	5.4665	4.306	5.3692	3.9506	5.3336	4.8801	4.5498	4.8838	5.5494	5.3114	4.7208	6.2175	4.0152	4.1734	5.9721	5.6019	5.1227	5.5065	5.2604	5.3249	5.041	5.0582	5.3823	5.4236
hsa-miR-6813-5p		1.12622	3.102	4.08925	3.59439		0.000275284	0.00257822		0	0	4.755	0	0	0	3.9599	0	3.6735	0	0	2.7819	2.9704	2.4493	3.9209	3.6374	3.7076	3.413	3.1062	4.1499	0	5.2316	3.6429	0	4.4169	0	4.1765	5.6189	4.6673	3.7328	4.2802	3.9014	5.4656	4.1654	4.4719	4.5018	4.4561	4.0138	3.9316	5.0574
hsa-miR-6815-3p		0.776627	0.387264	0.675773	2.7111		0.00119729	0.00891338		0	0	4.3765	0	0	0	4.1664	0	0	0	0	0	0	0	0	2.178	0	0	3.2437	0	0	0	0	0	0	0	3.7614	0	0	0	0	0	3.6721	0	0	0	3.6785	3.3357	3.4842	4.3205
hsa-miR-6819-3p		6.08865	5.27276	5.75495	5.14679		0.00152407	0.0110242		6.5066	6.0804	6.6395	6.131	6.4878	5.2861	5.8141	5.5975	6.0428	6.6203	5.769	5.3668	5.2923	3.9583	5.5672	4.1166	5.9613	4.9979	5.4847	4.3656	5.5035	5.8035	6.3978	5.6428	5.3603	5.4407	5.6359	7.0442	5.6229	4.6259	6.3871	4.9014	5.9149	6.0659	6.0568	5.6087	5.4257	5.4401	5.3823	5.1505
hsa-miR-6822-3p		0.392973	1.98153	3.14739	2.16714		0.00495185	0.0263888		0	0	0	0	0	0	0	0	0	4.3227	0	2.7819	3.1928	0	0	0	0	3.9275	3.4847	3.1026	0	4.0222	3.8128	0	3.4169	4.1188	3.7614	4.9491	2.9448	0	4.1647	3.7759	3.3502	3.8435	3.7129	0	3.4561	0	0	0
hsa-miR-6823-3p		1.95867	3.60179	4.70805	4.20633		0.00193362	0.012977		4.2656	4.3434	0	0	0	3.9169	3.5814	0	0	5.4381	0	4.9394	4.3396	2.9968	5.6068	3.2369	3.329	4.413	4.2437	5.0286	0	3.9291	4.3978	0	3.9644	4.2183	4.5457	6.0132	4.0152	4.3178	5.8651	4.6384	4.6721	5.1654	4.0125	4.3249	5.778	4.8718	4.3466	4.1505
hsa-miR-6826-5p		0	1.63443	2.44465	1.74002		0.00808445	0.0382146		0	0	0	0	0	0	0	0	0	0	0	2.4034	2.7074	0	0	2.915	0	3.8535	0	0	0	4.4145	2.9648	0	3.6234	0	4.0509	4.297	2.9448	0	4.1647	3.6384	4.409	0	0	3.3863	3.4561	0	0	4.025
hsa-miR-6830-3p		0.807582	3.85542	3.65689	4.2435		3.34163e-05	0.000460851		0	0	0	0	0	4.2388	0	0	0	4.6446	0	5.1038	4.4729	2.4493	4.3042	2.5931	3.914	0	3.3692	4.9771	4.9966	4.2701	4.1023	5.1833	4.24	0	0	5.1335	2.9448	4.1734	4.9017	4.4039	5.1227	3.718	4.4719	5.3559	6.2287	4.5374	3.9316	3.8135
hsa-miR-6831-5p		0.392973	1.0891	1.57467	3.29089		0.000242107	0.0023106		0	0	0	0	0	0	0	0	0	4.3227	0	0	0	2.2083	0	2.0525	0	3.065	0	0	0	0	4.0352	0	3.8864	0	0	4.5771	3.0823	2.5104	0	0	3.3502	0	0	3.8014	3.4561	4.1013	3.3466	4.2094
hsa-miR-6832-5p		0.371673	3.18528	3.15128	3.95617		2.77263e-06	5.88325e-05		0	0	0	0	0	0	0	4.0884	0	0	0	3.7253	3.4729	2.8364	3.3042	2.915	4.0946	4.1906	4.4281	4.1026	0	3.8295	3.8908	0	3.8039	0	4.3989	6.1901	3.8708	2.7328	0	4.4039	5.2888	4.0659	3.7129	0	4.3305	4.0138	4.2726	3.8135
hsa-miR-6833-3p		0.7669	3.18556	2.91545	3.27651		0.00196157	0.0130945		0	0	0	0	0	3.7913	0	0	0	4.6446	0	3.6664	3.909	2.5562	3.9823	2.5931	4.0946	3.6931	4.2437	4.588	0	3.9291	4.1665	0	3.1759	0	3.679	3.9491	0	3.6259	4.1647	3.9014	4.3502	3.8435	0	4.5562	4.119	0	4.1946	3.3729
hsa-miR-6833-5p		1.5209	3.66369	4.22916	3.49923		0.000202723	0.00202723		0	3.896	0	0	4.5158	0	0	0	3.4105	4.9076	0	4.0814	3.5554	3.0708	4.1522	3.6374	3.914	3.7755	3.9542	3.588	4.4491	4.6071	4.0352	0	4.4714	3.8964	4.0509	5.297	4.3233	3.0129	4.6672	4.1238	4.6721	4.346	3.4719	4.6593	4.515	4.7687	0	4.3729
hsa-miR-6837-3p		0.430218	0.64475	0.288773	2.44844		0.00161944	0.0115261		0	0	0	0	0	0	0	0	4.7324	0	0	0	0	0	0	2.6805	0	0	3.2437	0	0	0	3.1023	0	0	0	3.1765	0	0	0	0	0	0	0	0	0	3.5715	3.8212	0	0
hsa-miR-6838-3p		0	2.55513	2.87468	0.259167		2.57229e-06	5.51833e-05		0	0	0	0	0	0	0	0	0	0	0	3.4737	4.2923	2.2083	0	1.915	4.3994	3.6056	4.1062	3.6551	0	3.8295	4.2867	0	0	3.6333	3.8394	4.1901	3.9448	3.1734	0	0	4.2888	3.8435	0	4.7082	0	0	0	0
hsa-miR-6843-3p		1.10087	3.24749	4.2708	2.18365		0.00014569	0.0015495		0	0	4.6395	0	0	0	0	0	3.4105	4.0596	0	4.2107	4.1928	3.4493	3.2047	3.178	3.914	3.6931	4.0322	4.0537	0	4.2701	3.5498	0	3.7165	5.2183	4.3464	4.9491	4.0152	2.8323	4.4866	4.1238	4.1575	4.1654	4.7129	3.9713	3.5715	0	0	3.7355
hsa-miR-6846-5p		1.00447	2.14129	3.80253	3.02347		0.00275752	0.0170477		0	0	0	0	0	3.7913	0	3.7099	3.548	0	0	3.0814	0	2.5562	0	0	3.4665	3.6056	3.1062	3.1957	0	3.6071	3.6429	0	3.7165	3.6333	4.1151	5.1901	4.2668	3.0129	4.7497	0	4.0871	4.2585	3.7129	4.8014	3.5715	0	4.3466	6.2521
hsa-miR-6847-5p		0.717727	2.6828	2.96811	1.94692		0.00769169	0.0367736		0	0	0	0	0	0	0	0	3.789	0	4.106	3.2513	2.7074	2.9188	3.0978	3.7223	4.0071	3.5125	3.8717	0	0	3.4816	3.8128	0	3.1759	0	3.9134	3.8116	3.9448	2.5104	4.2802	0	4.0131	3.718	3.3344	3.1233	0	3.7142	3.3466	0
hsa-miR-6852-3p		5.68311	4.12399	5.25048	5.18969		0.00690764	0.0339299		6.5066	5.6065	5.2244	5.9841	6.0633	5.2388	6.1421	4.8474	6.1109	5.0596	5.7305	5.3668	4.2923	4.6315	4.2553	4.8025	4.651	3.6056	4.7384	5.1026	0	5.3797	5.5498	0	5.3603	4.3114	5.1151	4.0746	5.5771	5.2108	6.1033	4.9014	5.4931	5.718	5.4048	5.8457	6.515	5.6285	5.5166	4.3729
hsa-miR-6853-5p		0.699264	1.73341	0.959073	3.61213		0.000306995	0.00285392		0	0	0	0	0	0	3.7189	3.973	0	0	0	0	2.8449	0	3.0978	2.4004	0	0	0	3.588	4.6555	0	0	4.5053	3.1759	0	3.7614	0	3.2079	0	0	0	0	3.5805	0	0	4.2634	3.7142	3.9316	4.5198
hsa-miR-6854-3p		5.18318	1.62528	2.40915	3.57253		7.17509e-05	0.000866726		6.298	4.3434	6.2244	5.7617	5.7696	4.8555	4.7189	4.9116	3.6735	5.13	5.3284	3.9883	2.7074	0	4.2047	0	0	0	3.5916	0	4.4491	0	3.8128	0	0	0	3.1765	5.6596	4.2668	2.3849	4.0392	0	0	0	3.7129	3.2608	4.9155	5.4061	3.8321	3.266
hsa-miR-6855-3p		3.98335	2.76977	3.7744	1.45044		0.00348235	0.0200016		4.5066	4.4366	5.3765	4.4987	4.1373	4.0323	3.5814	0	4.4809	4.4381	4.3284	3.3293	2.7074	2.5562	2.8567	3.1166	3.5921	0	3.5916	0	4.4491	4.7226	3.8908	0	3.9644	4.2183	4.2919	5.0746	3.3233	3.0129	4.5797	0	3.5725	4.346	4.5974	4.5018	3.8711	0	0	6.61
hsa-miR-6857-3p		6.33689	5.88871	6.24929	6.4698		0.00689261	0.0339225		6.5875	6.4138	6.8874	6.4987	6.5158	6.0868	5.7831	6.4324	6.133	6.2613	6.106	5.8888	5.3855	5.4904	5.7372	5.4004	6.5463	5.7141	6.4425	4.9506	6.2405	6.4651	6.3294	6.0902	5.7609	5.835	6.2354	7.1043	6.5771	5.4646	6.5105	5.6019	6.8205	6.3029	6.2219	6.0681	6.7537	6.4232	6.6097	6.5081
hsa-miR-6859-5p		7.91885	6.24514	6.70918	6.60463		1.29739e-10	9.08311e-09		8.146	7.9042	8.3213	8.4435	8.1008	7.5217	7.4979	7.7543	7.4895	8.3302	7.5979	6.6437	5.8117	5.4904	6.3281	5.451	6.4665	6.6609	6.3541	5.4436	6.6313	6.4651	6.709	6.6752	6.3014	7.1188	6.7104	7.5664	7.1775	5.7834	6.9721	6.0169	7.069	6.6508	6.3344	6.4013	7.2805	7.1327	6.8827	6.4725
hsa-miR-6861-3p		5.91592	4.54622	5.53058	5.10562		0.00170739	0.012072		5.8505	6.3434	6.0989	6.5343	6.2077	5.4194	5.2137	6.0319	5.298	6.13	5.9473	5.1689	5.3627	4.1752	4.4417	4.1166	5.4334	5.7141	5.399	4.4811	4.2081	4.8801	4.9648	0	5.3014	5.3114	5.6576	6.2175	6.1621	4.3178	5.709	5.5259	6.0871	5.346	5.0568	5.4452	5.363	5.1431	5.4842	5.025
hsa-miR-6861-5p		0	3.29822	3.72305	1.10708		2.13611e-08	8.78956e-07		0	0	0	0	0	0	0	0	0	0	0	3.9394	3.8449	2.9188	4.2047	3.3479	4.914	3.065	4.5391	3.1957	0	3.8295	4.8523	0	3.5238	3.8964	4.4495	4.6596	4.2079	2.5104	4.7497	4.0169	4.6721	0	3.8198	3.9713	0	0	3.6097	2.8875
hsa-miR-6862-3p		1.1232	2.45405	3.18599	3.80644		0.00253448	0.0161052		4.5066	0	0	0	0	0	0	0	3.4105	4.4381	0	3.4034	3.3855	2.5562	0	3.2369	0	3.8535	3.1062	3.1026	0	4.5457	3.6429	0	3.5238	4.3114	3.2919	5.297	3.3233	3.3178	0	3.6384	4.1575	0	3.8198	3.8888	4.193	3.7142	4.1122	3.653
hsa-miR-6867-3p		0	1.57823	2.51985	2.25049		0.00108714	0.00827071		0	0	0	0	0	0	0	0	0	0	0	2.9883	2.7074	0	3.5672	2.2935	0	0	0	3.9506	0	0	3.5498	0	3.0384	0	3.0509	4.297	3.3233	2.2474	0	0	4.0131	3.5805	3.8198	3.3863	3.4561	3.8212	0	3.025
hsa-miR-6868-5p		0	1.64878	0	0.7469		0.00968608	0.0438846		0	0	0	0	0	0	0	0	0	0	0	2.4034	0	0	0	0	0	0	0	2.6551	4.9186	4.1096	3.2279	5.7683	0	0	0	0	0	0	0	0	0	0	0	0	0	0	0	3.3729
hsa-miR-6869-3p		0	1.48249	0.277355	1.90322		0.00414715	0.0228275		0	0	0	0	0	0	0	0	0	0	0	2.4034	0	0	0	1.915	3.8145	2.9275	3.1062	0	0	0	2.9648	0	3.6234	0	3.0509	0	0	0	0	0	0	0	0	0	4.193	3.9207	3.6097	0
hsa-miR-6871-3p		4.87328	2.55595	4.36542	4.99393		3.13038e-07	9.69673e-06		4.3911	4.7585	5.3025	4.6362	4.6228	4.5798	4.7831	4.973	5.133	5.3815	5.0446	3.5409	3.7074	2.6558	0	2.6805	3.329	3.9979	0	3.3656	0	4.8801	3.4502	0	4.1759	4.3114	4.5915	5.0132	4.4303	3.3178	4.7497	3.9014	4.0871	4.5065	4.0999	5.0108	5.0004	4.7142	4.6097	5.4725
hsa-miR-6873-3p		1.24628	3.7568	4.4123	4.32867		5.81415e-05	0.000724762		4.5066	0	0	0	0	0	0	4.2949	0	4.9076	0	5.4908	4.2923	3.5038	4.0412	3.9854	4.5307	3.306	4.2437	5.2181	0	4.6071	4.8523	0	4.5238	3.8964	5.0178	5.4896	4.4303	4.0129	4.1647	3.9014	4.5725	4.4285	4.0125	4.6087	6.0999	4.8718	4.1122	4.3729
hsa-miR-6882-3p		5.96057	3.66042	4.57865	4.74373		3.33945e-05	0.000460851		5.9761	5.481	6.3765	6.7313	6.6483	5.9466	5.617	5.8799	5.4809	5.9076	5.5211	4.8093	5.0293	2.9188	4.2047	3.2935	4.762	4.891	4.7842	4.1499	0	4.1921	4.6873	0	3.5238	3.7708	4.2354	6.2175	4.8708	3.5693	4.8277	4.0169	4.7652	4.1654	4.7673	5.1589	5.2634	5.1013	4.1946	5.1202
hsa-miR-6883-5p		0	0.641957	1.23548	2.24213		0.00503573	0.0267224		0	0	0	0	0	0	0	0	0	0	0	0	0	0	2.8567	2.6805	0	0	0	0	0	0	3.4502	0	0	0	3.3989	0	0	0	0	0	3.2246	3.8435	0	3.1233	4.193	0	0	3.8875
hsa-miR-6892-3p		0.413455	3.10416	1.63825	3.09237		0.000262389	0.00247133		0	0	0	0	0	0	0	0	4.548	0	0	4.5733	2.9704	2.6558	3.5672	2.0525	4.255	0	3.7842	3.588	4.4491	3.3441	3.2279	4.9907	0	0	0	4.0746	3.3233	3.0129	3.9017	0	0	0	0	3.7082	3.9586	4.4732	3.6097	4.1505
hsa-miR-6893-5p		4.25805	1.75737	1.4141	2.22753		0.00236062	0.015271		4.5066	4.2439	4.8619	5.1768	5.2077	0	3.9599	4.7099	3.789	5.6919	4.691	3.2513	2.9704	2.0708	0	2.2935	3.5921	3.413	3.3692	0	0	0	3.6429	0	0	0	3.7614	5.0132	3.4303	0	0	0	3.3502	0	0	0	0	4.0138	0	3.5656
hsa-miR-708-5p		2.67613	5.39924	4.56467	3.17317		0.000534201	0.00457626		4.6135	3.896	4.6395	4.4987	0	3.6538	3.9599	0	4.176	0	0	5.4213	5.4729	4.6796	5.9823	5.1008	5.7076	5.1602	5.8066	4.4436	5.0706	5.9994	5.8717	5.0902	5.7826	0	5.3464	5.3965	5.5055	4.7068	4.4866	3.7759	6.5596	5.3029	4.8704	4.2608	4.626	4.0138	0	4.025
hsa-miR-7107-5p		6.01275	5.46223	5.78365	5.11498		0.00267141	0.0166383		6.2324	6.3673	6.264	6.5691	6.0249	5.4612	4.9599	5.5579	6.2179	6.4101	6.0756	5.1899	5.1928	4.6558	5.2302	4.5472	5.5307	5.7553	5.6911	4.7503	6.1062	6.251	5.9827	6.0902	5.4978	5.7377	5.7813	6.8472	5.9804	4.5693	6.2236	4.7088	6.069	6.1654	5.2604	6.2771	6.0609	6.0362	5.1122	5.2094
hsa-miR-7108-3p		6.03169	4.75174	5.26767	4.99912		2.98254e-06	6.13621e-05		6.2656	5.8289	6.142	6.3467	6.2417	5.7582	5.8445	5.2949	5.9712	6.5191	6.1358	4.636	4.6334	4.2407	5.6641	3.7223	4.762	4.65	4.8286	4.7807	4.0706	5.2701	5.2576	4.7683	5.24	4.5593	5.4244	6.534	5.1775	4.48	5.7497	4.5644	5.9351	5.5065	4.5974	5.4161	5.3305	5.5988	5.3466	5.6317
hsa-miR-7109-3p		0.381555	0.972643	0	2.12786		0.00282934	0.0173634		0	0	0	0	0	0	0	0	0	4.1971	0	2.5409	0	0	2.7192	2.0525	0	0	0	3.003	0	0	0	0	3.3014	0	0	0	0	0	0	0	0	0	0	0	3.4561	3.7142	4.4842	0
hsa-miR-7112-3p		0	1.68116	1.61887	0		0.000550914	0.00468412		0	0	0	0	0	0	0	0	0	0	0	0	2.7074	2.6558	2.7192	2.2935	0	3.1906	0	3.003	0	0	3.3433	0	3.6234	0	3.5915	4.6596	0	2.5104	0	0	3.4656	3.5805	0	0	0	0	0	0
hsa-miR-7114-5p		0.706318	0.392936	0.380918	2.44062		0.00220962	0.0144808		0	0	0	0	0	0	0	0	3.789	0	3.9805	2.7819	0	0	2.7192	0	0	0	0	0	0	0	0	0	0	0	0	4.1901	0	0	0	0	0	0	0	0	3.778	0	4.1122	3.4725
hsa-miR-7-1-3p		1.46118	3.8758	2.90144	3.6891		0.00658986	0.0327507		0	4.0215	0	0	0	0	3.5814	0	4.4105	4.0596	0	4.7819	4.5147	4.0343	4.0412	5.4879	4.5307	4.2495	4.3078	3.3656	4.9186	0	0	5.1833	4.8457	0	3.1765	0	3.7104	3.7328	4.3871	4.4864	4.8945	0	4.4048	3.1233	3.5715	0	3.7252	4.1505
hsa-miR-7150		2.90806	1.05564	1.28802	4.33027		2.41045e-05	0.000360133		0	0	0	4.9841	4.7223	4.7242	0	3.973	4.6121	4.545	4.428	3.1689	2.8449	2.0708	0	0	3.4665	0	0	0	0	0	3.2279	0	0	3.6333	0	4.5771	3.7104	2.2474	0	0	0	0	0	0	4.9586	4.7687	4.417	4.3729
hsa-miR-7160-5p		1.23809	3.13576	3.80469	3.68872		0.00914752	0.0420518		4.6135	0	0	0	0	4.9169	0	0	4.0886	0	0	0	2.9704	0	0	2.0525	4.5307	4.3605	4.4847	3.4436	4.9966	4.1096	3.9648	5.1833	3.8039	5.1694	2.9134	4.9491	4.2079	2.7328	4.9017	0	4.0871	5.5065	4.2604	3.1233	0	4.3357	6.2145	3.1505
hsa-miR-744-5p		9.82062	9.10649	9.36958	9.36672		0.00191646	0.0129309		9.704	9.7196	9.734	9.4435	9.7461	9.8417	10.278	9.5479	10.016	9.732	10.264	9.0298	9.1864	9.5699	9.1184	10.153	9.0759	7.9893	8.9741	9.125	8.5102	9.2772	9.3451	8.699	9.4376	8.5257	9.003	8.5557	10.173	9.644	9.2836	9.0945	9.6028	9.3723	9.9193	9.8915	9.6977	9.8066	8.7763	9.5414
hsa-miR-758-3p		0	0.892143	1.69294	0		0.005747	0.0295526		0	0	0	0	0	0	0	0	0	0	0	2.6664	0	0	0	2.5931	0	0	0	0	0	3.6071	0	0	3.6234	0	3.3989	4.8819	0	2.7328	0	0	3.7652	3.8435	0	0	0	0	0	0
hsa-miR-7-5p		9.20813	9.92484	9.65669	10.1426		0.00598982	0.0304807		9.0776	9.2976	9.0145	9.0409	8.8707	9.0427	9.9087	9.8474	9.6866	8.345	9.1577	10.076	9.8813	10.563	10.473	10.577	9.7653	9.838	9.7544	9.5277	10.128	8.947	9.4357	10.279	9.7023	11.165	10.404	9.7184	8.5566	9.5979	9.5105	9.7738	8.9892	9.6095	9.6216	9.2771	9.921	9.4609	10.703	10.51
hsa-miR-761		0	2.44925	2.07804	0.264042		0.000773475	0.00622251		0	0	0	0	0	0	0	0	0	0	0	0	0	0	0	2.178	3.4665	0	3.1062	4.4051	4.556	4.2701	3.2279	4.5053	4.5744	0	4.3989	5.775	2.9448	0	0	0	4.6232	5.1165	0	0	0	0	0	0
hsa-miR-7641		3.21413	4.74419	4.8862	3.90894		0.009141	0.0420518		4.6135	3.896	0	4.9841	0	0	3.5814	3.8474	4.6121	4.545	5.2759	4.0356	4.5147	4.5038	4.1522	5.6699	5.3647	3.9275	5.5656	4.003	5.5035	3.6071	5.2576	5.6428	4.6707	4.8964	5.0834	5.3476	4.9083	4.9698	4.4866	4.4864	5.1575	5.0134	4.5974	4.8014	4.2634	4.0138	4.3466	4.2094
hsa-miR-769-5p		5.30663	6.08769	5.89052	5.26088		0.000227486	0.00221157		5.5066	5.137	4.9614	5.8772	5.4593	5.4612	5.9319	4.8474	5.2179	5.0596	4.9134	5.9269	6.1134	6.3263	5.9823	8.3295	6.2359	5.6931	6.3541	5.003	6.2081	5.6946	6.1821	5.7069	5.4714	5.5968	5.7813	5.8819	5.8324	5.8562	5.9721	5.8083	6.2081	5.4285	6.5202	5.9099	5.1565	4.3357	5.154	5.6949
hsa-miR-770-5p		0	1.57001	1.57086	0.278475		0.00810458	0.0382378		0	0	0	0	0	0	0	0	0	0	0	2.9883	0	0	0	1.915	3.329	3.306	3.2437	0	0	3.4816	0	0	3.7165	0	3.0509	4.1901	4.0152	2.3849	0	3.6384	0	0	0	0	0	0	0	0
hsa-miR-7847-3p		5.05673	4.68599	5.05898	5.87582		0.00022121	0.00216159		5.561	5.2945	4.755	5.1768	4.6228	4.9758	4.8445	5.4755	5.2585	5.4381	4.2215	4.0356	3.909	3.7933	4.5266	4.451	4.7076	4.5125	5.5391	4.6875	4.9186	5.4484	5.1975	4.9907	4.8864	4.7708	5.1151	6.8116	4.3778	3.7328	4.6672	4.0169	5.3799	5.8131	5.0125	5.9511	6.119	5.1013	6.7526	5.8875
hsa-miR-7848-3p		0.356082	1.10021	1.32963	2.86773		0.00515284	0.0272287		0	0	0	0	0	3.9169	0	0	0	0	0	3.0814	2.7074	0	0	2.178	0	0	0	0	0	0	3.8128	0	3.6234	0	0	4.297	0	2.6259	4.5797	0	0	0	0	3.1233	3.4561	4.6577	0	3.7355
hsa-miR-7977		5.63709	6.19476	6.84156	5.80508		0.000994903	0.00763672		5.1984	5.4366	5.3025	5.1768	5.7696	5.7242	6.347	5.5579	5.7324	5.7821	5.9805	7.3435	6.3162	7.3562	5.9365	6.8645	5.499	5.0319	5.4567	5.4625	5.141	6.7226	7.5377	5.3533	6.7051	5.2656	6.8489	6.9974	7.6285	6.449	6.5105	5.9603	7.3426	6.8131	7.839	7.6023	6.6393	5.8718	5.4842	4.851
hsa-miR-802		0	3.70464	1.81711	2.71036		4.56482e-05	0.000590603		0	0	0	0	0	0	0	0	0	0	0	4.1689	3.2923	4.5818	6.4634	5.2935	4.0946	4.9979	3.5916	3.8961	0	4.3441	4.1023	0	3.0384	4.2183	0	0	0	2.7328	0	5.3164	0	0	3.9193	3.8014	0	4.1013	0	4.025
hsa-miR-8056		0	0.637707	1.88267	0.25575		0.00355842	0.0203176		0	0	0	0	0	0	0	0	0	0	0	2.4034	0	2.3339	0	0	0	4.1906	0	0	0	0	0	0	0	0	3.2919	3.8116	3.0823	0	0	0	0	4.0659	3.3344	3.1233	0	0	0	0
hsa-miR-8058		7.37311	5.47933	5.91382	5.73822		2.45428e-12	2.56677e-10		7.376	7.1508	7.9249	7.7003	7.2911	7.2977	6.8445	7.2949	7.374	7.4101	7.4399	5.3482	5.3627	4.7262	5.7724	4.915	5.762	5.7755	5.6911	5.1499	4.8361	5.9764	6.5854	4.8838	5.9259	5.8033	5.5688	6.899	5.9083	5.1734	6.7892	5.3164	6.2246	5.9024	5.536	5.9306	5.9155	6.3714	6.154	5.4482
hsa-miR-8073		0	0	0.346509	1.53334		0.0039125	0.0220188		0	0	0	0	0	0	0	0	0	0	0	0	0	0	0	0	0	0	0	0	0	0	0	0	0	0	0	3.8116	0	0	0	0	0	0	0	0	4.119	3.5988	0	0
hsa-miR-8075		0.397864	0.445257	2.40268	0.559058		0.00380505	0.0215105		0	0	4.3765	0	0	0	0	0	0	0	0	3.2513	0	0	2.9823	0	0	0	0	0	0	0	0	0	0	0	0	4.297	4.0152	0	0	3.9014	3.2246	3.718	4.0125	3.2608	0	3.8212	0	2.8875
hsa-miR-8078		4.8459	3.44996	4.31586	4.90296		0.000694178	0.00569408		5.0541	5.4366	4.9614	5.1768	4.9853	4.3319	4.0668	4.2949	4.4809	4.8252	5.691	3.8888	3.7074	0	3.3042	3.178	4.914	4.1292	4.9937	3.5176	4.3336	3.9291	4.2279	0	4.1759	3.8964	4.1765	5.0132	4.0823	3.3178	4.4866	4.9603	3.8527	4.959	4.4048	4.3249	5.0806	5.0582	4.417	4.653
hsa-miR-8085		0	0.427143	1.08601	2.04857		0.00586554	0.0299847		0	0	0	0	0	0	0	0	0	0	0	0	0	0	0	3.0525	0	2.9275	0	0	0	0	0	0	0	0	0	3.9491	0	0	0	0	4.2888	0	0	3.7082	3.193	3.3357	0	3.5656
hsa-miR-888-5p		4.7353	4.23599	4.21849	5.24198		9.78638e-05	0.00112164		5.0541	4.9601	5.142	5.1768	4.2748	3.9169	4.0668	5.1954	4.6121	5.2613	4.428	4.7538	3.7778	3.7489	3.5672	4.3744	5.0071	4.1906	4.9937	3.003	4.9186	4.9291	3.7304	4.5053	3.8039	4.3989	3.8394	4.6596	4.0823	3.3178	4.2802	4.2233	5.2246	3.5805	4.4719	4.3249	5.515	4.5988	5.1122	5.6317
hsa-miR-92a-1-5p		6.02742	4.76824	5.05094	4.92078		9.10197e-06	0.000156479		6.5066	6.2179	6.6091	6.3467	6.2748	4.6538	5.4294	5.7803	5.7324	6.6446	6.106	5.2107	4.4729	3.9968	5.1252	3.841	4.914	5.1292	5.1062	3.588	5.2081	5.514	5.0352	4.5053	5.1088	4.7037	5.1765	5.8819	5.1148	4.4173	5.9721	4.0169	5.5981	5.4285	4.4048	4.8457	5.1565	5.5684	4.9316	5.2094
hsa-miR-92a-3p		13.8065	14.1801	14.3924	14.4121		0.00537344	0.027982		13.521	13.7	13.697	13.842	13.471	14.386	13.756	14.028	14.077	13.549	13.844	14.042	14.077	15.095	13.785	14.246	13.933	14.659	13.957	14.377	14.297	13.881	13.937	14.268	13.968	15.571	14.697	14.421	14.025	14.666	14.353	14.374	14.272	14.221	13.877	13.839	14.206	13.965	15.278	14.128
hsa-miR-92b-3p		9.04726	8.75554	8.98749	9.70348		3.51096e-07	1.03865e-05		8.8061	9.0439	9.1941	8.9383	9.02	9.4247	8.9248	9.1396	9.1247	8.8357	9.068	8.7819	8.7231	9.1762	8.4252	8.1166	8.5996	9.2203	8.6012	8.9185	8.8308	8.8231	8.845	8.699	8.8171	10.144	9.1595	9.1831	8.3576	8.978	7.9976	9.4611	8.955	9.1981	8.8069	8.6215	9.4083	9.3447	10.172	9.6263
hsa-miR-92b-5p		5.30841	4.69166	4.73378	5.98937		1.60063e-05	0.00025832		5.561	4.4366	5.755	4.9841	5.339	5.2861	5.3888	5.1954	5.8435	5.3815	5.2215	3.5409	4.5554	4.2083	3.8567	3.915	5.3647	5.278	5.1766	4.588	5.6555	4.1921	4.5009	6.0902	4.7609	5.866	5.3729	5.1901	4.5298	4.449	4.4866	6.0713	4.4656	3.718	3.5974	4.3249	5.3305	5.8212	6.3998	5.975
hsa-miR-93-3p		4.64998	6.40564	6.10016	4.94394		2.59083e-05	0.000382528		4.1281	3.896	5.142	4.8772	4.1373	5.4194	4.5074	4.5579	5.133	4.4381	4.9134	6.4302	6.3043	7.1667	5.5471	7.2151	6.7486	6.5829	6.7615	5.8961	6.5815	5.9291	6.4758	6.3928	5.6472	6.669	6.0993	5.0746	6.1621	6.4332	5.3346	6.1744	6.105	6.2585	6.5974	6.1937	5.515	4.2617	4.8321	5.3205
hsa-miR-935		4.77489	4.91786	5.51995	4.49407		0.000511747	0.00441653		5.0541	4.6845	5.2244	4.4987	4.6228	4.2388	4.0668	4.1954	5.298	5.5957	5.0446	4.5733	4.7074	4.3927	5.0412	4.4004	5.2925	5.2203	5.4567	4.325	5.3336	4.9764	5.3978	4.7683	4.9644	4.8964	6.0344	6.3723	5.7928	4.1734	5.709	5.4039	6.1915	5.959	5.0999	5.0868	4.9155	4.4061	3.7252	4.653
hsa-miR-93-5p		13.3589	14.1816	13.7172	13.9766		0.000254951	0.00241482		13.386	13.349	13.226	13.085	13.08	13.448	13.73	13.591	13.719	12.963	13.371	14.015	14.432	14.964	13.895	14.516	14.048	14.607	14.066	13.862	14.568	13.359	13.94	14.527	13.743	14.943	13.52	13.072	13.373	14.072	13.336	13.725	13.369	13.719	14.033	13.727	13.457	13.295	14.079	14.209
hsa-miR-941		7.00622	7.87507	7.38396	8.48038		4.07695e-05	0.000541436		7.0729	6.6654	6.2244	8.131	6.0633	8.1457	7.2253	6.4324	7.3554	6.545	7.2076	8.5367	7.743	8.6407	7.3746	10.011	7.7687	6.628	7.7899	7.251	7.4351	7.8739	7.6144	7.4122	8.1718	7.5782	7.4495	7.4896	6.6563	7.3221	6.5105	7.5161	8.0367	6.959	8.5823	7.1233	9.0335	8.1787	7.6468	8.2166
hsa-miR-942-3p		6.40771	6.0907	5.79702	6.51335		2.10504e-07	6.86188e-06		6.534	6.5026	6.6091	6.3467	6.173	6.2388	6.3256	6.4104	6.176	6.4381	6.7305	6.3482	5.7605	6.4836	5.7549	5.6591	6.0515	5.9979	5.9542	5.7956	6.6066	6.0666	5.7926	6.6096	6.3889	6.2421	6.3989	5.8472	5.4303	5.6534	5.8277	5.3164	5.8096	5.8131	5.8198	5.6087	6.7291	6.5684	6.5793	6.3338
hsa-miR-942-5p		7.00265	7.41929	6.98843	7.47845		0.00748127	0.0359732		6.9559	6.8459	6.8874	6.9841	6.7461	7.2861	7.1902	7.5378	7.0428	6.4926	7.0602	7.6551	6.8693	8.47	7.0978	7.8761	7.2832	7.3538	7.1936	7.2455	7.8147	6.917	6.6873	7.7832	7.6234	8.0393	7.437	6.3476	6.6673	7.4213	6.7497	6.871	7.0226	6.4484	6.9073	6.9612	7.599	7.2233	7.9376	7.3271
hsa-miR-95-5p		1.9653	3.09409	2.26539	4.36392		0.00670047	0.0331719		4.8061	0	4.6395	0	0	0	4.4294	3.8474	3.8959	0	0	4.3668	3.1928	3.5562	4.0412	4.3479	3.914	3.9979	3.3692	3.7807	4.3336	0	0	0	4.4169	4.0118	0	0	3.0823	3.449	0	0	3.5725	4.346	3.3344	3.1233	3.9586	4.3357	4.417	4.266
hsa-miR-96-5p		5.17912	8.27474	8.23146	5.84036		3.50777e-13	4.23081e-11		4.713	4.3434	5.755	5.0837	5.0633	5.0868	5.1175	5.8474	5.2585	5.3227	5.379	6.8562	8.0789	9.7671	8.0083	8.8645	8.7179	9.382	8.7001	8.4834	8.5431	7.4484	7.3776	8.6263	6.9926	9.8192	7.3464	9.0557	7.2154	8.6102	7.3346	8.5596	8.3044	8.3671	8.2556	7.6779	5.6525	4.4732	6.154	4.3729
hsa-miR-98-3p		7.016	6.1002	6.01147	6.20404		2.94703e-09	1.5096e-07		7.0156	7.0365	7.4468	6.7915	7.1553	7.0043	7.4294	7.0174	6.4284	6.715	7.1358	5.9016	6.3967	6.1239	5.9209	5.5931	6.0295	6.4258	5.934	6.4436	6.2081	6.2701	6.0858	5.7683	6.3014	5.8033	5.8953	6.6596	6.0823	5.9141	5.7892	6.2233	5.9351	6.1893	5.7673	5.8674	5.599	6.2036	5.6394	7.1278
hsa-miR-98-5p		11.2293	10.4565	10.5564	10.3003		4.29452e-08	1.58518e-06		11.312	11.291	11.412	10.714	11.304	11.154	11.841	11.145	10.997	10.866	11.486	10.325	10.55	10.89	10.609	10.634	10.505	10.491	10.371	10.943	10.062	10.214	9.9659	10.22	10.611	10.969	10.484	10.375	10.815	10.601	10.101	10.539	10.438	10.372	10.667	10.759	9.631	10.496	10.151	10.551
hsa-miR-99a-5p		5.86275	7.23384	7.50615	6.10993		3.51734e-07	1.03865e-05		5.8505	5.8289	5.4468	6.0837	5.2077	6.5414	4.9033	6.0027	6.3365	6.4101	5.8786	6.2712	7.4298	6.3111	7.65	6.5059	7.9613	7.4065	8.0274	6.7579	6.9775	7.6295	7.5438	7.1606	7.6413	7.1058	8.1072	7.1335	7.9312	7.5291	8.3413	8.3554	6.994	7.3775	6.8579	6.8348	5.4561	6.3714	4.1122	5.5198
hsa-miR-99b-3p		0.906336	3.44934	2.8177	3.56524		0.00494926	0.0263888		0	0	0	0	4.9029	0	5.0668	0	0	0	0	3.9883	4.0293	4.2083	4.2553	4.0849	3.914	3.6056	3.5916	4.5176	0	4.8295	3.6429	0	3.6234	0	3.3989	4.0746	4.1465	4.7834	4.5797	0	4.8527	0	0	5.1589	4.3305	5.0138	3.3466	4.1505
hsa-miR-99b-5p		8.9931	7.91562	7.96729	8.42499		0.000250026	0.00237714		8.9811	8.9001	8.6168	8.5862	9.3966	9.0868	9.4092	8.3538	9.3855	9.0686	9.1394	8.4079	8.2711	8.4649	8.971	8.2584	7.7885	7.413	7.6851	7.7271	6.4211	8.92	7.8228	6.6752	7.9926	6.9408	7.4984	7.6086	8.361	9.0405	7.6021	7.7343	8.257	8.2301	7.3253	9.0421	8.1703	9.0853	8.6901	8.6767
[variables end]
[truncated: 8 more columns]

## Sheet: Suppl Tab 2
Supplementary Table 2. Two group comparison: differential serum miRNAs between patients with advanced HCC vs. cirrhosis (FC>1.34 UP or DOWN, p-value<0.01)
							SampleType	CE	CE	CE	CE	CE	CE	CE	CE	CE	CE	CE	CE	CE	CE	HCC	HCC	HCC	HCC	HCC	HCC	HCC	HCC	HCC	HCC	HCC	HCC
							SampleName	Gra_S53	Gra_S55	Gra_S61	Gra_S56	Gra_S60	Gra_S48	Gra_S57	Gra_S49	Gra_S52	Gra_S51	Gra_S59	Gra_S54	Gra_S50	Gra_S58	LG771	LG932	LG396	LG766	LG842	LG869	LG736	LG666	LG801	LG931	LG802	LG828
miRNA	Average log2 reads HCC Advanced	Average log2 reads Cirrhosis	p-value (t-test)	Difference	Fold change HCC_Advanced / Cirrhosis
hsa-let-7a-5p	16.5188	15.7999	0.00410632	0.718822	1.64584	UP		15.873	16.094	16.859	16.065	16.321	15.493	15.962	15.372	16.4	14.86	15.616	15.301	15.014	15.969	15.574	16.378	16.759	16.889	16.057	16.033	17.107	15.875	17.066	17.121	16.013	17.353
hsa-let-7b-3p	11.3405	10.6743	6.95399e-05	0.666214	1.5869	UP		10.771	10.901	10.943	10.949	10.142	10.604	10.79	10.498	10.964	10.369	10.928	10.339	10.361	10.881	10.432	11.32	11.257	11.887	11.021	11.124	11.486	11.496	11.543	11.677	10.941	11.902
hsa-let-7b-5p	16.7479	15.7085	0.000143845	1.03942	2.0554	UP		15.432	15.798	16.558	15.762	16.028	15.965	16.076	15.837	16.063	15.442	14.962	14.657	15.619	15.72	15.587	16.875	16.877	16.981	16.538	16.268	17.774	15.993	17.409	17.593	15.963	17.117
hsa-let-7c-5p	11.9229	11.1551	0.000615847	0.767774	1.70264	UP		10.799	11.238	11.319	11.725	10.434	11.267	11.8	11.293	11.503	11.036	11.075	10.399	10.963	11.321	10.529	12	11.764	12.239	12.216	11.658	12.422	11.834	12.461	12.432	11.224	12.296
hsa-let-7e-5p	10.8995	9.94356	7.90929e-05	0.955936	1.93984	UP		10.284	10.396	10.139	10.872	9.4362	10.01	9.4974	9.92	10.374	8.8984	10.549	9.6914	9.0035	10.139	10.151	11.779	11.36	11.143	11.01	11.171	10.782	10.532	10.741	10.665	10.716	10.744
hsa-let-7f-5p	15.9103	15.2112	0.00170726	0.699119	1.62351	UP		15.507	15.525	16.19	15.602	15.741	14.768	14.958	14.658	15.717	14.269	15.13	15.049	14.415	15.428	15.513	15.942	15.759	16.204	15.437	15.621	16.029	15.254	16.176	16.41	15.815	16.764
hsa-let-7g-3p	0.583692	2.75526	0.00260207	-2.17157	4.50514	DOWN		3.7819	3.8449	3.3927	3.0978	4.451	0	3.7755	0	4.1499	0	4.1096	3.7304	0	4.24	0	0	0	0	0	3.9267	3.0776	0	0	0	0	0
hsa-let-7i-5p	15.8663	15.0622	0.000443534	0.804036	1.74598	UP		14.856	15.119	15.883	15.275	15.461	15.072	15.385	14.962	15.485	14.6	14.635	14.415	14.726	14.997	15.19	15.564	16.615	16.067	15.311	15.334	16.725	15.201	16.297	16.469	15.346	16.276
hsa-miR-100-5p	5.50787	6.54289	0.00133109	-1.03502	2.04914	DOWN		5.9269	7.0789	5.3488	7.3631	5.4132	6.735	7.4385	6.5916	6.0783	6.9581	6.3972	6.3294	7.1375	6.8039	5.5715	6.2992	3.6097	5.266	5.852	6.4121	5.0411	5.7039	5.8794	5.7085	6.1318	4.6192
hsa-miR-101-5p	10.6725	9.76404	0.000910585	0.908423	1.87699	UP		9.1649	9.6203	9.9081	9.4967	9.2725	9.577	10.144	9.1017	9.9117	10.74	9.6714	9.4308	10.968	9.6894	10.126	9.7919	11.654	10.792	10.404	10.211	11.554	11.322	10.898	10.279	9.7206	11.317
hsa-miR-106b-3p	9.06823	9.99519	0.000290342	-0.926959	1.90126	DOWN		9.7007	9.8551	10.735	9.3588	10.167	10.366	10.504	10.332	9.9279	10.63	8.9994	9.4599	10.651	9.2459	8.4372	8.4976	9.4718	8.8533	9.0489	9.0449	9.8191	8.4694	9.3836	10.048	8.5885	9.1565
hsa-miR-1183	3.43843	1.66004	0.00734518	1.77838	3.43041	UP		3.605	0	2.4493	0	2.841	0	3.6931	3.1062	0	0	3.8295	0	0	3.7165	3.6785	4.1013	3.3466	4.1505	3.709	3.4792	4.0036	5.2564	3.2356	0	3.4538	2.8466
hsa-miR-1185-2-3p	0	3.54118	1.84445e-07	-3.54118	11.6413	DOWN		3.9883	3.5554	3.0708	4.1522	2.178	4.4665	4.5125	4.7384	0	4.9966	0	4.2867	5.2708	4.3603	0	0	0	0	0	0	0	0	0	0	0	0
hsa-miR-1229-5p	4.37457	3.29318	0.00654713	1.08139	2.11607	UP		3.1689	3.5554	2.6558	2.8567	3.0525	3.8145	3.9979	3.2437	3.3656	4.3336	4.2701	3.5498	0	4.24	4.9155	5.2992	4.5483	4.5656	3.5835	4.6636	4.4561	5.2564	3.6506	3.1036	4.5469	3.9055
hsa-miR-1236-5p	2.3052	0.629529	0.00974922	1.67567	3.19468	UP		0	0	2.3339	0	2.763	0	0	0	0	0	0	0	0	3.7165	4.041	3.7142	0	3.4725	0	4.3417	3.0776	0	0	2.8406	3.0063	3.1685
hsa-miR-1237-5p	6.27329	3.48514	1.13066e-05	2.78816	6.90746	UP		4.7253	3.4729	2.8364	3.3042	2.841	4.177	5.2495	4.4847	3.2832	0	4.8295	4.5498	0	5.0384	6.8598	6.2992	6.1332	6.2798	6.9443	6.8778	6.2948	6.6299	6.0936	5.9781	5.6966	5.1924
hsa-miR-1246	7.47693	6.1383	0.00560912	1.33863	2.5291	UP		6.7957	5.909	4.6558	8.1555	5.193	6.2359	6.863	6.4281	5.8104	5.9186	6.2316	5.8327	5.5757	6.3312	10.161	10.324	7.1946	7.2238	7.6787	6.6922	6.6745	6.3205	7.358	7.5739	6.0704	6.4515
hsa-miR-1255b-5p	6.80197	5.91259	0.00155594	0.889382	1.85238	UP		5.6513	5.494	6.2407	5.1522	5.178	5.762	6.3738	6.1418	5.8539	6.8361	5.7226	5.3153	7.0902	5.9644	6.193	6.4061	7.6321	7.0002	6.567	5.8011	7.8484	6.3819	7.673	7.4494	6.1907	6.4808
hsa-miR-1257	0.519617	2.29101	0.00878127	-1.7714	3.41385	DOWN		2.5409	0	0	0	3.178	3.914	3.1906	3.8717	3.1957	0	3.9291	3.7304	0	4.5238	0	0	0	0	0	0	0	0	0	3.1036	3.1318	0
hsa-miR-125b-1-3p	5.79988	5.07194	0.00098999	0.727948	1.65628	UP		5.4213	5.3162	4.4213	4.8236	4.6805	5.3647	4.9979	5.1418	4.2401	4.9966	5.6946	5.5009	4.9907	5.4169	6.119	5.9911	6.2535	5.9918	6.031	6.5589	5.0036	6.4694	4.936	5.7475	5.4538	5.043
hsa-miR-126-3p	16.4051	15.7651	0.000725789	0.640012	1.55834	UP		15.798	16.173	16.079	16.356	15.364	15.575	15.465	15.597	15.857	15.167	16.213	15.879	15.12	16.068	16.157	17.194	16.081	16.811	16.282	16.223	16.547	17.234	16.161	15.823	16.206	16.142
hsa-miR-126-5p	13.5594	12.8448	0.000970874	0.714631	1.64106	UP		13.133	13.317	13.007	13.396	12.51	12.535	12.647	12.603	13.14	11.979	13.414	13.138	11.834	13.174	13.534	14.153	13.294	13.85	13.556	13.308	13.693	14.556	13.268	12.839	13.306	13.356
hsa-miR-1269b	0.289933	2.08431	0.00791287	-1.79437	3.46865	DOWN		0	3.6334	0	0	2.4004	3.4665	3.6931	3.3692	3.8961	0	4.4816	0	0	4.24	0	0	0	0	0	3.4792	0	0	0	0	0	0
hsa-miR-1270	5.70678	4.72874	0.00103041	0.978039	1.96979	UP		4.7538	4.0859	4.6558	3.3973	3.6374	5.5307	6.015	5.2437	4.1499	5.4491	5.3076	4.8523	4.8838	4.24	6.2461	5.968	6.6394	5.1803	4.879	5.7747	5.885	5.797	5.5086	6.2869	5.2473	5.069
hsa-miR-1271-5p	0	1.65751	0.00351825	-1.65751	3.15471	DOWN		2.4034	0	0	2.7192	3.2369	3.7076	0	4.1062	0	0	0	3.2279	0	3.8039	0	0	0	0	0	0	0	0	0	0	0	0
hsa-miR-1273a	0	1.31794	0.00932929	-1.31794	2.4931	DOWN		2.5409	0	2.4493	0	2.9854	0	3.413	0	3.7193	0	0	3.3433	0	0	0	0	0	0	0	0	0	0	0	0	0	0
hsa-miR-127-5p	0.250525	1.95118	0.00790745	-1.70065	3.25048	DOWN		2.9883	0	2.0708	0	2.2935	4.0071	0	3.9542	0	0	3.6071	4.2867	0	4.1088	0	0	0	0	0	0	0	0	0	0	3.0063	0
hsa-miR-1281	4.56055	3.07516	0.00879691	1.48539	2.79992	UP		4.1689	4.0293	2.7489	3.7192	2.841	4.255	0	4.5916	3.9506	0	4.6071	3.9648	0	4.1759	5.4257	5.1837	4.2726	4.3729	4.294	5.0198	4.3406	4.7039	4.11	3.9781	4.6762	4.3491
hsa-miR-1292-3p	4.12365	2.89307	0.00766077	1.23058	2.34661	UP		2.9883	2.8449	2.0708	0	2.841	3.914	3.413	3.9542	3.1026	4.3336	4.4145	3.4502	0	3.1759	4.4561	4.1837	3.8321	3.1505	4.372	4.9267	4.0776	4.1189	3.9725	3.911	4.9731	3.5096
hsa-miR-1294	6.98554	5.88449	0.00170641	1.10106	2.14512	UP		5.3852	5.7778	6.3488	5.8236	5.9768	6.7885	6.235	6.6791	6.6303	4.9966	5.5457	5.3708	4.7683	6.0563	6.5853	6.1635	8.8159	6.7051	6.9944	6.0642	8.0503	7.1545	7.5695	7.3766	5.1907	7.1565
hsa-miR-1307-5p	5.26481	6.14327	0.000151718	-0.878463	1.83842	DOWN		6.3388	6.1536	5.9088	5.7896	7.6154	6.4165	6.306	6.4281	5.7193	5.3336	5.6071	6.5133	5.4313	6.4444	5.7291	5.0582	5.1946	5.5429	5.1241	5.1073	4.7099	5.9263	5.4055	4.6886	5.4295	5.2617
hsa-miR-130b-5p	3.6815	5.49971	0.000896055	-1.81821	3.52643	DOWN		5.2712	5.3627	5.3927	5.7896	5.451	5.499	4.6931	5.399	5.588	5.793	6.1719	5.3153	5.5757	5.6937	4.9586	4.3357	3.9316	4.3729	5.031	4.6636	4.0776	0	0	4.6061	4.5469	3.654
hsa-miR-141-5p	2.10404	5.92351	2.81236e-07	-3.81947	14.118	DOWN		5.8229	6.0579	4.7933	6.2428	3.9506	6.5921	5.7755	6.2272	5.6051	6.3032	6.8035	6.4758	6.3533	5.9259	3.6785	0	3.4842	0	3.446	0	0	4.1189	3.5575	0	3.4538	3.5096
hsa-miR-144-3p	12.1769	12.9716	0.00525168	-0.794726	1.73475	DOWN		13.264	12.897	14.394	12.568	12.52	12.318	13.49	12.319	13.121	13.729	12.415	12.058	13.683	12.827	11.342	11.198	12.575	12.039	12.021	11.624	12.947	12.642	12.855	12.917	11.499	12.464
hsa-miR-144-5p	9.68956	11.2317	8.39891e-06	-1.54213	2.91224	DOWN		11.66	11.233	12.915	11.275	11.355	9.9986	11.724	10.036	11.524	11.566	10.603	10.976	11.521	10.857	9.7885	8.7787	9.2195	9.5037	9.4392	9.1822	9.9941	9.9518	9.8143	10.517	9.0487	11.037
hsa-miR-145-3p	4.34999	5.56513	0.00983997	-1.21514	2.32163	DOWN		6.0356	5.3855	5.3187	5.5266	6.4196	6.1364	4.6056	6.3388	6.1499	5.5035	5.2701	4.5971	5.3533	5.2711	4.8711	4.6577	0	4.3729	5.1241	5.3773	4.4561	5.7512	4.458	4.5631	5.2193	3.3491
hsa-miR-145-5p	7.14627	8.92039	4.41651e-08	-1.77412	3.42029	DOWN		9.3505	8.4782	8.7118	8.9189	10.211	9.2645	8.2886	9.2721	9.2469	8.4629	9.3053	8.4111	8.2814	8.6822	7.471	6.7417	5.7252	7.025	7.9821	7.9971	7.3556	7.3048	6.7591	7.2191	7.2404	6.9341
hsa-miR-148a-3p	13.897	13.1552	5.50007e-07	0.741786	1.67224	UP		12.979	12.76	12.828	13.132	13.708	13.37	12.994	13.406	13.258	13.324	12.911	12.938	13.287	13.278	13.614	13.747	14.04	13.862	14.132	14.406	13.707	13.617	14.059	13.673	14.354	13.553
hsa-miR-151a-3p	12.2873	11.6994	0.000120169	0.587976	1.50314	UP		11.601	11.86	11.673	12.016	11.419	11.604	10.915	11.67	12.165	11.537	12.05	12.068	11.403	11.81	12.397	12.629	12.528	12.488	11.871	11.98	12.132	12.885	11.984	11.917	12.363	12.274
hsa-miR-152-3p	9.14763	8.59916	0.00151799	0.548476	1.46254	UP		8.4235	8.3939	8.2226	9.366	8.5502	8.8959	8.0568	8.8422	8.4412	8.2405	9.008	9.3276	8.172	8.4478	9.4729	9.4189	9.6321	8.9876	9.4118	9.0532	8.7863	9.4694	8.9793	8.5576	9.2917	8.7108
hsa-miR-152-5p	4.12917	5.31098	1.14597e-05	-1.1818	2.2686	DOWN		5.7538	5.1928	4.5818	5.6452	3.9506	5.5307	5.7553	5.3388	5.1264	5.9966	5.5768	5.1347	5.7683	5.0019	5.0806	4.7142	3.8321	3.9579	4.7679	3.6048	3.563	4.1189	4.11	3.2191	4.1907	4.3909
hsa-miR-1537-3p	0.8806	3.17356	0.00100203	-2.29296	4.9006	DOWN		3.6664	2.7074	3.0708	3.4848	4.6374	3.4665	2.9275	3.6911	3.8395	4.7486	3.3441	0	0	4.8457	3.193	0	0	0	0	4.4121	0	0	0	0	0	2.9621
hsa-miR-15a-5p	10.5565	11.7841	0.000155362	-1.22755	2.34168	DOWN		11.382	12.054	12.955	11.229	12.718	11.663	12.491	11.498	12.213	11.224	11.183	11.399	11.491	11.477	9.9466	9.4526	11.871	10.671	9.8723	9.8479	11.298	10.08	11.37	10.732	9.9919	11.545
hsa-miR-15b-3p	7.8461	8.80497	0.000351499	-0.958871	1.94379	DOWN		8.2362	8.6286	9.6752	7.8403	9.1733	8.911	9.1621	8.8476	8.4926	9.697	7.8739	8.4373	9.618	8.6765	6.99	7.2135	8.6021	7.7847	7.7894	7.3596	8.7472	7.7512	8.1059	8.2122	7.3671	8.2303
hsa-miR-15b-5p	11.1135	12.2535	0.000288483	-1.13995	2.20373	DOWN		11.966	12.329	13.468	11.443	13.027	12.45	12.857	12.26	12.415	12.033	11.538	11.451	12.274	12.038	10.053	9.9796	11.961	11.442	10.67	10.474	11.725	10.756	11.948	11.482	10.618	12.254
hsa-miR-16-2-3p	11.9636	11.1889	0.000488027	0.774655	1.71078	UP		10.858	11.118	11.513	11.161	10.53	10.979	11.715	10.691	11.883	11.483	11.37	10.686	11.596	11.062	11.123	11.368	12.799	12.18	11.771	11.663	12.544	12.519	12.282	12.224	11.114	11.976
hsa-miR-16-5p	20.0816	19.3419	0.00308639	0.739726	1.66986	UP		18.875	19.341	19.981	19.176	19.357	19.022	19.874	18.903	19.902	19.754	18.993	18.625	19.848	19.135	19.268	19.435	21.287	20.109	19.726	19.565	21.071	19.983	20.596	20.527	19.192	20.22
hsa-miR-17-3p	4.44578	6.33477	0.000615785	-1.88899	3.70375	DOWN		5.636	4.94	6.831	5.8892	6.3875	6.5617	6.3198	6.6297	6.2937	7.4351	6.0222	5.9827	7.4871	6.2711	4.2634	0	5.1122	4.3205	4.294	5.3773	5.0776	4.7039	4.4055	5.3516	3.4538	6.9896
hsa-miR-181a-2-3p	6.43824	7.34466	2.38532e-05	-0.906423	1.87439	DOWN		6.7957	7.7735	7.4354	7.542	7.4228	8.182	7.1448	8.1107	6.7349	7.1062	7.212	6.9097	6.9382	7.5174	6.4103	6.2992	6.3466	6.7847	6.852	7.031	6.1819	5.6043	6.2052	6.885	6.6966	5.9621
hsa-miR-181a-3p	5.6062	6.61099	2.71792e-05	-1.00479	2.00665	DOWN		6.4651	7.0859	6.3111	6.4634	7.283	7.0732	6.7349	6.8395	5.825	6.034	7.3531	6.8717	5.4313	6.7826	6.119	5.5684	4.8321	5.7355	5.4816	5.974	5.537	5.7512	5.2945	5.3516	6.3018	5.3277
hsa-miR-181b-2-3p	0	1.45486	0.00338084	-1.45486	2.74129	DOWN		2.4034	3.1928	2.3339	0	2.4999	3.4665	0	3.3692	0	0	0	3.1023	0	0	0	0	0	0	0	0	0	0	0	0	0	0
hsa-miR-181b-3p	0.958942	3.63271	0.000141564	-2.67377	6.38096	DOWN		3.1689	4.909	3.2725	2.9823	4.4999	4.0071	4.1292	3.9542	3.5176	4.8361	4.4145	3.6429	0	3.5238	0	0	0	0	0	0	3.4561	5.0449	0	0	3.0063	0
hsa-miR-1827	6.37914	5.12389	2.49766e-06	1.25526	2.3871	UP		4.8888	5.3162	5.1412	5.5471	4.3744	5.177	5.9094	4.9135	5.588	5.2081	5.1514	4.9648	4.8838	4.6707	4.8253	6.0362	6.4677	6.7153	6.2115	6.1491	6.9155	6.4408	7.228	6.7475	5.8507	6.9621
hsa-miR-183-3p	2.2911	4.10329	0.00162893	-1.81219	3.51176	DOWN		2.9883	3.2923	3.6069	3.2047	4.1166	4.3994	4.1906	4.1766	3.2832	5.6066	3.9291	4.5498	5.4313	4.6707	3.5715	0	3.6097	3.1505	0	3.4792	3.6626	0	3.458	2.8406	0	3.7211
hsa-miR-186-5p	10.0824	10.7823	0.000294856	-0.699869	1.62436	DOWN		10.525	10.843	11.389	10.871	11.356	10.443	11.075	10.474	10.708	11.057	10.385	10.357	11.026	10.443	9.5715	9.3038	10.533	10.234	9.7053	9.8093	10.856	10.114	10.442	10.291	9.5651	10.564
hsa-miR-188-3p	6.20941	2.51557	1.13573e-08	3.69384	12.9406	UP		3.1689	3.0859	2.3339	2.8567	3.0525	0	4.3605	3.5916	3.2832	0	3.4816	2.9648	0	3.0384	6.9479	5.8212	6.2726	6.3338	6.5835	6.3596	5.3995	7.0449	5.8794	6.2191	6.086	5.5654
hsa-miR-18a-3p	2.51368	4.23291	0.00646953	-1.71923	3.29261	DOWN		4.4034	3.1928	5.2725	4.0412	4.2078	3.4665	4.5598	4.0322	3.4436	6.1749	3.6071	3.7304	6.0902	3.0384	3.5715	0	0	0	4.031	4.2677	4.0036	0	3.8985	3.6061	3.3542	3.4316
hsa-miR-18a-5p	6.69176	7.81361	7.259e-05	-1.12186	2.17627	DOWN		7.5119	7.4782	8.8717	7.5822	7.6071	7.347	8.2092	7.3767	7.1499	8.8519	7.423	7.4438	8.8558	7.6822	6.3789	6.4732	5.4842	6.7652	6.446	6.7613	7.6322	6.8631	6.8404	7.4494	6.1318	7.0754
hsa-miR-1909-5p	4.5644	2.01306	0.000741507	2.55134	5.8618	UP		4.9394	4.7778	0	0	0	0	3.306	3.7842	3.003	0	4.4816	3.8908	0	0	5.2974	5.3357	4.9316	4.025	4.372	4.9267	5.778	5.4408	3.7381	3.6886	4.0704	3.1685
hsa-miR-190a-3p	0.264042	2.252	0.00179287	-1.98796	3.96675	DOWN		2.7819	0	4.0343	0	3.2369	3.5921	3.5125	3.3692	3.8961	0	3.4816	0	0	3.6234	0	0	0	0	0	0	0	0	0	0	0	3.1685
hsa-miR-193a-3p	3.3272	1.21402	0.00371894	2.11318	4.32643	UP		0	2.9704	0	0	2.6805	3.7076	3.6056	4.0322	0	0	0	0	0	0	4.4561	4.0138	0	3.9579	4.294	4.8778	3.4561	4.2564	0	3.6061	3.3542	3.654
hsa-miR-193b-5p	5.49577	4.08533	0.00463519	1.41044	2.65818	UP		4.1258	4.4729	3.5038	4.6827	3.5931	4.5307	4.7755	4.4281	4.325	4.2081	4.3441	4.9648	0	5.24	5.515	7.2712	4.5483	5.6949	6.1685	5.6345	4.2151	4.1189	6.5333	5.0105	6.4538	4.7852
hsa-miR-195-5p	12.323	11.6809	0.0045008	0.642071	1.56057	UP		11.225	11.628	11.782	11.654	10.922	11.628	12.121	11.305	12.103	12.369	11.657	11.184	12.564	11.391	11.51	11.725	13.257	12.523	12.028	12.018	12.94	12.891	12.632	12.538	11.515	12.299
hsa-miR-196a-3p	3.61754	1.98506	0.0064359	1.63248	3.10045	UP		3.0814	0	0	0	2.2935	3.7076	3.6056	3.7842	3.5176	4.0706	0	3.7304	0	0	3.778	3.7142	3.8321	3.3729	4.446	3.6048	3.3406	4.3819	3.458	3.1036	3.7948	2.5836
hsa-miR-196b-5p	8.52949	7.85014	0.00869417	0.679356	1.60142	UP		7.8363	7.0997	7.9897	7.2738	7.7952	7.9729	8.1213	7.9441	8.7975	8.7202	7.2021	7.3911	8.5497	7.2083	8.4141	8.2281	9.8465	8.0127	8.1014	8.0477	8.3406	8.0916	8.3266	9.0752	8.1762	9.6932
hsa-miR-197-3p	8.62903	9.39446	0.000188739	-0.765439	1.69989	DOWN		9.27	9.204	9.7024	9.3931	10.391	9.32	8.4353	9.258	9.0799	9.3597	9.6732	9.4226	9.5757	9.4376	8.7629	8.6577	7.7042	8.6317	9.087	9.3948	8.1903	8.4905	8.2129	8.8361	9.1337	8.4465
hsa-miR-197-5p	4.55786	3.24234	0.00946708	1.31552	2.48892	UP		3.6664	3.3855	2.7489	4.2047	3.0525	4.8145	3.6931	4.4847	2.7807	0	4.1096	4.3433	0	4.1088	5.0806	4.5988	5.3823	3.8875	3.446	4.8778	5.6383	4.4974	4.351	4.4256	4.2473	4.2617
hsa-miR-19a-3p	8.77667	10.0694	8.79046e-05	-1.29268	2.44983	DOWN		9.3737	11.157	10.529	10.159	10.237	8.8898	10.259	8.9567	9.8476	10.419	10.119	11.027	10.395	9.6022	8.7568	7.6504	10.022	8.2798	8.4141	8.0141	9.7387	8.9819	8.7721	8.6659	8.3639	9.6604
hsa-miR-19b-3p	10.337	11.3787	0.000201984	-1.04175	2.05872	DOWN		10.776	11.284	12.279	10.77	12.1	10.936	11.455	10.93	11.543	12.152	10.894	11.273	12.173	10.737	10.153	9.1937	11.299	10.05	9.9944	9.8637	11.288	10.43	10.498	10.271	9.9088	11.094
hsa-miR-20a-5p	11.2668	12.2526	2.53219e-06	-0.985738	1.98033	DOWN		12.136	12.225	13.14	11.982	12.26	11.879	12.542	11.867	12.109	12.722	11.883	12.126	12.706	11.959	11.06	10.885	11.424	11.059	11.006	11.149	12.197	11.022	11.606	11.774	10.609	11.411
hsa-miR-20b-5p	9.27399	10.0424	0.00228683	-0.768401	1.70338	DOWN		9.8579	9.9002	11.072	9.7282	10.179	9.7469	10.285	9.7297	9.9279	10.505	9.3463	10.258	10.469	9.5884	9.1261	8.5491	9.9745	9.4359	8.8417	8.8011	10.621	9.5249	9.5887	9.8707	8.1907	8.7635
hsa-miR-214-3p	4.19486	5.1854	0.0020816	-0.990542	1.98693	DOWN		6.7468	5.0859	4.2083	6.4417	3.6805	5.177	5.1292	5.5391	5.3042	5.6066	4.7771	5.2279	5.4313	4.24	3.778	5.1837	3.9316	4.025	4.879	5.0642	3.8431	4.4974	3.8985	3.9781	4.1907	3.069
hsa-miR-219a-1-3p	3.77952	1.71024	0.00412771	2.06929	4.1968	UP		2.4034	2.7074	0	2.8567	2.841	0	3.306	0	0	4.4491	5.3797	0	0	0	4.7291	4.1013	4.417	4.3729	4.446	4.5434	3.9256	4.4974	0	3.6061	3.4538	3.2617
hsa-miR-221-3p	10.985	11.6914	0.00110722	-0.706429	1.63176	DOWN		12.047	11.871	11.727	11.703	12.324	12.055	11.153	12.083	11.991	10.602	11.932	11.966	10.584	11.642	11.689	11.492	10.85	10.904	10.635	11.173	10.388	10.321	10.998	10.908	11.183	11.279
hsa-miR-222-3p	7.84403	8.65601	2.86738e-06	-0.811981	1.75562	DOWN		9.0151	8.8873	8.7031	8.9189	9.0151	8.7885	8.8817	8.877	8.7426	7.7259	8.8133	8.4177	8.0162	8.3818	8.233	8.2474	7.7594	8.025	7.372	8.0141	7.626	7.4694	7.7539	7.733	7.9647	7.9305
hsa-miR-22-3p	10.7288	11.2692	0.00937323	-0.540381	1.45436	DOWN		11.328	11.272	11.495	11.585	10.583	10.84	11.427	10.814	11.497	11.865	11.041	10.979	11.845	11.198	10.528	10.735	11.694	10.262	10.32	9.87	11.339	10.543	11.436	10.78	10.017	11.222
hsa-miR-224-5p	9.23293	7.64549	0.00118976	1.58744	3.00516	UP		6.9394	7.5753	8.1196	7.9365	7.5931	7.3994	6.5363	7.3916	9.7665	6.1062	8.9793	6.8426	6.3533	9.4978	10.173	9.3757	7.0359	9.8417	8.4279	8.7133	8.1903	9.5485	9.427	9.796	9.0899	11.176
hsa-miR-22-5p	4.61806	5.75591	3.47004e-08	-1.13786	2.20054	DOWN		5.6961	5.7605	5.5038	5.5871	5.5472	5.8898	5.6056	5.7384	5.5355	5.556	6.4316	6.1821	5.6428	5.9063	4.5715	4.8212	5.154	4.2094	4.7679	4.6636	4.7099	5.3205	4.8205	3.6886	4.0704	4.6192
hsa-miR-2355-5p	0.624358	2.79669	0.00151659	-2.17233	4.5075	DOWN		3.7253	4.1928	3.1412	3.3042	3.8785	0	3.413	3.4847	2.6551	0	4.4145	3.6429	0	3.3014	0	0	0	2.8875	0	4.6048	0	0	0	0	0	0
hsa-miR-23a-3p	12.2149	12.9695	0.000375907	-0.754583	1.68714	DOWN		13.128	13.183	12.952	12.732	14.03	13.328	12.465	13.324	12.81	12.229	13.242	13.084	12.227	12.839	12.748	12.197	11.515	12.154	12.585	12.929	11.815	12.1	11.941	11.951	12.776	11.868
hsa-miR-23b-3p	10.0718	10.7826	2.42589e-06	-0.710805	1.63672	DOWN		11.048	10.876	10.572	10.792	11.017	10.942	10.725	10.94	10.648	10.5	10.939	10.798	10.53	10.629	10.435	10.566	9.8094	9.9929	10.298	10.405	9.652	9.8359	9.9646	9.6671	10.671	9.5643
hsa-miR-23c	5.04936	6.36947	4.49932e-07	-1.32011	2.49686	DOWN		6.4302	6.6709	5.6315	6.0555	6.6963	6.8898	6.1292	6.8395	6.1957	6.1062	6.8925	6.5618	6.0902	5.9833	5.5435	4.8718	3.8321	5.025	5.4095	5.9024	4.7557	5.4408	4.6506	4.8406	5.7367	4.5836
hsa-miR-2681-3p	0.317792	2.60353	0.000890733	-2.28574	4.87613	DOWN		3.4737	0	2.7489	3.0978	3.6805	0	3.065	3.5916	3.5176	0	4.9291	3.3433	0	5.0019	0	0	0	3.8135	0	0	0	0	0	0	0	0
hsa-miR-26a-2-3p	7.24557	8.2294	4.17856e-05	-0.983825	1.9777	DOWN		7.961	8.4488	8.8042	8.4085	8.4526	8.7486	8.065	7.6911	7.8646	7.378	8.7398	8.1023	8.2494	8.2977	6.9586	6.9563	5.8827	7.7944	7.243	7.4627	6.9941	8.3127	7.1505	7.4612	7.5803	7.1504
hsa-miR-28-3p	9.49824	8.84125	0.00559731	0.656992	1.57679	UP		8.8463	9.0002	8.9717	9.5032	10.233	8.9671	7.9139	8.9937	8.982	7.793	8.9734	9.09	7.6591	8.8509	9.8398	9.7935	8.8608	9.6662	9.5078	9.7613	8.9455	9.6487	9.3649	9.412	9.9338	9.2446
hsa-miR-2909	3.12371	1.07202	0.00227567	2.05169	4.1459	UP		2.4034	0	0	2.9823	0	0	0	0	3.1026	0	3.3441	0	0	3.1759	3.5715	0	3.6097	3.5656	4.1241	4.6048	3.0776	4.7039	0	3.2191	3.9392	3.069
hsa-miR-296-5p	3.66989	5.1561	0.00868246	-1.48621	2.80152	DOWN		4.5077	5.7253	5.1583	4.6452	4.6374	5.5307	5.9979	5.4847	4.2832	5.9186	4.3441	5.3978	5.8838	4.6707	3.778	0	4.9789	3.7355	4.8245	3.4792	5.778	0	4.695	3.9781	4.0704	4.7211
hsa-miR-298	3.67979	0.643343	2.99164e-06	3.03645	8.20469	UP		0	0	0	0	2.178	0	0	3.4847	0	0	3.3441	0	0	0	4.5715	3.5988	4.2726	3.8875	3.9314	4.0198	3.4561	4.4974	0	3.2191	4.3542	4.3491
hsa-miR-29a-3p	10.5114	11.3256	0.00236728	-0.814155	1.75827	DOWN		11.158	11.495	11.872	10.627	12.996	12.052	11.789	11.871	10.471	10.347	10.902	11.487	10.61	10.881	10.424	10.672	9.56	10.535	10.903	10.987	10.216	10.595	10.43	10.309	10.906	10.6
hsa-miR-29c-5p	4.64473	5.95436	0.00596144	-1.30962	2.47877	DOWN		5.8888	5.494	6.7823	6.0267	7.1008	6.1969	6.1906	6.1766	5.7807	5.6066	6.0666	5.3433	5.1833	5.5238	5.6785	4.968	5.3101	5.266	5.5164	5.2292	4.885	0	4.11	5.0733	5.1907	4.5096
hsa-miR-302e	8.88473	7.77786	3.48917e-07	1.10687	2.15378	UP		7.5892	7.8284	7.2001	7.7011	7.3278	8.1364	7.4321	8.2721	7.4903	8.1237	7.7016	8.4373	8.172	7.478	9.3057	8.9504	9.0526	8.6949	9.1464	8.8747	8.6353	9.8332	8.714	8.3735	8.7829	8.2532
hsa-miR-3064-3p	3.44318	0.940914	0.00237879	2.50227	5.66576	UP		2.5409	0	0	0	0	0	0	0	3.3656	0	0	3.6429	0	3.6234	3.193	5.6577	0	4.4236	5.0783	4.1073	0	5.4408	4.8601	3.8406	4.7168	0
hsa-miR-30b-5p	6.91404	7.91706	0.000332082	-1.00302	2.00419	DOWN		7.4737	7.9285	9.4354	7.3281	9.4052	7.2359	7.6931	7.2272	7.5355	8.0433	7.9588	7.3844	8.1833	8.0065	6.4103	6.3176	6.1946	7.3138	6.5335	6.9505	7.363	7.3668	6.908	7.0185	6.9815	7.6104
hsa-miR-30c-5p	9.29798	10.2918	1.84462e-05	-0.993854	1.9915	DOWN		10.074	9.8932	11.153	9.5559	11.637	10.231	10.472	10.216	9.8883	10.426	10.086	9.8302	10.464	10.159	9.1402	8.5097	9.1566	9.6504	9.1353	9.5512	9.9845	9.3439	9.3614	8.9131	9.5734	9.256
hsa-miR-3118	0.588825	4.47891	2.21305e-07	-3.89008	14.8263	DOWN		4.9394	5.0579	3.9188	5.0412	3.8785	5.1364	5.065	4.4847	4.4436	4.556	5.6946	4.9648	0	5.5238	0	0	0	0	0	0	0	0	0	0	3.6343	3.4316
hsa-miR-3124-5p	5.56092	4.82362	0.00229713	0.737295	1.66705	UP		4.7819	4.0293	3.7933	5.1252	4.0193	4.8145	4.5125	4.8717	5.003	5.5035	4.666	5.3433	5.8272	5.24	5.4858	6.3888	5.8321	5.238	5.294	5.6636	5.3704	6.4408	5.8004	5.4256	5.0063	4.7852
hsa-miR-3129-5p	2.15681	4.74071	6.99404e-05	-2.5839	5.99558	DOWN		5.0356	4.94	3.9968	5.0412	4.451	4.5307	4.3605	4.3692	4.622	4.6555	4.5457	5.7926	4.5053	5.5238	3.3305	0	3.9316	3.3729	0	3.8271	0	4.8844	0	3.1036	0	3.4316
hsa-miR-3138	5.41369	4.56124	0.000503151	0.852449	1.80556	UP		4.8628	3.7778	3.3927	4.7896	4.7428	4.651	3.1906	4.9135	5.1957	5.141	4.5457	5.5255	4.5053	4.6234	5.5715	6.1837	5.3466	5.0574	5.3335	5.4792	5.3406	5.1189	5.6279	5.3516	5.5913	4.9621
hsa-miR-3145-3p	3.10182	0.678593	0.00151174	2.42322	5.36368	UP		0	0	2.7489	3.6452	0	0	0	3.1062	0	0	0	0	0	0	0	3.7142	0	6.3338	3.9314	3.8271	3.3406	5.1189	3.2356	3.2191	4.5011	0
hsa-miR-3152-5p	5.66599	3.24796	4.92238e-05	2.41803	5.34442	UP		3.4737	0	2.2083	2.7192	2.5931	4.7076	4.306	3.5916	3.4436	4.6555	4.5457	4.3433	4.8838	0	5.9372	5.8212	5.5483	5.6949	5.5164	5.6636	5.6137	7.1893	5.458	5.2191	5.4538	4.8764
hsa-miR-3154	3.30374	1.25597	0.00552502	2.04777	4.13466	UP		0	0	0	0	3.5931	0	3.6931	0	3.003	0	4.1921	3.1023	0	0	4.193	3.3357	3.4842	3.4725	4.5164	5.1897	0	0	3.5575	3.6886	4.3018	3.9055
hsa-miR-3168	5.49303	8.10931	0.000223246	-2.61628	6.13167	DOWN		10.367	8.6262	7.7118	9.4512	4.915	8.4123	9.5065	8.4777	8.1701	6.9966	7.917	8.1467	6.9113	7.921	9.8935	6.968	6.0908	5.1202	4.1241	3.8271	5.148	5.8844	6.3088	4.9781	3.4538	4.1196
hsa-miR-3169	0.287167	3.59935	2.00376e-06	-3.31218	9.93268	DOWN		3.605	3.7074	3.8364	4.5672	3.2935	4.651	3.9275	4.6911	4.1499	0	4.666	4.4502	0	4.8457	0	0	0	0	3.446	0	0	0	0	0	0	0
hsa-miR-320a	12.1892	12.668	0.00825822	-0.47875	1.39354	DOWN		12.722	12.454	12.565	12.908	12.184	12.995	12.524	12.934	13.205	12.899	12.312	12.4	12.889	12.361	12.303	12.629	12.838	11.709	11.962	11.648	12.271	11.104	12.42	12.266	12.152	12.969
hsa-miR-326	5.64638	6.62787	8.85084e-05	-0.981488	1.9745	DOWN		7.1899	6.494	7.025	5.7896	7.5356	6.607	5.0319	6.75	6.4718	6.53	7.0774	6.919	6.5757	6.7933	6.1379	5.5988	5.3823	5.4482	6.3139	5.9024	5.2792	6.2232	5.351	5.0733	5.6762	5.3702
hsa-miR-338-3p	7.10402	7.84641	0.00867832	-0.742391	1.67295	DOWN		7.7644	7.7948	7.9608	8.5058	10.232	7.347	7.932	7.2841	7.8214	7.2878	7.941	7.3433	7.1375	7.4978	7.272	7.1635	6.1122	7.6793	7.4728	7.6418	6.778	7.4408	6.7591	6.8674	7.4598	6.6015
hsa-miR-339-3p	6.41796	7.36591	8.40073e-06	-0.947949	1.92913	DOWN		6.4477	7.6095	7.6162	7.2615	7.4665	7.577	6.9893	7.4353	7.1146	8.2564	6.9994	7.6029	8.0413	6.7051	6.2974	6.3537	6.6541	5.975	6.3139	6.1073	6.6864	6.0824	6.7274	6.6785	6.0704	7.069
hsa-miR-339-5p	6.67307	7.98174	1.23204e-06	-1.30867	2.47713	DOWN		7.7853	8.3367	8.5659	7.7147	8.9003	8.2068	6.65	8.2189	7.5707	7.9775	8.3259	8.0048	7.5757	7.9112	7.119	6.2426	6.4341	6.7254	7.031	6.974	6.3103	6.1545	6.3921	6.911	7.7268	6.0561
hsa-miR-340-3p	3.27362	4.7902	0.00193106	-1.51658	2.86113	DOWN		4.1689	4.2434	5.0527	5.0697	4.915	4.651	4.9979	5.0322	5.1026	4.3336	5.1514	4.7722	5.2708	4.3014	3.5715	3.4732	3.3466	4.5198	0	4.2677	4.3406	0	4.1742	3.326	4.2473	4.0165
hsa-miR-340-5p	10.1047	9.53274	0.00768475	0.571948	1.48653	UP		9.4123	9.8673	9.7089	9.795	10.618	9.1569	9.0793	9.2701	9.8996	8.743	10.132	9.3381	8.618	9.8198	10.449	9.8419	9.5045	10.096	10.174	10.462	9.8563	11.135	9.8527	9.9206	10.271	9.6932
hsa-miR-342-5p	2.71833	5.01908	0.00033293	-2.30075	4.92712	DOWN		4.3293	5.3855	4.3927	5.1787	5.8504	5.2166	5.3335	4.9135	4.5532	5.141	5.2701	4.6429	4.8838	5.1759	3.9586	4.0138	0	4.266	0	4.1897	4.0776	0	4.351	4.0422	0	3.7211
hsa-miR-345-3p	0.89125	3.37105	0.000544026	-2.4798	5.5782	DOWN		3.8363	3.1928	3.0708	2.9823	3.7223	4.0946	4.9275	3.8717	0	4.9186	4.7226	3.8908	0	3.9644	3.5715	0	0	0	0	3.6048	0	0	0	3.5187	0	0
hsa-miR-345-5p	5.80105	7.00645	1.51091e-06	-1.2054	2.30601	DOWN		6.6739	7.0789	7.7347	6.6827	8.3496	7.2359	7.0319	7.2021	7.1146	6.7028	6.362	6.6653	6.798	6.4579	5.599	5.0582	5.451	6.266	6.2326	6.3948	5.8001	5.6043	5.2653	5.7475	6.1907	6.0031
hsa-miR-3611	2.02117	4.01674	0.00113821	-1.99557	3.98773	DOWN		4.2107	3.3855	3.2725	3.6452	3.5472	4.0071	3.065	3.6911	3.9506	5.556	5.3076	2.9648	5.2708	4.3603	3.193	0	3.7252	3.7355	0	0	0	4.1189	3.351	0	2.8688	3.2617
hsa-miR-3613-5p	9.44632	10.4864	3.30535e-05	-1.04003	2.05628	DOWN		10.456	10.896	10.388	10.642	10.357	10.11	10.876	10.188	10.718	11.096	9.941	9.8729	10.992	10.276	9.0854	8.6862	10.837	9.1297	9.1014	8.7813	10.001	9.2358	9.8218	9.9302	8.9088	9.8372
hsa-miR-3616-3p	4.34545	0.42825	5.01031e-08	3.9172	15.1076	UP		2.4034	0	0	0	0	3.5921	0	0	0	0	0	0	0	0	5.041	4.7687	5.154	4.9579	4.9314	5.2677	3.9256	0	4.1742	4.3766	5.3798	4.1685
hsa-miR-3618	2.68167	0.605457	0.00124089	2.07621	4.21698	UP		0	3.3855	0	0	1.915	0	0	0	0	0	0	0	0	3.1759	3.4561	3.3357	0	3.1505	3.709	3.3417	3.6626	4.2564	0	0	4.0063	3.2617
hsa-miR-362-3p	0.311292	2.22622	0.00139189	-1.91493	3.77095	DOWN		2.6664	3.2923	2.6558	0	2.6805	0	3.6931	3.1062	2.5176	0	4.4145	3.1023	0	3.0384	0	0	0	3.7355	0	0	0	0	0	0	0	0
hsa-miR-3656	5.3637	4.78284	0.00458953	0.580864	1.49574	UP		5.3852	5.1134	4.9387	4.6068	3.9506	4.5921	5.0975	4.4847	4.8104	4.2081	4.5457	5.1975	5.1833	4.8457	5.515	5.4061	6.154	4.4236	5.7388	4.6636	5.7099	5.9669	5.5086	5.3766	5.2473	4.654
hsa-miR-3669	0	4.37429	2.27558e-10	-4.37429	20.7392	DOWN		4.8888	5.2923	3.9968	4.7549	3.6374	4.4665	5.1292	3.9542	3.6551	4.556	6.0666	5.3708	0	5.4714	0	0	0	0	0	0	0	0	0	0	0	0
hsa-miR-3674	7.19372	8.40514	5.24096e-06	-1.21141	2.31564	DOWN		8.5409	8.4835	7.3999	8.4607	7.5089	8.6795	8.2203	8.5884	7.6995	8.8255	8.9321	9.2316	8.6911	8.41	7.7291	7.4567	7.002	6.7944	7.7894	7.3052	6.626	8.2232	7.1663	6.7571	6.9563	6.519
hsa-miR-3679-3p	0.587558	4.83529	1.13749e-10	-4.24773	18.9975	DOWN		4.6961	5.0579	4.2407	4.6452	4.5931	4.651	5.065	4.3078	3.8961	4.9186	5.2316	5.1347	5.4313	5.825	0	0	0	0	3.709	3.3417	0	0	0	0	0	0
hsa-miR-3682-5p	2.6073	0.544743	0.00300726	2.06256	4.17726	UP		0	0	2.2083	0	2.0525	0	0	0	3.3656	0	0	0	0	0	3.193	0	3.6097	4.266	3.709	4.4792	0	4.1189	0	0	2.8688	5.043
hsa-miR-3688-3p	4.82134	3.00976	0.00164129	1.81158	3.51028	UP		4.605	3.0859	3.9968	4.0412	3.1166	0	4.5598	0	4.1499	4.556	3.3441	3.6429	0	3.0384	5.193	4.8212	5.154	4.9918	4.879	4.6636	5.563	4.9669	3.8985	4.8762	4.3018	4.5471
hsa-miR-372-3p	4.60562	0.209107	6.87645e-14	4.39652	21.0612	UP		0	0	0	0	0	0	2.9275	0	0	0	0	0	0	0	4.041	5.4732	4.5483	4.851	4.5835	4.5434	4.563	6.1545	4.5086	3.9781	4.3018	3.7211
hsa-miR-374a-5p	9.6232	10.7024	4.39975e-05	-1.07919	2.11284	DOWN		10.87	11.11	11.8	10.862	10.88	9.7248	10.845	9.6986	10.237	10.849	10.616	10.651	10.73	10.96	9.3223	9.4834	8.1694	9.3154	9.4969	9.6491	9.9118	9.8844	9.9635	10.513	9.8404	9.9288
hsa-miR-376b-3p	1.04472	3.00461	0.00678783	-1.95989	3.89032	DOWN		5.1899	3.3855	2.4493	4.2047	3.841	0	3.065	3.4847	3.4436	0	3.4816	5.1023	0	4.4169	0	0	0	0	0	0	3.3406	0	0	2.8406	3.0063	3.3491
hsa-miR-377-3p	0	2.53469	0.000418062	-2.53469	5.79451	DOWN		5.636	0	2.9188	4.6827	2.4999	0	0	3.1062	5.2832	0	3.8295	4.2279	0	3.3014	0	0	0	0	0	0	0	0	0	0	0	0
hsa-miR-378b	1.11667	3.16451	0.00557149	-2.04785	4.13489	DOWN		3.5409	4.0293	3.8782	3.6452	3.4004	3.8145	4.1906	4.1766	4.3656	4.3336	0	4.9283	0	0	3.193	0	3.3466	0	0	3.3417	0	0	0	3.5187	0	0
hsa-miR-378c	6.63693	7.09785	0.00344262	-0.460917	1.37642	DOWN		6.5971	7.4353	7.1326	7.597	7.3875	7.4747	6.639	7.6608	7.0599	7.2081	6.7226	6.8523	7.0162	6.5868	7.289	5.8964	6.8951	6.4482	6.6159	6.9505	6.4422	6.4408	6.6048	6.5955	6.7853	6.6795
hsa-miR-3915	5.64217	4.55694	0.00298576	1.08522	2.1217	UP		3.8888	4.6334	2.9188	4.6068	2.6805	5.0515	4.1292	4.8717	3.9506	6.3925	4.666	4.7304	6.3126	4.9644	6.2634	5.6577	5.7526	5.851	6.031	5.9267	5.8642	6.1189	5.2356	5.0422	5.2748	4.6879
hsa-miR-3934-3p	0.8745	3.29004	0.000686964	-2.41554	5.3352	DOWN		3.1689	3.5554	2.5562	3.0978	2.841	4.5307	4.6056	4.6911	4.003	0	4.5457	3.8908	0	4.5744	0	3.9207	0	0	0	0	0	0	0	3.2191	3.3542	0
hsa-miR-3943	4.03185	1.48176	0.00016732	2.55009	5.85669	UP		3.3293	2.9704	0	3.2047	2.4999	0	4.5125	0	0	0	0	4.2279	0	0	5.0806	3.8212	3.4842	4.775	4.6476	4.5434	3.7557	5.2564	3.2356	3.1036	3.7168	2.9621
hsa-miR-422a	0.542058	2.1748	0.00617137	-1.63274	3.10102	DOWN		2.6664	2.8449	2.2083	2.7192	0	3.4665	3.065	3.5916	0	0	3.4816	3.1023	0	3.3014	0	0	0	3.1505	0	0	0	0	0	0	3.3542	0
hsa-miR-423-3p	8.66207	9.17517	0.000960215	-0.513105	1.42712	DOWN		9.2737	9.2152	9.5603	9.0768	10.077	9.0071	8.4667	9.0155	8.9013	9.158	9.0936	9.4389	9.066	9.1023	9.0107	8.9416	8.5444	8.7405	8.5207	9.1619	8.3481	8.1189	8.3159	8.9822	8.8183	8.4416
hsa-miR-423-5p	14.2556	13.2768	5.2117e-06	0.978797	1.97082	UP		13.078	13.222	13.038	13.086	12.83	13.813	12.987	13.671	13.784	13.524	12.857	12.923	13.749	13.313	14.139	14.362	15.306	13.846	14.046	14.049	14.506	13.272	14.597	14.444	14.023	14.477
hsa-miR-4268	2.45999	4.13989	0.0048409	-1.6799	3.20406	DOWN		2.6664	3.8449	3.7489	3.0978	3.8025	4.9613	3.8535	4.8286	3.4436	4.9186	4.9764	4.5498	4.6428	4.6234	3.778	0	3.9316	3.8875	3.5835	0	0	4.4974	0	3.7666	3.3542	2.7211
hsa-miR-4274	4.14119	2.11491	0.000548491	2.02628	4.07352	UP		2.8888	0	0	3.3042	2.915	0	4.1292	3.7842	3.1026	0	3.3441	3.1023	0	3.0384	3.5715	3.9207	4.9316	4.653	3.5835	5.1491	4.2151	4.7039	3.351	3.8406	4.1907	3.5836
hsa-miR-4291	1.55527	0	0.00617109	1.55527	2.93888	UP		0	0	0	0	0	0	0	0	0	0	0	0	0	0	3.6785	0	0	3.8875	3.709	0	0	4.3819	0	0	3.0063	0
hsa-miR-4318	0	6.266	2.58173e-18	-6.266	76.958	DOWN		6.3293	6.2923	4.4493	6.5672	4.321	7.1261	6.6168	6.5656	5.588	6.793	7.1096	6.709	7.1141	6.1427	0	0	0	0	0	0	0	0	0	0	0	0
hsa-miR-4325	5.29325	4.68306	0.00516273	0.610186	1.52646	UP		4.4737	3.9704	5.0343	3.9209	4.321	4.762	5.4882	4.4281	4.5532	4.9966	4.6071	4.7722	5.2708	4.9644	4.515	4.4732	5.6097	5.7355	5.031	4.974	6.148	5.797	5.6279	5.5848	4.5913	5.4316
hsa-miR-4328	0	2.36986	4.32183e-05	-2.36986	5.1689	DOWN		3.1689	3.0859	2.0708	3.2047	2.9854	3.914	0	3.2437	3.1957	0	4.3441	3.9648	0	0	0	0	0	0	0	0	0	0	0	0	0	0
hsa-miR-4440	5.77494	2.56843	3.76901e-06	3.20651	9.23117	UP		3.7819	3.0859	2.8364	3.5672	3.8025	3.5921	4.5598	3.8717	2.8961	0	0	0	0	3.9644	5.8484	6.4061	5.8827	5.8875	5.7388	5.4792	4.6137	7.5249	5.4055	5.2466	5.7563	5.5096
hsa-miR-4443	4.88648	2.97622	0.00142644	1.91025	3.75875	UP		3.9883	2.8449	2.9968	2.7192	4.0849	4.4665	4.3605	4.7842	0	0	3.6071	4.3978	0	3.4169	5.5715	4.2617	5.8321	4.266	5.6787	5.5116	4.6137	5.1189	4.351	4.1625	5.1015	4.1685
hsa-miR-4446-3p	4.41668	1.73342	6.89631e-05	2.68326	6.42306	UP		3.0814	4.4729	2.6558	0	3.3479	0	0	0	2.7807	0	0	3.8908	0	4.0384	4.4561	5.4401	4.3466	4.0891	5.2534	3.9267	4.563	5.1189	4.1742	3.8406	4.0063	3.7852
hsa-miR-4451	4.74964	2.89272	0.00160131	1.85692	3.62234	UP		2.9883	3.909	2.0708	3.3042	2.841	4.177	0	4.0322	3.588	0	5.514	4.0352	0	4.0384	5.0806	5.2233	5.154	4.4236	4.8245	4.7202	3.7557	5.2564	4.5575	4.2191	5.1616	4.6192
hsa-miR-4454	5.45982	6.9393	5.35686e-06	-1.47948	2.78849	DOWN		7.1847	6.7164	8.3999	6.2302	7.4969	7.1364	6.7141	7.1936	6.622	6.2405	7.3168	7.4243	5.8272	6.6472	5.8018	4.1013	4.8827	5.266	4.5164	5.7747	5.8642	5.6043	5.8404	6.2052	5.9898	5.671
hsa-miR-4485-3p	1.32731	0	0.00610833	1.32731	2.50934	UP		0	0	0	0	0	0	0	0	0	0	0	0	0	0	0	0	3.8321	2.8875	0	0	3.0776	0	0	0	2.8688	3.2617
hsa-miR-4505	3.00281	0.755471	0.000746653	2.24734	4.74806	UP		3.2513	0	0	0	0	0	3.5125	0	0	0	0	3.8128	0	0	3.4561	3.7142	0	3.5656	4.031	3.9267	3.563	0	3.11	3.1036	4.3018	3.2617
hsa-miR-4510	11.0277	7.19371	1.39153e-17	3.83396	14.2606	UP		7.0122	7.2983	7.1326	7.4362	6.5238	7.4165	7.9002	7.3078	7.2937	7.3486	7.3885	6.6541	7.0162	6.9833	9.8851	11.204	10.858	11.51	10.882	10.785	11.6	10.949	11.385	11.66	10.381	11.233
hsa-miR-4512	4.03446	1.59234	0.000331991	2.44212	5.43441	UP		3.2513	0	0	4.0978	0	3.7076	3.8535	0	0	0	4.3441	0	0	3.0384	4.193	4.0138	4.8321	3.9579	4.9314	4.7747	3.6626	4.3819	3.9725	3.4256	3.0063	3.2617
hsa-miR-4516	7.13308	5.6597	0.00471837	1.47338	2.77672	UP		4.1258	5.1928	4.0708	5.9365	5.451	7.0732	6.6609	7.088	4.7807	7.6066	4.4145	3.4502	7.6911	5.6937	6.5005	7.465	8.5639	6.1202	7.525	7.4792	7.4139	7.6425	7.3785	6.0265	8.0704	5.4114
hsa-miR-451a	14.0104	15.0955	0.000807023	-1.08508	2.1215	DOWN		14.695	15.74	16.372	14.427	15.341	14.721	15.557	14.713	15.68	15.288	14.764	14.415	15.291	14.333	12.622	12.739	14.642	13.994	13.694	13.436	14.763	13.85	15.012	14.762	13.616	14.995
hsa-miR-4635	5.70743	4.21437	1.10098e-07	1.49305	2.81484	UP		3.9394	3.0859	3.9968	4.0978	3.6805	4.8145	4.3605	4.4847	3.6551	4.6555	4.9291	4.7722	4.6428	3.8864	5.9796	6.1013	5.9789	6.1354	5.879	5.9024	5.5106	6.1189	4.5086	5.6886	5.3798	5.306
hsa-miR-4640-5p	0.813533	3.65101	1.53328e-05	-2.83748	7.14771	DOWN		3.7819	3.7778	3.6069	4.0412	2.5931	4.5921	4.065	4.5916	3.1026	4.3336	4.7771	4.2279	0	3.6234	3.3305	0	0	0	0	0	0	0	0	2.9781	3.4538	0
hsa-miR-4646-3p	6.18092	4.7556	0.000352471	1.42533	2.68575	UP		5.0587	4.4298	3.7031	4.4417	3.763	4.9613	4.7755	4.9937	5.173	5.3925	4.7226	5.3153	5.4313	4.4169	5.9796	7.8212	3.8321	6.7847	6.5998	6.8142	4.8431	6.9868	6.9815	6.0578	6.6237	4.8466
hsa-miR-4650-5p	3.81275	1.52359	0.000591499	2.28916	4.8877	UP		2.7819	3.7074	0	3.3042	2.2935	0	0	0	3.1026	0	0	3.1023	0	3.0384	4.9586	4.1837	4.1946	3.3729	4.372	3.8271	3.3406	4.3819	0	4.7281	4.1318	4.2617
hsa-miR-4651	4.53765	3.37506	0.00483714	1.16259	2.23859	UP		2.5409	4.0859	2.8364	4.0412	2.5931	4.651	3.065	3.9542	3.1957	4.556	3.3441	4.5009	0	3.8864	4.8253	4.8212	3.9316	4.9579	4.8245	4.6636	5.3406	4.797	4.0429	4.4729	4.1907	3.5836
hsa-miR-4655-5p	5.17107	3.22956	0.000165119	1.9415	3.84105	UP		3.605	3.7778	2.7489	3.4848	3.1166	4.4665	4.1906	4.3692	3.4436	0	4.0222	4.1023	0	3.8864	5.515	4.4061	4.4842	5.2094	5.5164	5.1491	5.4561	6.0449	5.1425	5.0422	5.0704	5.0165
hsa-miR-4659a-3p	0.240625	1.8099	0.00684044	-1.56928	2.96756	DOWN		3.0814	2.7074	3.2083	0	2.4004	3.5921	3.6931	3.6911	0	0	0	2.9648	0	0	0	0	0	2.8875	0	0	0	0	0	0	0	0
hsa-miR-4661-5p	4.34803	3.01356	0.0056119	1.33447	2.52183	UP		4.7538	3.5554	2.2083	3.4848	2.6805	3.8145	3.8535	3.4847	2.8961	0	3.3441	3.8128	0	4.3014	4.193	4.5988	4.4842	4.3729	5.2115	4.5434	4.3406	4.9669	2.9725	3.911	4.1907	4.3909
hsa-miR-4677-5p	4.15913	2.65509	0.00297046	1.50404	2.83636	UP		2.5409	0	3.2083	2.7192	3.178	3.4665	4.5598	3.5916	2.8961	0	3.6071	4.2279	0	3.1759	4.119	4.968	4.0247	4.266	4.031	4.1897	3.7557	4.4974	3.7381	3.7666	4.0063	4.5471
hsa-miR-4682	3.41442	1.17363	0.000730047	2.24079	4.72655	UP		2.4034	0	0	0	3.1166	0	3.8535	0	0	0	3.6071	3.4502	0	0	4.626	3.3357	3.8321	3.266	3.9314	4.6048	3.3406	0	4.2945	3.4256	3.3542	2.9621
hsa-miR-4683	5.0437	5.77239	0.00308873	-0.728693	1.65714	DOWN		5.5892	5.6522	4.8782	5.9823	4.1166	6.4165	6.235	6.2761	5.4051	5.9966	6.0445	6.3011	6.1375	5.7826	5.119	5.1013	5.5483	5.3729	5.372	5.1897	4.0776	5.4974	4.351	5.0733	5.2748	4.5471
hsa-miR-4687-5p	5.28109	3.82964	0.00129018	1.45146	2.73484	UP		3.9394	3.4729	2.9968	4.2553	3.0525	4.5307	5.065	4.5391	4.1026	4.3336	4.8801	4.7304	0	3.7165	5.9372	5.3714	5.5793	5.4725	5.5835	5.4792	4.6137	6.1893	4.695	4.326	5.4049	4.7211
hsa-miR-4724-3p	0.278475	2.42362	0.00233402	-2.14515	4.42337	DOWN		0	0	0	3.2047	0	3.329	2.9275	3.3692	2.6551	4.556	4.4816	0	4.9907	4.4169	0	0	0	0	0	3.3417	0	0	0	0	0	0
hsa-miR-4726-3p	2.23312	4.18209	0.000604193	-1.94897	3.86099	DOWN		4.2909	3.5554	2.0708	4.2047	3.8785	4.5921	3.8535	4.5916	3.8395	4.7486	4.8801	4.8128	4.9907	4.24	3.193	0	3.3466	2.8875	3.5835	0	0	0	3.2356	3.5187	3.2473	3.7852
hsa-miR-4730	5.23416	4.23566	0.0013782	0.998501	1.99792	UP		4.2909	3.3855	3.3927	4.1522	2.841	4.177	4.65	3.7842	4.1957	5.5035	4.7771	4.6873	5.3533	4.1088	5.1565	4.7687	5.8061	6.025	5.9314	5.0642	5.3103	6.2888	4.5086	4.7281	5.0063	4.2159
hsa-miR-4734	2.95956	1.1455	0.00844917	1.81406	3.5163	UP		3.0814	0	2.3339	0	2.2935	0	3.6056	0	0	0	4.7226	0	0	0	3.9586	0	3.3466	3.4725	3.9314	3.4792	3.3406	5.0449	3.351	0	2.8688	2.7211
hsa-miR-4744	1.84813	4.89839	1.30525e-05	-3.05025	8.28357	DOWN		4.5077	4.6709	4.1752	5.0412	4.178	4.8651	6.0485	5.2437	3.7193	4.8361	5.3797	5.8523	4.8838	5.1759	3.3305	0	0	3.7355	0	4.1073	0	4.7039	0	0	3.4538	2.8466
hsa-miR-4747-5p	2.05442	0.396564	0.00779275	1.65786	3.15548	UP		0	0	2.4493	0	0	0	0	0	3.1026	0	0	0	0	0	0	0	3.7252	3.7355	3.5835	0	4.148	0	3.351	3.1036	3.0063	0
hsa-miR-4748	5.01472	3.83046	0.00833312	1.18426	2.27247	UP		3.8888	4.5949	3.9583	3.8567	3.4999	3.5921	3.1906	0	5.0783	4.9966	4.9764	2.9648	4.9907	4.0384	4.119	4.1013	4.8827	4.775	5.1685	4.7747	4.6626	6.0064	5.6506	4.8762	5.3282	5.8315
hsa-miR-4760-3p	0.49585	3.99811	6.10908e-06	-3.50226	11.3314	DOWN		5.3482	4.3855	3.3927	4.6452	3.5472	5.4334	4.6056	5.3692	4.1499	0	5.0222	5.0004	0	5.074	0	0	0	0	0	0	0	0	0	3.1036	0	2.8466
hsa-miR-4762-5p	0	2.27739	0.000236556	-2.27739	4.84801	DOWN		3.1689	0	2.8364	3.5672	2.4999	4.0071	0	3.8717	0	0	4.0222	4.2867	0	3.6234	0	0	0	0	0	0	0	0	0	0	0	0
hsa-miR-4766-5p	1.16448	2.83949	0.00929287	-1.67501	3.19321	DOWN		3.4737	2.9704	2.5562	3.2047	2.763	3.329	3.413	3.2437	3.003	0	3.3441	4.0352	0	4.4169	0	0	0	3.3729	3.5835	0	3.7557	0	0	0	0	3.2617
hsa-miR-4779	2.36606	0.390671	0.00167442	1.97539	3.93234	UP		0	0	0	0	2.2935	0	0	0	0	0	0	0	0	3.1759	3.778	0	0	3.4725	3.446	3.6048	0	4.4974	0	2.9781	3.5469	3.069
hsa-miR-4782-5p	1.48173	5.32089	1.88593e-07	-3.83915	14.312	DOWN		5.5244	5.494	4.7031	5.3973	4.451	4.914	5.4636	4.5916	4.325	5.3925	6.7903	5.8523	5.3533	6.24	3.4561	4.0138	3.4842	3.9579	0	0	0	0	0	0	2.8688	0
hsa-miR-4789-5p	0	1.68352	0.00399186	-1.68352	3.21211	DOWN		2.4034	3.7074	2.2083	0	0	3.329	0	4.3078	0	0	3.7226	3.8908	0	0	0	0	0	0	0	0	0	0	0	0	0	0
hsa-miR-4795-3p	1.45857	3.48001	0.00240845	-2.02144	4.05989	DOWN		3.0814	3.2923	2.3339	4.4417	3.0525	3.914	3.6931	4.1766	4.1026	4.0706	4.8801	3.9648	0	3.7165	3.8711	0	3.9316	3.1505	3.709	0	0	0	0	2.8406	0	0
hsa-miR-4796-5p	0	2.15361	0.00120159	-2.15361	4.44939	DOWN		0	0	0	0	2.178	3.914	3.413	3.7842	4.003	0	4.2701	3.5498	0	5.0384	0	0	0	0	0	0	0	0	0	0	0	0
hsa-miR-4800-5p	5.04173	4.04123	0.00113939	1.0005	2.0007	UP		4.5077	4.2434	2.8364	4.2553	2.841	4.0946	3.5125	4.1766	4.9236	4.6555	4.666	3.6429	5.1833	3.0384	5.5715	5.5057	4.4842	4.6949	5.2115	5.8271	4.3406	6.0824	4.5575	4.3766	4.8323	5.0165
hsa-miR-4804-5p	0	1.24827	0.00902532	-1.24827	2.37557	DOWN		0	0	2.3339	0	2.4999	3.329	2.9275	0	3.2832	0	0	3.1023	0	0	0	0	0	0	0	0	0	0	0	0	0	0
hsa-miR-487b-5p	4.75505	4.15671	0.00409221	0.598336	1.51397	UP		3.2513	3.7778	3.8364	4.1522	3.8785	4.255	4.065	4.3692	4.4436	4.2081	4.4145	4.0352	4.8838	4.6234	4.778	3.7142	4.6686	5.0574	5.2534	4.0198	5.3103	5.3205	4.936	4.648	4.0704	5.284
hsa-miR-495-3p	0	2.32364	0.000236929	-2.32364	5.00595	DOWN		4.6664	2.9704	0	3.2047	2.5931	3.8145	0	3.6911	3.8961	0	0	3.8908	0	3.8039	0	0	0	0	0	0	0	0	0	0	0	0
hsa-miR-497-3p	3.90048	0	1.37742e-10	3.90048	14.9335	UP		0	0	0	0	0	0	0	0	0	0	0	0	0	0	4.778	4.4061	4.417	4.266	4.7679	4.6048	3.3406	0	2.9725	4.7666	4.8323	3.654
hsa-miR-497-5p	4.64563	6.33034	4.63077e-11	-1.68471	3.21476	DOWN		6.4302	6.7253	6.2487	6.7282	5.5238	6.651	6.7036	6.5391	6.3656	6.2405	6.0445	5.9283	6.3533	6.1427	4.5715	4.4061	4.8321	4.61	4.5835	3.8271	4.7557	5.1893	4.8205	4.4729	4.2473	5.4316
hsa-miR-499a-5p	2.40155	4.45893	0.000387599	-2.05738	4.16229	DOWN		4.636	4.743	4.4768	3.3042	4.8785	4.762	4.2495	4.2437	4.5532	4.8361	4.7226	3.8908	5.0902	4.0384	3.6785	0	3.8321	0	4.372	0	3.0776	0	3.351	3.6061	3.2473	3.654
hsa-miR-499b-3p	0.843925	2.74529	0.00473199	-1.90137	3.73567	DOWN		2.9883	3.2923	3.2083	0	2.915	3.914	3.413	3.5916	3.2832	4.4491	4.4145	2.9648	0	0	3.5715	0	0	0	3.709	0	0	0	0	0	0	2.8466
hsa-miR-5007-5p	4.67972	2.68367	0.00108196	1.99605	3.98905	UP		3.9883	3.3855	2.9188	3.7192	2.9854	4.5921	3.6931	4.4281	3.8961	0	0	3.9648	0	0	5.0806	5.1013	4.417	4.266	5.1685	4.8778	4.148	5.1893	4.5086	4.5631	4.7168	4.1196
hsa-miR-500a-3p	5.14027	5.72891	0.00346464	-0.58864	1.50383	DOWN		5.3852	6.0002	6.0887	4.9823	6.2584	5.8898	5.9806	5.934	5.5707	6.3032	5.4816	5.5009	5.8272	5.0019	5.363	4.1013	5.7796	5.1505	4.5835	5.1897	5.3995	4.7039	4.8985	5.5187	5.8507	5.1443
hsa-miR-5010-5p	5.14719	4.31699	0.00019456	0.830206	1.77794	UP		3.4034	4.0859	4.3927	4.2047	3.915	3.8145	4.5125	4.0322	4.325	4.9186	4.4816	4.1665	4.8838	5.3014	4.4561	5.0582	5.6686	4.775	5.2115	5.3052	5.733	4.797	5.6048	5.541	4.3542	5.2617
hsa-miR-502-3p	4.10714	5.75645	0.00485163	-1.64931	3.13683	DOWN		5.4908	5.9246	6.1239	5.3746	5.6591	5.9613	6.1134	6.0131	5.7807	6.1062	5.6369	5.6202	5.6428	5.1427	4.4561	0	5.5483	4.2094	5.1241	4.7202	5.8218	0	4.7381	5.0422	5.0063	4.6192
hsa-miR-503-5p	7.31781	6.37282	0.00227206	0.944987	1.92517	UP		6.3482	6.2803	6.5562	6.012	7.1008	6.499	6.844	6.399	6.5707	6.034	5.3797	6.1665	6.3126	6.7165	6.6785	7.5216	8.48	5.4963	7.1575	7.3236	8.0731	7.0064	7.9635	7.8179	5.9044	8.3909
hsa-miR-505-3p	5.22232	5.9133	0.00303127	-0.690983	1.61438	DOWN		5.7396	5.7778	6.1918	5.5058	7.1244	5.914	5.5598	5.715	5.2618	6.8147	4.9764	5.8327	6.798	5.5744	5.2974	5.7142	5.8061	5.3985	4.6476	5.1897	5.0411	4.9669	5.0429	4.4729	5.4538	5.6367
hsa-miR-5087	0	1.54575	0.002938	-1.54575	2.91956	DOWN		2.8888	2.8449	0	0	2.915	0	0	3.3692	3.1026	0	3.4816	0	0	3.0384	0	0	0	0	0	0	0	0	0	0	0	0
hsa-miR-510-3p	8.98571	7.12179	9.64017e-05	1.86392	3.63996	UP		7.1952	5.4515	7.2919	6.2677	8.9048	8.1156	7.3267	8.2189	5.5355	7.771	6.7087	6.4373	7.798	6.6822	8.6492	9.096	7.8256	8.8625	10.068	9.5056	9.5854	8.0258	9.6193	10.226	9.6116	6.7535
hsa-miR-512-5p	2.5803	0.601114	0.0041884	1.97919	3.94271	UP		0	2.7074	0	0	0	0	3.1906	0	2.5176	0	0	0	0	0	4.7291	3.4732	0	3.8135	3.446	3.9267	4.2151	4.2564	0	3.1036	0	0
hsa-miR-518a-3p	0.289933	1.95234	0.00906681	-1.6624	3.16543	DOWN		2.8888	0	0	4.0978	0	0	2.9275	3.4847	0	4.2081	3.7226	2.9648	0	3.0384	0	0	0	0	0	3.4792	0	0	0	0	0	0
hsa-miR-518b	6.00721	5.22517	0.00540722	0.782037	1.71956	UP		4.9641	5.0579	3.3927	5.2302	4.0193	5.6218	5.5363	5.3388	4.7193	6.0706	5.8035	5.8908	6.0902	5.4169	6.4561	6.553	6.2535	5.8694	6.2738	6.1073	5.6383	6.5783	5.8794	5.1911	6.0704	5.2159
hsa-miR-532-3p	6.99625	7.57117	0.000821347	-0.574921	1.4896	DOWN		7.7432	7.4782	7.9777	7.4307	7.4228	7.4909	7.8344	7.5122	7.2401	7.9085	7.2606	7.4243	7.8698	7.403	6.6525	6.2617	7.9847	7.3985	6.8655	6.6636	7.2948	6.5249	6.9635	6.9533	6.7466	7.6454
hsa-miR-541-5p	2.33594	0.484979	0.00278109	1.85096	3.60741	UP		2.4034	0	2.2083	0	2.178	0	0	0	0	0	0	0	0	0	3.6785	0	3.3466	4.1505	4.709	3.3417	3.0776	0	0	0	3.0063	2.7211
hsa-miR-548ae-5p	1.16875	3.08842	0.00427744	-1.91967	3.78337	DOWN		2.8888	3.0859	3.9968	4.3973	3.7223	3.7076	3.413	3.3692	3.7193	4.0706	0	3.4502	0	3.4169	3.193	0	0	0	0	4.0198	0	0	3.458	0	3.3542	0
hsa-miR-548au-5p/548c-5p/548o-5p/548am-5p	4.76133	5.68814	5.78234e-05	-0.926811	1.90107	DOWN		5.5077	5.8284	5.8782	5.2553	6.2224	5.2925	4.4636	5.0322	6.2181	6.2081	6.2316	5.6653	6.1833	5.6472	4.9155	4.0138	5.1122	4.7355	4.6476	4.6636	5.2151	4.6043	5.0429	4.1625	4.5913	5.4316
hsa-miR-548ay-3p	4.54378	2.37625	0.00020706	2.16753	4.49252	UP		2.7819	2.9704	2.0708	2.9823	3.9506	4.177	3.7755	3.5916	3.4436	0	0	0	0	3.5238	4.778	5.6862	4.5483	4.653	4.6476	5.2677	4.2792	4.1189	3.8205	4.4256	4.1318	4.1685
hsa-miR-554	2.0205	4.32068	0.000157745	-2.30018	4.92519	DOWN		4.4737	4.1928	4.1412	4.0412	3.1166	4.8651	3.9275	4.5916	3.8395	4.9966	4.8295	4.5971	5.3533	3.5238	3.8711	3.3357	0	2.8875	0	0	3.0776	4.1189	0	3.6061	0	3.3491
hsa-miR-5585-5p	0	2.21666	0.000339382	-2.21666	4.64815	DOWN		2.9883	0	0	0	2.2935	3.4665	3.306	3.1062	3.3656	4.9966	4.5457	2.9648	0	0	0	0	0	0	0	0	0	0	0	0	0	0
hsa-miR-5589-5p	3.92111	0.847921	6.97808e-06	3.07319	8.4163	UP		3.3293	0	0	0	0	0	0	0	0	0	3.3441	5.1975	0	0	3.8711	4.1013	3.3466	3.7355	4.8245	5.3417	3.6626	4.4974	3.2356	2.8406	4.2473	3.3491
hsa-miR-5694	1.54965	4.06818	0.00608402	-2.51853	5.72997	DOWN		6.1258	5.0579	4.0708	5.8403	0	4.8145	5.4882	4.5916	4.8961	0	5.5457	5.3153	0	5.2083	4.8253	0	0	3.1505	3.8245	3.3417	0	0	0	0	3.4538	0
hsa-miR-5701	4.33038	1.74421	0.0011506	2.58617	6.00501	UP		3.4034	3.9704	2.3339	0	3.178	0	3.5125	0	3.7193	0	0	0	0	4.3014	3.4561	6.1837	3.4842	5.3469	5.2534	4.9267	0	5.655	5.5086	4.0422	5.0387	3.069
hsa-miR-5704	1.38266	0	0.00576314	1.38266	2.60748	UP		0	0	0	0	0	0	0	0	0	0	0	0	0	0	0	3.3357	0	3.3729	0	3.6048	0	0	3.11	0	0	3.1685
hsa-miR-5706	1.27532	3.90672	7.5807e-05	-2.6314	6.19629	DOWN		4.3293	4.0859	2.9188	3.3973	3.0525	4.177	3.9979	3.7842	3.1957	5.141	4.1096	2.9648	5.5757	3.9644	3.4561	0	0	0	3.709	4.0198	0	4.1189	0	0	0	0
hsa-miR-574-5p	7.11042	6.19878	0.000306739	0.911646	1.88119	UP		6.3102	6.7164	6.0798	6.8811	5.915	6.4334	5.7954	6.3842	6.1264	5.793	6.1719	6.3433	5.7069	6.1259	8.0609	8.5799	7.8765	6.4236	6.957	6.6048	7.1132	6.1545	6.695	6.6785	7.2542	6.927
hsa-miR-576-3p	4.42376	5.29896	0.000699902	-0.875199	1.83426	DOWN		5.0356	4.5949	5.2246	4.5672	5.2655	4.914	5.7954	5.2761	5.6051	6.3032	5.2701	5.0352	6.0902	5.2083	3.5715	3.3357	4.8321	4.6949	4.9314	5.0198	3.563	4.1189	4.2945	4.5187	5.1616	5.043
hsa-miR-579-5p	4.23289	1.7956	0.000345367	2.43729	5.41624	UP		3.0814	0	2.0708	0	0	0	3.7755	0	2.8961	4.3336	0	3.8908	5.0902	0	4.2634	3.5988	4.2726	4.653	4.031	4.1897	3.7557	4.9669	4.0429	4.5187	4.7168	3.7852
hsa-miR-584-5p	9.99173	9.47844	0.00857094	0.513282	1.42729	UP		9.9159	9.5864	9.3534	9.6641	8.9746	9.2141	8.4636	9.3156	10.327	9.141	9.8801	10.134	9.0162	9.7122	10.309	10.424	10.656	9.5768	9.5164	9.5915	9.6864	10.057	9.7086	10.384	10.135	9.856
hsa-miR-589-5p	5.79362	6.30666	0.00236206	-0.513048	1.42706	DOWN		6.2513	6.1668	6.7262	5.6068	6.6858	6.499	6.278	6.5916	5.9372	6.5815	5.9048	5.9648	6.9907	6.1088	6.0209	5.5057	6.3466	5.7944	5.372	5.4792	6.4971	5.4974	5.351	5.8406	5.7367	6.0818
hsa-miR-590-3p	7.56058	8.33704	6.77512e-05	-0.776452	1.71291	DOWN		8.4716	8.8346	8.9263	8.3162	9.6497	7.8463	8.0813	7.8611	7.9869	7.9966	8.212	8.1975	8.1141	8.2243	7.5853	7.2806	7.1946	7.5429	7.5419	7.8207	7.5822	8.0258	7.1663	7.648	7.9478	7.3909
hsa-miR-590-5p	2.6595	4.47966	0.00471221	-1.82016	3.5312	DOWN		4.3668	4.4298	4.6558	2.9823	5.8692	3.8145	3.8535	4.0322	4.4811	5.141	4.1096	5.6202	5.1833	4.1759	4.2634	0	4.417	3.1505	0	3.8271	4.148	5.1189	3.5575	0	0	3.4316
hsa-miR-604	5.20156	2.23727	1.0394e-05	2.96429	7.8044	UP		3.2513	3.0859	0	3.7896	1.915	3.5921	4.1292	3.8717	0	0	4.2701	0	0	3.4169	5.4257	5.5684	5.1946	5.3985	5.1685	5.5116	4.5106	5.7039	5.0769	4.9449	5.1616	4.7535
hsa-miR-6068	1.43433	4.18071	1.2048e-05	-2.74638	6.71032	DOWN		3.8888	3.7074	3.3339	3.9209	3.6374	4.5921	4.2495	3.9542	3.7193	4.9186	5.0666	4.5971	4.6428	4.3014	0	3.7142	0	2.8875	3.8245	0	0	0	0	0	3.1318	3.654
hsa-miR-6078	4.45832	2.92906	0.00594152	1.52926	2.88638	UP		3.4034	3.5554	2.7489	0	2.763	4.329	4.413	4.3692	2.7807	0	3.8295	4.3978	0	4.4169	4.041	4.2617	4.7796	4.4236	4.709	4.6048	5.4836	4.3819	4.351	4.3766	4.3018	3.7852
hsa-miR-6129	6.02385	2.04488	1.41192e-08	3.97897	15.7685	UP		3.3293	3.1928	2.9968	2.9823	3.3479	0	2.9275	3.1062	3.1026	0	0	3.6429	0	0	5.626	6.2992	5.7796	6.4844	5.5164	5.9505	6.0225	6.5783	5.458	5.911	5.8137	6.8466
hsa-miR-6130	7.77341	4.19265	2.31321e-16	3.58076	11.9651	UP		4.0356	4.3855	3.7489	4.5672	3.178	4.3994	3.7755	3.6911	4.3656	4.2081	5.3076	4.6429	4.5053	3.8864	7.6193	8.1118	7.2631	8.2556	7.4095	7.9327	7.3406	8.0162	7.3017	7.8224	7.9605	8.2475
hsa-miR-6133	4.60882	2.67121	0.000328622	1.9376	3.83069	UP		3.7819	2.8449	2.2083	0	2.841	3.914	4.1292	3.7842	2.7807	0	4.3441	2.9648	0	3.8039	4.3947	4.8718	4.5483	4.5198	5.0783	4.2677	4.7557	5.1893	4.2945	4.1625	4.8323	4.3909
hsa-miR-6134	6.20573	5.5153	0.000295668	0.690425	1.61376	UP		5.5572	5.7948	5.6558	5.7896	4.9329	5.5307	5.5363	5.6171	6.003	4.9186	5.9764	5.5736	4.8838	5.4444	5.2634	6.2992	5.8061	6.9406	6.294	5.7747	6.0411	6.2888	6.5086	6.6167	5.9392	6.6963
hsa-miR-617	2.14467	0.236143	0.00326779	1.90853	3.75427	UP		0	0	0	0	0	0	3.306	0	0	0	0	0	0	0	4.041	4.4061	0	0	0	0	0	4.797	2.9725	3.2191	3.4538	2.8466
hsa-miR-619-3p	4.13019	1.51429	9.99622e-05	2.6159	6.13005	UP		3.8888	0	0	2.8567	2.2935	3.8145	0	3.6911	0	4.6555	0	0	0	0	4.3305	4.1837	4.5483	4.3729	4.5835	4.3417	4.2792	4.7039	3.6506	3.9781	3.0063	3.5836
hsa-miR-624-5p	2.83359	4.74629	0.00396625	-1.91269	3.76512	DOWN		4.8093	4.8117	5.7823	4.6452	5.0849	4.8145	4.8535	4.2437	4.5176	5.2081	3.4816	4.7722	5.7069	3.7165	3.778	0	3.9316	3.653	0	0	4.885	4.4974	4.5575	3.6061	0	5.0945
hsa-miR-628-3p	8.29253	7.70764	0.000603812	0.584898	1.49993	UP		7.8823	7.7991	7.4389	7.9519	8.4291	7.84	6.9806	7.8011	8.0127	7.158	8.177	7.5071	6.9647	7.9644	7.9372	8.4567	7.9376	7.8739	8.3767	8.7375	8.1523	8.6235	8.1425	8.3292	8.3986	8.5447
hsa-miR-629-3p	7.76387	6.64436	6.18926e-05	1.11951	2.17273	UP		6.3668	6.3855	5.7376	6.4307	6.0688	6.762	6.306	6.934	6.5444	8.0885	6.592	6.3294	7.9907	6.4846	8.056	7.2992	8.8191	7.7204	7.8856	8.239	7.5695	7.1893	7.3371	7.184	7.7168	8.1504
hsa-miR-629-5p	10.0553	9.27846	0.00125041	0.776836	1.71337	UP		8.9778	9.013	9.0538	8.8485	9.4803	9.5365	8.8747	9.5274	9.3454	10.254	8.8035	8.7009	10.313	9.1697	10.026	9.5077	11.496	9.7317	10.159	10.105	10.217	9.2274	9.8842	9.8991	9.7745	10.636
hsa-miR-640	3.12173	0.179829	6.42698e-07	2.9419	7.68425	UP		0	0	0	0	0	0	0	0	2.5176	0	0	0	0	0	3.8711	3.5988	0	3.8135	3.5835	4.1897	0	4.2564	3.6506	3.5187	3.5469	3.4316
hsa-miR-642b-3p	0.260983	1.96524	0.00757405	-1.70426	3.25862	DOWN		0	2.7074	2.2083	3.3042	3.5931	4.177	0	4.2437	0	0	3.8295	3.4502	0	0	0	0	0	0	0	0	0	0	0	0	3.1318	0
hsa-miR-6501-5p	0.895383	3.23419	0.000851919	-2.3388	5.05883	DOWN		4.9641	3.7074	2.6558	3.9823	2.841	3.7076	3.7755	3.8717	3.588	0	4.4816	4.2867	0	3.4169	0	0	0	0	0	0	0	0	3.2356	0	4.2473	3.2617
hsa-miR-6508-3p	1.81299	0	0.00184192	1.81299	3.5137	UP		0	0	0	0	0	0	0	0	0	0	0	0	0	0	0	3.7142	0	3.8135	0	4.7747	0	0	3.2356	0	2.8688	3.3491
hsa-miR-6515-5p	4.12393	1.95684	0.000943121	2.1671	4.49119	UP		0	0	2.2083	3.0978	0	0	3.306	0	2.7807	4.0706	4.0222	3.5498	0	4.3603	4.8711	4.8212	3.8321	5.3205	3.709	4.7747	3.563	5.1893	3.5575	2.8406	3.3542	3.654
hsa-miR-652-3p	5.48039	6.51958	3.34792e-05	-1.03919	2.05507	DOWN		5.636	6.525	7.4248	6.8892	7.0525	6.607	7.0975	6.6911	6.5176	5.9186	6.4145	6.4243	5.8838	6.1922	5.2974	4.7142	4.9316	5.7944	5.5164	5.3773	5.3406	5.0449	5.673	6.7571	5.3282	5.9896
hsa-miR-658	4.71699	2.82406	0.000935236	1.89293	3.71388	UP		3.8363	4.1928	2.0708	3.3042	3.451	4.329	3.413	3.9542	3.7193	0	0	3.5498	0	3.7165	5.0806	3.8212	4.3466	5.4725	5.2115	4.7202	5.8218	5.1893	4.11	3.8406	4.9731	4.0165
hsa-miR-660-5p	8.1159	8.98821	4.22794e-06	-0.872314	1.8306	DOWN		8.6109	9.4037	9.3451	8.9615	9.0235	9.0405	9.6541	8.8611	9.1026	9.0201	8.3753	8.926	9.0902	8.4204	7.9848	7.2899	8.8061	8.025	7.9758	7.788	8.4316	7.9159	8.03	8.1876	8.3861	8.57
hsa-miR-664a-5p	7.81591	7.09754	4.08024e-05	0.718365	1.64532	UP		6.6437	7.1928	6.5944	7.1721	7.3972	7.7418	6.2055	7.6669	7.54	7.0706	7.4484	6.4502	7.2494	6.9926	7.8541	8.1937	7.8702	7.7701	7.8655	8.0477	7.75	7.6796	7.7328	7.7901	7.6762	7.5609
hsa-miR-664b-5p	4.59479	2.97952	0.00361552	1.61527	3.06369	UP		3.8363	2.9704	3.1412	3.4848	3.5931	4.7076	4.1292	4.1062	3.3656	0	4.4145	0	0	3.9644	4.626	5.5684	4.417	4.8135	3.709	4.8271	4.6626	4.8844	4.351	4.5187	4.4538	4.306
hsa-miR-668-5p	2.3686	0.36735	0.00138606	2.00125	4.00347	UP		0	0	0	0	1.915	0	0	0	0	0	0	3.2279	0	0	0	0	3.4842	3.266	3.709	3.3417	3.2151	4.7039	0	0	3.3542	3.3491
hsa-miR-6727-3p	3.40494	0.616686	5.39049e-06	2.78826	6.90794	UP		2.9883	0	0	0	2.6805	0	0	0	0	0	0	2.9648	0	0	3.9586	3.5988	3.3466	3.266	4.446	4.7747	3.4561	4.3819	3.458	3.1036	0	3.069
hsa-miR-6728-5p	2.80339	0.567629	0.000691439	2.23576	4.71012	UP		2.5409	0	0	0	2.178	0	0	0	0	0	0	3.2279	0	0	3.5715	3.4732	0	4.9231	3.9314	0	3.2151	4.1189	3.8985	0	3.5469	2.9621
hsa-miR-6729-3p	6.33302	5.10455	2.22758e-06	1.22847	2.34318	UP		5.2107	5.0293	3.9583	5.7549	3.763	5.3994	5.1602	5.4567	5.1957	5.4491	5.0222	5.709	5.3533	5.0019	6.471	7.0799	6.5005	6.5543	6.1241	6.5276	6.0595	6.797	6.1898	5.8224	6.2334	5.6367
hsa-miR-6732-3p	4.33415	2.79927	0.00496811	1.53488	2.89764	UP		3.9394	3.4729	2.0708	4.2553	2.915	3.8145	4.065	3.4847	3.7193	0	4.1096	3.3433	0	0	4.8711	4.8718	4.0247	4.8135	5.1241	3.6048	3.563	4.2564	3.6506	3.7666	5.2473	4.2159
hsa-miR-6735-3p	0.546808	2.27471	0.00540478	-1.72791	3.31247	DOWN		0	3.3855	2.9188	2.8567	2.0525	0	3.9275	3.1062	3.003	0	3.4816	3.8128	0	3.3014	0	0	3.3466	0	0	0	3.2151	0	0	0	0	0
hsa-miR-6756-3p	6.74733	5.31264	9.86431e-08	1.43469	2.70324	UP		5.6206	5.5554	4.2083	5.7011	4.3744	5.2166	4.8535	5.4847	5.9771	5.2081	6.251	5.709	4.6428	5.5744	7.0708	7.1118	6.8702	6.9665	6.8923	6.8902	6.148	6.9669	6.5454	6.3131	6.5913	6.6015
hsa-miR-676-3p	1.5569	4.67581	1.09303e-05	-3.11891	8.68734	DOWN		5.1899	4.3855	3.3927	4.9823	3.1166	5.3647	4.7755	5.0322	3.7807	5.7028	4.8295	5.1023	5.5053	4.3014	3.6785	0	0	0	0	0	3.2151	4.2564	3.8985	0	3.6343	0
hsa-miR-6769b-3p	6.46609	4.40857	5.45354e-05	2.05752	4.1627	UP		4.8628	4.6334	4.4493	5.1787	3.8785	5.329	5.278	5.2105	4.622	4.3336	4.4816	5.2867	0	4.1759	7.289	7.0025	6.5639	6.5081	6.7823	6.5896	5.885	6.8414	6.2505	6.4845	6.3798	5.0165
hsa-miR-6773-5p	0	1.78346	0.0011545	-1.78346	3.44252	DOWN		2.4034	0	2.3339	4.0978	2.763	0	0	0	2.8961	0	3.8295	3.2279	0	3.4169	0	0	0	0	0	0	0	0	0	0	0	0
hsa-miR-6774-5p	0.240625	1.98801	0.00224627	-1.74738	3.35749	DOWN		0	3.1928	0	2.7192	1.915	3.5921	3.065	3.4847	0	0	3.3441	3.1023	0	3.4169	0	0	0	2.8875	0	0	0	0	0	0	0	0
hsa-miR-6781-3p	3.06765	0.688664	0.00139368	2.37899	5.20171	UP		0	0	0	0	2.4999	0	0	3.1062	0	0	0	4.0352	0	0	3.778	4.3357	3.8321	4.3205	3.446	0	0	5.655	3.8205	3.2191	4.4049	0
hsa-miR-6781-5p	3.79251	5.25732	0.000423387	-1.46481	2.76028	DOWN		5.1475	5.2923	4.2407	5.4634	4.6154	5.329	5.2495	5.2105	4.7193	5.6555	5.8551	5.7926	5.2708	5.7609	4.778	4.4732	4.5483	3.7355	0	4.0198	4.0036	4.3819	4.0429	3.5187	3.9392	4.069
hsa-miR-6783-5p	2.80484	0.649221	0.00173173	2.15562	4.4556	UP		2.6664	0	0	0	2.2935	0	4.1292	0	0	0	0	0	0	0	3.5715	0	3.9316	3.1505	4.446	3.6048	3.3406	4.8844	0	3.7666	0	2.9621
hsa-miR-6784-3p	3.22882	1.1589	0.0094872	2.06992	4.19862	UP		3.8363	3.1928	0	2.9823	2.178	0	0	0	0	0	0	4.0352	0	0	4.3947	6.1013	0	4.2094	3.5835	4.2677	0	4.6043	2.9725	3.9781	4.6343	0
hsa-miR-6785-3p	4.99702	3.26445	0.00115472	1.73257	3.3232	UP		4.0356	3.6334	2.6558	3.4848	2.763	4.5921	3.306	4.3692	4.1026	0	4.4816	4.1023	0	4.1759	5.2974	5.5057	4.1122	5.3205	5.6787	5.3052	4.3995	6.0064	3.8985	5.2191	4.4049	4.8162
hsa-miR-6785-5p	4.21829	2.54436	0.00121903	1.67393	3.19082	UP		3.4737	3.0859	2.8364	2.9823	2.763	3.7076	0	3.2437	3.1957	0	3.4816	3.5498	0	3.3014	3.5715	4.8212	5.0247	4.1505	4.5164	5.3773	4.3995	5.1189	3.8205	3.1036	3.1318	3.5836
hsa-miR-6792-5p	3.93204	1.50898	3.79518e-05	2.42306	5.36308	UP		3.4737	2.9704	2.2083	0	2.4004	0	0	3.1062	0	0	0	3.5498	0	3.4169	3.778	3.9207	3.6097	4.1505	4.446	3.9267	3.4561	4.6043	3.11	4.2191	4.4538	3.5096
hsa-miR-6793-5p	3.74852	1.83341	0.00763432	1.91512	3.77145	UP		3.605	2.7074	0	0	3.2935	0	3.7755	0	3.5176	0	0	3.9648	0	4.8039	3.193	4.6577	4.0247	3.8135	3.8245	4.6048	4.6137	0	3.5575	4.2191	4.3542	4.1196
hsa-miR-6794-3p	4.51477	2.93551	0.00524926	1.57926	2.98817	UP		3.5409	3.4729	2.5562	0	2.5931	4.914	3.9979	4.4847	3.588	0	4.4816	4.1665	0	3.3014	4.8253	4.7687	4.4842	4.7355	4.1241	4.3417	3.3406	4.7039	4.1742	4.8762	4.8688	4.9341
hsa-miR-6800-3p	2.4921	4.38708	0.00754382	-1.89498	3.71916	DOWN		5.1689	4.7778	4.3035	4.7192	3.9506	4.8145	5.1292	4.4281	4.3656	4.0706	5.5768	5.6429	0	4.4714	3.5715	0	0	3.9579	0	3.9267	3.7557	5.2564	0	3.6061	3.2473	2.5836
hsa-miR-6800-5p	4.65352	2.82416	0.00510583	1.82936	3.55379	UP		3.8363	4.0859	0	3.3973	2.6805	4.0071	6.1906	3.5916	3.4436	0	4.2701	4.0352	0	0	4.8253	4.968	4.5483	3.9579	4.6476	5.2292	3.7557	5.4408	4.458	4.4256	4.8323	4.7535
hsa-miR-6801-3p	1.53327	4.68514	5.09304e-06	-3.15187	8.88806	DOWN		4.636	4.5949	4.3636	5.3515	3.2369	4.8651	5.2495	4.6422	4.8961	4.4491	5.4145	4.5009	4.5053	4.8864	0	3.5988	0	0	3.8245	0	0	4.797	3.11	0	0	3.069
hsa-miR-6802-5p	5.07675	3.65819	0.00749478	1.41856	2.67319	UP		4.5077	4.5147	3.2083	4.0412	3.2369	4.329	4.7349	4.4281	4.4436	0	4.666	4.9283	0	4.1759	5.3947	5.3714	4.9789	4.9231	5.6787	5.2677	4.9256	5.797	4.2945	4.7666	4.9392	4.5836
hsa-miR-6803-5p	3.16895	1.10537	0.00300043	2.06358	4.18022	UP		0	2.7074	0	0	2.178	0	3.413	3.1062	0	4.0706	0	0	0	0	4.626	4.1013	0	3.266	4.2115	4.1073	0	4.2564	3.11	3.326	4.3018	2.7211
hsa-miR-6804-3p	0.794017	4.04561	3.80109e-06	-3.2516	9.5242	DOWN		4.5733	3.7778	4.3035	4.6452	4.1166	5.1364	3.7755	5.3078	3.5176	0	3.3441	5.5971	4.5053	4.0384	0	0	0	3.4725	0	0	3.0776	0	0	2.9781	0	0
hsa-miR-6804-5p	2.5539	0.747886	0.00610075	1.80601	3.49675	UP		0	0	0	0	0	3.329	0	3.5916	0	0	0	3.5498	0	0	3.3305	4.0138	3.6097	2.8875	3.446	3.8271	3.3406	0	2.9725	3.2191	0	0
hsa-miR-6815-3p	2.7111	0.387264	0.000206948	2.32384	5.00662	UP		0	0	0	0	2.178	0	0	3.2437	0	0	0	0	0	0	3.6785	3.3357	3.4842	4.3205	4.031	3.6048	3.8431	0	0	3.1036	3.1318	0
hsa-miR-6819-5p	2.90733	4.37856	0.00824666	-1.47123	2.77259	DOWN		4.8363	4.3855	3.5562	4.4417	3.2369	4.5307	4.065	4.4281	4.1026	4.4491	5.2316	4.5971	4.7683	4.6707	4.3305	4.0138	0	3.5656	0	4.0198	0	5.1893	2.9725	3.911	3.4538	3.4316
hsa-miR-6823-5p	2.95074	0.867071	0.00355046	2.08367	4.23884	UP		2.6664	0	0	0	2.4999	0	0	0	3.3656	0	3.6071	0	0	0	3.8711	3.5988	3.9316	3.5656	4.372	0	3.6626	5.1893	0	0	3.8688	3.3491
hsa-miR-6831-5p	3.29089	1.0891	0.000557972	2.20179	4.6005	UP		0	0	2.2083	0	2.0525	0	3.065	0	0	0	0	4.0352	0	3.8864	3.4561	4.1013	3.3466	4.2094	4.294	3.7202	3.4561	0	3.351	3.8406	2.8688	2.8466
hsa-miR-6837-3p	2.44844	0.64475	0.00724577	1.80369	3.49112	UP		0	0	0	0	2.6805	0	0	3.2437	0	0	0	3.1023	0	0	3.5715	3.8212	0	0	0	3.9267	0	4.3819	3.7381	3.326	3.5469	3.069
hsa-miR-6838-3p	0.259167	2.55513	0.000582109	-2.29596	4.91081	DOWN		3.4737	4.2923	2.2083	0	1.915	4.3994	3.6056	4.1062	3.6551	0	3.8295	4.2867	0	0	0	0	0	0	0	0	0	0	3.11	0	0	0
hsa-miR-6853-5p	3.61213	1.73341	0.00745591	1.87872	3.67748	UP		0	2.8449	0	3.0978	2.4004	0	0	0	3.588	4.6555	0	0	4.5053	3.1759	4.2634	3.7142	3.9316	4.5198	4.709	4.0198	4.2151	4.4974	3.11	3.5187	0	2.8466
hsa-miR-6857-3p	6.4698	5.88871	0.00208836	0.581093	1.49598	UP		5.8888	5.3855	5.4904	5.7372	5.4004	6.5463	5.7141	6.4425	4.9506	6.2405	6.4651	6.3294	6.0902	5.7609	6.7537	6.4232	6.6097	6.5081	6.6787	6.4955	6.8746	6.8844	6.5454	6.0265	6.1167	5.7211
hsa-miR-6861-5p	1.10708	3.29822	0.00175467	-2.19115	4.56668	DOWN		3.9394	3.8449	2.9188	4.2047	3.3479	4.914	3.065	4.5391	3.1957	0	3.8295	4.8523	0	3.5238	0	0	3.6097	2.8875	3.446	3.3417	0	0	0	0	0	0
hsa-miR-6871-3p	4.99393	2.55595	9.35573e-05	2.43798	5.41884	UP		3.5409	3.7074	2.6558	0	2.6805	3.329	3.9979	0	3.3656	0	4.8801	3.4502	0	4.1759	5.0004	4.7142	4.6097	5.4725	5.294	5.0198	4.8001	5.5519	5.2653	4.6061	5.1616	4.4316
hsa-miR-6881-3p	4.90023	4.10476	0.00559411	0.795469	1.73564	UP		3.7819	4.0293	3.3927	3.9209	3.2369	4.255	3.9275	4.5391	3.7807	5.0706	4.4816	4.3433	4.9907	3.7165	5.3947	4.968	4.2726	4.4725	4.5164	5.3052	4.4561	6.0064	4.458	3.8406	4.5469	6.5654
hsa-miR-6894-5p	3.35888	1.28721	0.00235727	2.07167	4.20373	UP		0	3.1928	0	0	2.9854	4.255	0	4.1062	0	0	3.4816	0	0	0	4.515	3.3357	3.4842	4.5198	3.8245	3.6048	3.4561	0	2.9725	3.5187	3.3542	3.7211
hsa-miR-708-5p	3.17317	5.39924	0.000423147	-2.22607	4.67857	DOWN		5.4213	5.4729	4.6796	5.9823	5.1008	5.7076	5.1602	5.8066	4.4436	5.0706	5.9994	5.8717	5.0902	5.7826	4.626	4.0138	0	4.025	3.5835	4.6636	0	4.9669	0	3.6061	4.9392	3.654
hsa-miR-7112-3p	0	1.68116	0.000960004	-1.68116	3.20685	DOWN		0	2.7074	2.6558	2.7192	2.2935	0	3.1906	0	3.003	0	0	3.3433	0	3.6234	0	0	0	0	0	0	0	0	0	0	0	0
hsa-miR-7114-5p	2.44062	0.392936	0.00142083	2.04769	4.13443	UP		2.7819	0	0	2.7192	0	0	0	0	0	0	0	0	0	0	3.778	0	4.1122	3.4725	4.1241	4.0198	3.563	0	0	0	2.8688	3.3491
hsa-miR-7150	4.33027	1.05564	1.76719e-07	3.27463	9.67749	UP		3.1689	2.8449	2.0708	0	0	3.4665	0	0	0	0	0	3.2279	0	0	4.9586	4.7687	4.417	4.3729	4.8245	4.7747	4.148	4.6043	3.7381	3.7666	4.0063	3.5836
hsa-miR-760	5.46545	3.86364	0.00442676	1.60181	3.03525	UP		4.9143	4.5554	3.8782	4.2553	3.9506	4.8651	3.9979	4.9135	4.588	0	4.4145	5.2867	0	4.4714	6.3468	6.3176	5.0691	5.2935	4.879	5.2677	5.2151	5.4408	4.8985	5.1625	6.3671	5.3277
hsa-miR-761	0.264042	2.44925	0.0020072	-2.18521	4.54792	DOWN		0	0	0	0	2.178	3.4665	0	3.1062	4.4051	4.556	4.2701	3.2279	4.5053	4.5744	0	0	0	0	0	0	0	0	0	0	0	3.1685
hsa-miR-769-5p	5.26088	6.08769	0.00279486	-0.826802	1.77375	DOWN		5.9269	6.1134	6.3263	5.9823	8.3295	6.2359	5.6931	6.3541	5.003	6.2081	5.6946	6.1821	5.7069	5.4714	5.1565	4.3357	5.154	5.6949	5.7965	5.5116	4.9256	5.6043	4.6048	5.326	5.7367	5.284
hsa-miR-7847-3p	5.87582	4.68599	1.5582e-05	1.18983	2.28126	UP		4.0356	3.909	3.7933	4.5266	4.451	4.7076	4.5125	5.5391	4.6875	4.9186	5.4484	5.1975	4.9907	4.8864	6.119	5.1013	6.7526	5.8875	6.2326	6.5434	6.4699	5.7039	5.8205	5.4494	5.6762	4.7535
hsa-miR-8071	2.94562	4.84766	0.00436674	-1.90205	3.73743	DOWN		6.0239	4.7074	3.6558	5.7724	2.4004	5.255	6.7036	5.2437	4.588	5.0706	4.5457	4.2867	4.5053	5.1088	6.2805	4.1837	0	3.025	3.8245	3.9267	4.0036	0	3.7381	3.5187	0	2.8466
hsa-miR-8073	1.53334	0	0.0068966	1.53334	2.89456	UP		0	0	0	0	0	0	0	0	0	0	0	0	0	0	4.119	3.5988	0	0	0	0	0	4.7039	0	0	3.1318	2.8466
hsa-miR-8078	4.90296	3.44996	0.00412769	1.453	2.73777	UP		3.8888	3.7074	0	3.3042	3.178	4.914	4.1292	4.9937	3.5176	4.3336	3.9291	4.2279	0	4.1759	5.0806	5.0582	4.417	4.653	5.1241	5.3417	4.885	5.4974	4.5575	4.5631	5.0387	4.6192
hsa-miR-888-5p	5.24198	4.23599	0.000335211	1.00599	2.00832	UP		4.7538	3.7778	3.7489	3.5672	4.3744	5.0071	4.1906	4.9937	3.003	4.9186	4.9291	3.7304	4.5053	3.8039	5.515	4.5988	5.1122	5.6317	5.709	5.5116	4.885	6.4117	4.6048	5.2466	5.3282	4.3491
hsa-miR-92b-3p	9.70348	8.75554	2.74672e-08	0.94794	1.92912	UP		8.7819	8.7231	9.1762	8.4252	8.1166	8.5996	9.2203	8.6012	8.9185	8.8308	8.8231	8.845	8.699	8.8171	9.4083	9.3447	10.172	9.6263	9.6338	9.6491	10.18	9.3668	9.7721	10.157	9.3494	9.7823
hsa-miR-92b-5p	5.98937	4.69166	3.49565e-05	1.29771	2.45838	UP		3.5409	4.5554	4.2083	3.8567	3.915	5.3647	5.278	5.1766	4.588	5.6555	4.1921	4.5009	6.0902	4.7609	5.3305	5.8212	6.3998	5.975	5.5835	5.6048	6.6137	6.1893	6.1584	6.7666	5.0387	6.3909
hsa-miR-93-3p	4.94394	6.40564	0.00414361	-1.46169	2.75432	DOWN		6.4302	6.3043	7.1667	5.5471	7.2151	6.7486	6.5829	6.7615	5.8961	6.5815	5.9291	6.4758	6.3928	5.6472	5.515	4.2617	4.8321	5.3205	5.4816	5.9267	5.5106	0	5.8794	6.2052	5.4049	4.9896
hsa-miR-937-3p	3.70877	1.39997	0.00087198	2.3088	4.95469	UP		2.7819	0	2.8364	0	3.0525	3.8145	0	0	2.7807	4.3336	0	0	0	0	3.8711	4.4732	4.3466	4.266	0	3.3417	3.7557	5.2564	3.6506	3.6061	3.3542	4.5836
hsa-miR-942-3p	6.51335	6.0907	0.000736702	0.42265	1.34039	UP		6.3482	5.7605	6.4836	5.7549	5.6591	6.0515	5.9979	5.9542	5.7956	6.6066	6.0666	5.7926	6.6096	6.3889	6.7291	6.5684	6.5793	6.3338	6.4095	6.6922	6.8537	6.3819	6.351	6.648	6.2748	6.3385
hsa-miR-96-5p	5.84036	8.27474	1.5312e-06	-2.43438	5.40534	DOWN		6.8562	8.0789	9.7671	8.0083	8.8645	8.7179	9.382	8.7001	8.4834	8.5431	7.4484	7.3776	8.6263	6.9926	5.6525	4.4732	6.154	4.3729	6.294	5.6922	6.5239	5.4974	5.5086	6.148	5.1616	8.606
hsa-miR-99a-5p	6.10993	7.23384	0.00143207	-1.12391	2.17937	DOWN		6.2712	7.4298	6.3111	7.65	6.5059	7.9613	7.4065	8.0274	6.7579	6.9775	7.6295	7.5438	7.1606	7.6413	5.4561	6.3714	4.1122	5.5198	7.6555	7.239	5.5886	5.2564	6.7902	6.6061	6.7757	5.9482

## Sheet: Suppl Tab 3
Supplementary Table 3. Two group comparison: differential serum miRNAs between patients with advanced HCC vs. early HCC (FC>1.31 UP or DOWN, p-value<0.01)
							SampleType	HCC_Early	HCC_Early	HCC_Early	HCC_Early	HCC_Early	HCC_Early	HCC_Early	HCC_Early	HCC_Early	HCC_Early	HCC_Early	HCC_Advanced	HCC_Advanced	HCC_Advanced	HCC_Advanced	HCC_Advanced	HCC_Advanced	HCC_Advanced	HCC_Advanced	HCC_Advanced	HCC_Advanced	HCC_Advanced	HCC_Advanced
							SampleName	Gra_S106	Gra-S75	Gra-S76	Gra-S101	Gra-S97	Gra-S105	Gra-S107	Gra-S102	Gra-S111	Gra-S108	Gra-S72	LG771	LG932	LG396	LG766	LG842	LG869	LG736	LG666	LG801	LG931	LG802	LG828
miRNA	Average log2 reads HCC_Advanced	Average log2 reads HCC_Early	p-value (t-test)	Difference	Fold change HCC_Advanced / Early
hsa-let-7b-3p	11.3405	10.7955	0.00253344	0.545027	1.45905	UP		9.9642	10.654	11.116	10.585	10.747	10.869	11.104	10.724	11.066	10.969	10.952	10.432	11.32	11.257	11.887	11.021	11.124	11.486	11.496	11.543	11.677	10.941	11.902
hsa-let-7b-5p	16.7479	15.9246	0.00415818	0.823281	1.76943	UP		17.237	16.102	15.99	15.234	15.729	15.848	16.202	15.662	15.654	15.995	15.518	15.587	16.875	16.877	16.981	16.538	16.268	17.774	15.993	17.409	17.593	15.963	17.117
hsa-let-7c-5p	11.9229	11.0062	0.000236772	0.916735	1.88784	UP		11.774	11.019	11.134	10.418	10.89	10.793	11.523	10.613	11.167	10.967	10.77	10.529	12	11.764	12.239	12.216	11.658	12.422	11.834	12.461	12.432	11.224	12.296
hsa-let-7d-3p	9.16225	8.68665	0.000844059	0.475605	1.3905	UP		9.0118	8.9752	8.6189	8.7828	8.5908	8.8371	8.674	8.782	8.0659	8.4303	8.7843	9.5095	9.1431	9.8951	9.2256	8.7425	8.9856	9.211	9.0162	8.9498	9.0885	8.823	9.3571
hsa-let-7d-5p	12.8372	12.2099	0.0054321	0.627341	1.54472	UP		12.91	12.324	12.07	12.051	12.287	12.063	12.114	12.139	12.004	12.064	12.283	11.811	12.53	13.222	13.097	12.477	12.163	13.549	12.41	13.608	13.488	12.287	13.405
hsa-let-7f-5p	15.9103	15.3423	0.00648047	0.568061	1.48253	UP		15.036	15.758	15.009	15.902	15.938	14.785	14.618	15.55	15.061	15.347	15.761	15.513	15.942	15.759	16.204	15.437	15.621	16.029	15.254	16.176	16.41	15.815	16.764
hsa-let-7g-3p	0.583692	3.15362	0.000551579	-2.56993	5.93779	DOWN		0	3.679	5.0746	3.0823	3.2474	4.0392	0	4.2246	3.959	3.3344	4.0493	0	0	0	0	0	3.9267	3.0776	0	0	0	0	0
hsa-miR-100-5p	5.50787	7.11213	0.000227234	-1.60426	3.0404	DOWN		5.5209	7.8907	6.8647	8.0407	7.6014	8.006	8.0846	6.273	7.3671	5.6849	6.8994	5.5715	6.2992	3.6097	5.266	5.852	6.4121	5.0411	5.7039	5.8794	5.7085	6.1318	4.6192
hsa-miR-101-5p	10.6725	9.88062	0.00791433	0.79184	1.73128	UP		11.098	9.5659	10.102	8.8493	9.6058	9.8134	10.496	9.4587	10.27	10.008	9.4197	10.126	9.7919	11.654	10.792	10.404	10.211	11.554	11.322	10.898	10.279	9.7206	11.317
hsa-miR-106b-3p	9.06823	9.8857	0.00160538	-0.817467	1.76231	DOWN		11.119	10.078	10.294	9.451	9.9956	9.3313	10.287	9.2966	9.6401	9.7905	9.4596	8.4372	8.4976	9.4718	8.8533	9.0489	9.0449	9.8191	8.4694	9.3836	10.048	8.5885	9.1565
hsa-miR-107	11.2834	11.6777	0.00965928	-0.394311	1.31431	DOWN		12.267	11.668	11.605	11.768	11.809	11.178	11.523	11.447	11.524	11.84	11.826	11.285	11.195	11.049	11.447	10.919	10.69	11.533	10.859	11.65	11.973	11.199	11.602
hsa-miR-1181	4.36918	5.53648	0.000143195	-1.16731	2.24592	DOWN		5.669	5.9134	6.5557	5.3508	4.3517	5.7892	4.6384	5.9746	5.6848	5.4719	5.5018	4.3305	4.5988	4.6097	5.025	4.709	4.2677	4.2792	5.4408	4.4055	3.326	4.0063	3.4316
hsa-miR-1185-2-3p	0	4.18064	2.89055e-19	-4.18064	18.1341	DOWN		3.8964	4.679	4.1901	4.8708	3.2474	4.3871	3.9014	3.9351	4.2585	4.0125	4.6087	0	0	0	0	0	0	0	0	0	0	0	0
hsa-miR-1199-3p	1.17411	3.33729	0.00783636	-2.16318	4.47902	DOWN		0	3.9134	4.7376	3.9448	2.5104	4.6672	0	4.3502	4.4285	3.7129	4.4452	0	4.0138	0	0	0	0	0	4.1189	3.11	0	0	2.8466
hsa-miR-1227-5p	5.13614	5.94603	0.00734104	-0.809886	1.75307	DOWN		6.1694	6.1765	6.899	6.0986	5.0129	6.4624	4.9014	6.3198	5.718	5.4719	6.1764	5.6525	5.8467	4.7796	5.5656	4.5164	5.5116	4.6137	6.5783	4.458	5.0105	4.7948	4.306
hsa-miR-1237-5p	6.27329	5.11801	6.56617e-05	1.15528	2.22728	UP		4.9553	4.3464	5.8819	4.9448	3.7834	5.3871	5.4039	5.3799	5.3029	5.6849	5.2276	6.8598	6.2992	6.1332	6.2798	6.9443	6.8778	6.2948	6.6299	6.0936	5.9781	5.6966	5.1924
hsa-miR-1255b-5p	6.80197	5.72428	0.00122773	1.07769	2.11066	UP		7.0393	6.3464	6.4896	4.6229	5.6803	5.5797	5.674	4.8527	5.468	5.6849	5.5293	6.193	6.4061	7.6321	7.0002	6.567	5.8011	7.8484	6.3819	7.673	7.4494	6.1907	6.4808
hsa-miR-125a-5p	11.1099	10.4047	0.00232585	0.705226	1.6304	UP		10.819	9.7936	9.534	10.54	10.998	10.144	10.493	10.586	10.404	10.374	10.766	10.698	11.532	10.983	11.294	12.204	11.772	11.249	11.032	10.592	10.721	10.874	10.368
hsa-miR-1262	2.73743	4.84203	0.00674471	-2.10459	4.30077	DOWN		4.1188	5.2919	6.512	5.1148	3.6259	4.7497	5.1238	6.032	5.6508	3.3344	3.7082	3.778	3.4732	0	4.9579	3.8245	4.2677	3.0776	0	0	0	5.0387	4.4316
hsa-miR-126-3p	16.4051	15.7684	0.00173324	0.63672	1.55479	UP		15.333	15.53	15.071	16.442	16.046	15.907	15.4	15.821	15.969	15.826	16.107	16.157	17.194	16.081	16.811	16.282	16.223	16.547	17.234	16.161	15.823	16.206	16.142
hsa-miR-126-5p	13.5594	12.6284	3.3424e-05	0.931053	1.90667	UP		12.663	12.449	11.701	12.965	12.775	12.812	12.321	12.443	12.928	12.783	13.072	13.534	14.153	13.294	13.85	13.556	13.308	13.693	14.556	13.268	12.839	13.306	13.356
hsa-miR-1270	5.70678	5.02504	0.00417886	0.681739	1.60407	UP		5.1188	4.7208	5.9159	5.0492	4.48	5.6672	4.7088	4.4656	5.2585	5.1824	4.7082	6.2461	5.968	6.6394	5.1803	4.879	5.7747	5.885	5.797	5.5086	6.2869	5.2473	5.069
hsa-miR-1271-5p	0	1.73271	0.00727952	-1.73271	3.32351	DOWN		0	0	3.8116	0	2.9254	4.4866	0	0	0	3.7129	4.1233	0	0	0	0	0	0	0	0	0	0	0	0
hsa-miR-127-3p	5.43178	6.95917	0.00118929	-1.5274	2.88265	DOWN		5.4407	6.5688	7.2311	7.1621	7.9942	7.1647	8.1238	8.3312	4.959	7.9666	5.6087	5.2287	4.4732	5.6097	5.0574	5.6787	5.7747	5.2792	6.2232	5.3785	3.8406	6.6343	6.0031
hsa-miR-128-3p	10.7857	10.2062	0.000113446	0.579458	1.49429	UP		10.597	10.055	9.7773	10.26	10.48	9.635	10.412	10.101	10.153	10.516	10.282	10.679	10.276	11.237	10.678	10.603	11.018	11.243	10.76	10.533	10.755	10.956	10.69
hsa-miR-1292-3p	4.12365	1.41582	0.000154858	2.70783	6.53339	UP		0	0	3.8116	0	0	0	0	4.2246	3.718	3.8198	0	4.4561	4.1837	3.8321	3.1505	4.372	4.9267	4.0776	4.1189	3.9725	3.911	4.9731	3.5096
hsa-miR-1292-5p	5.2648	5.87373	0.00160962	-0.608927	1.52512	DOWN		5.7377	5.5688	6.4669	6.7726	5.4012	5.5339	5.6384	6.1575	6.1893	5.536	5.6087	5.8018	5.5057	5.9555	4.9918	5.0783	5.3052	5.5106	5.1189	4.9725	5.0105	4.8323	5.0945
hsa-miR-1305	0.586292	2.65965	0.00532235	-2.07336	4.20867	DOWN		0	3.0509	4.8819	4.2668	2.7328	0	4.0169	3.2246	3.5805	0	3.5018	0	0	0	3.9579	0	0	3.0776	0	0	0	0	0
hsa-miR-1307-3p	8.59202	9.06358	0.00515946	-0.471565	1.38661	DOWN		8.4763	9.1033	8.7184	9.5742	9.3528	9.0796	8.9201	9.4482	8.6249	9.065	9.3366	9.1472	8.9356	8.8513	8.2764	7.9883	8.4207	8.0731	8.448	8.7565	8.7713	8.9794	8.4564
hsa-miR-1307-5p	5.26481	6.2277	6.41313e-07	-0.962892	1.94921	DOWN		6.3114	5.9491	5.8116	6.5418	6.3348	6.4866	6.3608	6.5334	5.7821	6.0999	6.2932	5.7291	5.0582	5.1946	5.5429	5.1241	5.1073	4.7099	5.9263	5.4055	4.6886	5.4295	5.2617
hsa-miR-130b-5p	3.6815	5.40641	0.00445004	-1.72491	3.30559	DOWN		5.3114	5.2919	5.8472	5.7314	5.5837	5.5797	5.4864	5.4931	4.959	4.7129	5.4738	4.9586	4.3357	3.9316	4.3729	5.031	4.6636	4.0776	0	0	4.6061	4.5469	3.654
hsa-miR-133a-3p	3.125	4.49795	0.00927594	-1.37295	2.59	DOWN		3.8964	4.3464	4.6596	5.1775	3.5693	4.4866	4.2233	4.5725	4.959	4.6563	4.9306	3.6785	3.3357	3.8321	3.8135	3.8245	4.8271	3.3406	0	3.7381	3.1036	4.0063	0
hsa-miR-141-5p	2.10404	5.95841	3.38632e-06	-3.85437	14.4637	DOWN		5.4813	6.437	7.0132	6.3644	5.8081	5.3346	4.3164	7.4726	6.0659	5.2979	5.9511	3.6785	0	3.4842	0	3.446	0	0	4.1189	3.5575	0	3.4538	3.5096
hsa-miR-144-5p	9.68956	10.9943	6.67065e-05	-1.30471	2.47035	DOWN		12.272	11.306	11.336	10.41	11.682	10.224	10.425	10.534	10.984	11.021	10.743	9.7885	8.7787	9.2195	9.5037	9.4392	9.1822	9.9941	9.9518	9.8143	10.517	9.0487	11.037
hsa-miR-145-5p	7.14627	8.13038	0.000767509	-0.984115	1.9781	DOWN		7.7123	8.5573	6.9815	7.4684	8.7456	7.8371	8.0307	8.265	8.2301	8.9253	8.6809	7.471	6.7417	5.7252	7.025	7.9821	7.9971	7.3556	7.3048	6.7591	7.2191	7.2404	6.9341
hsa-miR-151b/151a-5p	8.07677	8.67157	0.000157505	-0.594806	1.51027	DOWN		8.2539	8.6111	8.0365	9.2413	8.682	8.7547	8.8787	8.3236	8.718	9.0946	8.7929	7.9533	8.4104	7.8256	8.4725	7.7165	7.9856	8.1132	8.3744	7.9033	7.7475	8.1943	8.2246
hsa-miR-152-3p	9.14763	8.5266	0.000138961	0.621033	1.53798	UP		7.9625	8.6522	8.2644	8.8517	8.715	8.9062	8.6384	8.5433	8.201	8.4719	8.586	9.4729	9.4189	9.6321	8.9876	9.4118	9.0532	8.7863	9.4694	8.9793	8.5576	9.2917	8.7108
hsa-miR-152-5p	4.12917	5.44871	6.98459e-05	-1.31953	2.49586	DOWN		6.5012	6.3194	6.3965	5.6002	4.7328	5.3871	4.7088	5.6959	5.3878	4.5974	4.6087	5.0806	4.7142	3.8321	3.9579	4.7679	3.6048	3.563	4.1189	4.11	3.2191	4.1907	4.3909
hsa-miR-154-5p	0.250525	2.54467	0.00202386	-2.29415	4.90464	DOWN		0	3.679	0	3.7928	3.8323	4.8277	4.0169	4.7194	0	0	3.1233	0	0	0	0	0	0	0	0	0	0	3.0063	0
hsa-miR-155-5p	9.77993	9.08758	0.00388134	0.692351	1.61592	UP		8.4458	9.1052	8.6646	9.8115	9.6986	9.0676	8.7677	9.255	8.6848	9.2604	9.2022	9.8048	10.551	8.5522	10.104	9.8158	10.294	8.948	10.08	9.458	10.216	10.007	9.5284
hsa-miR-15a-5p	10.5565	11.8404	0.000241726	-1.28384	2.43486	DOWN		13.146	11.928	12.084	10.944	12.172	11.465	12.104	11.627	11.629	11.6	11.545	9.9466	9.4526	11.871	10.671	9.8723	9.8479	11.298	10.08	11.37	10.732	9.9919	11.545
hsa-miR-15b-5p	11.1135	12.1536	0.0021592	-1.04009	2.05635	DOWN		13.662	12.45	12.093	11.363	12.553	11.616	12.393	11.777	12.043	12.135	11.605	10.053	9.9796	11.961	11.442	10.67	10.474	11.725	10.756	11.948	11.482	10.618	12.254
hsa-miR-17-3p	4.44578	6.12078	0.00445417	-1.675	3.19319	DOWN		6.5968	6.2209	7.1901	5.8324	5.8912	5.2236	6.0444	6.257	6.5623	6.3162	5.1937	4.2634	0	5.1122	4.3205	4.294	5.3773	5.0776	4.7039	4.4055	5.3516	3.4538	6.9896
hsa-miR-181a-2-3p	6.43824	7.2635	3.74582e-05	-0.825258	1.77185	DOWN		7.2539	7.285	7.4669	7.7104	7.5657	6.9017	6.7258	7.1998	7.3353	6.8453	7.6087	6.4103	6.2992	6.3466	6.7847	6.852	7.031	6.1819	5.6043	6.2052	6.885	6.6966	5.9621
hsa-miR-181a-3p	5.6062	6.68671	6.05691e-05	-1.08051	2.11478	DOWN		5.7708	6.8676	7.0746	7.2739	7.065	6.8086	5.6019	7.6294	6.7663	6.2219	6.4738	6.119	5.5684	4.8321	5.7355	5.4816	5.974	5.537	5.7512	5.2945	5.3516	6.3018	5.3277
hsa-miR-181a-5p	9.72419	10.2629	0.00237424	-0.538663	1.45263	DOWN		9.8621	10.286	10.224	10.829	10.675	10.464	9.4839	10.616	9.7504	10.265	10.436	9.5204	9.898	9.1514	9.8943	9.7679	10.098	9.5139	9.6796	10.133	10.019	9.8598	9.155
hsa-miR-181b-3p	0.958942	3.45237	0.00294357	-2.49343	5.63116	DOWN		4.5593	3.9134	4.3965	3.2079	0	4.0392	0	4.5201	4.5805	4.0999	4.6593	0	0	0	0	0	0	3.4561	5.0449	0	0	3.0063	0
hsa-miR-182-5p	11.5597	10.2342	0.00298076	1.32543	2.50608	UP		11.709	9.8953	10.015	9.3728	10.772	9.7621	9.4864	10.38	10.124	10.924	10.136	10.271	10.548	10.975	11.215	11.484	11.272	12.181	11.437	11.118	12.754	10.982	14.479
hsa-miR-1827	6.37914	5.15089	6.85776e-05	1.22825	2.34283	UP		5.9553	5.2639	5.1335	4.1465	5.0752	5.2802	5.6019	4.9746	5.8131	4.4048	5.0108	4.8253	6.0362	6.4677	6.7153	6.2115	6.1491	6.9155	6.4408	7.228	6.7475	5.8507	6.9621
hsa-miR-188-3p	6.20941	3.08652	2.04126e-06	3.12289	8.71131	UP		0	2.9134	4.297	3.2079	3.449	4.2802	3.6384	4.1575	3.959	0	4.0493	6.9479	5.8212	6.2726	6.3338	6.5835	6.3596	5.3995	7.0449	5.8794	6.2191	6.086	5.5654
hsa-miR-190b	7.15879	6.47704	9.44412e-05	0.681755	1.60409	UP		6.6333	6.801	6.4896	6.4684	6.2201	7.0555	6.3388	6.5466	5.6508	6.6272	6.4161	6.4858	7.1635	7.2821	7.307	7.446	7.7613	7.2635	7.0638	6.8503	7.3388	7.0307	6.9127
hsa-miR-193a-3p	3.3272	0.748118	0.00112446	2.57908	5.97559	UP		0	0	4.1901	0	0	4.0392	0	0	0	0	0	4.4561	4.0138	0	3.9579	4.294	4.8778	3.4561	4.2564	0	3.6061	3.3542	3.654
hsa-miR-19a-3p	8.77667	10.3594	0.00018534	-1.58274	2.99539	DOWN		11.691	8.7639	9.747	8.8177	10.521	10.409	10.623	10.414	11.607	10.906	10.454	8.7568	7.6504	10.022	8.2798	8.4141	8.0141	9.7387	8.9819	8.7721	8.6659	8.3639	9.6604
hsa-miR-203a-3p	6.00413	7.14595	0.000207607	-1.14181	2.20658	DOWN		7.0118	8.0261	7.8384	6.2953	5.9141	7.3871	6.6563	7.1227	8.135	6.8704	7.3482	6.2805	6.5057	5.7252	6.2238	6.6159	5.5434	5.2792	6.7743	5.3785	6.389	5.613	5.7211
hsa-miR-205-5p	4.74329	6.1482	0.000111289	-1.40491	2.64801	DOWN		5.866	6.3989	5.1335	6.0658	6.3684	5.2236	6.1238	6.105	7.718	5.9432	6.684	5.193	4.0138	4.417	4.9918	5.5164	5.974	4.0036	4.2564	5.2052	5.1625	4.6762	3.5096
hsa-miR-215-3p	0	1.81291	0.00188078	-1.81291	3.5135	DOWN		0	3.1765	3.8116	0	2.5104	0	3.7759	3.0871	3.5805	0	0	0	0	0	0	0	0	0	0	0	0	0	0
hsa-miR-219a-1-3p	3.77952	5.38686	0.00182535	-1.60734	3.04689	DOWN		5.669	4.2354	6.512	4.4809	4.6803	5.6241	5.9312	5.0506	6.7663	5.1824	5.1233	4.7291	4.1013	4.417	4.3729	4.446	4.5434	3.9256	4.4974	0	3.6061	3.4538	3.2617
hsa-miR-221-3p	10.985	11.9642	8.62435e-07	-0.979182	1.97135	DOWN		11.64	11.934	11.732	12.363	11.925	12.331	11.672	12.03	12.148	11.903	11.928	11.689	11.492	10.85	10.904	10.635	11.173	10.388	10.321	10.998	10.908	11.183	11.279
hsa-miR-221-5p	3.4282	4.93537	0.0089361	-1.50717	2.84252	DOWN		4.835	4.6359	4.6596	5.0492	5.3517	5.1647	4.4864	4.9351	5.1654	4.9193	5.0868	4.6785	3.8212	3.3466	3.8875	0	5.3052	3.0776	0	4.0429	3.9781	4.8323	4.1685
hsa-miR-222-3p	7.84403	8.74737	6.29816e-07	-0.90334	1.87039	DOWN		8.6601	9.1557	8.5449	9.4026	8.6903	8.9721	8.84	8.7453	8.2529	8.2979	8.6593	8.233	8.2474	7.7594	8.025	7.372	8.0141	7.626	7.4694	7.7539	7.733	7.9647	7.9305
hsa-miR-22-3p	10.7288	11.5053	0.00525662	-0.776439	1.7129	DOWN		12.293	12.071	11.825	11.669	11.229	12.407	11.624	10.865	11.099	10.65	10.826	10.528	10.735	11.694	10.262	10.32	9.87	11.339	10.543	11.436	10.78	10.017	11.222
hsa-miR-22-5p	4.61806	6.07817	5.06209e-08	-1.46011	2.7513	DOWN		5.7377	6.4984	6.8472	6.1465	5.6803	6.2802	6.3608	5.5201	5.9024	5.8951	5.9912	4.5715	4.8212	5.154	4.2094	4.7679	4.6636	4.7099	5.3205	4.8205	3.6886	4.0704	4.6192
hsa-miR-23b-3p	10.0718	10.5595	0.00132226	-0.487779	1.40228	DOWN		10.08	10.861	10.516	10.55	10.386	10.452	10.777	10.589	10.676	10.539	10.729	10.435	10.566	9.8094	9.9929	10.298	10.405	9.652	9.8359	9.9646	9.6671	10.671	9.5643
hsa-miR-23c	5.04936	6.04669	0.00018562	-0.997333	1.99631	DOWN		4.9553	6.2062	6.1335	5.689	5.7068	6.1033	6.1991	6.2409	6.1893	6.37	6.7202	5.5435	4.8718	3.8321	5.025	5.4095	5.9024	4.7557	5.4408	4.6506	4.8406	5.7367	4.5836
hsa-miR-2681-3p	0.317792	3.8032	2.5205e-06	-3.48541	11.1999	DOWN		3.7708	4.9134	5.3965	4.6673	2.6259	3.9017	0	4.5725	5.0134	3.4719	3.5018	0	0	0	3.8135	0	0	0	0	0	0	0	0
hsa-miR-26a-2-3p	7.24557	8.90552	2.26239e-07	-1.65994	3.16004	DOWN		9.8132	8.5688	8.2644	8.9936	8.9283	8.3676	8.5013	8.897	9.0101	9.3434	9.273	6.9586	6.9563	5.8827	7.7944	7.243	7.4627	6.9941	8.3127	7.1505	7.4612	7.5803	7.1504
hsa-miR-28-3p	9.49824	8.61998	0.000202522	0.87826	1.83816	UP		7.3775	8.7589	8.0595	9.1928	8.9099	8.4986	8.521	9.0506	8.1412	9.1443	9.1655	9.8398	9.7935	8.8608	9.6662	9.5078	9.7613	8.9455	9.6487	9.3649	9.412	9.9338	9.2446
hsa-miR-28-5p	4.3659	5.19711	0.000354419	-0.831209	1.77918	DOWN		4.4813	5.1765	4.9491	5.9804	5.2108	5.0392	5.3608	5.0131	4.9024	5.4719	5.5827	4.3947	4.7687	3.6097	3.5656	4.2115	4.1897	3.9256	5.4408	4.695	4.6061	4.6343	4.3491
hsa-miR-298	3.67979	0.977655	0.000238163	2.70214	6.50765	UP		0	0	3.9491	0	0	0	0	3.2246	3.5805	0	0	4.5715	3.5988	4.2726	3.8875	3.9314	4.0198	3.4561	4.4974	0	3.2191	4.3542	4.3491
hsa-miR-29a-3p	10.5114	11.6852	1.56735e-06	-1.17377	2.256	DOWN		11.546	12.144	10.586	11.838	11.939	11.323	12.311	11.672	11.499	12.015	11.664	10.424	10.672	9.56	10.535	10.903	10.987	10.216	10.595	10.43	10.309	10.906	10.6
hsa-miR-29b-1-5p	5.65981	4.78185	0.00020367	0.877963	1.83778	UP		5.2656	4.1151	4.3965	4.5298	4.283	4.3871	5.3164	4.5201	5.5805	5.4048	4.8014	5.0004	5.3357	5.417	6.2094	5.6476	5.4121	5.537	6.3205	6.2356	5.3766	5.4776	5.9482
hsa-miR-29c-3p	10.6797	11.4934	0.00177624	-0.813647	1.75765	DOWN		12.648	11.392	10.874	10.805	11.889	10.95	11.791	11.395	11.203	11.804	11.676	10.304	9.9116	11.697	10.875	10.452	10.329	10.714	10.455	11.115	10.319	10.391	11.594
hsa-miR-302e	8.88473	7.80293	9.58269e-05	1.08181	2.11668	UP		7.4913	7.7463	9.0708	7.747	6.7709	8.0716	6.84	8.1703	7.9932	7.699	8.2318	9.3057	8.9504	9.0526	8.6949	9.1464	8.8747	8.6353	9.8332	8.714	8.3735	8.7829	8.2532
hsa-miR-30b-5p	6.91404	7.63421	0.000831343	-0.720167	1.64737	DOWN		7.8112	7.285	6.8647	7.9037	8.1446	7.2091	7.8787	7.5201	7.5805	8.2839	7.4948	6.4103	6.3176	6.1946	7.3138	6.5335	6.9505	7.363	7.3668	6.908	7.0185	6.9815	7.6104
hsa-miR-30c-5p	9.29798	9.86503	0.00381963	-0.567053	1.48149	DOWN		10.33	9.987	9.2512	9.7853	10.317	9.0595	10.302	9.7567	9.4006	10.259	10.067	9.1402	8.5097	9.1566	9.6504	9.1353	9.5512	9.9845	9.3439	9.3614	8.9131	9.5734	9.256
hsa-miR-30e-3p	8.78749	8.21588	0.00748319	0.57161	1.48618	UP		7.4713	8.1384	7.9243	8.5973	8.884	7.9548	7.9531	8.4305	7.9096	8.8262	8.2852	8.8569	8.5452	7.5946	9.1202	8.9217	9.5216	8.5662	8.78	8.625	9.0771	9.2782	8.5632
hsa-miR-3118	0.588825	4.43821	2.99347e-06	-3.84938	14.4139	DOWN		4.7708	4.6359	5.2445	5.7928	4.5979	3.9017	0	4.7652	5.468	4.7129	4.9306	0	0	0	0	0	0	0	0	0	0	3.6343	3.4316
hsa-miR-3120-3p	1.10262	3.37032	0.00406737	-2.2677	4.81555	DOWN		0	3.2919	3.9491	4.2668	3.8796	0	3.6384	4.4656	5.0134	4.1824	4.3863	3.778	0	0	0	0	0	0	0	2.9725	0	3.6343	2.8466
hsa-miR-3129-5p	2.15681	5.00958	0.000156946	-2.85277	7.22388	DOWN		5.0118	4.9491	5.8472	5.5771	3.9698	5.2802	3.9014	5.1227	4.7821	4.7129	5.9511	3.3305	0	3.9316	3.3729	0	3.8271	0	4.8844	0	3.1036	0	3.4316
hsa-miR-3152-5p	5.66599	4.14027	2.71893e-05	1.52572	2.8793	UP		4.6333	3.7614	5.4438	3.6229	2.7328	4.8277	4.84	3.0871	4.0659	4.4048	4.1233	5.9372	5.8212	5.5483	5.6949	5.5164	5.6636	5.6137	7.1893	5.458	5.2191	5.4538	4.8764
hsa-miR-3169	0.287167	4.04121	5.94245e-07	-3.75404	13.4921	DOWN		4.3989	4.8394	5.3965	4.5771	3.8796	5.9721	0	4.2246	3.8435	3.7129	3.6087	0	0	0	0	3.446	0	0	0	0	0	0	0
hsa-miR-3176	0.54915	2.54541	0.00425982	-1.99626	3.98964	DOWN		3.6333	3.0509	0	0	2.7328	0	4.1238	4.1575	3.5805	3.5974	3.1233	0	0	0	0	3.5835	0	0	0	0	0	3.0063	0
hsa-miR-3191-5p	1.22553	3.55882	0.00664231	-2.33328	5.03951	DOWN		0	4.801	5.297	4.6673	3.1734	5.1647	0	4.9351	4.1654	3.3344	3.6087	0	3.7142	0	3.3729	3.8245	0	0	0	0	0	3.7948	0
hsa-miR-320a	12.1892	12.912	0.00182221	-0.72275	1.65032	DOWN		13.119	12.893	13.813	13.145	12.709	13.38	12.605	12.858	12.705	12.222	12.583	12.303	12.629	12.838	11.709	11.962	11.648	12.271	11.104	12.42	12.266	12.152	12.969
hsa-miR-324-3p	4.86735	5.40007	0.00570925	-0.532723	1.44666	DOWN		6.5209	5.2919	4.6596	5.5055	5.283	5.6672	5.8083	5.2888	5.5065	4.8198	5.0493	4.626	4.1837	4.6097	4.6949	5.0783	5.0198	5.2792	4.8844	5.0769	5.2466	4.8323	4.8764
hsa-miR-326	5.64638	6.35299	0.00124737	-0.706608	1.63196	DOWN		5.3114	6.0509	6.3476	6.7828	6.7134	6.4624	5.7088	6.8527	6.1654	6.7673	6.7202	6.1379	5.5988	5.3823	5.4482	6.3139	5.9024	5.2792	6.2232	5.351	5.0733	5.6762	5.3702
hsa-miR-329-3p	1.62019	3.96509	0.0051293	-2.3449	5.08025	DOWN		0	4.0509	4.0746	3.0823	4.8562	4.7497	5.7427	4.8945	4.0659	4.7129	3.3863	3.6785	0	3.4842	0	0	4.0198	0	0	0	0	4.6762	3.5836
hsa-miR-331-3p	4.04919	4.61147	0.008497	-0.562281	1.4766	DOWN		3.7708	3.8394	4.5771	4.7104	4.6259	5.1647	4.7088	4.8945	4.4285	4.9193	5.0868	3.9586	4.0138	3.7252	4.4236	3.5835	4.5434	3.7557	4.9669	3.8985	4.0422	3.2473	4.4316
hsa-miR-337-5p	3.49272	5.84659	0.0026433	-2.35387	5.11192	DOWN		4.5593	5.1151	5.9815	5.9083	6.5979	5.4866	6.7427	6.955	5.1654	6.6418	5.1589	5.2634	4.1837	5.1122	3.9579	0	0	4.2151	4.9669	4.2945	0	4.5913	5.3277
hsa-miR-339-3p	6.41796	7.55481	2.48966e-07	-1.13685	2.199	DOWN		8.5306	7.3989	7.8733	7.5238	7.3517	7.2236	7.259	7.3502	7.8659	7.37	7.3559	6.2974	6.3537	6.6541	5.975	6.3139	6.1073	6.6864	6.0824	6.7274	6.6785	6.0704	7.069
hsa-miR-339-5p	6.67307	7.7943	9.54155e-06	-1.12122	2.17532	DOWN		7.4611	7.0913	7.899	8.2918	8.1325	7.1189	7.5549	7.8841	7.9239	8.2121	8.1677	7.119	6.2426	6.4341	6.7254	7.031	6.974	6.3103	6.1545	6.3921	6.911	7.7268	6.0561
hsa-miR-340-3p	3.27362	4.72737	0.00711676	-1.45376	2.7392	DOWN		4.835	4.9134	4.1901	4.8324	4.5979	5.2236	4.7759	4.5201	4.8435	4.1824	5.0868	3.5715	3.4732	3.3466	4.5198	0	4.2677	4.3406	0	4.1742	3.326	4.2473	4.0165
hsa-miR-340-5p	10.1047	9.38296	0.000389047	0.72172	1.64915	UP		9.0895	9.2062	8.5231	9.5403	9.6559	9.2836	9.2851	9.5033	9.4582	9.7024	9.965	10.449	9.8419	9.5045	10.096	10.174	10.462	9.8563	11.135	9.8527	9.9206	10.271	9.6932
hsa-miR-342-3p	12.5	11.4114	0.000195609	1.08864	2.12673	UP		11.081	11.296	10.3	12.212	12.343	10.573	11.816	11.705	11.403	11.46	11.336	12.474	12.53	11.332	13.132	12.902	13.1	12.368	12.745	12.515	12.525	12.763	11.614
hsa-miR-345-3p	0.89125	3.70603	0.000232126	-2.81478	7.03611	DOWN		4.1188	4.3464	5.1901	4.4303	2.3849	4.6672	0	4.1575	3.5805	3.9193	3.9713	3.5715	0	0	0	0	3.6048	0	0	0	3.5187	0	0
hsa-miR-345-5p	5.80105	6.69495	2.93508e-06	-0.893896	1.85819	DOWN		6.866	6.7104	6.6596	7.0152	6.6119	6.5105	6.3388	6.4376	6.8732	6.8198	6.8014	5.599	5.0582	5.451	6.266	6.2326	6.3948	5.8001	5.6043	5.2653	5.7475	6.1907	6.0031
hsa-miR-3616-3p	4.34545	0	2.18767e-09	4.34545	20.3288	UP		0	0	0	0	0	0	0	0	0	0	0	5.041	4.7687	5.154	4.9579	4.9314	5.2677	3.9256	0	4.1742	4.3766	5.3798	4.1685
hsa-miR-3618	2.68167	0.338	0.000730772	2.34367	5.07591	UP		0	0	0	0	0	0	0	0	3.718	0	0	3.4561	3.3357	0	3.1505	3.709	3.3417	3.6626	4.2564	0	0	4.0063	3.2617
hsa-miR-3622b-3p	2.76996	4.73362	0.00585632	-1.96366	3.9005	DOWN		4.5593	4.4984	5.4896	4.6229	3.8323	5.4377	4.6384	4.5201	5.4285	4.6563	4.3863	3.9586	4.3357	4.0247	4.4725	4.5835	4.3417	0	0	0	0	3.8688	3.654
hsa-miR-362-5p	1.77487	4.47748	0.000113393	-2.70261	6.50977	DOWN		4.3989	4.3464	4.3965	4.0823	4.7068	4.9017	4.2233	4.2888	4.4285	4.8198	4.6593	3.4561	0	0	3.7355	0	4.1073	0	0	0	3.5187	3.6343	2.8466
hsa-miR-3648	3.37016	5.17719	0.000327898	-1.80703	3.49922	DOWN		5.3558	4.5457	6.4669	4.9083	3.7834	5.0392	5.4864	4.8527	6.4874	5.2219	4.8014	4.041	3.8212	0	3.266	4.2115	3.4792	3.6626	4.2564	3.6506	2.9781	4.3542	2.7211
hsa-miR-3669	0	5.00395	1.90147e-18	-5.00395	32.0876	DOWN		4.3114	4.6359	5.1901	5.689	4.3178	5.3871	4.7088	5.5201	5.8732	4.1824	5.2276	0	0	0	0	0	0	0	0	0	0	0	0
hsa-miR-3674	7.19372	8.48877	1.06551e-05	-1.29505	2.45385	DOWN		7.8192	8.5044	9.3194	8.4963	7.7865	8.8744	7.8003	9.3426	8.33	8.3162	8.7872	7.7291	7.4567	7.002	6.7944	7.7894	7.3052	6.626	8.2232	7.1663	6.7571	6.9563	6.519
hsa-miR-3679-3p	0.587558	4.75784	1.81592e-08	-4.17028	18.0044	DOWN		4.3114	4.9838	5.3476	5.7314	4.5402	3.9017	3.9014	5.4931	5.346	3.3344	5.4452	0	0	0	0	3.709	3.3417	0	0	0	0	0	0
hsa-miR-3682-5p	2.6073	0.3303	0.0031668	2.277	4.84669	UP		3.6333	0	0	0	0	0	0	0	0	0	0	3.193	0	3.6097	4.266	3.709	4.4792	0	4.1189	0	0	2.8688	5.043
hsa-miR-3688-3p	4.82134	2.16335	0.000332606	2.658	6.31156	UP		4.7037	3.4984	0	0	3.2474	0	4.4039	0	3.8435	4.0999	0	5.193	4.8212	5.154	4.9918	4.879	4.6636	5.563	4.9669	3.8985	4.8762	4.3018	4.5471
hsa-miR-3691-5p	3.61591	4.53476	0.00204341	-0.918855	1.89061	DOWN		3.7708	4.3989	5.6189	4.4303	4.0129	3.9017	4.1238	5.0506	5.931	3.7129	4.9306	3.6785	4.2617	3.3466	4.3205	3.709	3.9267	3.6626	4.1189	3.11	2.8406	3.2473	3.1685
hsa-miR-372-3p	4.60562	0.354673	4.9121e-10	4.25095	19.0399	UP		0	0	0	0	0	0	3.9014	0	0	0	0	4.041	5.4732	4.5483	4.851	4.5835	4.5434	4.563	6.1545	4.5086	3.9781	4.3018	3.7211
hsa-miR-374c-5p	0	1.68493	0.00734021	-1.68493	3.21524	DOWN		0	0	4.5771	2.9448	0	0	3.6384	3.5725	0	0	3.8014	0	0	0	0	0	0	0	0	0	0	0	0
hsa-miR-377-3p	0	3.75624	1.19727e-06	-3.75624	13.5126	DOWN		3.8964	3.9838	0	4.2079	4.5402	5.709	5.0169	5.1227	0	4.8704	3.9713	0	0	0	0	0	0	0	0	0	0	0	0
hsa-miR-378a-3p	8.42656	8.97074	0.00022225	-0.544178	1.45819	DOWN		9.1506	9.1326	8.775	8.7024	9.1875	9.4158	9.2648	8.4198	9.0851	8.8453	8.6992	8.6785	8.0472	8.7112	8.0127	8.5835	8.6528	8.2233	7.9669	8.6534	8.6582	8.4478	8.4832
hsa-miR-378c	6.63693	7.32101	1.06129e-05	-0.684076	1.60667	DOWN		7.2887	7.5457	7.3723	7.1227	7.4213	7.709	7.3825	7.032	7.0267	7.3612	7.269	7.289	5.8964	6.8951	6.4482	6.6159	6.9505	6.4422	6.4408	6.6048	6.5955	6.7853	6.6795
hsa-miR-378d	4.52876	5.66033	2.17966e-06	-1.13157	2.19097	DOWN		5.6333	6.1765	5.7376	5.1775	5.5548	6.2236	5.9014	4.9746	6.1412	5.6563	5.0868	5.1565	4.1013	4.7252	4.5198	4.446	4.3417	3.7557	4.1189	4.8985	4.7281	4.5913	4.9621
hsa-miR-378i	4.17978	4.87399	0.000908007	-0.694208	1.618	DOWN		5.1694	5.0834	5.534	4.7928	4.3517	4.4866	5.1238	4.5201	5.346	4.8198	4.3863	4.8711	4.4061	4.3466	3.3729	4.7679	4.0198	4.0036	4.4974	4.0429	3.8406	4.4049	3.5836
hsa-miR-3936	0	2.09555	0.0017221	-2.09555	4.2739	DOWN		0	3.679	4.3965	0	0	4.1647	0	3.4656	3.959	0	3.3863	0	0	0	0	0	0	0	0	0	0	0	0
hsa-miR-3943	4.03185	1.71826	0.00132084	2.31359	4.97117	UP		0	3.1765	4.5771	3.7104	0	0	0	3.4656	0	0	3.9713	5.0806	3.8212	3.4842	4.775	4.6476	4.5434	3.7557	5.2564	3.2356	3.1036	3.7168	2.9621
hsa-miR-3974	4.9518	5.81695	0.00963951	-0.865155	1.82153	DOWN		5.7708	6.2497	6.5557	5.9083	4.9478	6.1647	4.6384	6.1915	6.3029	5.5974	5.6593	5.8253	4.8718	4.3466	4.9231	5.7679	6.1283	3.3406	5.8844	4.7381	4.2191	5.0704	4.306
hsa-miR-421	8.55025	7.61108	4.649e-05	0.939168	1.91742	UP		8.2829	7.5745	7.3225	7.3371	7.6084	7.4624	7.9747	7.579	7.5894	7.2413	7.7497	8.367	7.7349	9.3147	8.3338	8.2115	8.3327	9.4699	8.0731	8.6785	8.5493	8.2816	9.256
hsa-miR-423-3p	8.66207	9.19028	0.00098424	-0.528215	1.44214	DOWN		9.1284	9.0854	8.6343	9.8944	9.48	9.2522	8.8123	9.3964	9.0399	9.1443	9.2255	9.0107	8.9416	8.5444	8.7405	8.5207	9.1619	8.3481	8.1189	8.3159	8.9822	8.8183	8.4416
hsa-miR-4260	0.239067	2.24954	0.00273596	-2.01047	4.02913	DOWN		0	3.1765	0	0	2.3849	4.4866	3.6384	3.4656	4.2585	3.3344	0	0	0	0	0	0	0	0	0	0	0	2.8688	0
hsa-miR-4288	2.3633	0	0.000294556	2.3633	5.14546	UP		0	0	0	0	0	0	0	0	0	0	0	4.2634	3.7142	0	3.266	3.446	3.3417	0	4.4974	0	0	2.8688	2.9621
hsa-miR-4318	0	6.52818	1.23372e-17	-6.52818	92.2951	DOWN		6.0118	6.9578	7.2039	7.1227	6.6465	6.1945	4.7088	8.0644	6.5065	6.0999	6.2932	0	0	0	0	0	0	0	0	0	0	0	0
hsa-miR-4328	0	2.26989	0.000344245	-2.26989	4.82287	DOWN		0	3.3989	0	0	2.5104	4.2802	3.7759	3.5725	3.718	3.7129	0	0	0	0	0	0	0	0	0	0	0	0	0
hsa-miR-4426	0	1.75433	0.00666544	-1.75433	3.37369	DOWN		0	3.679	4.297	0	0	0	0	3.7652	3.959	3.5974	0	0	0	0	0	0	0	0	0	0	0	0	0
hsa-miR-4440	5.77494	3.04671	0.000345099	2.72823	6.62643	UP		3.6333	4.1151	5.9159	3.5298	3.0954	0	4.1238	4.0871	5.0134	0	0	5.8484	6.4061	5.8827	5.8875	5.7388	5.4792	4.6137	7.5249	5.4055	5.2466	5.7563	5.5096
hsa-miR-4446-3p	4.41668	2.11829	0.00122184	2.29839	4.91909	UP		0	3.7614	0	4.2668	3.3178	4.1647	0	3.4656	0	0	4.3249	4.4561	5.4401	4.3466	4.0891	5.2534	3.9267	4.563	5.1189	4.1742	3.8406	4.0063	3.7852
hsa-miR-4451	4.74964	4.0457	0.00854117	0.703942	1.62895	UP		3.7708	4.5915	4.6596	3.9448	2.5104	4.0392	4.0169	5.0131	4.6508	3.5974	3.7082	5.0806	5.2233	5.154	4.4236	4.8245	4.7202	3.7557	5.2564	4.5575	4.2191	5.1616	4.6192
hsa-miR-4454	5.45982	6.93248	5.95696e-06	-1.47267	2.77534	DOWN		7.4713	6.6249	6.3225	7.2595	7.1781	5.9017	7.1109	6.731	6.6848	7.5202	7.4524	5.8018	4.1013	4.8827	5.266	4.5164	5.7747	5.8642	5.6043	5.8404	6.2052	5.9898	5.671
hsa-miR-4481	2.71048	4.37775	0.00802689	-1.66727	3.17613	DOWN		4.8964	4.5915	5.775	4.2668	2.8323	4.9017	3.7759	5.1915	3.8435	3.8198	4.2608	3.193	0	4.1122	3.3729	0	3.7202	3.0776	4.9669	0	3.2191	3.7948	3.069
hsa-miR-4490	0	1.58231	0.00716088	-1.58231	2.99449	DOWN		0	3.5915	0	3.3233	0	4.2802	0	3.0871	0	0	3.1233	0	0	0	0	0	0	0	0	0	0	0	0
hsa-miR-4505	3.00281	0.789082	0.00117785	2.21373	4.63872	UP		0	0	0	3.0823	2.2474	0	0	3.3502	0	0	0	3.4561	3.7142	0	3.5656	4.031	3.9267	3.563	0	3.11	3.1036	4.3018	3.2617
hsa-miR-4510	11.0277	7.5083	3.69206e-13	3.51938	11.4667	UP		8.5922	7.3194	7.9895	6.689	7.0287	7.6132	8.0512	7.1746	7.4874	7.5593	7.0868	9.8851	11.204	10.858	11.51	10.882	10.785	11.6	10.949	11.385	11.66	10.381	11.233
hsa-miR-4516	7.13308	5.50925	0.000138881	1.62383	3.08192	UP		6.5782	5.9491	6.1043	5.5536	4.9915	5.8651	6.0169	4.6721	5.9024	4.2604	4.7082	6.5005	7.465	8.5639	6.1202	7.525	7.4792	7.4139	7.6425	7.3785	6.0265	8.0704	5.4114
hsa-miR-451a	14.0104	15.362	0.000786637	-1.35158	2.55192	DOWN		16.897	14.99	15.527	13.674	15.66	15.71	15.908	14.92	15.814	15.076	14.806	12.622	12.739	14.642	13.994	13.694	13.436	14.763	13.85	15.012	14.762	13.616	14.995
hsa-miR-4635	5.70743	4.92175	0.000955142	0.78568	1.7239	UP		4.5593	4.7614	6.1043	5.1465	4.449	5.0392	4.5644	5.4376	5.0134	4.4048	4.6593	5.9796	6.1013	5.9789	6.1354	5.879	5.9024	5.5106	6.1189	4.5086	5.6886	5.3798	5.306
hsa-miR-4640-5p	0.813533	3.66011	0.000664884	-2.84658	7.19291	DOWN		4.2183	3.9134	5.8819	4.6229	3.3178	5.3346	0	4.5201	4.0659	0	4.3863	3.3305	0	0	0	0	0	0	0	0	2.9781	3.4538	0
hsa-miR-4664-5p	2.14679	0.264855	0.00766869	1.88194	3.6857	UP		0	2.9134	0	0	0	0	0	0	0	0	0	4.119	0	3.3466	2.8875	0	3.8271	3.2151	4.4974	0	0	3.8688	0
hsa-miR-4677-5p	4.15913	2.30089	0.00303609	1.85824	3.62566	UP		3.6333	3.1765	4.7376	3.3233	3.0129	0	0	0	4.1654	0	3.2608	4.119	4.968	4.0247	4.266	4.031	4.1897	3.7557	4.4974	3.7381	3.7666	4.0063	4.5471
hsa-miR-4683	5.0437	6.05465	0.000499244	-1.01095	2.01523	DOWN		5.9261	5.7614	7.2311	6.4809	5.0752	6.3077	4.7759	6.6356	6.4285	5.8198	6.1589	5.119	5.1013	5.5483	5.3729	5.372	5.1897	4.0776	5.4974	4.351	5.0733	5.2748	4.5471
hsa-miR-4685-5p	1.54503	3.73075	0.00535635	-2.18572	4.54954	DOWN		3.6333	4.0509	4.8116	3.7104	3.0954	4.9017	4.3164	3.7652	4.4285	0	4.3249	0	3.9207	0	3.025	4.294	0	0	0	3.11	0	4.1907	0
hsa-miR-4687-5p	5.28109	4.46509	0.00272358	0.816001	1.76052	UP		4.1188	4.2354	5.2445	4.5298	3.1734	4.8277	4.9014	5.0131	4.6508	3.9193	4.5018	5.9372	5.3714	5.5793	5.4725	5.5835	5.4792	4.6137	6.1893	4.695	4.326	5.4049	4.7211
hsa-miR-4697-5p	0	2.41269	0.00043261	-2.41269	5.32467	DOWN		0	2.9134	4.8116	4.0152	3.0129	4.8277	0	3.5725	0	0	3.3863	0	0	0	0	0	0	0	0	0	0	0	0
hsa-miR-4732-3p	8.10814	7.11587	0.00914491	0.992269	1.98931	UP		8.7667	7.278	7.297	6.0986	7.4012	6.7892	7.6111	6.5981	7.3029	6.8069	6.3249	7.2548	7.1534	9.3466	8.2202	7.6939	7.84	9.5582	7.4552	8.5424	9.1571	6.7563	8.3196
hsa-miR-4744	1.84813	4.24915	0.0037749	-2.40101	5.28174	DOWN		4.5593	3.679	5.7376	4.8708	4.3178	4.9017	0	5.0506	4.4285	4.536	4.6593	3.3305	0	0	3.7355	0	4.1073	0	4.7039	0	0	3.4538	2.8466
hsa-miR-4748	5.01472	3.65662	0.00385981	1.35811	2.56349	UP		4.1188	4.0509	4.8819	3.2079	4.283	3.9017	4.1238	3.5725	4.5805	0	3.5018	4.119	4.1013	4.8827	4.775	5.1685	4.7747	4.6626	6.0064	5.6506	4.8762	5.3282	5.8315
hsa-miR-4760-3p	0.49585	4.95807	8.23245e-10	-4.46222	22.0426	DOWN		3.8964	4.8394	6.0442	5.4043	4.9027	4.1647	4.0169	6.6356	5.0659	4.5974	4.9713	0	0	0	0	0	0	0	0	0	3.1036	0	2.8466
hsa-miR-4764-5p	0	1.75415	0.00766642	-1.75415	3.37329	DOWN		0	2.9134	4.8116	0	0	4.0392	0	3.4656	4.0659	0	0	0	0	0	0	0	0	0	0	0	0	0	0
hsa-miR-4781-5p	0	2.61999	4.13947e-05	-2.61999	6.14746	DOWN		0	3.9838	3.9491	2.9448	2.5104	0	3.6384	4.5201	0	3.4719	3.8014	0	0	0	0	0	0	0	0	0	0	0	0
hsa-miR-4782-5p	1.48173	5.42683	8.67115e-07	-3.94509	15.4025	DOWN		5.1188	5.3464	5.8116	6.0152	5.1349	5.2236	5.0713	5.994	5.5805	4.5974	5.8014	3.4561	4.0138	3.4842	3.9579	0	0	0	0	0	0	2.8688	0
hsa-miR-4788	0.797267	3.25898	0.00119024	-2.46172	5.50871	DOWN		3.7708	4.2919	4.9491	3.7928	3.2474	0	3.6384	4.8527	0	3.3344	3.9713	0	3.5988	0	0	0	0	0	0	0	0	3.0063	2.9621
hsa-miR-4789-5p	0	2.66091	6.02055e-05	-2.66091	6.32431	DOWN		0	3.5915	5.2445	3.0823	2.3849	0	0	3.7652	4.2585	3.3344	3.6087	0	0	0	0	0	0	0	0	0	0	0	0
hsa-miR-4796-5p	0	2.44009	0.0021343	-2.44009	5.42676	DOWN		0	4.5457	5.6596	3.0823	0	0	0	4.4656	5.1165	0	3.9713	0	0	0	0	0	0	0	0	0	0	0	0
hsa-miR-4804-3p	0.847008	3.23253	0.00241439	-2.38552	5.22532	DOWN		4.7037	3.7614	5.2445	3.8708	2.3849	3.9017	3.6384	0	4.718	3.3344	0	0	0	0	2.8875	0	0	3.9256	0	3.351	0	0	0
hsa-miR-4804-5p	0	2.09449	0.00179956	-2.09449	4.27075	DOWN		0	4.2354	3.8116	0	0	0	0	3.0871	4.5065	3.5974	3.8014	0	0	0	0	0	0	0	0	0	0	0	0
hsa-miR-495-3p	0	2.18185	0.00181756	-2.18185	4.53736	DOWN		0	3.1765	3.9491	0	4.2474	0	4.5644	4.4656	0	3.5974	0	0	0	0	0	0	0	0	0	0	0	0	0
hsa-miR-497-3p	3.90048	0.617327	1.33458e-05	3.28316	9.73483	UP		0	0	0	0	2.6259	4.1647	0	0	0	0	0	4.778	4.4061	4.417	4.266	4.7679	4.6048	3.3406	0	2.9725	4.7666	4.8323	3.654
hsa-miR-497-5p	4.64563	6.2522	6.76294e-08	-1.60657	3.04526	DOWN		7.5688	6.4495	6.0132	5.7726	6.2108	5.6241	6.0444	6.0131	6.718	6.0348	6.3249	4.5715	4.4061	4.8321	4.61	4.5835	3.8271	4.7557	5.1893	4.8205	4.4729	4.2473	5.4316
hsa-miR-5001-3p	3.88918	2.12188	0.0078948	1.7673	3.40417	UP		4.3114	3.7614	3.9491	0	3.3178	0	0	3.5725	4.4285	0	0	4.193	4.0138	4.0247	3.8135	4.031	4.0198	3.3406	4.2564	3.458	4.1036	4.2473	3.1685
hsa-miR-5009-5p	2.71218	0.488245	0.00117385	2.22393	4.67164	UP		0	0	0	0	2.2474	0	0	0	0	0	3.1233	3.6785	0	3.4842	4.1505	4.031	3.3417	3.4561	0	0	3.6886	3.4538	3.2617
hsa-miR-5010-5p	5.14719	4.32185	0.000468792	0.825337	1.77195	UP		5.2183	4.0509	3.9491	4.2079	4.1734	4.2802	3.6384	4.8945	4.5065	4.8198	3.8014	4.4561	5.0582	5.6686	4.775	5.2115	5.3052	5.733	4.797	5.6048	5.541	4.3542	5.2617
hsa-miR-501-3p	6.33482	6.87168	0.00531477	-0.536865	1.45082	DOWN		7.6864	7.4741	7.4085	6.6563	7.0392	6.4624	6.7922	6.409	6.5065	6.4218	6.7321	5.9586	5.7952	6.9789	5.9579	6.1241	6.3948	6.9054	6.1189	6.4055	6.4494	6.4776	6.4515
hsa-miR-505-3p	5.22232	5.72515	0.0050791	-0.502838	1.417	DOWN		6.0118	6.1151	5.9815	5.7104	5.6259	5.709	5.6019	5.7425	4.8435	5.567	6.0681	5.2974	5.7142	5.8061	5.3985	4.6476	5.1897	5.0411	4.9669	5.0429	4.4729	5.4538	5.6367
hsa-miR-510-3p	8.98571	6.54039	1.86626e-06	2.44532	5.44645	UP		6.2421	6.4741	7.3225	6.6563	6.6119	5.1647	6.3825	7.5201	5.468	6.7539	7.3482	8.6492	9.096	7.8256	8.8625	10.068	9.5056	9.5854	8.0258	9.6193	10.226	9.6116	6.7535
hsa-miR-512-5p	2.5803	0.3255	0.00280781	2.2548	4.77268	UP		0	0	0	0	0	0	0	0	3.5805	0	0	4.7291	3.4732	0	3.8135	3.446	3.9267	4.2151	4.2564	0	3.1036	0	0
hsa-miR-5193	5.28801	4.42881	0.000657038	0.859199	1.81403	UP		3.7708	4.7614	5.6991	4.4809	3.3178	4.4866	4.2233	4.8096	4.0659	4.6563	4.4452	5.363	4.7142	5.9789	5.1803	5.6159	5.8527	5.5106	5.3205	5.11	4.6886	5.1318	4.9896
hsa-miR-542-3p	7.33136	6.46962	0.00416693	0.86174	1.81723	UP		5.669	6.7311	7.1478	6.0823	6.2742	6.2802	5.871	6.8737	5.468	7.1924	7.5761	8.1095	6.8718	6.5946	6.3858	7.7461	8.0696	6.7215	7.3668	7.1425	7.2122	7.9435	7.8124
hsa-miR-548a-3p	2.82211	4.89094	0.00178713	-2.06883	4.19546	DOWN		3.6333	4.801	6.1901	5.3233	4.7583	5.0392	4.6384	4.9351	5.6848	3.4719	5.3249	3.8711	3.4732	3.7252	4.4725	3.8245	4.0198	0	0	3.11	2.9781	0	4.3909
hsa-miR-548ac	3.12013	5.00661	0.00106959	-1.88648	3.69731	DOWN		5.3558	4.9491	6.0132	4.8324	3.3849	5.3346	5.4039	5.3799	5.2585	4.4048	4.7556	3.8711	4.2617	0	4.3729	3.5835	3.3417	3.4561	4.1189	0	4.0422	3.1318	3.2617
hsa-miR-548ao-5p	2.15689	4.42821	0.0040768	-2.27132	4.82764	DOWN		3.8964	4.1765	3.9491	4.6229	4.3849	5.2236	4.6384	4.5725	3.8435	4.4719	4.9306	4.119	0	0	4.3729	0	4.1073	4.0776	5.5519	0	0	0	3.654
hsa-miR-548au-5p/548c-5p/548o-5p/548am-5p	4.76133	5.54585	0.000927357	-0.784521	1.72252	DOWN		6.1188	5.2919	4.8116	5.1465	5.3849	6.6883	5.9889	4.9351	5.3878	5.4048	5.8457	4.9155	4.0138	5.1122	4.7355	4.6476	4.6636	5.2151	4.6043	5.0429	4.1625	4.5913	5.4316
hsa-miR-548ay-3p	4.54378	2.62224	0.00156827	1.92154	3.78827	UP		0	3.0509	3.9491	4.5298	2.6259	3.9017	0	3.4656	0	3.8198	3.5018	4.778	5.6862	4.5483	4.653	4.6476	5.2677	4.2792	4.1189	3.8205	4.4256	4.1318	4.1685
hsa-miR-548ay-5p	3.01258	0.972482	0.0049162	2.0401	4.11274	UP		3.7708	3.8394	0	0	0	0	0	3.0871	0	0	0	4.119	0	3.3466	3.3729	0	3.6048	3.6626	4.1189	3.6506	3.7666	3.2473	3.2617
hsa-miR-548c-3p	2.27488	0.513291	0.00945722	1.76159	3.39072	UP		0	2.9134	0	0	2.7328	0	0	0	0	0	0	3.193	0	3.7252	4.266	3.446	0	3.4561	0	3.6506	2.8406	0	2.7211
hsa-miR-548y	2.26236	4.12205	0.00209063	-1.8597	3.62931	DOWN		4.4813	3.679	4.6596	4.2079	2.9254	4.3871	4.3164	3.6721	4.5065	4.1824	4.3249	3.778	0	0	3.3729	3.5835	3.6048	3.563	0	0	2.9781	3.0063	3.2617
hsa-miR-554	2.0205	4.51908	0.000302767	-2.49858	5.6513	DOWN		3.7708	4.3464	5.8472	4.9083	3.6803	5.1033	4.2233	5.0506	4.2585	4.4719	4.0493	3.8711	3.3357	0	2.8875	0	0	3.0776	4.1189	0	3.6061	0	3.3491
hsa-miR-5583-5p	0.549508	3.20971	0.00041545	-2.6602	6.32121	DOWN		4.6333	4.3989	4.6596	3.6229	2.2474	4.0392	0	4.6232	3.959	0	3.1233	0	0	0	0	0	0	0	0	0	3.4256	0	3.1685
hsa-miR-5585-5p	0	1.61534	0.00749237	-1.61534	3.06383	DOWN		3.6333	2.9134	4.1901	2.9448	0	0	0	4.0871	0	0	0	0	0	0	0	0	0	0	0	0	0	0	0
hsa-miR-5589-5p	3.92111	0.633664	4.89263e-07	3.28744	9.76381	UP		0	3.4984	0	0	0	0	0	0	0	3.4719	0	3.8711	4.1013	3.3466	3.7355	4.8245	5.3417	3.6626	4.4974	3.2356	2.8406	4.2473	3.3491
hsa-miR-5692a	4.37802	4.95405	0.00943359	-0.576038	1.49075	DOWN		5.1694	4.8394	5.9159	4.8324	4.283	5.0392	5.3164	4.8945	4.6508	4.2604	5.2932	4.119	4.1837	4.6097	4.3205	4.372	4.1897	5.148	5.2564	4.351	4.326	3.3542	4.306
hsa-miR-5706	1.27532	3.45501	0.00961762	-2.17969	4.53057	DOWN		0	4.2354	4.9491	4.2079	3.2474	4.7497	4.4039	4.1575	4.346	0	3.7082	3.4561	0	0	0	3.709	4.0198	0	4.1189	0	0	0	0
hsa-miR-579-5p	4.23289	2.21806	0.00122836	2.01483	4.04132	UP		3.6333	3.9134	3.9491	0	2.2474	0	0	3.2246	3.959	3.4719	0	4.2634	3.5988	4.2726	4.653	4.031	4.1897	3.7557	4.9669	4.0429	4.5187	4.7168	3.7852
hsa-miR-585-5p	0.588217	2.69887	0.00452542	-2.11066	4.31888	DOWN		0	0	4.5771	2.9448	3.0954	4.1647	3.6384	4.2246	0	3.3344	3.7082	0	0	0	0	0	3.6048	0	0	0	0	3.4538	0
hsa-miR-604	5.20156	2.53337	0.00020366	2.66819	6.35629	UP		0	3.9838	4.3965	3.6229	0	4.2802	0	4.1575	4.1654	0	3.2608	5.4257	5.5684	5.1946	5.3985	5.1685	5.5116	4.5106	5.7039	5.0769	4.9449	5.1616	4.7535
hsa-miR-605-5p	0	2.24364	0.0016399	-2.24364	4.73589	DOWN		0	3.9134	4.297	0	0	4.5797	0	3.8527	4.0659	0	3.9713	0	0	0	0	0	0	0	0	0	0	0	0
hsa-miR-6068	1.43433	4.53625	2.6706e-05	-3.10192	8.58561	DOWN		4.3989	4.2919	5.9815	5.1148	3.2474	4.2802	3.6384	4.6721	4.6508	4.536	5.0868	0	3.7142	0	2.8875	3.8245	0	0	0	0	0	3.1318	3.654
hsa-miR-6126	7.62177	8.7231	0.00405073	-1.10133	2.14553	DOWN		7.7037	8.2281	9.0014	9.484	7.8621	8.2522	8.3333	9.811	8.5439	9.7757	8.9587	8.8282	7.2992	7.4426	6.3858	7.9506	7.4207	6.7891	6.9055	6.9635	7.541	9.1616	8.7734
hsa-miR-6129	6.02385	2.57376	9.8633e-07	3.45009	10.929	UP		0	3.4984	4.3965	4.0152	3.0129	0	0	3.3502	3.5805	3.3344	3.1233	5.626	6.2992	5.7796	6.4844	5.5164	5.9505	6.0225	6.5783	5.458	5.911	5.8137	6.8466
hsa-miR-6130	7.77341	4.5873	2.93012e-14	3.18611	9.10153	UP		3.6333	4.8769	5.297	4.4809	4.0547	4.9017	4.4039	4.3502	4.5805	4.8704	5.0108	7.6193	8.1118	7.2631	8.2556	7.4095	7.9327	7.3406	8.0162	7.3017	7.8224	7.9605	8.2475
hsa-miR-614	1.77903	3.78149	0.00870265	-2.00246	4.00682	DOWN		4.0118	3.3989	4.9491	4.5771	3.7328	4.1647	0	4.7652	4.7821	3.7129	3.5018	3.3305	0	3.3466	0	0	0	0	4.3819	0	3.7666	3.4538	3.069
hsa-miR-617	2.14467	0	0.00168606	2.14468	4.42193	UP		0	0	0	0	0	0	0	0	0	0	0	4.041	4.4061	0	0	0	0	0	4.797	2.9725	3.2191	3.4538	2.8466
hsa-miR-619-3p	4.13019	2.51802	0.00523667	1.61217	3.05712	UP		0	2.9134	4.6596	3.7104	2.2474	0	0	3.3502	3.8435	3.4719	3.5018	4.3305	4.1837	4.5483	4.3729	4.5835	4.3417	4.2792	4.7039	3.6506	3.9781	3.0063	3.5836
hsa-miR-621	2.24906	0.267709	0.00735615	1.98135	3.94862	UP		0	0	0	2.9448	0	0	0	0	0	0	0	3.6785	0	3.6097	5.1505	3.5835	3.8271	0	0	0	0	4.0704	3.069
hsa-miR-628-3p	8.29253	7.44798	1.35566e-06	0.844552	1.79571	UP		6.9979	7.4619	7.5877	7.6782	7.6568	7.9721	6.871	7.1915	7.3671	7.4719	7.6717	7.9372	8.4567	7.9376	7.8739	8.3767	8.7375	8.1523	8.6235	8.1425	8.3292	8.3986	8.5447
hsa-miR-629-3p	7.76387	6.42828	5.75062e-07	1.33558	2.52378	UP		6.7543	6.2354	7.1621	5.7726	6.2383	6.557	6.84	6.409	6.0399	6.5974	6.1051	8.056	7.2992	8.8191	7.7204	7.8856	8.239	7.5695	7.1893	7.3371	7.184	7.7168	8.1504
hsa-miR-629-5p	10.0553	9.31305	0.00280209	0.742245	1.67278	UP		10.277	9.2657	9.9243	8.6863	9.1434	9.3279	9.6042	9.1575	8.9024	9.1392	9.0157	10.026	9.5077	11.496	9.7317	10.159	10.105	10.217	9.2274	9.8842	9.8991	9.7745	10.636
hsa-miR-640	3.12173	0.577082	0.000259336	2.54465	5.83467	UP		0	0	0	0	0	0	0	3.2246	0	0	3.1233	3.8711	3.5988	0	3.8135	3.5835	4.1897	0	4.2564	3.6506	3.5187	3.5469	3.4316
hsa-miR-6505-3p	3.92333	2.03342	0.00480283	1.88992	3.70613	UP		4.4813	3.4984	0	0	2.8323	0	0	3.4656	0	3.3344	4.7556	3.778	3.7142	3.3466	3.7355	4.031	4.1897	3.3406	4.797	4.0429	3.2191	4.3018	4.5836
hsa-miR-652-3p	5.48039	6.47484	2.16422e-05	-0.994445	1.99231	DOWN		6.7208	6.3859	6.6596	6.8613	6.7647	6.5797	6.4457	6.3945	5.931	6.0348	6.4452	5.2974	4.7142	4.9316	5.7944	5.5164	5.3773	5.3406	5.0449	5.673	6.7571	5.3282	5.9896
hsa-miR-660-5p	8.1159	9.56201	2.02658e-08	-1.44611	2.72472	DOWN		10.197	9.7169	9.8002	9.2811	9.7631	9.0676	9.7131	9.3614	10.055	9.0181	9.2086	7.9848	7.2899	8.8061	8.025	7.9758	7.788	8.4316	7.9159	8.03	8.1876	8.3861	8.57
hsa-miR-664a-5p	7.81591	7.27336	0.000238297	0.542545	1.45654	UP		6.5012	7.1151	7.4669	7.8708	6.9534	7.591	7.0169	7.4726	7.0659	7.3253	7.6279	7.8541	8.1937	7.8702	7.7701	7.8655	8.0477	7.75	7.6796	7.7328	7.7901	7.6762	7.5609
hsa-miR-6727-3p	3.40494	1.08039	0.00170611	2.32455	5.0091	UP		0	0	4.1901	3.7928	0	0	3.9014	0	0	0	0	3.9586	3.5988	3.3466	3.266	4.446	4.7747	3.4561	4.3819	3.458	3.1036	0	3.069
hsa-miR-6751-3p	2.39112	0	0.000270858	2.39112	5.24563	UP		0	0	0	0	0	0	0	0	0	0	0	3.778	3.3357	3.7252	3.9579	0	0	3.0776	0	0	3.1036	4.5469	3.1685
hsa-miR-6752-5p	5.08383	5.76872	0.00870138	-0.684885	1.60757	DOWN		5.3558	5.8583	6.7184	5.8897	4.6534	6.2522	5.4039	5.7425	5.9865	5.7938	5.8014	5.193	6.4401	5.1122	5.1803	5.446	4.5434	4.4561	5.4974	5.323	4.6886	5.0063	4.1196
hsa-miR-675-3p	1.39746	4.15115	0.00331348	-2.75369	6.74439	DOWN		0	5.6576	6.534	4.8708	0	5.4866	4.4039	5.3799	5.931	3.5974	3.8014	3.193	0	0	3.1505	4.031	0	0	0	0	3.326	0	3.069
hsa-miR-6756-3p	6.74733	5.76914	0.000162592	0.978197	1.97	UP		5.3558	6.3057	6.4438	5.4043	4.5402	6.2802	4.7759	6.3799	6.3029	5.8704	5.8014	7.0708	7.1118	6.8702	6.9665	6.8923	6.8902	6.148	6.9669	6.5454	6.3131	6.5913	6.6015
hsa-miR-6757-5p	2.29256	5.00515	0.000783088	-2.7126	6.555	DOWN		4.7037	5.2062	6.8295	5.3778	3.6259	4.9721	4.4039	5.8096	5.6848	3.4719	4.9713	4.8711	0	4.0247	4.025	3.709	0	3.0776	4.797	0	0	3.0063	0
hsa-miR-676-3p	1.5569	5.06736	1.07156e-05	-3.51046	11.3961	DOWN		5.4813	5.1151	6.2175	5.1775	4.4173	5.7497	4.6384	5.1227	5.1654	4.0999	4.5562	3.6785	0	0	0	0	0	3.2151	4.2564	3.8985	0	3.6343	0
hsa-miR-6769b-3p	6.46609	5.21508	7.02174e-05	1.25101	2.38008	UP		4.7708	5.679	6.4896	5.6002	4.5979	5.4866	4.3164	5.6959	5.1165	4.7673	4.8457	7.289	7.0025	6.5639	6.5081	6.7823	6.5896	5.885	6.8414	6.2505	6.4845	6.3798	5.0165
hsa-miR-6773-5p	0	2.80976	4.14823e-05	-2.80976	7.0117	DOWN		0	4.5457	5.0746	3.7104	2.9254	0	0	3.8527	3.718	3.8198	3.2608	0	0	0	0	0	0	0	0	0	0	0	0
hsa-miR-6781-3p	3.06765	0.546591	0.00138752	2.52106	5.74003	UP		0	0	0	0	2.9254	0	0	3.0871	0	0	0	3.778	4.3357	3.8321	4.3205	3.446	0	0	5.655	3.8205	3.2191	4.4049	0
hsa-miR-6781-5p	3.79251	5.81694	9.66162e-05	-2.02443	4.06831	DOWN		6.1188	5.6359	7.2311	6.3644	5.1543	5.8651	4.84	6.2888	5.6161	5.37	5.5018	4.778	4.4732	4.5483	3.7355	0	4.0198	4.0036	4.3819	4.0429	3.5187	3.9392	4.069
hsa-miR-6790-5p	4.55053	5.30699	0.009642	-0.756458	1.68934	DOWN		4.9553	5.1461	5.1901	6.1621	4.3178	4.5797	4.9603	5.5981	6.0134	5.8198	5.6342	5.778	5.1431	4.1122	4.3205	4.2115	3.6048	4.5106	5.1893	3.8205	3.9781	5.3542	4.5836
hsa-miR-6800-3p	2.4921	5.09088	0.000405722	-2.59878	6.05775	DOWN		5.2183	4.5457	6.3965	5.7928	4.3849	5.4866	3.7759	5.0871	5.2585	4.9666	5.0868	3.5715	0	0	3.9579	0	3.9267	3.7557	5.2564	0	3.6061	3.2473	2.5836
hsa-miR-6801-3p	1.53327	4.88748	1.83772e-05	-3.35421	10.2263	DOWN		4.9553	4.679	5.3476	5.7104	4.0547	5.5339	4.0169	5.3799	4.4285	4.7673	4.8888	0	3.5988	0	0	3.8245	0	0	4.797	3.11	0	0	3.069
hsa-miR-6804-3p	0.794017	4.69802	5.35178e-08	-3.904	14.97	DOWN		4.4813	3.9134	5.9159	5.2079	4.1734	3.9017	4.4864	5.3198	5.3878	4.3344	4.5562	0	0	0	3.4725	0	0	3.0776	0	0	2.9781	0	0
hsa-miR-6804-5p	2.5539	0.267709	0.00036735	2.28619	4.87767	UP		0	0	0	2.9448	0	0	0	0	0	0	0	3.3305	4.0138	3.6097	2.8875	3.446	3.8271	3.3406	0	2.9725	3.2191	0	0
hsa-miR-6815-3p	2.7111	0.675773	0.00594815	2.03533	4.09916	UP		0	3.7614	0	0	0	0	0	3.6721	0	0	0	3.6785	3.3357	3.4842	4.3205	4.031	3.6048	3.8431	0	0	3.1036	3.1318	0
hsa-miR-6824-5p	1.10797	3.68655	0.000603369	-2.57858	5.97351	DOWN		3.7708	3.9134	5.0132	3.8708	3.2474	4.8277	4.0169	4.8096	3.959	0	3.1233	0	0	0	4.025	3.5835	0	0	0	0	3.1036	0	2.5836
hsa-miR-6837-3p	2.44844	0.288773	0.00220171	2.15967	4.46812	UP		0	3.1765	0	0	0	0	0	0	0	0	0	3.5715	3.8212	0	0	0	3.9267	0	4.3819	3.7381	3.326	3.5469	3.069
hsa-miR-6838-3p	0.259167	2.87468	0.000311207	-2.61552	6.12842	DOWN		3.6333	3.8394	4.1901	3.9448	3.1734	0	0	4.2888	3.8435	0	4.7082	0	0	0	0	0	0	0	0	3.11	0	0	0
hsa-miR-6843-3p	2.18365	4.2708	0.00274836	-2.08715	4.24908	DOWN		5.2183	4.3464	4.9491	4.0152	2.8323	4.4866	4.1238	4.1575	4.1654	4.7129	3.9713	3.5715	0	0	3.7355	0	0	0	4.4974	3.8985	3.326	3.4538	3.7211
hsa-miR-6853-5p	3.61213	0.959073	0.000284011	2.65306	6.29	UP		0	3.7614	0	3.2079	0	0	0	0	3.5805	0	0	4.2634	3.7142	3.9316	4.5198	4.709	4.0198	4.2151	4.4974	3.11	3.5187	0	2.8466
hsa-miR-6855-3p	1.45044	3.7744	0.00836381	-2.32396	5.00704	DOWN		4.2183	4.2919	5.0746	3.3233	3.0129	4.5797	0	3.5725	4.346	4.5974	4.5018	3.8711	0	0	6.61	0	0	3.3406	0	0	0	0	3.5836
hsa-miR-6861-5p	1.10708	3.72305	0.000498985	-2.61598	6.13039	DOWN		3.8964	4.4495	4.6596	4.2079	2.5104	4.7497	4.0169	4.6721	0	3.8198	3.9713	0	0	3.6097	2.8875	3.446	3.3417	0	0	0	0	0	0
hsa-miR-6871-3p	4.99393	4.36542	0.00236423	0.628515	1.54597	UP		4.3114	4.5915	5.0132	4.4303	3.3178	4.7497	3.9014	4.0871	4.5065	4.0999	5.0108	5.0004	4.7142	4.6097	5.4725	5.294	5.0198	4.8001	5.5519	5.2653	4.6061	5.1616	4.4316
hsa-miR-6894-5p	3.35888	1.34216	0.00520172	2.01672	4.04663	UP		0	3.5915	4.5771	0	0	0	0	0	0	3.4719	3.1233	4.515	3.3357	3.4842	4.5198	3.8245	3.6048	3.4561	0	2.9725	3.5187	3.3542	3.7211
hsa-miR-7109-3p	2.12786	0	0.0013575	2.12786	4.37068	UP		0	0	0	0	0	0	0	0	0	0	0	3.4561	3.7142	4.4842	0	3.446	0	0	0	0	3.4256	3.9392	3.069
hsa-miR-7112-3p	0	1.61887	0.00809046	-1.61887	3.07135	DOWN		0	3.5915	4.6596	0	2.5104	0	0	3.4656	3.5805	0	0	0	0	0	0	0	0	0	0	0	0	0	0
hsa-miR-7114-5p	2.44062	0.380918	0.00535996	2.05971	4.16902	UP		0	0	4.1901	0	0	0	0	0	0	0	0	3.778	0	4.1122	3.4725	4.1241	4.0198	3.563	0	0	0	2.8688	3.3491
hsa-miR-7150	4.33027	1.28802	1.96512e-05	3.04226	8.23779	UP		3.6333	0	4.5771	3.7104	2.2474	0	0	0	0	0	0	4.9586	4.7687	4.417	4.3729	4.8245	4.7747	4.148	4.6043	3.7381	3.7666	4.0063	3.5836
hsa-miR-758-3p	0	1.69294	0.00802839	-1.69294	3.23314	DOWN		0	3.3989	4.8819	0	2.7328	0	0	3.7652	3.8435	0	0	0	0	0	0	0	0	0	0	0	0	0	0
hsa-miR-769-5p	5.26088	5.89052	0.0008182	-0.629635	1.54717	DOWN		5.5968	5.7813	5.8819	5.8324	5.8562	5.9721	5.8083	6.2081	5.4285	6.5202	5.9099	5.1565	4.3357	5.154	5.6949	5.7965	5.5116	4.9256	5.6043	4.6048	5.326	5.7367	5.284
hsa-miR-7977	5.80508	6.84156	0.00177811	-1.03648	2.05122	DOWN		5.2656	6.8489	6.9974	7.6285	6.449	6.5105	5.9603	7.3426	6.8131	7.839	7.6023	6.6393	5.8718	5.4842	4.851	5.4816	6.2866	5.3704	5.4408	5.5086	5.4729	6.9478	6.306
hsa-miR-8078	4.90296	4.31586	0.00445986	0.587095	1.50222	UP		3.8964	4.1765	5.0132	4.0823	3.3178	4.4866	4.9603	3.8527	4.959	4.4048	4.3249	5.0806	5.0582	4.417	4.653	5.1241	5.3417	4.885	5.4974	4.5575	4.5631	5.0387	4.6192
hsa-miR-874-3p	4.75464	5.38825	0.00229191	-0.633613	1.55145	DOWN		4.7708	5.3194	6.1621	5.6453	5.0752	5.6672	5.0713	5.6478	5.6161	4.7129	5.5827	5.3305	5.1013	4.5483	4.775	5.4816	4.7202	4.148	4.7039	4.2356	5.0105	4.8323	4.1685
hsa-miR-888-5p	5.24198	4.21849	0.000217518	1.02348	2.03282	UP		4.3989	3.8394	4.6596	4.0823	3.3178	4.2802	4.2233	5.2246	3.5805	4.4719	4.3249	5.515	4.5988	5.1122	5.6317	5.709	5.5116	4.885	6.4117	4.6048	5.2466	5.3282	4.3491
hsa-miR-889-3p	3.7469	5.10763	0.0081515	-1.36073	2.56815	DOWN		4.2183	5.0509	5.297	4.8324	5.4646	5.5797	5.8083	6.731	4.0659	5.3344	3.8014	5.0806	3.9207	4.7252	0	4.6476	3.6048	3.563	4.2564	3.6506	3.1036	3.9392	4.4711
hsa-miR-92b-3p	9.70348	8.98749	0.00112776	0.715992	1.64261	UP		10.144	9.1595	9.1831	8.3576	8.978	7.9976	9.4611	8.955	9.1981	8.8069	8.6215	9.4083	9.3447	10.172	9.6263	9.6338	9.6491	10.18	9.3668	9.7721	10.157	9.3494	9.7823
hsa-miR-92b-5p	5.98937	4.73378	0.000210698	1.25558	2.38764	UP		5.866	5.3729	5.1901	4.5298	4.449	4.4866	6.0713	4.4656	3.718	3.5974	4.3249	5.3305	5.8212	6.3998	5.975	5.5835	5.6048	6.6137	6.1893	6.1584	6.7666	5.0387	6.3909
hsa-miR-935	4.49407	5.51995	0.000894394	-1.02588	2.0362	DOWN		4.8964	6.0344	6.3723	5.7928	4.1734	5.709	5.4039	6.1915	5.959	5.0999	5.0868	4.9155	4.4061	3.7252	4.653	5.5503	4.974	4.7557	4.797	3.2356	4.1625	4.6343	4.1196
hsa-miR-941	8.48038	7.38396	0.000262187	1.09641	2.13822	UP		7.5782	7.4495	7.4896	6.6563	7.3221	6.5105	7.5161	8.0367	6.959	8.5823	7.1233	9.0335	8.1787	7.6468	8.2166	8.6787	9.3927	8.0776	7.5652	8.3887	9.4714	8.4142	8.7004
hsa-miR-942-3p	6.51335	5.79702	1.26585e-06	0.716332	1.643	UP		6.2421	6.3989	5.8472	5.4303	5.6534	5.8277	5.3164	5.8096	5.8131	5.8198	5.6087	6.7291	6.5684	6.5793	6.3338	6.4095	6.6922	6.8537	6.3819	6.351	6.648	6.2748	6.3385
hsa-miR-95-5p	4.36392	2.26539	0.00106067	2.09853	4.28274	UP		4.0118	0	0	3.0823	3.449	0	0	3.5725	4.346	3.3344	3.1233	3.9586	4.3357	4.417	4.266	3.9314	4.4792	4.6626	5.2564	4.458	3.2191	4.1907	5.1924
hsa-miR-96-5p	5.84036	8.23146	7.14427e-06	-2.39111	5.24559	DOWN		9.8192	7.3464	9.0557	7.2154	8.6102	7.3346	8.5596	8.3044	8.3671	8.2556	7.6779	5.6525	4.4732	6.154	4.3729	6.294	5.6922	6.5239	5.4974	5.5086	6.148	5.1616	8.606
hsa-miR-99a-3p	2.63614	4.28325	0.00400941	-1.64711	3.13206	DOWN		4.3114	5.0178	4.7376	4.5771	3.9698	4.4866	4.4864	3.3502	4.6508	3.3344	4.1937	0	3.4732	0	3.266	3.8245	3.6048	3.4561	0	3.351	3.326	4.0704	3.2617
hsa-miR-99a-5p	6.10993	7.50615	0.0005317	-1.39622	2.63211	DOWN		7.1058	8.1072	7.1335	7.9312	7.5291	8.3413	8.3554	6.994	7.3775	6.8579	6.8348	5.4561	6.3714	4.1122	5.5198	7.6555	7.239	5.5886	5.2564	6.7902	6.6061	6.7757	5.9482

## Sheet: Suppl Tab 4
Supplementary Table 4. Two group comparison: differential serum miRNAs between patients with advanced HCC vs. Normal individuals (FC>1.32 UP or DOWN, p-value<0.01)
							SampleType	Normal	Normal	Normal	Normal	Normal	Normal	Normal	Normal	Normal	Normal	Normal	HCC	HCC	HCC	HCC	HCC	HCC	HCC	HCC	HCC	HCC	HCC	HCC
							SampleName	Jua-139-141	Jua-166-159	Jua-108-110	Jua-134-169	Jua-101-103	Jua-114-123	Jua-145-146	Jua-127-135	Jua-118-20	Jua-087-090	Jua-162-169	LG771	LG932	LG396	LG766	LG842	LG869	LG736	LG666	LG801	LG931	LG802	LG828
miRNA	Average log2 reads HCC_Advanced	Average log2 reads Healthy	p-value (t-test)	Difference	Fold change HCC_Advanced / Healthy
hsa-let-7a-3p	6.97849	8.02798	3.11482e-06	-1.04949	2.0698	DOWN		8.1281	8.3374	8.2929	7.2853	8.3928	7.7413	8.6816	7.6548	7.5232	7.8976	8.3728	6.778	7.3975	6.2535	7.3729	6.6787	7.0422	6.6012	7.0449	6.8794	6.9533	7.4234	7.3169
hsa-let-7a-5p	16.5188	17.2689	0.00126411	-0.750159	1.68198	DOWN		17.338	17.336	17.482	17.021	17.343	17.265	17.828	17.192	16.802	16.793	17.558	15.574	16.378	16.759	16.889	16.057	16.033	17.107	15.875	17.066	17.121	16.013	17.353
hsa-let-7d-3p	9.16225	8.73285	0.0010925	0.429405	1.34668	UP		8.5408	8.5812	8.796	8.7988	8.4807	8.9972	8.8255	8.9541	8.962	8.7711	8.3539	9.5095	9.1431	9.8951	9.2256	8.7425	8.9856	9.211	9.0162	8.9498	9.0885	8.823	9.3571
hsa-let-7e-5p	10.8995	11.878	8.16063e-06	-0.9785	1.97042	DOWN		11.99	11.793	12.111	11.46	12.287	11.811	12.456	11.149	11.743	11.735	12.123	10.151	11.779	11.36	11.143	11.01	11.171	10.782	10.532	10.741	10.665	10.716	10.744
hsa-let-7f-1-3p	5.0566	5.91476	2.08713e-06	-0.858164	1.81273	DOWN		5.8936	5.8628	6.3765	5.5691	6.339	5.5798	6.3256	5.7803	5.5148	5.545	6.2759	4.8711	5.3714	5.2726	5.238	4.9821	5.0642	5.0036	4.3819	4.8985	4.9449	5.2193	5.4316
hsa-let-7f-5p	15.9103	16.5754	0.000731625	-0.66503	1.5856	DOWN		16.659	16.613	16.635	15.924	16.815	16.38	17.295	16.504	16.345	16.241	16.918	15.513	15.942	15.759	16.204	15.437	15.621	16.029	15.254	16.176	16.41	15.815	16.764
hsa-let-7i-3p	2.82973	0.361182	0.000734909	2.46855	5.53488	UP		0	0	0	0	0	0	0	3.973	0	0	0	3.4561	0	4.1946	3.8875	3.8245	0	3.563	0	4.2945	3.5187	3.6343	3.5836
hsa-miR-101-5p	10.6725	9.45871	1.29225e-05	1.21375	2.3194	UP		9.6103	9.6939	9.5464	9.3764	9.4807	9.3149	9.5122	9.776	9.483	8.9761	9.2759	10.126	9.7919	11.654	10.792	10.404	10.211	11.554	11.322	10.898	10.279	9.7206	11.317
hsa-miR-105-5p	4.06355	0	2.51423e-08	4.06355	16.7205	UP		0	0	0	0	0	0	0	0	0	0	0	0	5.5684	3.8321	4.61	4.5835	4.8778	3.0776	5.5519	5.1742	3.5187	5.0063	2.9621
hsa-miR-106a-3p	3.14763	0.708355	0.00110944	2.43928	5.42371	UP		0	4.2439	0	0	0	0	0	0	3.548	0	0	3.193	3.4732	3.7252	4.3205	3.709	0	3.8431	4.4974	3.9725	3.6061	0	3.4316
hsa-miR-106b-3p	9.06823	7.75525	2.46735e-06	1.31298	2.48454	UP		7.8061	7.7033	7.0989	7.9841	7.5433	8.4194	7.8445	8.0027	8.3317	7.0415	7.5323	8.4372	8.4976	9.4718	8.8533	9.0489	9.0449	9.8191	8.4694	9.3836	10.048	8.5885	9.1565
hsa-miR-1181	4.36918	5.35753	0.000201656	-0.988352	1.98392	DOWN		4.6135	5.0215	5.142	5.8772	5.9853	5.5018	4.8445	5.3422	5.2585	5.8252	5.5211	4.3305	4.5988	4.6097	5.025	4.709	4.2677	4.2792	5.4408	4.4055	3.326	4.0063	3.4316
hsa-miR-1182	2.58262	0.337264	0.00309469	2.24535	4.74153	UP		0	0	0	0	0	0	0	3.7099	0	0	0	3.3305	0	3.3466	4.851	3.9314	3.8271	0	4.3819	0	3.6061	3.7168	0
hsa-miR-1202	2.10736	0	0.00127461	2.10736	4.30902	UP		0	0	0	0	0	0	0	0	0	0	0	0	3.9207	0	3.266	3.446	3.6048	3.2151	4.1189	0	0	3.7168	0
hsa-miR-1227-3p	1.56143	0	0.00479	1.56143	2.95147	UP		0	0	0	0	0	0	0	0	0	0	0	3.3305	3.3357	0	3.266	0	0	3.0776	0	0	0	3.0063	2.7211
hsa-miR-1233-3p	2.88287	0.338082	0.00063698	2.54478	5.83521	UP		0	0	0	0	0	0	3.7189	0	0	0	0	3.8711	4.0138	4.4842	3.4725	4.5164	0	4.563	0	3.11	0	3.1318	3.4316
hsa-miR-1236-5p	2.3052	0	0.000283023	2.3052	4.94236	UP		0	0	0	0	0	0	0	0	0	0	0	4.041	3.7142	0	3.4725	0	4.3417	3.0776	0	0	2.8406	3.0063	3.1685
hsa-miR-1238-3p	1.66913	0	0.00492715	1.66913	3.18023	UP		0	0	0	0	0	0	0	0	0	0	0	0	0	0	3.266	3.446	0	0	0	3.8205	3.1036	3.5469	2.8466
hsa-miR-1246	7.47693	6.21085	0.00928498	1.26607	2.40506	UP		6.639	5.8289	6.8094	6.7617	6.37	5.8865	5.2595	5.8474	6.374	6.5957	5.9473	10.161	10.324	7.1946	7.2238	7.6787	6.6922	6.6745	6.3205	7.358	7.5739	6.0704	6.4515
hsa-miR-1253	2.73188	0.408973	0.00171076	2.3229	5.00338	UP		0	0	0	4.4987	0	0	0	0	0	0	0	3.3305	3.4732	0	3.3729	4.294	3.9267	3.0776	4.6043	0	0	3.3542	3.3491
hsa-miR-1263	3.89809	0	1.41108e-08	3.89809	14.9088	UP		0	0	0	0	0	0	0	0	0	0	0	5.2287	4.8718	0	4.266	4.446	3.9267	3.0776	5.3819	3.458	4.2191	4.8323	3.069
hsa-miR-126-3p	16.4051	16.9565	0.0016862	-0.551372	1.46548	DOWN		16.958	16.994	16.996	16.711	17.284	16.691	17.384	16.701	16.752	16.836	17.214	16.157	17.194	16.081	16.811	16.282	16.223	16.547	17.234	16.161	15.823	16.206	16.142
hsa-miR-1275	3.32598	0	6.66352e-05	3.32597	10.0281	UP		0	0	0	0	0	0	0	0	0	0	0	4.3947	4.4061	3.6097	7.0494	3.709	0	3.6626	5.3205	3.8205	0	3.9392	0
hsa-miR-1276	3.71348	4.89046	0.00857404	-1.17699	2.26104	DOWN		4.9761	5.2945	5.142	5.3467	4.6228	4.3319	5.0144	4.6359	5.0428	4.545	4.843	5.1565	4.4732	4.6097	3.4725	0	3.8271	4.0036	4.6043	3.351	3.2191	4.1907	3.654
hsa-miR-1277-3p	4.54887	5.97298	3.02868e-05	-1.42412	2.6835	DOWN		6.1281	6.0513	6.0087	5.7003	6.0633	5.0323	6.5449	6.1429	5.5148	6.3227	6.1935	4.626	4.5988	4.1122	5.5656	3.446	4.974	4.3995	6.1189	3.8205	4.3766	5.0387	3.5096
hsa-miR-1277-5p	9.44332	10.5751	4.86121e-06	-1.13182	2.19135	DOWN		10.963	10.653	10.693	9.6925	10.788	9.954	11.305	10.357	10.612	10.745	10.564	9.8004	9.5818	9.3262	9.5471	9.1099	9.3641	9.0595	10.464	9.2186	8.6861	9.7168	9.4453
hsa-miR-128-3p	10.7857	10.3755	0.00144885	0.410121	1.3288	UP		10.157	10.354	10.032	10.243	10.271	10.73	10.705	10.462	10.624	10.046	10.507	10.679	10.276	11.237	10.678	10.603	11.018	11.243	10.76	10.533	10.755	10.956	10.69
hsa-miR-1284	2.81238	0.705227	0.00671192	2.10716	4.30841	UP		0	0	0	0	0	0	4.347	0	3.4105	0	0	0	0	3.6097	3.1505	3.9314	3.6048	3.6626	4.797	0	3.5187	4.4049	3.069
hsa-miR-1290	4.59109	1.87165	0.000658893	2.71944	6.58616	UP		4.5066	3.896	0	0	4.5158	0	3.5814	4.0884	0	0	0	6.3947	6.2992	3.7252	4.1505	4.5164	4.6048	4.0036	5.0449	4.4055	4.1036	4.1907	3.654
hsa-miR-1296-5p	2.05987	0	0.00141128	2.05988	4.1695	UP		0	0	0	0	0	0	0	0	0	0	0	3.3305	4.2617	3.6097	2.8875	0	3.3417	0	4.1189	0	0	0	3.1685
hsa-miR-1304-5p	5.37101	4.74839	0.00705873	0.622617	1.53967	UP		4.3911	4.6845	5.3765	5.4247	4.4004	4.1393	4.5074	4.2949	5.4105	5.3815	4.2215	6.0999	4.6577	5.3101	5.1803	5.879	5.9024	5.0036	4.7039	5.1742	5.326	5.4776	5.7374
hsa-miR-1307-3p	8.59202	8.07959	0.00359755	0.512426	1.42645	UP		8.1898	8.4309	8.1313	7.154	8.2583	8.4715	7.8742	7.9503	8.468	8.0952	7.852	9.1472	8.9356	8.8513	8.2764	7.9883	8.4207	8.0731	8.448	8.7565	8.7713	8.9794	8.4564
hsa-miR-130b-5p	3.6815	5.53415	0.00322082	-1.85265	3.61164	DOWN		5.8505	5.6065	6.7269	5.9841	5.339	5.2388	5.5814	4.6359	5.6121	4.8252	5.4753	4.9586	4.3357	3.9316	4.3729	5.031	4.6636	4.0776	0	0	4.6061	4.5469	3.654
hsa-miR-132-5p	2.41662	0	0.000235677	2.41663	5.33921	UP		0	0	0	0	0	0	0	0	0	0	0	3.5715	0	3.7252	0	3.9314	3.4792	0	4.1189	2.9725	0	3.3542	3.8466
hsa-miR-134-5p	7.21657	8.44691	0.00399792	-1.23033	2.34621	DOWN		9.4679	8.6654	9.1044	7.5691	8.7041	8.3708	7.7673	9.7717	6.9834	7.8462	8.6657	7.8935	6.782	8.3646	6.7254	7.1128	6.734	7.148	6.6796	7.2205	5.0733	8.2884	8.5768
hsa-miR-135a-3p	1.80464	0	0.00518504	1.80464	3.49342	UP		0	0	0	0	0	0	0	0	0	0	0	3.3305	3.4732	0	0	4.372	0	3.3406	0	0	0	4.0704	3.069
hsa-miR-138-2-3p	5.32646	5.97132	0.00267429	-0.64486	1.56359	DOWN		6.3911	6.2179	6.4121	6.306	6.1373	5.3763	5.617	5.7803	5.374	6.2295	5.843	5.515	5.8964	5.451	5.6317	5.6476	5.0642	4.8001	6.3205	4.7381	4.7281	5.2193	4.9055
hsa-miR-139-5p	6.13203	6.70202	0.00570347	-0.569985	1.48451	DOWN		6.0915	6.5658	6.2244	7.0594	6.9239	6.5798	7.2595	6.0319	7.1109	6.8462	7.0289	6.4103	6.5057	5.4842	6.4482	6.5835	6.0642	5.4281	6.9263	5.936	5.7855	5.9563	6.0561
hsa-miR-140-3p	11.5201	10.7276	9.75653e-06	0.792447	1.73201	UP		10.578	10.65	10.654	10.737	10.553	10.961	10.896	10.725	10.936	10.639	10.675	11.22	10.409	12.001	11.575	11.451	11.592	12.059	11.646	11.286	11.54	11.581	11.881
hsa-miR-142-3p	13.7432	14.9744	1.52297e-07	-1.2312	2.34762	DOWN		15.139	15.041	14.923	14.427	15.324	14.795	15.771	14.601	14.493	14.896	15.308	14.246	13.882	13.331	13.951	13.544	14.139	13.195	13.474	13.499	13.458	14.208	13.991
hsa-miR-148a-3p	13.897	13.4491	0.0009571	0.447909	1.36406	UP		13.368	13.479	13.371	13.847	13.169	13.647	13.24	13.581	13.183	13.882	13.173	13.614	13.747	14.04	13.862	14.132	14.406	13.707	13.617	14.059	13.673	14.354	13.553
hsa-miR-149-3p	5.92903	6.7503	8.91384e-05	-0.821275	1.76697	DOWN		7.0915	6.6654	6.6984	7.0347	6.7461	6.7913	6.1421	6.6918	6.5643	6.6919	7.1358	6.3305	6.553	6.1946	6.1803	5.879	6.3052	5.9455	6.2564	5.432	5.4729	5.8137	4.7852
hsa-miR-149-5p	4.0934	5.35378	1.30147e-06	-1.26038	2.39559	DOWN		5.6135	5.2439	5.6395	5.1768	5.4004	5.3319	4.9599	5.2949	5.374	5.3815	5.4753	3.8711	5.3357	3.9316	4.4725	4.372	3.4792	3.6626	4.9669	4.0429	3.326	3.9392	3.7211
hsa-miR-151b/151a-5p	8.07677	9.27136	1.03175e-09	-1.1946	2.28881	DOWN		9.3569	9.3038	9.3213	8.925	9.3853	9.0358	9.9123	8.8637	9.097	9.2999	9.484	7.9533	8.4104	7.8256	8.4725	7.7165	7.9856	8.1132	8.3744	7.9033	7.7475	8.1943	8.2246
hsa-miR-152-5p	4.12917	5.14869	0.000150447	-1.01952	2.02724	DOWN		5.45	5.137	5.8619	4.6362	5.4004	4.4194	4.7189	4.5579	5.4809	5.867	5.106	5.0806	4.7142	3.8321	3.9579	4.7679	3.6048	3.563	4.1189	4.11	3.2191	4.1907	4.3909
hsa-miR-16-2-3p	11.9636	12.5031	0.00757067	-0.539508	1.45348	DOWN		12.191	12.665	12.802	12.309	12.525	12.532	12.482	12.906	12.266	12.245	12.611	11.123	11.368	12.799	12.18	11.771	11.663	12.544	12.519	12.282	12.224	11.114	11.976
hsa-miR-17-3p	4.44578	1.82313	0.00304938	2.62266	6.15883	UP		0	3.7585	0	0	0	0	3.8445	4.2949	4.176	0	3.9805	4.2634	0	5.1122	4.3205	4.294	5.3773	5.0776	4.7039	4.4055	5.3516	3.4538	6.9896
hsa-miR-181d-5p	3.74363	5.05672	0.00460384	-1.31308	2.48472	DOWN		4.713	5.0215	5.0545	4.7617	5.1373	5.5018	4.9033	4.7099	4.7324	5.867	5.2215	3.6785	5.0138	3.4842	4.61	4.5164	4.7747	3.4561	0	3.8205	3.7666	4.6343	3.1685
hsa-miR-184	1.81917	0	0.00743689	1.81917	3.52877	UP		0	0	0	0	0	0	0	0	0	0	0	3.3305	3.7142	5.7252	2.8875	0	0	0	0	0	3.326	0	2.8466
hsa-miR-185-5p	12.7131	11.7628	0.000613126	0.950265	1.93223	UP		11.951	11.623	11.785	11.347	11.518	11.872	11.974	12.056	12.451	11.112	11.702	12.493	12.254	13.612	12.886	12.126	11.913	13.973	11.985	12.88	13.374	11.957	13.104
hsa-miR-186-5p	10.0824	9.58655	0.00926272	0.495871	1.41017	UP		9.8368	9.675	9.2591	9.5691	9.2583	9.8476	9.8482	9.8372	9.8468	8.8976	9.5763	9.5715	9.3038	10.533	10.234	9.7053	9.8093	10.856	10.114	10.442	10.291	9.5651	10.564
hsa-miR-188-3p	6.20941	5.62842	0.00558351	0.58099	1.49588	UP		5.8936	5.7585	5.3765	5.8206	5.9853	5.3763	5.3888	5.1429	4.9955	6.13	6.0446	6.9479	5.8212	6.2726	6.3338	6.5835	6.3596	5.3995	7.0449	5.8794	6.2191	6.086	5.5654
hsa-miR-188-5p	1.95069	0	0.00135593	1.95069	3.8656	UP		0	0	0	0	0	0	0	0	0	0	0	3.8711	0	3.6097	3.3729	3.446	0	0	0	0	2.8406	3.5469	2.7211
hsa-miR-18a-3p	2.51368	0	0.000227615	2.51368	5.71076	UP		0	0	0	0	0	0	0	0	0	0	0	3.5715	0	0	0	4.031	4.2677	4.0036	0	3.8985	3.6061	3.3542	3.4316
hsa-miR-1913	1.6399	0	0.00499813	1.6399	3.11644	UP		0	0	0	0	0	0	0	0	0	0	0	3.3305	0	0	3.025	3.446	3.9267	0	0	2.9725	2.9781	0	0
hsa-miR-191-5p	13.8656	13.0445	0.000381267	0.821038	1.76668	UP		12.976	12.876	12.479	13.004	12.745	13.619	13.583	12.834	13.31	12.758	13.306	13.535	13.031	12.878	13.953	14.06	14.436	14.146	13.55	13.694	14.383	14.594	14.127
hsa-miR-192-5p	11.9082	11.013	2.09447e-05	0.895167	1.85983	UP		10.892	10.738	10.619	10.986	11.015	10.91	10.926	11.735	11.455	11.049	10.818	11.984	12.437	11.626	11.588	11.867	11.214	12.465	11.619	12.699	12.185	11.56	11.654
hsa-miR-193a-3p	3.3272	0.438655	0.000200808	2.88855	7.40523	UP		0	0	0	0	0	0	0	0	0	4.8252	0	4.4561	4.0138	0	3.9579	4.294	4.8778	3.4561	4.2564	0	3.6061	3.3542	3.654
hsa-miR-194-5p	10.7098	10.0736	0.00186196	0.636193	1.55422	UP		10.253	9.8898	9.8424	10.075	9.8976	9.7519	9.9052	10.81	10.526	10.242	9.6165	10.987	11.232	11.162	10.283	10.558	9.7443	11.023	10.559	11.471	10.628	10.296	10.574
hsa-miR-195-5p	12.323	11.4205	6.63848e-05	0.902546	1.86936	UP		11.228	11.648	11.612	11.181	11.399	11.403	11.411	11.789	11.32	11.184	11.45	11.51	11.725	13.257	12.523	12.028	12.018	12.94	12.891	12.632	12.538	11.515	12.299
hsa-miR-197-3p	8.62903	9.17699	0.00173625	-0.547966	1.46202	DOWN		9.1984	9.1881	8.9674	9.712	9.1991	9.1711	9.0343	9.0533	9.0801	9.3302	9.0129	8.7629	8.6577	7.7042	8.6317	9.087	9.3948	8.1903	8.4905	8.2129	8.8361	9.1337	8.4465
hsa-miR-199a-5p	6.56753	7.53376	6.99019e-05	-0.96623	1.95373	DOWN		7.5066	7.3314	7.2043	7.4987	7.9343	7.2388	7.8293	7.486	7.4549	7.6566	7.7305	6.99	6.7687	6.3823	6.8875	6.4095	6.9024	5.9256	7.797	6.0936	5.4729	6.9306	6.2503
hsa-miR-199b-5p	6.69154	4.92779	0.00684169	1.76375	3.3958	UP		4.8061	5.2945	4.514	6.4247	0	6.2626	5.6858	5.4755	5.4809	5.4926	4.769	7.2974	5.2992	4.7252	6.8965	7.4904	8.263	6.4139	5.797	6.3371	7.1981	7.6396	6.9411
hsa-miR-203a-3p	6.00413	8.09756	9.22386e-08	-2.09343	4.26762	DOWN		8.9406	7.722	7.4468	9.3163	7.6609	7.1263	8.1112	9.1529	8.1493	7.9951	7.4518	6.2805	6.5057	5.7252	6.2238	6.6159	5.5434	5.2792	6.7743	5.3785	6.389	5.613	5.7211
hsa-miR-203b-5p	4.86952	6.24973	6.16504e-05	-1.38021	2.60306	DOWN		7.0541	5.722	5.514	7.4056	5.8598	5.4194	6.1175	7.3187	6.0659	6.3227	5.9473	5.2287	5.0138	4.0247	5.238	5.446	4.6636	4.563	6.0449	4.351	5.2191	4.7948	3.8466
hsa-miR-2054	2.71725	0.354173	0.000930985	2.36308	5.14467	UP		0	0	0	0	0	0	0	0	3.8959	0	0	3.6785	4.1837	4.1946	3.8135	4.2115	3.3417	3.2151	0	0	0	3.0063	2.9621
hsa-miR-205-5p	4.74329	5.85765	0.00105759	-1.11436	2.16499	DOWN		4.9761	5.9284	5.0545	6.9047	4.7223	6.3319	6.2819	6.1159	6.4461	5.6919	5.9805	5.193	4.0138	4.417	4.9918	5.5164	5.974	4.0036	4.2564	5.2052	5.1625	4.6762	3.5096
hsa-miR-208b-3p	4.324	5.24193	0.00135241	-0.917927	1.8894	DOWN		5.45	4.6065	5.6395	6.4247	4.5158	4.9758	4.5814	5.5579	5.6735	5.3227	4.9134	4.7291	4.9207	4.2726	4.851	4.709	4.974	3.3406	4.8844	3.9725	3.5187	4.1318	3.5836
hsa-miR-2110	6.66316	5.88805	0.00324611	0.775104	1.71131	UP		6.298	5.8289	6.4468	5.6362	4.6228	5.9169	5.9033	5.9116	6.1971	6.164	5.843	6.4257	6.4401	7.4341	6.9665	6.4639	5.9505	7.0955	5.655	5.8794	7.1625	6.9563	7.5284
hsa-miR-2114-3p	2.31831	0.325582	0.00400749	1.99273	3.97988	UP		0	0	0	0	0	0	3.5814	0	0	0	0	3.3305	0	4.0247	3.025	0	3.8271	3.6626	4.1189	0	0	3.2473	2.5836
hsa-miR-2115-3p	2.65534	0.356082	0.00321928	2.29926	4.92205	UP		0	0	0	0	0	3.9169	0	0	0	0	0	3.6785	0	0	3.1505	4.031	3.8271	3.9256	4.4974	0	0	4.4049	4.3491
hsa-miR-215-5p	9.52717	8.50065	1.47962e-05	1.02653	2.03712	UP		8.2324	8.4023	8.4724	8.3366	8.6546	8.2626	8.5122	9.1694	8.5398	8.8038	8.121	10.588	10.256	8.8858	9.1931	9.3979	9.0282	9.7372	9.363	10.028	9.6748	9.0685	9.1056
hsa-miR-216a-5p	3.40772	0.728127	0.00127869	2.6796	6.40677	UP		0	0	0	0	0	0	3.5814	0	0	0	4.428	0	3.9207	3.3466	3.5656	6.4279	4.0198	4.2792	0	4.351	3.5187	4.5011	2.9621
hsa-miR-218-2-3p	4.45937	5.198	0.000903772	-0.738633	1.66859	DOWN		4.713	5.7585	5.6395	5.4247	5.2077	4.5798	4.6518	5.0319	4.9466	6.0596	5.1649	4.626	4.7142	4.7796	4.6949	4.6476	4.8271	4.2151	5.1189	3.7381	4.3766	3.8688	3.9055
hsa-miR-222-3p	7.84403	8.40832	1.79367e-05	-0.564285	1.47865	DOWN		8.6005	8.2758	8.3306	8.306	8.4949	8.4663	8.7513	8.2584	8.0015	8.403	8.6032	8.233	8.2474	7.7594	8.025	7.372	8.0141	7.626	7.4694	7.7539	7.733	7.9647	7.9305
hsa-miR-24-2-5p	2.28993	0	0.000266413	2.28993	4.89033	UP		0	0	0	0	0	0	0	0	0	0	0	4.041	0	3.3466	0	3.8245	0	3.0776	0	3.11	2.8406	4.0704	3.1685
hsa-miR-24-3p	11.8589	12.3933	2.32271e-05	-0.534356	1.4483	DOWN		12.381	12.282	12.179	12.428	12.331	12.469	12.626	12.226	12.417	12.534	12.453	12.091	11.822	11.403	11.863	12.13	12.37	11.472	11.883	11.582	11.585	12.171	11.935
hsa-miR-25-3p	14.4341	13.2749	2.4063e-05	1.15917	2.2333	UP		13.136	13.303	13.017	13.279	12.811	13.823	13.452	13.588	13.746	12.694	13.175	13.793	13.509	15.187	14.42	14.091	14.151	15.617	14.089	14.708	15.001	13.932	14.711
hsa-miR-26a-2-3p	7.24557	8.53451	1.06924e-06	-1.28893	2.44347	DOWN		8.3911	8.6313	8.4724	8.4152	8.577	8.2267	8.9319	8.4702	8.16	8.6861	8.9177	6.9586	6.9563	5.8827	7.7944	7.243	7.4627	6.9941	8.3127	7.1505	7.4612	7.5803	7.1504
hsa-miR-28-3p	9.49824	9.07672	0.00318352	0.421523	1.33934	UP		8.9761	8.9123	8.9187	8.6197	8.8976	9.2478	9.4907	9.021	9.3577	9.2053	9.197	9.8398	9.7935	8.8608	9.6662	9.5078	9.7613	8.9455	9.6487	9.3649	9.412	9.9338	9.2446
hsa-miR-2909	3.12371	0.820664	0.00368104	2.30304	4.93498	UP		4.3911	0	0	4.6362	0	0	0	0	0	0	0	3.5715	0	3.6097	3.5656	4.1241	4.6048	3.0776	4.7039	0	3.2191	3.9392	3.069
hsa-miR-29b-1-5p	5.65981	2.76685	0.000212513	2.89296	7.42794	UP		0	4.4366	0	0	0	4.7242	3.9599	4.388	4.176	4.6446	4.106	5.0004	5.3357	5.417	6.2094	5.6476	5.4121	5.537	6.3205	6.2356	5.3766	5.4776	5.9482
hsa-miR-29b-2-5p	3.5043	0.776727	0.00023542	2.72757	6.6234	UP		0	0	4.755	0	0	0	0	0	3.789	0	0	3.5715	3.7142	3.9316	3.5656	0	3.4792	4.0776	4.4974	2.9725	3.9781	3.7168	4.5471
hsa-miR-302e	8.88473	10.1384	1.08268e-07	-1.25365	2.38444	DOWN		10.419	10.051	10.638	10.319	10.14	9.6057	9.6604	10.216	9.9985	10.521	9.9536	9.3057	8.9504	9.0526	8.6949	9.1464	8.8747	8.6353	9.8332	8.714	8.3735	8.7829	8.2532
hsa-miR-3064-3p	3.44318	0.371691	0.000509559	3.07149	8.40643	UP		0	0	0	0	0	0	0	0	4.0886	0	0	3.193	5.6577	0	4.4236	5.0783	4.1073	0	5.4408	4.8601	3.8406	4.7168	0
hsa-miR-3064-5p	3.35003	0.337264	4.52578e-05	3.01277	8.07112	UP		0	0	0	0	0	0	0	3.7099	0	0	0	4.041	4.2617	0	4.4725	5.0783	3.6048	3.563	0	3.458	3.6886	4.2473	3.7852
hsa-miR-30b-5p	6.91404	7.48198	0.00358965	-0.56794	1.48241	DOWN		7.45	7.5555	7.4296	7.4247	7.6098	7.4508	8.2079	7.763	7.5724	6.9076	6.9305	6.4103	6.3176	6.1946	7.3138	6.5335	6.9505	7.363	7.3668	6.908	7.0185	6.9815	7.6104
hsa-miR-30c-5p	9.29798	9.91112	0.000311862	-0.613143	1.52959	DOWN		9.9457	10.113	9.4339	9.4942	9.9524	10.029	10.503	9.8698	10.05	9.7461	9.8852	9.1402	8.5097	9.1566	9.6504	9.1353	9.5512	9.9845	9.3439	9.3614	8.9131	9.5734	9.256
hsa-miR-3127-5p	3.50266	0.420255	0.000121037	3.0824	8.47025	UP		0	0	0	0	4.6228	0	0	0	0	0	0	4.5715	4.968	5.2342	3.8135	0	4.3417	3.563	0	3.6506	3.911	4.1318	3.8466
hsa-miR-3135b	6.96902	8.16865	1.92374e-06	-1.19962	2.29679	DOWN		8.0635	8.0439	8.1098	7.8633	8.5569	7.4299	8.4979	8.2522	7.9712	8.6506	8.4159	7.6913	8.1787	6.8576	6.5314	6.9443	7.2292	6.6012	6.655	6.7902	6.4494	6.9306	6.7694
hsa-miR-3145-3p	3.10182	0.403464	0.00140412	2.69835	6.49061	UP		0	0	0	0	0	0	0	0	0	4.4381	0	0	3.7142	0	6.3338	3.9314	3.8271	3.3406	5.1189	3.2356	3.2191	4.5011	0
hsa-miR-3150b-3p	3.74013	1.56181	0.0073989	2.17832	4.52627	UP		0	0	4.514	0	0	4.0323	0	0	3.8959	4.7377	0	3.8711	3.4732	3.9316	3.7355	5.1685	4.3417	4.3995	0	3.458	4.3766	4.0063	4.1196
hsa-miR-3152-5p	5.66599	2.88903	0.000705558	2.77696	6.85409	UP		0	4.0215	5.2244	0	4.4004	4.2388	0	0	3.548	5.7377	4.6085	5.9372	5.8212	5.5483	5.6949	5.5164	5.6636	5.6137	7.1893	5.458	5.2191	5.4538	4.8764
hsa-miR-3154	3.30374	1.13359	0.00843524	2.17015	4.5007	UP		0	0	4.514	0	0	0	0	0	3.8959	4.0596	0	4.193	3.3357	3.4842	3.4725	4.5164	5.1897	0	0	3.5575	3.6886	4.3018	3.9055
hsa-miR-3163	2.51897	0	0.00027354	2.51897	5.73171	UP		0	0	0	0	0	0	0	0	0	0	0	0	0	0	3.266	4.2115	3.4792	3.8431	4.3819	3.351	4.5631	3.1318	0
hsa-miR-3168	5.49303	8.31094	0.00146232	-2.8179	7.05137	DOWN		5.1984	8.4973	9.2591	10.638	9.2163	7.6718	8.0539	5.0884	10.702	9.9593	7.1358	9.8935	6.968	6.0908	5.1202	4.1241	3.8271	5.148	5.8844	6.3088	4.9781	3.4538	4.1196
hsa-miR-3169	0.287167	3.74139	1.83296e-05	-3.45422	10.9604	DOWN		4.5066	4.9601	5.142	5.3467	0	3.7913	4.2595	0	3.8959	4.8252	4.428	0	0	0	0	3.446	0	0	0	0	0	0	0
hsa-miR-3183	3.42813	1.05719	0.00378069	2.37093	5.17276	UP		0	3.7585	0	0	0	0	0	0	3.6735	4.1971	0	4.119	4.2617	3.3466	4.0891	4.372	3.9267	0	5.3205	3.351	4.1036	4.2473	0
hsa-miR-3185	4.5175	5.99997	1.27517e-07	-1.48247	2.79427	DOWN		6.1637	5.722	6.264	6.6362	5.7696	5.8555	5.6518	5.5579	5.4809	6.5191	6.379	5.041	5.0138	5.0247	4.025	5.0783	4.7747	3.8431	4.7039	3.8985	3.911	4.6343	4.2617
hsa-miR-3201	1.82458	0	0.0050777	1.82457	3.54203	UP		0	0	0	0	0	0	0	0	0	0	0	3.6785	0	0	3.4725	0	4.4792	3.7557	0	0	0	3.2473	3.2617
hsa-miR-3202	2.00359	0	0.00790467	2.00359	4.00997	UP		0	0	0	0	0	0	0	0	0	0	0	3.8711	0	0	6.4844	0	3.7202	0	0	0	3.1036	3.7948	3.069
hsa-miR-325	0.92515	3.68166	0.00139163	-2.75651	6.75761	DOWN		5.1984	3.896	0	4.8772	4.9853	3.6538	0	4.1954	4.2585	4.8252	4.6085	4.119	4.2617	0	0	0	0	0	0	0	0	0	2.7211
hsa-miR-335-3p	5.52983	6.54675	0.000927291	-1.01691	2.02358	DOWN		6.561	6.8116	6.3399	6.1768	7.0052	6.2626	7.0924	6.4104	5.8959	6.545	6.9134	6.6655	5.7417	5.0691	5.7554	5.0783	6.1073	4.2151	6.7743	4.4055	5.1334	5.9219	5.4905
hsa-miR-335-5p	10.7226	11.3477	0.00576837	-0.625127	1.54235	DOWN		11.568	11.358	11.31	10.784	11.398	10.848	11.918	11.362	11.596	11.475	11.208	11.468	10.821	10.97	10.777	10.373	10.297	10.23	11.85	10.294	9.6402	11.06	10.891
hsa-miR-337-5p	3.49272	5.62584	0.00514916	-2.13311	4.38663	DOWN		5.3911	6.2945	6.264	5.0837	6.698	5.2388	5.2595	6.4755	4.2585	5.4926	5.428	5.2634	4.1837	5.1122	3.9579	0	0	4.2151	4.9669	4.2945	0	4.5913	5.3277
hsa-miR-339-5p	6.67307	7.36845	0.00295747	-0.69537	1.6193	DOWN		7.7719	7.3069	6.4468	7.0097	7.2417	8.0868	7.953	6.8637	7.789	7.2295	7.3539	7.119	6.2426	6.4341	6.7254	7.031	6.974	6.3103	6.1545	6.3921	6.911	7.7268	6.0561
hsa-miR-340-3p	3.27362	4.91623	0.00322747	-1.64261	3.1223	DOWN		5.1281	4.6845	5.3765	5.4247	4.7223	4.4194	5.5449	4.4755	4.3365	5.1971	4.769	3.5715	3.4732	3.3466	4.5198	0	4.2677	4.3406	0	4.1742	3.326	4.2473	4.0165
hsa-miR-34a-5p	7.56943	6.6021	0.00647534	0.967325	1.95521	UP		6.3297	6.7585	5.8619	6.7313	6.8598	6.1899	7.202	7.2828	7.1971	5.6446	6.5655	8.6525	9.0933	6.417	6.599	8.3432	6.8011	7.2395	6.4408	8.4188	7.2052	7.671	7.9517
hsa-miR-34c-5p	3.49387	1.05118	0.00110301	2.44269	5.43656	UP		0	0	0	4.4987	0	3.6538	0	0	3.4105	0	0	3.8711	3.8212	4.6097	4.5656	0	4.1073	3.0776	4.4974	3.6506	3.4256	3.7168	2.5836
hsa-miR-3615	8.45283	7.72288	0.00522706	0.729951	1.65858	UP		7.3139	7.9042	7.755	8.2429	7.0633	8.7455	7.2819	8.0533	7.6508	7.6919	7.249	8.54	8.2992	8.7007	8.1468	8.7351	9.2653	8.1651	6.8414	8.7927	8.733	8.9815	8.2332
hsa-miR-3618	2.68167	0	2.40715e-05	2.68167	6.41597	UP		0	0	0	0	0	0	0	0	0	0	0	3.4561	3.3357	0	3.1505	3.709	3.3417	3.6626	4.2564	0	0	4.0063	3.2617
hsa-miR-3621	1.67115	0	0.00517613	1.67115	3.18468	UP		0	0	0	0	0	0	0	0	0	0	0	0	4.1013	0	3.5656	3.446	0	0	0	3.11	0	2.8688	2.9621
hsa-miR-3648	3.37016	1.11379	0.00250424	2.25637	4.77787	UP		4.5066	0	0	0	0	0	0	0	3.548	4.1971	0	4.041	3.8212	0	3.266	4.2115	3.4792	3.6626	4.2564	3.6506	2.9781	4.3542	2.7211
hsa-miR-3656	5.3637	6.02945	0.00536199	-0.665745	1.58639	DOWN		6.0915	6.0215	6.8359	6.4987	6.1008	6.3543	5.2137	5.3422	5.9955	6.2613	5.6085	5.515	5.4061	6.154	4.4236	5.7388	4.6636	5.7099	5.9669	5.5086	5.3766	5.2473	4.654
hsa-miR-3667-5p	3.956	1.96917	0.00816798	1.98683	3.96364	UP		0	0	4.3765	5.2642	0	0	4.0668	3.8474	0	0	4.106	4.041	4.8212	4.417	3.5656	3.8245	4.0198	4.0036	4.8844	3.5575	3.4256	3.0063	3.9055
hsa-miR-3678-3p	3.81977	5.21265	0.00331085	-1.39288	2.62602	DOWN		4.8936	5.481	5.755	5.5691	5.2077	4.5798	5.5814	4.8474	3.9955	5.9076	5.5211	3.8711	4.7687	4.2726	3.8875	4.6476	4.1073	0	4.797	3.458	3.6061	4.4049	4.0165
hsa-miR-3682-5p	2.6073	0	0.000316505	2.6073	6.09362	UP		0	0	0	0	0	0	0	0	0	0	0	3.193	0	3.6097	4.266	3.709	4.4792	0	4.1189	0	0	2.8688	5.043
hsa-miR-3688-5p	1.67	0	0.00501642	1.67	3.18215	UP		0	0	0	0	0	0	0	0	0	0	0	3.9586	0	3.4842	3.4725	0	0	3.2151	0	0	2.8406	0	3.069
hsa-miR-3691-3p	3.44233	1.17301	0.00333822	2.26932	4.82097	UP		0	0	5.0545	0	0	0	0	0	3.789	4.0596	0	4.119	4.0138	3.3466	4.3729	3.446	4.0198	0	4.6043	3.351	2.9781	3.5469	3.5096
hsa-miR-3692-5p	5.11143	1.97805	0.000172373	3.13339	8.77493	UP		4.6135	3.896	4.514	0	0	0	4.2595	4.4755	0	0	0	6.0004	5.6577	5.2726	5.266	5.6159	3.7202	4.4561	5.1893	4.11	5.0733	5.5242	5.4515
hsa-miR-369-5p	5.70453	7.35013	4.78489e-05	-1.64559	3.12877	DOWN		8.0445	7.6939	7.6839	6.7003	7.6609	6.8397	6.7831	8.6072	6.133	7.2769	7.428	5.3947	5.7687	6.2145	5.0574	6.0783	5.5434	5.8431	6.6796	5.4835	3.6061	6.823	5.9621
hsa-miR-376a-3p	3.29023	5.84716	0.000850113	-2.55693	5.88454	DOWN		5.8061	6.137	5.6984	5.4247	6.4301	6.2861	5.4294	6.6359	5.2179	5.8252	5.428	4.041	0	5.1946	2.8875	0	3.6048	4.7099	4.2564	3.8205	0	5.7757	5.1924
hsa-miR-376c-3p	3.77582	5.40205	0.00169841	-1.62623	3.08705	DOWN		5.7603	5.7585	6.3765	5.6362	5.6228	4.0323	5.9319	5.8799	4.9955	4.7377	4.691	4.8253	3.5988	4.6097	3.8875	5.031	3.3417	3.9256	0	3.2356	3.5187	4.7168	4.6192
hsa-miR-377-3p	0	2.88484	0.000308509	-2.88484	7.38622	DOWN		5.3297	3.7585	4.9614	0	4.6228	0	4.1664	4.6359	4.2585	0	0	0	0	0	0	0	0	0	0	0	0	0	0
hsa-miR-378a-3p	8.42656	7.69162	1.46537e-06	0.73494	1.66433	UP		7.3453	7.6654	7.8094	7.4987	7.4448	7.9018	7.5814	7.9116	8.0311	7.9665	7.4518	8.6785	8.0472	8.7112	8.0127	8.5835	8.6528	8.2233	7.9669	8.6534	8.6582	8.4478	8.4832
hsa-miR-378c	6.63693	5.72025	1.18161e-06	0.916688	1.88778	UP		5.1984	5.7941	6.2244	6.131	5.5703	5.7913	5.7513	5.8799	5.761	5.4926	5.3284	7.289	5.8964	6.8951	6.4482	6.6159	6.9505	6.4422	6.4408	6.6048	6.5955	6.7853	6.6795
hsa-miR-378d	4.52876	1.61121	0.000240287	2.91755	7.55561	UP		0	0	0	0	0	3.6538	4.5814	0	4.8435	4.6446	0	5.1565	4.1013	4.7252	4.5198	4.446	4.3417	3.7557	4.1189	4.8985	4.7281	4.5913	4.9621
hsa-miR-378g	3.61622	1.3923	0.0034243	2.22392	4.6716	UP		4.1281	0	0	0	0	0	4.0668	3.7099	3.4105	0	0	4.3947	4.1837	3.7252	3.1505	4.2115	0	3.0776	4.8844	4.11	3.6886	4.2473	3.7211
hsa-miR-378h	2.6997	0.349364	0.000986571	2.35034	5.09943	UP		0	0	0	0	0	0	0	0	0	0	3.843	3.4561	0	3.6097	2.8875	5.031	3.7202	3.0776	0	0	3.6061	3.3542	3.654
hsa-miR-378i	4.17978	1.89045	0.00180729	2.28934	4.88832	UP		0	0	0	0	0	0	3.9599	3.973	4.3365	4.1971	4.3284	4.8711	4.4061	4.3466	3.3729	4.7679	4.0198	4.0036	4.4974	4.0429	3.8406	4.4049	3.5836
hsa-miR-379-5p	7.06798	8.82041	7.88617e-06	-1.75243	3.36925	DOWN		8.6263	9.4196	9.6948	8.3366	9.335	8.7328	8.6816	9.3596	7.6277	8.8566	8.3539	7.2974	6.6137	7.8827	6.1505	6.9944	7.0532	7.3995	6.9055	7.3785	5.2191	8.1799	7.7414
hsa-miR-381-3p	5.13324	6.22148	0.00208361	-1.08824	2.12615	DOWN		6.0541	6.7764	6.5781	5.8206	6.7461	6.6357	6.2819	6.5579	5.2179	6.2923	5.4753	5.363	5.1837	6.154	4.1505	4.1241	5.2677	4.2792	6.4117	4.936	3.7666	6.086	5.8764
hsa-miR-382-5p	8.83178	10.3701	0.000204402	-1.53833	2.90457	DOWN		11.075	10.477	10.833	9.6606	10.754	9.9037	9.723	11.705	9.0399	10.232	10.668	8.8935	8.6613	10.137	8.0614	8.4505	8.66	9.2615	8.7039	8.6164	6.885	9.8043	9.8466
hsa-miR-3915	5.64217	4.90961	0.00103659	0.732558	1.66158	UP		5.2656	5.524	5.0545	5.2642	5.339	4.9169	4.5074	4.388	4.2585	5.0596	4.428	6.2634	5.6577	5.7526	5.851	6.031	5.9267	5.8642	6.1189	5.2356	5.0422	5.2748	4.6879
hsa-miR-3923	3.66085	1.10558	0.000978193	2.55527	5.87777	UP		4.1281	3.896	0	0	4.1373	0	0	0	0	0	0	3.5715	0	3.8321	4.9579	3.709	3.6048	3.2151	4.797	3.458	4.1625	4.4538	4.1685
hsa-miR-3928-3p	4.01361	0	2.24976e-17	4.01361	16.1516	UP		0	0	0	0	0	0	0	0	0	0	0	3.8711	4.7142	3.4842	4.1505	4.8245	3.8271	4.148	4.1189	3.2356	3.2191	4.3542	4.2159
hsa-miR-3928-5p	2.97612	0.361864	0.000140413	2.61425	6.12306	UP		0	0	0	0	0	0	0	0	0	0	3.9805	4.119	0	0	4.025	3.8245	3.9267	3.0776	4.1189	2.9725	3.5187	3.5469	2.5836
hsa-miR-409-3p	8.37688	9.86963	0.000200547	-1.49275	2.81425	DOWN		10.415	10.242	10.412	8.8841	10.221	9.6982	9.4369	11.081	8.8131	9.5515	9.8111	8.4141	8.0691	9.2317	7.7102	8.5078	8.4502	8.9797	8.3894	8.3052	6.0578	9.4982	8.9091
hsa-miR-411-5p	5.82453	7.44814	0.000354062	-1.62361	3.08145	DOWN		7.376	8.231	8.4382	6.6686	7.9239	7.0461	7.4194	7.9272	5.9466	7.7035	7.249	6.2805	4.1837	6.6097	5.3469	6.1464	5.3417	6.5239	6.5519	5.8985	3.5187	7.1015	6.3909
hsa-miR-421	8.55025	7.66542	9.88439e-05	0.884832	1.84655	UP		7.5743	7.8203	7.4975	7.2212	7.3073	7.6982	7.8293	8.0815	8.1971	7.7264	7.3665	8.367	7.7349	9.3147	8.3338	8.2115	8.3327	9.4699	8.0731	8.6785	8.5493	8.2816	9.256
hsa-miR-425-3p	8.10816	7.62218	0.00123388	0.485976	1.40053	UP		8.0253	7.5346	7.5623	7.131	7.0633	8.1198	7.6432	7.5679	7.9278	7.5579	7.7109	7.8426	7.4976	8.5716	8.0931	8.0006	8.4751	8.291	8.2232	7.889	7.9616	8.3051	8.1474
hsa-miR-4306	5.96459	3.65781	0.000393093	2.30678	4.94778	UP		4.1281	4.4366	4.755	0	0	4.2388	4.4294	5.0319	5.176	4.1971	3.843	5.6785	5.6862	6.4677	5.9579	5.6787	5.3417	6.6626	5.8844	6.2356	6.4612	5.4776	6.043
hsa-miR-4307	2.53303	0.354182	0.00967794	2.17885	4.52793	UP		0	3.896	0	0	0	0	0	0	0	0	0	4.8711	0	3.6097	3.653	0	4.8778	0	4.1189	0	0	4.7948	4.4711
hsa-miR-431-5p	6.28087	7.78639	3.09214e-05	-1.50552	2.83928	DOWN		6.8722	8.2113	8.5937	7.2212	8.5019	7.9244	7.4883	8.2522	6.6735	8.2613	7.6503	6.704	5.4401	6.9316	5.4482	6.7965	6.678	6.2948	6.1893	6.28	4.8041	7.1243	6.6795
hsa-miR-4317	4.56075	0	6.18889e-18	4.56075	23.6006	UP		0	0	0	0	0	0	0	0	0	0	0	4.8711	4.8212	3.7252	4.61	4.709	4.974	3.7557	5.1189	4.2356	3.8406	5.3798	4.6879
hsa-miR-4325	5.29325	3.39499	0.00878857	1.89826	3.72763	UP		4.2656	5.0804	4.6395	0	0	4.9169	4.1664	4.9116	4.2585	0	5.106	4.515	4.4732	5.6097	5.7355	5.031	4.974	6.148	5.797	5.6279	5.5848	4.5913	5.4316
hsa-miR-432-5p	8.79633	10.3461	0.000169741	-1.54973	2.92762	DOWN		9.5875	11.003	11.198	10.122	11.009	10.547	9.9495	10.857	9.1787	10.308	10.047	8.8962	8.5256	9.9991	7.8602	8.6437	8.8871	9.2535	8.6235	8.9009	6.4959	9.8643	9.606
hsa-miR-4430	1.83563	0	0.00535822	1.83563	3.56926	UP		0	0	0	0	0	0	0	0	0	0	0	3.5715	3.4732	3.6097	3.4725	0	0	0	4.797	0	3.1036	0	0
hsa-miR-4433a-3p	5.74717	7.21496	0.00322327	-1.46779	2.76598	DOWN		7.1984	7.8289	7.4468	5.9316	7.5019	6.7069	7.1421	7.0319	7.0998	7.7264	7.7499	7.2374	8.1482	4.2726	6.9319	5.1241	4.4792	4.9256	7.1545	6.1263	5.9281	4.2473	4.3909
hsa-miR-4433b-5p	6.98157	8.68808	0.000538131	-1.70652	3.26372	DOWN		8.6263	9.0983	8.6544	7.8633	8.8098	8.2919	8.7831	8.3992	8.9403	9.046	9.0563	8.3057	9.3537	5.8827	8.1163	7.0899	5.5744	6.3995	7.895	7.4385	7.2935	5.0387	5.3909
hsa-miR-4435	1.92027	0	0.00468804	1.92027	3.78493	UP		0	0	0	0	0	0	0	0	0	0	0	3.9586	0	0	0	3.5835	0	4.0036	0	3.6506	3.8406	4.0063	0
hsa-miR-4440	5.77494	6.65927	0.00195023	-0.884331	1.84591	DOWN		7.3607	7.0948	6.7824	6.9581	6.2748	6.6173	5.9874	6.8799	5.9215	6.9471	6.428	5.8484	6.4061	5.8827	5.8875	5.7388	5.4792	4.6137	7.5249	5.4055	5.2466	5.7563	5.5096
hsa-miR-4493	1.68732	0	0.00496153	1.68732	3.22057	UP		0	0	0	0	0	0	0	0	0	0	0	0	3.8212	0	3.1505	3.8245	3.3417	0	0	0	2.9781	3.1318	0
hsa-miR-4500	6.19127	5.3009	0.0029192	0.890367	1.85365	UP		5.5066	5.0215	6.0545	5.0837	4.9029	5.2861	5.7831	5.8143	4.8435	4.3227	5.691	5.4561	5.9207	6.4842	6.8135	5.4816	5.0198	7.1566	6.4694	6.7799	6.7761	5.2748	6.6625
hsa-miR-4505	3.00281	0	8.73964e-07	3.00281	8.01559	UP		0	0	0	0	0	0	0	0	0	0	0	3.4561	3.7142	0	3.5656	4.031	3.9267	3.563	0	3.11	3.1036	4.3018	3.2617
hsa-miR-450b-3p	2.41601	0	0.0004485	2.41601	5.33692	UP		0	0	0	0	0	0	0	0	0	0	0	0	3.5988	0	3.1505	3.709	0	4.3995	5.4408	0	2.9781	2.8688	2.8466
hsa-miR-4510	11.0277	7.34451	1.40378e-15	3.68317	12.8453	UP		7.4786	7.481	7.6395	6.7617	7.4878	7.4612	7.4979	7.3767	6.9215	7.2923	7.3914	9.8851	11.204	10.858	11.51	10.882	10.785	11.6	10.949	11.385	11.66	10.381	11.233
hsa-miR-4511	2.15973	0	0.00149829	2.15973	4.46832	UP		0	0	0	0	0	0	0	0	0	0	0	0	0	3.6097	3.4725	0	3.3417	4.2151	4.797	0	3.5187	0	2.9621
hsa-miR-4516	7.13308	5.68544	0.000290476	1.44765	2.72763	UP		6.1984	5.524	5.142	6.3862	5.1373	6.7242	4.4294	5.8474	5.5804	5.6919	5.8786	6.5005	7.465	8.5639	6.1202	7.525	7.4792	7.4139	7.6425	7.3785	6.0265	8.0704	5.4114
hsa-miR-451b	8.93299	8.2367	0.00783237	0.696292	1.62033	UP		8.3453	8.1508	8.2929	7.9712	8.1283	8.7707	7.9033	8.5679	8.1054	8.2999	8.068	7.5077	7.553	9.3867	9.0911	8.9314	8.6672	9.3141	8.9159	9.7539	9.4059	8.8346	9.8344
hsa-miR-4523	2.1002	0	0.00133039	2.1002	4.28769	UP		0	0	0	0	0	0	0	0	0	0	0	3.193	4.1013	0	3.8135	0	4.0198	0	0	2.9725	3.5187	0	3.5836
hsa-miR-4532	8.38209	6.20394	3.67735e-07	2.17816	4.52574	UP		5.8505	6.0513	5.3025	6.4622	6.2077	6.2861	5.617	7.0604	6.5148	6.8462	6.0446	8.6092	9.5988	8.2915	8.1655	8.1685	8.5116	7.7613	8.7158	8.432	7.5355	10.026	6.7694
hsa-miR-4644	4.75326	2.73462	0.0069086	2.01864	4.05202	UP		0	4.2439	4.6395	0	0	0	4.0668	4.4755	3.9955	4.4381	4.2215	5.4257	4.5988	4.2726	5.0574	4.2115	5.4461	3.3406	5.7039	4.1742	3.9781	6.1762	4.654
hsa-miR-4650-5p	3.81275	0.337264	8.62586e-07	3.47549	11.1231	UP		0	0	0	0	0	0	0	3.7099	0	0	0	4.9586	4.1837	4.1946	3.3729	4.372	3.8271	3.3406	4.3819	0	4.7281	4.1318	4.2617
hsa-miR-4651	4.53765	5.15288	0.00702579	-0.615232	1.5318	DOWN		5.9761	4.7585	5.5781	5.8206	5.4004	5.0868	4.7831	4.4755	4.789	4.9076	5.106	4.8253	4.8212	3.9316	4.9579	4.8245	4.6636	5.3406	4.797	4.0429	4.4729	4.1907	3.5836
hsa-miR-4659b-3p	1.63605	0	0.00517192	1.63605	3.10814	UP		0	0	0	0	0	0	0	0	0	0	0	3.5715	4.0138	0	2.8875	0	0	3.0776	0	3.2356	0	0	2.8466
hsa-miR-4666b	5.07776	2.70655	0.00197161	2.37121	5.17376	UP		4.8936	0	5.2244	4.6362	0	3.6538	0	3.973	3.4105	0	3.9805	5.4561	4.4732	4.8321	5.5198	5.5164	6.0198	4.7099	5.4408	4.4055	3.6886	6.0547	4.8162
hsa-miR-4668-5p	4.49978	2.02957	0.00692822	2.47021	5.54125	UP		0	0	0	0	4.1373	4.5018	0	4.0884	4.3365	5.2613	0	5.9155	0	5.1122	4.61	4.294	5.5116	4.8431	4.1189	3.8205	4.6061	5.4776	5.6879
hsa-miR-4677-3p	2.62796	0.399191	0.00172753	2.22877	4.68733	UP		4.3911	0	0	0	0	0	0	0	0	0	0	3.3305	3.7142	0	2.8875	4.031	3.4792	3.6626	0	0	3.8406	2.8688	3.7211
hsa-miR-4677-5p	4.15913	4.717	0.00387632	-0.557867	1.47209	DOWN		4.5066	4.6065	4.3765	4.8772	5.7223	4.3319	4.8445	5.0319	3.9955	4.9856	4.6085	4.119	4.968	4.0247	4.266	4.031	4.1897	3.7557	4.4974	3.7381	3.7666	4.0063	4.5471
hsa-miR-4683	5.0437	6.50646	1.30963e-07	-1.46276	2.75636	DOWN		6.4208	6.646	7.0087	7.2642	6.4301	6.2388	5.6858	6.5975	6.0659	6.715	6.4983	5.119	5.1013	5.5483	5.3729	5.372	5.1897	4.0776	5.4974	4.351	5.0733	5.2748	4.5471
hsa-miR-4685-3p	3.40394	1.12215	0.00677519	2.2818	4.86283	UP		0	3.7585	0	0	0	0	0	3.8474	0	4.7377	0	5.2287	0	3.6097	5.0891	4.2115	4.4792	3.2151	0	3.458	3.5187	4.1907	3.8466
hsa-miR-4718	4.53858	6.09295	1.17418e-07	-1.55437	2.93706	DOWN		6.3607	5.8628	6.5464	6.131	6.5968	5.5018	5.9599	6.0604	5.6432	6.6684	5.691	4.7291	4.6577	4.417	4.6949	5.2115	4.4121	3.8431	5.3819	4.9725	3.7666	4.5913	3.7852
hsa-miR-4725-3p	5.11267	5.61262	0.00925264	-0.499943	1.41416	DOWN		5.561	5.3908	5.755	6.2642	5.6734	5.5018	4.7831	5.5975	5.5804	6.0231	5.6085	5.041	4.8212	5.1122	5.1505	5.031	4.974	4.0776	6.0824	5.2945	5.4013	5.0387	5.3277
hsa-miR-4726-3p	2.23312	4.27935	0.00619228	-2.04624	4.13028	DOWN		4.3911	4.3434	5.0545	6.0347	5.2077	3.6538	4.347	4.9116	0	4.9076	4.2215	3.193	0	3.3466	2.8875	3.5835	0	0	0	3.2356	3.5187	3.2473	3.7852
hsa-miR-4726-5p	3.14903	0.758336	0.0018357	2.3907	5.24411	UP		0	0	0	4.4987	0	0	0	0	0	0	3.843	4.041	3.5988	3.3466	3.025	4.2115	0	0	4.4974	3.7381	3.6886	4.1318	3.5096
hsa-miR-4729	3.07638	1.08447	0.00977521	1.9919	3.97761	UP		0	0	0	0	0	3.6538	0	3.8474	0	0	4.428	3.6785	3.3357	3.9316	4.2094	4.5164	3.7202	0	0	3.11	3.5187	3.6343	3.2617
hsa-miR-4732-3p	8.10814	6.97045	0.00206228	1.1377	2.20029	UP		6.8505	6.722	6.9372	6.9047	6.8815	7.3653	7.001	7.486	7.9528	5.545	7.0289	7.2548	7.1534	9.3466	8.2202	7.6939	7.84	9.5582	7.4552	8.5424	9.1571	6.7563	8.3196
hsa-miR-4734	2.95956	0.860509	0.00835326	2.09905	4.28427	UP		0	0	0	0	0	0	0	3.973	0	5.4926	0	3.9586	0	3.3466	3.4725	3.9314	3.4792	3.3406	5.0449	3.351	0	2.8688	2.7211
hsa-miR-4738-3p	2.7348	0	2.29341e-05	2.7348	6.65667	UP		0	0	0	0	0	0	0	0	0	0	0	4.119	4.0138	0	3.3729	0	3.9267	3.4561	0	3.6506	3.1036	3.4538	3.7211
hsa-miR-4739	3.56119	1.19334	0.00312088	2.36786	5.16173	UP		0	0	5.142	0	4.1373	0	0	3.8474	0	0	0	4.3947	5.0138	4.7252	3.4725	3.8245	3.9267	3.6626	0	3.351	3.1036	4.1907	3.069
hsa-miR-4745-5p	3.27305	0.783109	0.00210759	2.48994	5.61755	UP		0	0	0	0	0	0	0	0	3.789	4.8252	0	4.193	4.8212	0	3.3729	4.446	3.7202	3.563	4.6043	0	2.8406	4.5469	3.1685
hsa-miR-4748	5.01472	1.88453	9.65907e-05	3.1302	8.75555	UP		0	4.3434	4.3765	0	0	4.1393	0	0	3.6735	4.1971	0	4.119	4.1013	4.8827	4.775	5.1685	4.7747	4.6626	6.0064	5.6506	4.8762	5.3282	5.8315
hsa-miR-4772-3p	4.45422	1.80537	0.000508104	2.64884	6.27164	UP		0	0	4.3765	0	0	3.9169	4.0668	4.0884	3.4105	0	0	5.2287	3.5988	4.1122	4.025	5.7679	5.1073	3.4561	4.7039	4.2945	4.5631	3.3542	5.2389
hsa-miR-4779	2.36606	0	0.000259853	2.36606	5.15531	UP		0	0	0	0	0	0	0	0	0	0	0	3.778	0	0	3.4725	3.446	3.6048	0	4.4974	0	2.9781	3.5469	3.069
hsa-miR-485-3p	5.54602	7.13693	1.72562e-05	-1.59091	3.01239	DOWN		7.6765	7.5555	7.0087	6.3467	7.2248	6.8397	6.7987	8.5926	5.8435	6.8038	7.8157	5.7291	4.9207	6.6541	5.3985	5.6159	5.1491	5.9256	5.8414	5.1425	4.3766	6.3671	5.4316
hsa-miR-486-3p	15.0849	14.061	0.000278538	1.02392	2.03343	UP		13.856	13.958	14.397	13.802	13.803	14.252	13.824	14.499	14.6	13.56	14.12	14.712	14.749	15.812	15.246	14.737	14.611	15.958	13.962	15.775	15.943	14.074	15.44
hsa-miR-486-5p	16.6398	15.7598	0.00363769	0.880015	1.84039	UP		15.547	15.556	15.937	15.508	15.395	16.087	15.616	16.211	16.482	15.18	15.839	16.191	16.19	17.608	16.644	16.125	15.958	17.695	15.656	17.476	17.528	15.485	17.122
hsa-miR-493-3p	3.99589	5.71082	0.00101068	-1.71493	3.2828	DOWN		5.2656	6.0804	5.9125	5.7617	6.4593	6.0598	5.4689	5.5173	4.548	6.0952	5.6503	4.778	4.1013	5.0247	3.3729	0	4.4121	4.2151	4.6043	4.0429	3.2191	5.2748	4.9055
hsa-miR-493-5p	3.85356	5.86579	0.00319032	-2.01223	4.03406	DOWN		5.561	6.4366	6.6984	5.6362	6.8598	5.9169	5.9874	6.3422	4.2585	5.7821	5.0446	5.3947	4.2617	4.2726	4.0891	4.5835	5.2292	4.148	0	3.9725	0	5.3018	4.9896
hsa-miR-494-3p	4.21559	5.59632	0.00928672	-1.38073	2.60399	DOWN		5.3911	5.6845	6.3399	4.7617	5.7696	6.3092	5.4689	5.8799	4.789	5.7377	5.428	5.2974	3.3357	4.6097	3.3729	4.5835	0	4.2151	5.3819	4.4055	4.4729	5.6966	5.2159
hsa-miR-497-3p	3.90048	0.376091	2.29859e-06	3.52439	11.5066	UP		0	4.137	0	0	0	0	0	0	0	0	0	4.778	4.4061	4.417	4.266	4.7679	4.6048	3.3406	0	2.9725	4.7666	4.8323	3.654
hsa-miR-497-5p	4.64563	5.86518	7.00754e-08	-1.21955	2.32874	DOWN		5.9354	6.4138	5.6395	5.3467	5.9029	5.7913	6.2137	6.0027	5.6735	5.867	5.7305	4.5715	4.4061	4.8321	4.61	4.5835	3.8271	4.7557	5.1893	4.8205	4.4729	4.2473	5.4316
hsa-miR-5001-3p	3.88918	1.22996	0.000313257	2.65922	6.31691	UP		0	4.2439	0	0	0	0	0	0	4.548	4.7377	0	4.193	4.0138	4.0247	3.8135	4.031	4.0198	3.3406	4.2564	3.458	4.1036	4.2473	3.1685
hsa-miR-5009-5p	2.71218	0.365591	0.000937994	2.34658	5.08619	UP		0	4.0215	0	0	0	0	0	0	0	0	0	3.6785	0	3.4842	4.1505	4.031	3.3417	3.4561	0	0	3.6886	3.4538	3.2617
hsa-miR-500a-3p	5.14027	1.96267	0.000117702	3.17759	9.04797	UP		0	0	4.3765	4.4987	4.1373	0	3.5814	0	4.9955	0	0	5.363	4.1013	5.7796	5.1505	4.5835	5.1897	5.3995	4.7039	4.8985	5.5187	5.8507	5.1443
hsa-miR-5010-5p	5.14719	4.6394	0.009037	0.507792	1.42187	UP		4.2656	4.896	4.6395	4.6362	4.8154	4.2388	4.2595	4.5579	5.4105	4.9856	4.3284	4.4561	5.0582	5.6686	4.775	5.2115	5.3052	5.733	4.797	5.6048	5.541	4.3542	5.2617
hsa-miR-501-3p	6.33482	5.10083	1.91978e-07	1.23399	2.35217	UP		5.1281	5.3434	4.8619	5.4987	4.6228	5.7242	5.0144	5.388	5.374	4.8252	4.3284	5.9586	5.7952	6.9789	5.9579	6.1241	6.3948	6.9054	6.1189	6.4055	6.4494	6.4776	6.4515
hsa-miR-5091	2.01883	0	0.00134211	2.01883	4.05256	UP		0	0	0	0	0	0	0	0	0	0	0	3.3305	3.5988	0	3.025	3.5835	0	3.0776	4.2564	0	0	3.3542	0
hsa-miR-509-3p	2.43753	0.332164	0.00360893	2.10537	4.30308	UP		0	0	0	0	0	3.6538	0	0	0	0	0	3.3305	3.9207	0	3.025	3.8245	0	4.0776	0	0	3.2191	4.5913	3.2617
hsa-miR-5096	2.85214	0.413182	0.00164498	2.43896	5.42251	UP		0	0	0	0	0	0	0	0	0	4.545	0	3.9586	4.1837	0	3.266	3.709	4.1897	0	5.1893	3.351	0	2.8688	3.5096
hsa-miR-5100	2.64701	0	2.3815e-05	2.64701	6.26367	UP		0	0	0	0	0	0	0	0	0	0	0	3.778	0	3.7252	2.8875	3.8245	3.3417	0	0	3.458	3.326	3.3542	4.069
hsa-miR-510-3p	8.98571	6.70109	3.70752e-06	2.28462	4.87235	UP		7.1099	6.7033	5.514	7.8492	6.2077	7.1393	6.6345	6.5975	7.3174	5.6919	6.9473	8.6492	9.096	7.8256	8.8625	10.068	9.5056	9.5854	8.0258	9.6193	10.226	9.6116	6.7535
hsa-miR-512-5p	2.5803	0.310045	0.00244972	2.27025	4.82408	UP		0	0	0	0	0	0	0	0	3.4105	0	0	4.7291	3.4732	0	3.8135	3.446	3.9267	4.2151	4.2564	0	3.1036	0	0
hsa-miR-513b-3p	1.799	0	0.0058445	1.799	3.47979	UP		0	0	0	0	0	0	0	0	0	0	0	3.5715	0	0	2.8875	3.446	0	0	4.8844	3.8205	2.9781	0	0
hsa-miR-5189-5p	2.59567	0.422236	0.00225939	2.17344	4.51097	UP		0	0	0	0	0	0	0	0	0	4.6446	0	3.9586	0	3.4842	3.4725	3.446	3.7202	3.0776	0	0	3.4256	3.1318	3.4316
hsa-miR-532-5p	7.96802	7.03081	5.26175e-05	0.937216	1.91483	UP		6.9147	6.9601	6.6984	7.0837	6.5158	7.4612	7.3888	7.3069	7.7324	6.6684	6.6085	7.6193	7.2806	8.3734	8.2521	7.5917	7.5355	8.6953	7.4974	8.0642	8.5045	7.7118	8.4905
hsa-miR-548ar-5p	3.68972	0.333955	1.65364e-06	3.35576	10.2373	UP		0	0	0	0	0	0	0	0	3.6735	0	0	4.119	0	4.417	4.6949	4.031	3.7202	3.0776	4.3819	3.6506	2.8406	4.3542	4.9896
hsa-miR-548as-3p	3.86638	0.732236	4.41581e-05	3.13415	8.77955	UP		4.2656	0	0	0	0	0	0	0	3.789	0	0	4.4561	4.1837	4.5483	3.4725	4.031	5.0198	4.2792	0	3.7381	3.7666	4.2473	4.654
hsa-miR-548at-5p	2.14009	0	0.00138286	2.14009	4.4079	UP		0	0	0	0	0	0	0	0	0	0	0	3.9586	0	4.4842	3.266	0	3.3417	0	0	3.6506	3.911	0	3.069
hsa-miR-548au-5p/548c-5p/548o-5p/548am-5p	4.76133	5.35816	0.00343391	-0.596839	1.5124	DOWN		5.3911	5.722	4.755	6.0837	5.1373	5.5414	5.617	4.9116	4.6121	5.4381	5.7305	4.9155	4.0138	5.1122	4.7355	4.6476	4.6636	5.2151	4.6043	5.0429	4.1625	4.5913	5.4316
hsa-miR-548c-3p	2.27488	0	0.000273821	2.27488	4.83958	UP		0	0	0	0	0	0	0	0	0	0	0	3.193	0	3.7252	4.266	3.446	0	3.4561	0	3.6506	2.8406	0	2.7211
hsa-miR-548l	4.51305	1.99407	0.0011584	2.51898	5.73176	UP		0	4.137	4.755	0	0	0	4.7189	0	3.9955	0	4.3284	4.5715	4.1837	4.1946	4.5656	4.6476	5.1073	4.5106	4.9669	4.5575	4.4729	3.8688	4.5096
hsa-miR-550a-3p	3.24141	1.08022	0.00671516	2.16119	4.47284	UP		0	0	0	0	4.2748	0	0	0	3.4105	4.1971	0	3.3305	4.5988	3.8321	3.5656	0	0	4.148	4.6043	4.2945	3.1036	3.6343	3.7852
hsa-miR-551b-5p	2.53927	0.432273	0.00735221	2.10699	4.30793	UP		0	0	4.755	0	0	0	0	0	0	0	0	3.4561	3.5988	3.7252	3.3729	4.6476	4.1897	0	0	0	0	4.1318	3.3491
hsa-miR-552-3p	4.65097	1.50247	0.000130881	3.1485	8.86735	UP		0	4.3434	0	0	0	4.1393	0	3.8474	0	4.1971	0	4.8711	3.9207	3.8321	5.266	4.879	5.974	3.6626	5.9263	3.7381	3.2191	6.1318	4.3909
hsa-miR-566	4.10863	4.69819	0.00499985	-0.589566	1.50479	DOWN		4.6135	4.3434	5.8094	5.4247	4.6228	4.1393	4.4294	4.388	4.4809	4.7377	4.691	3.6785	3.9207	4.1946	4.1505	5.031	4.2677	3.8431	4.3819	4.0429	3.4256	4.4049	3.9621
hsa-miR-5692a	4.37802	5.45415	0.000372373	-1.07614	2.10838	DOWN		5.1984	5.4366	6.9125	6.3862	5.1373	4.5018	4.6518	5.9426	5.133	5.13	5.5655	4.119	4.1837	4.6097	4.3205	4.372	4.1897	5.148	5.2564	4.351	4.326	3.3542	4.306
hsa-miR-576-5p	7.12822	6.51549	0.00380815	0.612726	1.52915	UP		6.561	6.2945	6.264	6.5343	6.37	7.0868	6.7673	6.5975	6.8435	6.0231	6.3284	6.6785	6.2036	7.3556	7.0413	7.1575	7.6048	7.97	6.6043	7.3988	7.9365	6.5913	6.9964
hsa-miR-579-5p	4.23289	0.436918	2.08961e-08	3.79597	13.89	UP		4.8061	0	0	0	0	0	0	0	0	0	0	4.2634	3.5988	4.2726	4.653	4.031	4.1897	3.7557	4.9669	4.0429	4.5187	4.7168	3.7852
hsa-miR-584-3p	2.52347	0	0.000363977	2.52347	5.74962	UP		0	0	0	0	0	0	0	0	0	0	0	3.5715	0	3.3466	4.8875	0	4.1897	0	4.9669	3.11	0	3.2473	2.9621
hsa-miR-584-5p	9.99173	10.4942	0.00763457	-0.502493	1.41666	DOWN		10.899	10.158	10.548	9.6964	10.752	10.17	11.018	10.052	10.71	10.457	10.976	10.309	10.424	10.656	9.5768	9.5164	9.5915	9.6864	10.057	9.7086	10.384	10.135	9.856
hsa-miR-589-5p	5.79362	5.21755	0.00422518	0.576071	1.49078	UP		5.0541	4.524	4.9614	5.7617	4.5158	5.5798	5.2137	5.1429	5.3365	5.1971	6.106	6.0209	5.5057	6.3466	5.7944	5.372	5.4792	6.4971	5.4974	5.351	5.8406	5.7367	6.0818
hsa-miR-590-3p	7.56058	7.96484	0.00184978	-0.404253	1.3234	DOWN		8.298	8.0804	7.796	7.5862	7.8154	7.9392	8.4738	7.8879	7.6584	7.9275	8.1504	7.5853	7.2806	7.1946	7.5429	7.5419	7.8207	7.5822	8.0258	7.1663	7.648	7.9478	7.3909
hsa-miR-592	2.47172	0.3763	0.0051453	2.09542	4.27352	UP		0	0	0	0	0	4.1393	0	0	0	0	0	0	3.3357	0	3.9579	0	3.9267	0	4.797	3.5575	3.4256	3.0063	3.654
hsa-miR-607	2.27255	0.407355	0.00894383	1.8652	3.64317	UP		0	0	0	0	0	0	0	0	4.4809	0	0	0	0	4.0247	3.1505	3.5835	3.6048	0	0	3.6506	3.4256	3.2473	2.5836
hsa-miR-6071	2.49034	0.388618	0.00520561	2.10172	4.29222	UP		0	0	0	0	4.2748	0	0	0	0	0	0	3.9586	3.5988	0	0	3.709	3.4792	3.6626	4.4974	0	0	3.7168	3.2617
hsa-miR-6081	4.30866	2.17989	0.00980295	2.12877	4.37344	UP		0	0	4.514	0	0	3.6538	3.7189	0	3.6735	4.1971	4.2215	5.515	4.8718	4.1122	4.61	4.5164	4.7747	4.7557	0	3.7381	4.1036	5.2748	5.4316
hsa-miR-6085	2.01716	0	0.00129471	2.01716	4.04786	UP		0	0	0	0	0	0	0	0	0	0	0	3.3305	3.5988	0	3.4725	4.1241	3.4792	0	0	0	0	3.1318	3.069
hsa-miR-6126	7.62177	6.5653	0.00141411	1.05647	2.07983	UP		6.639	6.3908	6.3399	6.4622	6.4301	7.3206	5.9599	6.5579	7.0074	6.3227	6.7878	8.8282	7.2992	7.4426	6.3858	7.9506	7.4207	6.7891	6.9055	6.9635	7.541	9.1616	8.7734
hsa-miR-6128	4.12292	0	4.8016e-23	4.12292	17.4229	UP		0	0	0	0	0	0	0	0	0	0	0	4.119	4.1013	3.8321	4.3205	4.294	4.1073	4.148	4.6043	4.351	3.7666	4.2473	3.5836
hsa-miR-6129	6.02385	0.422236	1.25156e-11	5.60161	48.5572	UP		0	0	0	0	0	0	0	0	0	4.6446	0	5.626	6.2992	5.7796	6.4844	5.5164	5.9505	6.0225	6.5783	5.458	5.911	5.8137	6.8466
hsa-miR-6130	7.77341	4.13553	2.78408e-08	3.63788	12.4483	UP		5.0541	4.0215	4.514	0	4.9029	4.3319	4.7831	4.6359	3.789	4.545	4.9134	7.6193	8.1118	7.2631	8.2556	7.4095	7.9327	7.3406	8.0162	7.3017	7.8224	7.9605	8.2475
hsa-miR-6131	4.08472	1.53406	0.00239892	2.55066	5.85903	UP		0	0	0	0	4.1373	0	0	3.7099	4.3365	0	4.691	4.6785	0	5.0247	4.2094	4.446	4.5434	4.4561	5.1893	3.5575	4.2191	4.3018	4.3909
hsa-miR-6133	4.60882	1.50068	4.86751e-05	3.10813	8.62267	UP		0	0	4.6395	0	0	0	0	3.973	3.789	0	4.106	4.3947	4.8718	4.5483	4.5198	5.0783	4.2677	4.7557	5.1893	4.2945	4.1625	4.8323	4.3909
hsa-miR-6134	6.20573	6.89792	0.00085521	-0.692193	1.61574	DOWN		6.9559	7.2439	7.4808	6.8206	7.0249	6.5018	7.001	6.6548	6.176	6.715	7.3024	5.2634	6.2992	5.8061	6.9406	6.294	5.7747	6.0411	6.2888	6.5086	6.6167	5.9392	6.6963
hsa-miR-617	2.14467	0	0.00168606	2.14468	4.42193	UP		0	0	0	0	0	0	0	0	0	0	0	4.041	4.4061	0	0	0	0	0	4.797	2.9725	3.2191	3.4538	2.8466
hsa-miR-619-3p	4.13019	1.54222	0.000548394	2.58797	6.01253	UP		0	0	0	4.6362	4.1373	0	0	4.1954	3.9955	0	0	4.3305	4.1837	4.5483	4.3729	4.5835	4.3417	4.2792	4.7039	3.6506	3.9781	3.0063	3.5836
hsa-miR-629-3p	7.76387	6.63188	1.12807e-05	1.13198	2.1916	UP		6.0541	6.7403	7.3583	7.1075	6.5703	6.5414	5.9319	6.8474	6.4284	7.0952	6.2759	8.056	7.2992	8.8191	7.7204	7.8856	8.239	7.5695	7.1893	7.3371	7.184	7.7168	8.1504
hsa-miR-640	3.12173	0	6.83182e-07	3.12173	8.70433	UP		0	0	0	0	0	0	0	0	0	0	0	3.8711	3.5988	0	3.8135	3.5835	4.1897	0	4.2564	3.6506	3.5187	3.5469	3.4316
hsa-miR-6505-3p	3.92333	1.46618	0.00057121	2.45715	5.49131	UP		0	0	4.3765	0	0	0	3.8445	3.8474	0	4.0596	0	3.778	3.7142	3.3466	3.7355	4.031	4.1897	3.3406	4.797	4.0429	3.2191	4.3018	4.5836
hsa-miR-6508-3p	1.81299	0	0.00560587	1.81299	3.5137	UP		0	0	0	0	0	0	0	0	0	0	0	0	3.7142	0	3.8135	0	4.7747	0	0	3.2356	0	2.8688	3.3491
hsa-miR-6511a-3p	3.21009	0.728818	0.00137351	2.48127	5.5839	UP		0	4.0215	0	0	0	0	0	0	3.9955	0	0	3.4561	3.7142	0	3.8875	4.5164	0	3.3406	5.0449	3.2356	4.1036	3.0063	4.2159
hsa-miR-6512-5p	1.69598	0	0.00503863	1.69598	3.23996	UP		0	0	0	0	0	0	0	0	0	0	0	3.6785	3.4732	3.4842	3.653	0	3.4792	0	0	0	0	0	2.5836
hsa-miR-6515-5p	4.12393	0.822964	1.502e-05	3.30097	9.85578	UP		0	0	0	0	0	3.7913	0	0	0	5.2613	0	4.8711	4.8212	3.8321	5.3205	3.709	4.7747	3.563	5.1893	3.5575	2.8406	3.3542	3.654
hsa-miR-654-3p	5.24418	6.42852	0.00338772	-1.18433	2.27259	DOWN		6.1637	7.2047	6.5781	6.2642	7.173	7.0734	5.8445	7.4104	5.176	5.9471	5.8786	5.8018	4.1013	5.6686	4.025	5.4816	5.1897	5.0036	4.797	5.1742	3.9781	6.8778	6.8315
hsa-miR-660-5p	8.1159	7.39732	0.000176729	0.718582	1.64556	UP		7.2656	7.524	6.9372	7.4987	6.9447	7.7665	7.5356	7.8958	7.8435	7.13	7.0289	7.9848	7.2899	8.8061	8.025	7.9758	7.788	8.4316	7.9159	8.03	8.1876	8.3861	8.57
hsa-miR-664a-3p	4.71658	5.50811	0.00040224	-0.791526	1.7309	DOWN		5.713	5.7941	5.9125	5.1768	5.4593	4.7242	5.8742	5.9116	5.176	5.867	4.9805	4.9155	5.1837	3.7252	4.9231	5.031	5.2677	4.7099	4.8844	5.0082	3.9781	4.5011	4.4711
hsa-miR-664b-5p	4.59479	5.19395	0.00240733	-0.599154	1.51483	DOWN		5.8061	4.6845	4.9614	5.3467	5.5703	5.3763	5.1664	4.4755	4.9955	5.3227	5.428	4.626	5.5684	4.417	4.8135	3.709	4.8271	4.6626	4.8844	4.351	4.5187	4.4538	4.306
hsa-miR-6727-3p	3.40494	0.672045	8.83003e-05	2.7329	6.64789	UP		0	0	0	0	0	0	3.8445	0	3.548	0	0	3.9586	3.5988	3.3466	3.266	4.446	4.7747	3.4561	4.3819	3.458	3.1036	0	3.069
hsa-miR-6733-3p	3.50707	0.310045	1.418e-06	3.19703	9.17069	UP		0	0	0	0	0	0	0	0	3.4105	0	0	4.8253	4.1013	0	3.025	3.709	3.8271	3.7557	4.8844	3.7381	2.8406	3.8688	3.5096
hsa-miR-6739-5p	3.80668	1.29445	0.00785547	2.51223	5.70501	UP		0	0	0	4.9841	0	0	0	4.7099	0	4.545	0	5.4561	4.9207	0	3.7355	3.5835	5.0642	4.0036	5.1893	0	4.0422	5.1015	4.5836
hsa-miR-6747-3p	3.80612	1.25709	0.00228693	2.54903	5.85242	UP		0	0	4.8619	0	0	0	0	0	0	4.9856	3.9805	4.7291	4.1837	4.9316	4.2094	4.294	3.9267	3.3406	0	3.458	3.9781	4.1907	4.4316
hsa-miR-6750-5p	3.60404	1.52215	0.00841529	2.0819	4.23363	UP		4.1281	0	4.6395	0	0	0	0	0	3.9955	0	3.9805	4.3305	3.3357	4.8827	4.1505	3.8245	0	3.7557	4.7039	3.7381	3.5187	3.3542	3.654
hsa-miR-6752-3p	2.92818	0.803836	0.00496074	2.12435	4.36006	UP		0	3.7585	0	5.0837	0	0	0	0	0	0	0	3.193	3.5988	3.9316	3.266	0	4.2677	3.3406	0	2.9725	2.9781	4.0063	3.5836
hsa-miR-6754-3p	1.78706	0	0.00488624	1.78706	3.4511	UP		0	0	0	0	0	0	0	0	0	0	0	3.8711	3.4732	0	3.266	0	0	0	0	3.11	0	3.9392	3.7852
hsa-miR-6755-3p	1.78952	0	0.00536458	1.78952	3.45699	UP		0	0	0	0	0	0	0	0	0	0	0	0	0	3.4842	3.3729	3.9314	3.3417	0	4.4974	0	0	0	2.8466
hsa-miR-6763-3p	4.2237	4.8966	0.00606886	-0.6729	1.59427	DOWN		5.0541	4.524	5.142	5.5691	5.5158	4.6538	5.1664	4.2949	4.176	5.545	4.2215	4.7291	4.7142	4.0247	3.8875	3.709	4.6048	3.2151	4.3819	3.8985	4.0422	5.0063	4.4711
hsa-miR-6771-5p	3.0474	0.366573	0.000590079	2.68083	6.41224	UP		0	0	0	0	0	4.0323	0	0	0	0	0	3.778	0	3.9316	4.0891	4.446	4.0198	3.6626	4.7039	0	0	4.3542	3.5836
hsa-miR-6778-3p	2.71307	0.409691	0.00164608	2.30338	4.93614	UP		4.5066	0	0	0	0	0	0	0	0	0	0	4.119	3.3357	4.0247	3.266	0	3.9267	0	0	3.11	3.326	3.9392	3.5096
hsa-miR-6780a-3p	2.11649	0	0.00140171	2.11649	4.33638	UP		0	0	0	0	0	0	0	0	0	0	0	3.9586	0	3.6097	2.8875	0	4.3417	3.0776	0	0	0	3.8688	3.654
hsa-miR-6781-5p	3.79251	5.06135	0.00811498	-1.26885	2.40969	DOWN		5.3911	4.7585	6.264	5.8772	5.0633	3.9169	3.8445	5.0319	5.4809	5.4381	4.6085	4.778	4.4732	4.5483	3.7355	0	4.0198	4.0036	4.3819	4.0429	3.5187	3.9392	4.069
hsa-miR-6797-3p	2.31791	0.422236	0.00901651	1.89567	3.72095	UP		0	0	0	0	0	0	0	0	0	4.6446	0	3.5715	3.5988	0	0	0	3.7202	3.0776	0	3.5575	3.326	3.7948	3.1685
hsa-miR-6810-3p	2.29378	0.333955	0.00425857	1.95982	3.89014	UP		0	0	0	0	0	0	0	0	3.6735	0	0	4.041	0	3.3466	4.025	0	3.6048	0	0	2.9725	3.2191	3.3542	2.9621
hsa-miR-6812-5p	4.69637	5.47227	0.00136814	-0.775906	1.71227	DOWN		6.0156	4.896	6.0989	5.2642	5.9447	4.7913	5.3888	5.3422	5.3365	5.5957	5.5211	5.041	5.0582	5.3823	5.4236	4.9314	4.5434	4.563	4.8844	4.458	3.326	4.3542	4.3909
hsa-miR-6813-5p	3.59439	1.12622	0.00143644	2.46817	5.53343	UP		0	0	4.755	0	0	0	3.9599	0	3.6735	0	0	4.4561	4.0138	3.9316	5.0574	3.8245	3.7202	3.6626	0	2.9725	3.7666	4.0063	3.7211
hsa-miR-6819-3p	5.14679	6.08865	0.000224718	-0.941854	1.92099	DOWN		6.5066	6.0804	6.6395	6.131	6.4878	5.2861	5.8141	5.5975	6.0428	6.6203	5.769	5.4257	5.4401	5.3823	5.1505	5.4095	5.1491	4.563	6.3205	4.6506	5.1625	5.0387	4.069
hsa-miR-6826-5p	1.74002	0	0.00492468	1.74002	3.34039	UP		0	0	0	0	0	0	0	0	0	0	0	3.4561	0	0	4.025	0	0	3.0776	0	0	3.1036	3.6343	3.5836
hsa-miR-6827-3p	1.90851	0	0.00492867	1.90851	3.75421	UP		0	0	0	0	0	0	0	0	0	0	0	3.778	3.5988	0	3.5656	0	0	0	4.6043	0	0	3.6343	3.7211
hsa-miR-6830-3p	4.2435	0.807582	7.25894e-05	3.43592	10.8222	UP		0	0	0	0	0	4.2388	0	0	0	4.6446	0	6.2287	4.5374	3.9316	3.8135	4.8245	5.7477	4.0776	0	3.6506	4.326	5.2748	4.5096
hsa-miR-6831-5p	3.29089	0.392973	1.19535e-05	2.89792	7.4535	UP		0	0	0	0	0	0	0	0	0	4.3227	0	3.4561	4.1013	3.3466	4.2094	4.294	3.7202	3.4561	0	3.351	3.8406	2.8688	2.8466
hsa-miR-6832-5p	3.95617	0.371673	8.51508e-09	3.5845	11.9962	UP		0	0	0	0	0	0	0	4.0884	0	0	0	4.3305	4.0138	4.2726	3.8135	4.294	3.3417	4.0036	5.1189	3.351	3.2191	4.1318	3.5836
hsa-miR-6833-3p	3.27651	0.7669	0.0016382	2.50961	5.69466	UP		0	0	0	0	0	3.7913	0	0	0	4.6446	0	4.119	0	4.1946	3.3729	3.709	4.2677	3.2151	0	3.351	3.6061	4.9731	4.5096
hsa-miR-6837-3p	2.44844	0.430218	0.00811825	2.01822	4.05085	UP		0	0	0	0	0	0	0	0	4.7324	0	0	3.5715	3.8212	0	0	0	3.9267	0	4.3819	3.7381	3.326	3.5469	3.069
hsa-miR-6846-3p	4.51673	2.1152	0.00317998	2.40153	5.28364	UP		0	0	4.755	4.4987	0	0	0	4.5579	4.2585	5.1971	0	4.5715	4.0138	4.6686	5.8694	4.031	4.0198	4.6137	4.797	3.9725	4.4256	4.8688	4.3491
hsa-miR-6853-3p	2.1095	0	0.00145807	2.1095	4.31542	UP		0	0	0	0	0	0	0	0	0	0	0	3.3305	4.7687	0	3.5656	0	3.4792	0	0	3.7381	2.9781	3.4538	0
hsa-miR-6853-5p	3.61213	0.699264	7.00755e-05	2.91287	7.53115	UP		0	0	0	0	0	0	3.7189	3.973	0	0	0	4.2634	3.7142	3.9316	4.5198	4.709	4.0198	4.2151	4.4974	3.11	3.5187	0	2.8466
hsa-miR-6855-3p	1.45044	3.98335	0.00456999	-2.5329	5.78735	DOWN		4.5066	4.4366	5.3765	4.4987	4.1373	4.0323	3.5814	0	4.4809	4.4381	4.3284	3.8711	0	0	6.61	0	0	3.3406	0	0	0	0	3.5836
hsa-miR-6859-5p	6.60463	7.91885	9.64843e-08	-1.31421	2.48666	DOWN		8.146	7.9042	8.3213	8.4435	8.1008	7.5217	7.4979	7.7543	7.4895	8.3302	7.5979	7.2805	7.1327	6.8827	6.4725	6.5998	7.0532	6.2635	6.6796	6.0082	6.541	6.3798	5.9621
hsa-miR-6861-3p	5.10562	5.91592	3.63158e-05	-0.810301	1.75358	DOWN		5.8505	6.3434	6.0989	6.5343	6.2077	5.4194	5.2137	6.0319	5.298	6.13	5.9473	5.363	5.1431	5.4842	5.025	4.879	5.7747	4.885	5.1893	4.7799	4.7281	4.9731	5.043
hsa-miR-6862-3p	3.80644	1.1232	0.000722257	2.68324	6.42297	UP		4.5066	0	0	0	0	0	0	0	3.4105	4.4381	0	4.193	3.7142	4.1122	3.653	0	4.6048	3.8431	4.9669	3.6506	4.0422	4.5913	4.306
hsa-miR-6867-3p	2.25049	0	0.00026211	2.25049	4.75845	UP		0	0	0	0	0	0	0	0	0	0	0	3.4561	3.8212	0	3.025	0	4.1897	3.3406	0	2.9725	0	3.3542	2.8466
hsa-miR-6869-3p	1.90322	0	0.00483731	1.90323	3.74048	UP		0	0	0	0	0	0	0	0	0	0	0	4.193	3.9207	3.6097	0	4.1241	0	3.3406	0	3.6506	0	0	0
hsa-miR-6873-3p	4.32867	1.24628	0.000780351	3.08238	8.47013	UP		4.5066	0	0	0	0	0	0	4.2949	0	4.9076	0	6.0999	4.8718	4.1122	4.3729	4.031	5.1073	0	5.3205	3.6506	3.5187	6.2051	4.654
hsa-miR-6878-3p	2.26459	0	0.00137724	2.26459	4.80518	UP		0	0	0	0	0	0	0	0	0	0	0	4.041	0	4.1946	3.1505	3.446	4.4792	0	0	0	0	4.3542	3.5096
hsa-miR-6882-3p	4.74373	5.96057	8.4983e-06	-1.21685	2.32438	DOWN		5.9761	5.481	6.3765	6.7313	6.6483	5.9466	5.617	5.8799	5.4809	5.9076	5.5211	5.2634	5.1013	4.1946	5.1202	5.1685	4.6636	3.4561	5.1189	4.458	4.4729	5.2193	4.6879
hsa-miR-6883-3p	3.49219	1.11982	0.00187015	2.37237	5.17792	UP		0	0	0	0	0	3.7913	0	0	3.789	4.7377	0	4.2634	3.7142	3.6097	4.61	3.5835	4.1897	3.0776	0	3.6506	2.8406	4.4049	3.9621
hsa-miR-6883-5p	2.24213	0	0.00132466	2.24213	4.73093	UP		0	0	0	0	0	0	0	0	0	0	0	4.193	0	0	3.8875	3.9314	3.7202	0	4.3819	0	0	3.0063	3.7852
hsa-miR-6890-5p	4.77831	5.27315	0.00740451	-0.494846	1.40917	DOWN		4.9761	5.5658	5.142	5.7003	5.339	5.5414	4.5814	5.1429	5.4105	5.6919	4.9134	4.6785	5.7417	4.1946	4.653	5.1241	5.1897	4.2792	4.9669	4.8985	4.6886	4.4538	4.4711
hsa-miR-6892-3p	3.09237	0.413455	0.000239769	2.67891	6.40373	UP		0	0	0	0	0	0	0	0	4.548	0	0	3.9586	4.4732	3.6097	4.1505	3.446	4.5434	3.3406	0	3.351	3.1036	3.1318	0
hsa-miR-6894-5p	3.35888	1.2168	0.00566774	2.14208	4.41399	UP		0	4.137	0	0	4.4004	0	0	4.8474	0	0	0	4.515	3.3357	3.4842	4.5198	3.8245	3.6048	3.4561	0	2.9725	3.5187	3.3542	3.7211
hsa-miR-7107-5p	5.11498	6.01275	0.000347292	-0.89778	1.8632	DOWN		6.2324	6.3673	6.264	6.5691	6.0249	5.4612	4.9599	5.5579	6.2179	6.4101	6.0756	6.0609	6.0362	5.1122	5.2094	4.879	5.3417	5.2151	4.6043	4.2945	4.911	4.8688	4.8466
hsa-miR-7108-3p	4.99912	6.03169	2.11178e-05	-1.03257	2.04566	DOWN		6.2656	5.8289	6.142	6.3467	6.2417	5.7582	5.8445	5.2949	5.9712	6.5191	6.1358	5.3305	5.5988	5.3466	5.6317	5.294	4.8778	4.2151	4.797	5.2356	4.2191	5.2748	4.1685
hsa-miR-711	3.49863	1.21668	0.00373745	2.28195	4.86335	UP		0	0	0	0	0	0	0	0	3.9955	4.545	4.843	3.9586	3.9207	3.6097	3.5656	3.5835	4.4792	0	4.7039	3.458	3.326	3.8688	3.5096
hsa-miR-7-1-3p	3.6891	1.46118	0.00409215	2.22792	4.68457	UP		0	4.0215	0	0	0	0	3.5814	0	4.4105	4.0596	0	3.5715	0	3.7252	4.1505	4.1241	4.7202	3.7557	4.1189	4.0429	3.5187	4.0704	4.4711
hsa-miR-7160-5p	3.68872	1.23809	0.00957217	2.45063	5.46653	UP		4.6135	0	0	0	0	4.9169	0	0	4.0886	0	0	0	4.3357	6.2145	3.1505	4.7679	3.6048	5.778	5.3205	4.4055	3.8406	0	2.8466
hsa-miR-744-5p	9.36672	9.82062	0.00110097	-0.453902	1.36974	DOWN		9.704	9.7196	9.734	9.4435	9.7461	9.8417	10.278	9.5479	10.016	9.732	10.264	9.6977	9.8066	8.7763	9.5414	9.4838	9.7202	9.0318	9.1545	9.1364	9.372	9.3575	9.3224
hsa-miR-7-5p	10.1426	9.20813	0.00370885	0.934515	1.91125	UP		9.0776	9.2976	9.0145	9.0409	8.8707	9.0427	9.9087	9.8474	9.6866	8.345	9.1577	9.921	9.4609	10.703	10.51	9.04	8.8558	11.454	9.5485	11.12	10.82	9.6645	10.614
hsa-miR-769-3p	3.54704	1.51811	0.00969381	2.02893	4.08103	UP		0	0	0	4.6362	0	0	4.0668	0	3.6735	4.3227	0	4.8711	0	3.7252	3.266	4.294	3.3417	4.0036	4.3819	3.8205	4.1036	3.2473	3.5096
hsa-miR-7705	1.62242	0	0.00539803	1.62242	3.0789	UP		0	0	0	0	0	0	0	0	0	0	0	0	0	0	0	3.446	3.3417	0	4.1189	2.9725	0	3.0063	2.5836
hsa-miR-7847-3p	5.87582	5.05673	0.00103295	0.819089	1.76429	UP		5.561	5.2945	4.755	5.1768	4.6228	4.9758	4.8445	5.4755	5.2585	5.4381	4.2215	6.119	5.1013	6.7526	5.8875	6.2326	6.5434	6.4699	5.7039	5.8205	5.4494	5.6762	4.7535
hsa-miR-7848-3p	2.86773	0.356082	0.000729211	2.51165	5.70273	UP		0	0	0	0	0	3.9169	0	0	0	0	0	3.4561	4.6577	0	3.7355	3.709	3.6048	0	4.3819	3.458	3.2191	4.1907	0
hsa-miR-802	2.71036	0	0.000246634	2.71036	6.54484	UP		0	0	0	0	0	0	0	0	0	0	0	0	4.1013	0	4.025	3.446	4.1897	3.6626	0	3.8985	4.1625	5.0387	0
hsa-miR-8058	5.73822	7.37311	6.53216e-10	-1.63489	3.10564	DOWN		7.376	7.1508	7.9249	7.7003	7.2911	7.2977	6.8445	7.2949	7.374	7.4101	7.4399	5.9155	6.3714	6.154	5.4482	5.446	5.4121	6.3704	6.1545	5.3785	5.0733	5.5693	5.5654
hsa-miR-8085	2.04857	0	0.00133354	2.04857	4.13695	UP		0	0	0	0	0	0	0	0	0	0	0	3.193	3.3357	0	3.5656	0	0	3.3406	4.3819	0	3.2191	3.5469	0
hsa-miR-874-3p	4.75464	5.42812	0.00454136	-0.673477	1.59491	DOWN		5.713	5.8289	5.755	6.131	5.5703	5.7242	5.2137	4.7099	4.0886	5.5957	5.379	5.3305	5.1013	4.5483	4.775	5.4816	4.7202	4.148	4.7039	4.2356	5.0105	4.8323	4.1685
hsa-miR-889-3p	3.7469	5.03963	0.00508189	-1.29273	2.44991	DOWN		4.5066	4.896	5.2244	5.3467	5.5158	4.6538	4.6518	5.8474	5.0428	4.9076	4.843	5.0806	3.9207	4.7252	0	4.6476	3.6048	3.563	4.2564	3.6506	3.1036	3.9392	4.4711
hsa-miR-92a-1-5p	4.92078	6.02742	3.92851e-05	-1.10663	2.15343	DOWN		6.5066	6.2179	6.6091	6.3467	6.2748	4.6538	5.4294	5.7803	5.7324	6.6446	6.106	5.1565	5.5684	4.9316	5.2094	5.5503	4.7202	4.3406	4.3819	4.695	4.7666	5.2193	4.5096
hsa-miR-92a-3p	14.4121	13.8065	0.00360478	0.605629	1.52164	UP		13.521	13.7	13.697	13.842	13.471	14.386	13.756	14.028	14.077	13.549	13.844	14.206	13.965	15.278	14.128	14.098	14.199	15.062	13.529	14.794	15.085	13.895	14.706
hsa-miR-92b-3p	9.70348	9.04726	5.89362e-06	0.65622	1.57595	UP		8.8061	9.0439	9.1941	8.9383	9.02	9.4247	8.9248	9.1396	9.1247	8.8357	9.068	9.4083	9.3447	10.172	9.6263	9.6338	9.6491	10.18	9.3668	9.7721	10.157	9.3494	9.7823
hsa-miR-92b-5p	5.98937	5.30841	0.00205096	0.680958	1.6032	UP		5.561	4.4366	5.755	4.9841	5.339	5.2861	5.3888	5.1954	5.8435	5.3815	5.2215	5.3305	5.8212	6.3998	5.975	5.5835	5.6048	6.6137	6.1893	6.1584	6.7666	5.0387	6.3909
hsa-miR-93-5p	13.9766	13.3589	0.00161859	0.617674	1.5344	UP		13.386	13.349	13.226	13.085	13.08	13.448	13.73	13.591	13.719	12.963	13.371	13.457	13.295	14.079	14.209	13.664	13.707	15.075	13.927	14.186	14.49	13.415	14.215
hsa-miR-936	4.21115	1.97839	0.00400041	2.23276	4.70032	UP		4.1281	0	5.4468	0	0	3.7913	0	0	3.4105	4.9856	0	4.5715	4.5374	4.2726	4.4725	4.6476	4.7747	3.4561	4.8844	3.7381	3.326	4.0063	3.8466
hsa-miR-941	8.48038	7.00622	2.39736e-05	1.47416	2.77821	UP		7.0729	6.6654	6.2244	8.131	6.0633	8.1457	7.2253	6.4324	7.3554	6.545	7.2076	9.0335	8.1787	7.6468	8.2166	8.6787	9.3927	8.0776	7.5652	8.3887	9.4714	8.4142	8.7004
hsa-miR-942-5p	7.47845	7.00265	0.00366728	0.475805	1.39069	UP		6.9559	6.8459	6.8874	6.9841	6.7461	7.2861	7.1902	7.5378	7.0428	6.4926	7.0602	7.599	7.2233	7.9376	7.3271	7.2534	7.4627	8.1	6.9263	7.3988	7.8718	6.8137	7.8277
hsa-miR-95-5p	4.36392	1.9653	0.0018971	2.39862	5.273	UP		4.8061	0	4.6395	0	0	0	4.4294	3.8474	3.8959	0	0	3.9586	4.3357	4.417	4.266	3.9314	4.4792	4.6626	5.2564	4.458	3.2191	4.1907	5.1924
hsa-miR-98-3p	6.20404	7.016	3.55662e-05	-0.811958	1.75559	DOWN		7.0156	7.0365	7.4468	6.7915	7.1553	7.0043	7.4294	7.0174	6.4284	6.715	7.1358	5.599	6.2036	5.6394	7.1278	6.1014	5.9267	6.1132	6.1893	6.351	6.389	6.0387	6.7694
hsa-miR-98-5p	10.3003	11.2293	4.21257e-06	-0.928998	1.90395	DOWN		11.312	11.291	11.412	10.714	11.304	11.154	11.841	11.145	10.997	10.866	11.486	9.631	10.496	10.151	10.551	10.061	10.082	10.725	9.797	10.646	10.842	9.9413	10.68
hsa-miR-99b-3p	3.56524	0.906336	0.00280721	2.65891	6.31554	UP		0	0	0	0	4.9029	0	5.0668	0	0	0	0	4.3305	5.0138	3.3466	4.1505	4.5835	5.2292	0	0	3.458	3.911	4.4538	4.306
hsa-miR-99b-5p	8.42499	8.9931	0.00819524	-0.568108	1.48258	DOWN		8.9811	8.9001	8.6168	8.5862	9.3966	9.0868	9.4092	8.3538	9.3855	9.0686	9.1394	8.1703	9.0853	8.6901	8.6767	8.9346	9.1997	7.9845	8.2482	7.7167	7.6836	8.8711	7.8391

## Sheet: Suppl Tab 5
Supplementary Table 5. Two group comparison: differential serum miRNAs between patients with early HCC vs. Normal individuals (FC>1.31 UP or DOWN, p-value<0.01)
							SampleType	Normal	Normal	Normal	Normal	Normal	Normal	Normal	Normal	Normal	Normal	Normal	HCC_Early	HCC_Early	HCC_Early	HCC_Early	HCC_Early	HCC_Early	HCC_Early	HCC_Early	HCC_Early	HCC_Early	HCC_Early
							SampleName	Jua-139-141	Jua-166-159	Jua-108-110	Jua-134-169	Jua-101-103	Jua-114-123	Jua-145-146	Jua-127-135	Jua-118-120	Jua-087-090	Jua-162-169	Gra_S106	Gra-S75	Gra-S76	Gra-S101	Gra-S97	Gra-S105	Gra-S107	Gra-S102	Gra-S111	Gra-S108	Gra-S72
miRNA	Average log2 reads HCC_Early	Average log2 reads Healthy	p-value (t-test)	Difference	Fold change HCC_Early / Healthy
hsa-let-7a-3p	8.02798	6.81911	1.55859e-06	1.20887	2.31157	UP		8.1281	8.3374	8.2929	7.2853	8.3928	7.7413	8.6816	7.6548	7.5232	7.8976	8.3728	6.0928	6.7	6.899	7.1928	7.0444	6.0392	6.8083	6.8737	6.959	7.2509	7.1501
hsa-let-7a-5p	17.2689	16.2407	6.0512e-08	1.02818	2.03945	UP		17.338	17.336	17.482	17.021	17.343	17.265	17.828	17.192	16.802	16.793	17.558	16.901	16.174	15.921	16.201	16.388	15.915	16.232	16.094	16.251	16.238	16.333
hsa-let-7b-5p	16.5487	15.9246	0.00205538	0.624091	1.54124	UP		16.55	16.453	16.66	16.54	16.41	16.759	16.837	16.748	16.535	15.831	16.713	17.237	16.102	15.99	15.234	15.729	15.848	16.202	15.662	15.654	15.995	15.518
hsa-let-7c-5p	12.1004	11.0062	9.35399e-08	1.09418	2.13492	UP		12.055	12.192	12.325	11.875	12.199	11.997	12.408	12.165	11.764	11.8	12.324	11.774	11.019	11.134	10.418	10.89	10.793	11.523	10.613	11.167	10.967	10.77
hsa-let-7d-5p	12.8923	12.2099	1.27227e-06	0.682364	1.60477	UP		12.925	12.853	13.105	12.583	12.828	12.792	13.124	13.189	12.745	12.593	13.078	12.91	12.324	12.07	12.051	12.287	12.063	12.114	12.139	12.004	12.064	12.283
hsa-let-7e-5p	11.878	10.4964	1.4771e-07	1.38165	2.60565	UP		11.99	11.793	12.111	11.46	12.287	11.811	12.456	11.149	11.743	11.735	12.123	10.255	9.8179	10.578	10.54	10.94	10.066	10.295	10.646	10.862	10.104	11.356
hsa-let-7f-2-3p	0	1.83311	0.00283047	-1.83311	3.56304	DOWN		0	0	0	0	0	0	0	0	0	0	0	0	3.0509	0	3.2079	2.6259	0	0	3.7652	0	3.7129	3.8014
hsa-let-7f-5p	16.5754	15.3423	1.06349e-06	1.23309	2.3507	UP		16.659	16.613	16.635	15.924	16.815	16.38	17.295	16.504	16.345	16.241	16.918	15.036	15.758	15.009	15.902	15.938	14.785	14.618	15.55	15.061	15.347	15.761
hsa-let-7g-3p	0.344664	3.15362	0.000158796	-2.80895	7.00777	DOWN		0	0	0	0	0	3.7913	0	0	0	0	0	0	3.679	5.0746	3.0823	3.2474	4.0392	0	4.2246	3.959	3.3344	4.0493
hsa-let-7i-3p	0.361182	3.60829	0.000108799	-3.24711	9.49461	DOWN		0	0	0	0	0	0	0	3.973	0	0	0	6.0928	4.6359	0	4.2079	4.3178	3.9017	4.7759	4.1575	0	3.7129	3.8888
hsa-miR-100-5p	5.92015	7.11213	0.000674771	-1.19198	2.28466	DOWN		5.8061	6.0513	5.9125	6.0837	5.9447	6.4612	5.9319	5.973	5.6432	5.9856	5.3284	5.5209	7.8907	6.8647	8.0407	7.6014	8.006	8.0846	6.273	7.3671	5.6849	6.8994
hsa-miR-103a-3p	13.1154	13.5148	0.00548003	-0.399455	1.31901	DOWN		13.289	13.092	13.104	12.573	13.108	12.924	13.709	13.123	13.075	12.886	13.386	14.166	13.431	13.358	13.543	13.801	13.048	13.299	13.391	13.228	13.724	13.674
hsa-miR-103b	11.7101	12.1929	0.000596626	-0.482818	1.39747	DOWN		11.901	11.745	11.829	11.13	11.855	11.417	12.219	11.707	11.498	11.541	11.969	12.344	12.098	12.338	12.2	12.315	11.596	12.049	12.061	12.134	12.55	12.437
hsa-miR-105-5p	0	2.82928	5.93759e-05	-2.82928	7.1072	DOWN		0	0	0	0	0	0	0	0	0	0	0	0	3.8394	4.7376	0	3.3178	4.1647	3.7759	0	3.8435	3.4719	3.9713
hsa-miR-106a-3p	0.708355	2.93245	0.00751809	-2.2241	4.67219	DOWN		0	4.2439	0	0	0	0	0	0	3.548	0	0	4.3114	0	4.0746	4.3233	3.5104	0	3.9014	4.1575	4.5065	3.4719	0
hsa-miR-106b-3p	7.75525	9.8857	2.83132e-09	-2.13045	4.37853	DOWN		7.8061	7.7033	7.0989	7.9841	7.5433	8.4194	7.8445	8.0027	8.3317	7.0415	7.5323	11.119	10.078	10.294	9.451	9.9956	9.3313	10.287	9.2966	9.6401	9.7905	9.4596
hsa-miR-107	11.2843	11.6777	0.00306607	-0.393455	1.31353	DOWN		11.467	11.224	11.234	10.729	11.38	11.117	11.804	11.304	11.297	11.099	11.472	12.267	11.668	11.605	11.768	11.809	11.178	11.523	11.447	11.524	11.84	11.826
hsa-miR-1185-2-3p	0	4.18064	3.15565e-18	-4.18064	18.1341	DOWN		0	0	0	0	0	0	0	0	0	0	0	3.8964	4.679	4.1901	4.8708	3.2474	4.3871	3.9014	3.9351	4.2585	4.0125	4.6087
hsa-miR-1199-3p	0	3.33729	3.86045e-06	-3.33729	10.1071	DOWN		0	0	0	0	0	0	0	0	0	0	0	0	3.9134	4.7376	3.9448	2.5104	4.6672	0	4.3502	4.4285	3.7129	4.4452
hsa-miR-1233-3p	0.338082	2.38578	0.00745217	-2.0477	4.13446	DOWN		0	0	0	0	0	0	3.7189	0	0	0	0	0	0	4.8116	2.9448	2.8323	4.4866	4.3164	3.4656	0	0	3.3863
hsa-miR-1237-5p	5.82634	5.11801	0.00722848	0.708327	1.63391	UP		5.561	5.8628	6.3399	6.603	5.7223	4.9758	5.3888	5.9116	5.4105	6.545	5.769	4.9553	4.3464	5.8819	4.9448	3.7834	5.3871	5.4039	5.3799	5.3029	5.6849	5.2276
hsa-miR-1238-5p	1.61916	4.13909	0.00555017	-2.51993	5.73553	DOWN		0	0	5.2244	0	0	0	0	4.1954	4.548	0	3.843	4.6333	4.1765	5.3476	4.5298	3.6803	5.1033	0	4.6232	4.346	4.3344	4.7556
hsa-miR-1252-5p	0.7041	2.98831	0.00714138	-2.28421	4.87097	DOWN		0	0	0	0	0	0	0	0	3.548	4.1971	0	0	4.2919	5.3965	3.6229	3.6803	3.9017	0	4.2888	3.718	0	3.9713
hsa-miR-1253	0.408973	4.0399	1.49335e-07	-3.63093	12.3885	DOWN		0	0	0	4.4987	0	0	0	0	0	0	0	4.4813	3.8394	5.534	3.3233	3.0129	4.9017	3.9014	4.0871	3.8435	3.7129	3.8014
hsa-miR-125a-5p	11.0207	10.4047	0.00215341	0.616036	1.53266	UP		10.715	10.893	10.257	11.337	11.248	11.386	11.37	10.683	11.39	10.75	11.199	10.819	9.7936	9.534	10.54	10.998	10.144	10.493	10.586	10.404	10.374	10.766
hsa-miR-1260b	6.12751	6.69266	0.00804026	-0.565155	1.47955	DOWN		5.9761	6.2439	5.8619	6.3862	6.3073	6.398	6.5263	5.6734	6.0428	5.7377	6.249	5.2656	6.4495	6.512	7.2079	6.9534	6.4377	6.6563	7.2809	6.6848	7.2509	6.9203
hsa-miR-1261	0	1.85972	0.00928955	-1.85972	3.62937	DOWN		0	0	0	0	0	0	0	0	0	0	0	3.7708	4.2354	4.3965	0	0	0	0	0	4.1654	0	3.8888
hsa-miR-1262	1.82709	4.84203	0.000395364	-3.01494	8.08326	DOWN		0	3.896	0	0	0	0	3.5814	0	3.9955	4.6446	3.9805	4.1188	5.2919	6.512	5.1148	3.6259	4.7497	5.1238	6.032	5.6508	3.3344	3.7082
hsa-miR-1263	0	2.3871	0.00284479	-2.3871	5.23105	DOWN		0	0	0	0	0	0	0	0	0	0	0	0	3.9838	4.297	0	3.8323	4.8277	0	0	5.4285	0	3.8888
hsa-miR-126-3p	16.9565	15.7684	5.25992e-08	1.18809	2.27851	UP		16.958	16.994	16.996	16.711	17.284	16.691	17.384	16.701	16.752	16.836	17.214	15.333	15.53	15.071	16.442	16.046	15.907	15.4	15.821	15.969	15.826	16.107
hsa-miR-126-5p	13.7887	12.6284	3.30087e-08	1.16036	2.23514	UP		13.901	13.869	13.802	13.531	14.036	13.567	14.236	13.624	13.689	13.6	13.821	12.663	12.449	11.701	12.965	12.775	12.812	12.321	12.443	12.928	12.783	13.072
hsa-miR-1269b	0	2.1702	0.00283695	-2.1702	4.50086	DOWN		0	0	0	0	0	0	0	0	0	0	0	3.6333	4.2354	4.7376	3.0823	0	0	0	4.2246	3.959	0	0
hsa-miR-1273f	0	1.60199	0.00996141	-1.60199	3.03562	DOWN		0	0	0	0	0	0	0	0	0	0	0	3.6333	0	4.0746	0	2.7328	0	0	3.5725	0	0	3.6087
hsa-miR-127-3p	5.19982	6.95917	0.000280066	-1.75935	3.38547	DOWN		5.2656	5.3908	6.0989	4.4987	5.5703	4.7913	3.9599	5.5975	4.789	5.545	5.691	5.4407	6.5688	7.2311	7.1621	7.9942	7.1647	8.1238	8.3312	4.959	7.9666	5.6087
hsa-miR-1275	0	1.58771	0.00993895	-1.58771	3.00572	DOWN		0	0	0	0	0	0	0	0	0	0	0	0	3.1765	4.297	3.4303	3.0954	0	0	3.4656	0	0	0
hsa-miR-1277-5p	10.5751	9.70046	0.00155367	0.874673	1.83359	UP		10.963	10.653	10.693	9.6925	10.788	9.954	11.305	10.357	10.612	10.745	10.564	8.516	9.117	8.8295	10.173	9.8789	9.8395	9.5186	9.994	9.8696	10.224	10.745
hsa-miR-1284	0.705227	4.3767	1.02201e-06	-3.67147	12.7416	DOWN		0	0	0	0	0	0	4.347	0	3.4105	0	0	3.6333	4.801	5.3965	2.9448	3.5693	4.6672	4.7088	4.0131	5.4285	4.536	4.4452
hsa-miR-1290	1.87165	5.14126	0.00010508	-3.26961	9.64385	DOWN		4.5066	3.896	0	0	4.5158	0	3.5814	4.0884	0	0	0	4.5593	5.9134	6.1621	5.2953	4.1734	5.7497	4.6384	5.3198	5.1165	4.8704	4.7556
hsa-miR-1296-5p	0	2.44523	0.000640673	-2.44523	5.44611	DOWN		0	0	0	0	0	0	0	0	0	0	0	0	2.9134	4.3965	2.9448	3.9698	0	4.5644	4.2888	0	3.8198	0
hsa-miR-1305	0.376118	2.65965	0.00252933	-2.28354	4.8687	DOWN		0	0	0	0	4.1373	0	0	0	0	0	0	0	3.0509	4.8819	4.2668	2.7328	0	4.0169	3.2246	3.5805	0	3.5018
hsa-miR-1307-3p	8.07959	9.06358	3.8148e-06	-0.983991	1.97793	DOWN		8.1898	8.4309	8.1313	7.154	8.2583	8.4715	7.8742	7.9503	8.468	8.0952	7.852	8.4763	9.1033	8.7184	9.5742	9.3528	9.0796	8.9201	9.4482	8.6249	9.065	9.3366
hsa-miR-1307-5p	5.53835	6.2277	0.000772802	-0.689345	1.61255	DOWN		5.6135	6.0215	5.4468	5.0837	5.4004	6.2626	5.4689	4.7099	6.176	5.8252	4.9134	6.3114	5.9491	5.8116	6.5418	6.3348	6.4866	6.3608	6.5334	5.7821	6.0999	6.2932
hsa-miR-132-5p	0	2.07913	0.0026001	-2.07913	4.22552	DOWN		0	0	0	0	0	0	0	0	0	0	0	4.0118	3.1765	4.1901	0	3.7834	0	0	0	0	3.8198	3.8888
hsa-miR-134-3p	0	2.56082	0.000609512	-2.56082	5.90042	DOWN		0	0	0	0	0	0	0	0	0	0	0	3.6333	3.3989	5.3965	4.0823	0	0	0	4.0131	3.8435	0	3.8014
hsa-miR-135a-3p	0	1.89988	0.00296559	-1.89988	3.73183	DOWN		0	0	0	0	0	0	0	0	0	0	0	0	3.4984	4.0746	3.2079	2.6259	0	0	4.1575	0	3.3344	0
hsa-miR-138-2-3p	5.97132	5.3293	0.00658593	0.642018	1.56051	UP		6.3911	6.2179	6.4121	6.306	6.1373	5.3763	5.617	5.7803	5.374	6.2295	5.843	5.2656	5.3464	5.8819	5.2376	3.7834	5.6672	5.5259	5.5201	6.0134	5.2219	5.1589
hsa-miR-139-5p	6.70202	6.15384	0.00382129	0.548182	1.46224	UP		6.0915	6.5658	6.2244	7.0594	6.9239	6.5798	7.2595	6.0319	7.1109	6.8462	7.0289	5.9838	6.278	5.9491	6.3911	6.5908	5.8277	6.0169	5.9351	6.8584	5.6849	6.1764
hsa-miR-140-3p	10.7276	11.7707	1.30235e-06	-1.04309	2.06064	DOWN		10.578	10.65	10.654	10.737	10.553	10.961	10.896	10.725	10.936	10.639	10.675	12.406	11.346	11.109	11.177	12.167	11.298	12.321	11.858	11.624	12.311	11.861
hsa-miR-141-5p	0.361182	5.95841	6.26581e-11	-5.59723	48.4098	DOWN		0	0	0	0	0	0	0	3.973	0	0	0	5.4813	6.437	7.0132	6.3644	5.8081	5.3346	4.3164	7.4726	6.0659	5.2979	5.9511
hsa-miR-142-3p	14.9744	13.9364	5.94578e-05	1.038	2.05338	UP		15.139	15.041	14.923	14.427	15.324	14.795	15.771	14.601	14.493	14.896	15.308	12.964	13.746	13.731	14.96	14.274	13.573	13.67	13.837	13.724	14.167	14.654
hsa-miR-144-5p	9.56529	10.9943	5.76708e-06	-1.42898	2.69257	DOWN		10.011	9.604	9.6053	9.2853	9.3966	9.3818	10.221	9.525	10.018	8.4792	9.691	12.272	11.306	11.336	10.41	11.682	10.224	10.425	10.534	10.984	11.021	10.743
hsa-miR-145-5p	7.35618	8.13038	0.00233127	-0.7742	1.71024	DOWN		6.45	7.7585	7.0769	7.6362	6.8815	7.6357	7.5074	7.6168	7.6432	7.715	6.9968	7.7123	8.5573	6.9815	7.4684	8.7456	7.8371	8.0307	8.265	8.2301	8.9253	8.6809
hsa-miR-149-3p	6.7503	6.07796	0.000656764	0.672336	1.59365	UP		7.0915	6.6654	6.6984	7.0347	6.7461	6.7913	6.1421	6.6918	6.5643	6.6919	7.1358	6.0118	6.278	7.0595	6.0986	5.5402	6.2236	5.5644	6.6959	5.959	5.8704	5.5562
hsa-miR-149-5p	5.35378	4.63515	0.00733023	0.718627	1.64562	UP		5.6135	5.2439	5.6395	5.1768	5.4004	5.3319	4.9599	5.2949	5.374	5.3815	5.4753	4.3989	4.1765	5.4438	3.7104	3.0954	5.2236	5.5644	4.3502	5.2585	5.0568	4.7082
hsa-miR-150-5p	11.9873	11.1227	0.000598043	0.864545	1.82077	UP		11.776	12.094	11.391	12.735	12.07	12.476	12.001	12.111	11.504	11.929	11.773	11.261	11.054	10.231	12.329	11.797	10.921	11.271	11.358	10.648	10.946	10.534
hsa-miR-151b/151a-5p	9.27136	8.67157	0.000337025	0.599791	1.5155	UP		9.3569	9.3038	9.3213	8.925	9.3853	9.0358	9.9123	8.8637	9.097	9.2999	9.484	8.2539	8.6111	8.0365	9.2413	8.682	8.7547	8.8787	8.3236	8.718	9.0946	8.7929
hsa-miR-152-3p	9.08342	8.5266	7.81884e-05	0.556818	1.47102	UP		9.3873	9.0439	9.3854	8.739	9.4411	8.8157	9.021	8.8879	9.1866	8.9226	9.0871	7.9625	8.6522	8.2644	8.8517	8.715	8.9062	8.6384	8.5433	8.201	8.4719	8.586
hsa-miR-155-5p	9.9832	9.08758	3.83269e-05	0.895618	1.86041	UP		9.996	9.6239	9.6619	10.107	10.311	10.47	10.51	9.486	9.6393	9.7461	10.264	8.4458	9.1052	8.6646	9.8115	9.6986	9.0676	8.7677	9.255	8.6848	9.2604	9.2022
hsa-miR-15a-5p	10.9011	11.8404	7.37928e-05	-0.939273	1.91756	DOWN		11.007	11.046	11.087	10.503	10.589	10.983	11.043	11.441	10.961	10.668	10.584	13.146	11.928	12.084	10.944	12.172	11.465	12.104	11.627	11.629	11.6	11.545
hsa-miR-15b-3p	7.53996	8.28258	0.00151454	-0.742618	1.67321	DOWN		7.45	7.3791	7.4468	7.4247	7.4153	7.7242	7.8961	7.8392	7.9278	7.0952	7.3412	9.6623	8.0713	8.4085	8.028	8.6014	7.3871	8.6293	7.66	8.5393	8.3656	7.7556
hsa-miR-15b-5p	11.3717	12.1536	0.000916418	-0.781909	1.7194	DOWN		11.452	11.449	11.461	11.174	11.008	11.561	11.47	11.744	11.46	11.053	11.257	13.662	12.45	12.093	11.363	12.553	11.616	12.393	11.777	12.043	12.135	11.605
hsa-miR-16-2-3p	12.5031	11.5515	0.00171447	0.951636	1.93407	UP		12.191	12.665	12.802	12.309	12.525	12.532	12.482	12.906	12.266	12.245	12.611	13.583	11.452	11.494	10.447	11.251	10.998	12.28	11.033	11.972	11.576	10.98
hsa-miR-17-3p	1.82313	6.12078	2.25878e-06	-4.29765	19.6663	DOWN		0	3.7585	0	0	0	0	3.8445	4.2949	4.176	0	3.9805	6.5968	6.2209	7.1901	5.8324	5.8912	5.2236	6.0444	6.257	6.5623	6.3162	5.1937
hsa-miR-181a-2-3p	6.27919	7.2635	1.3952e-05	-0.984309	1.97837	DOWN		5.9761	6.5026	5.8619	6.603	6.2417	6.9318	6.8141	5.5173	6.7751	5.867	5.9805	7.2539	7.285	7.4669	7.7104	7.5657	6.9017	6.7258	7.1998	7.3353	6.8453	7.6087
hsa-miR-181a-3p	5.70807	6.68671	0.000592567	-0.978636	1.9706	DOWN		6.0915	6.7941	5.4468	4.9841	5.339	6.0323	5.4689	5.4324	5.374	5.9471	5.8786	5.7708	6.8676	7.0746	7.2739	7.065	6.8086	5.6019	7.6294	6.7663	6.2219	6.4738
hsa-miR-181a-5p	9.66654	10.2629	0.000443536	-0.596318	1.51185	DOWN		9.6579	9.7897	9.7688	9.8278	9.4807	9.5822	9.7004	9.3653	9.2685	9.988	9.9026	9.8621	10.286	10.224	10.829	10.675	10.464	9.4839	10.616	9.7504	10.265	10.436
hsa-miR-181b-3p	0.341682	3.45237	7.97856e-05	-3.11069	8.63796	DOWN		0	3.7585	0	0	0	0	0	0	0	0	0	4.5593	3.9134	4.3965	3.2079	0	4.0392	0	4.5201	4.5805	4.0999	4.6593
hsa-miR-181c-5p	1.99944	4.53871	0.00173016	-2.53927	5.81296	DOWN		0	0	4.3765	4.6362	4.1373	0	0	0	0	4.3227	4.5211	3.8964	4.5457	5.1335	4.7104	4.5402	4.4866	4.9014	4.4656	4.0659	4.9193	4.2608
hsa-miR-1827	6.45871	5.15089	1.1429e-06	1.30782	2.47567	UP		6.6135	6.5451	6.9853	6.2642	6.1008	6.2861	6.2368	6.8637	5.9712	6.4101	6.769	5.9553	5.2639	5.1335	4.1465	5.0752	5.2802	5.6019	4.9746	5.8131	4.4048	5.0108
hsa-miR-185-5p	11.7628	12.9247	3.4921e-06	-1.16191	2.23753	DOWN		11.951	11.623	11.785	11.347	11.518	11.872	11.974	12.056	12.451	11.112	11.702	14.06	12.779	12.434	12.502	13.246	12.666	13.435	12.49	12.895	12.855	12.81
hsa-miR-186-5p	9.58655	10.4236	0.000123622	-0.837091	1.78644	DOWN		9.8368	9.675	9.2591	9.5691	9.2583	9.8476	9.8482	9.8372	9.8468	8.8976	9.5763	11.67	10.343	9.807	10.239	10.411	10.308	10.736	9.955	10.469	10.561	10.161
hsa-miR-188-3p	5.62842	3.08652	4.8292e-05	2.5419	5.82356	UP		5.8936	5.7585	5.3765	5.8206	5.9853	5.3763	5.3888	5.1429	4.9955	6.13	6.0446	0	2.9134	4.297	3.2079	3.449	4.2802	3.6384	4.1575	3.959	0	4.0493
hsa-miR-18a-3p	0	3.90255	1.49812e-08	-3.90255	14.9549	DOWN		0	0	0	0	0	0	0	0	0	0	0	5.3558	3.9838	0	4.2079	3.8796	3.9017	4.84	3.2246	4.718	4.7673	4.0493
hsa-miR-1908-3p	5.2589	4.54154	0.00301581	0.717364	1.64417	UP		5.713	4.896	5.5781	5.6362	5.4593	4.5798	4.8445	4.973	5.8165	5.13	5.2215	4.0118	4.4984	6.1043	4.6229	4.0954	4.5797	4.3164	4.0131	4.6508	4.4048	4.6593
hsa-miR-1909-5p	5.36388	3.41794	0.00973005	1.94595	3.8529	UP		7.8061	5.4366	4.514	5.2642	5.5158	3.6538	4.4294	4.5579	4.176	6.1971	7.4518	0	4.5915	0	2.9448	3.0129	5.1033	4.5644	3.8527	4.959	4.1824	4.3863
hsa-miR-190b	7.14543	6.47704	7.9345e-05	0.668391	1.5893	UP		7.0541	6.9123	7.0318	7.5518	7.0249	7.3092	6.8888	7.0174	7.298	7.6684	6.843	6.6333	6.801	6.4896	6.4684	6.2201	7.0555	6.3388	6.5466	5.6508	6.6272	6.4161
hsa-miR-193a-5p	7.62499	8.35444	0.00595953	-0.729445	1.658	DOWN		7.4643	7.3069	7.9734	7.9182	7.3073	7.7242	7.0539	7.2707	7.9278	8.3959	7.5323	7.6333	9.0672	7.8384	9.0492	8.0803	9.5627	8.8672	8.2164	7.5159	7.8198	8.2484
hsa-miR-199b-5p	4.92779	6.79135	0.00569006	-1.86355	3.63903	DOWN		4.8061	5.2945	4.514	6.4247	0	6.2626	5.6858	5.4755	5.4809	5.4926	4.769	5.5593	5.9838	6.8819	5.7314	7.065	6.006	7.2233	7.6781	6.3246	8.8134	7.438
hsa-miR-19a-3p	8.74806	10.3594	3.34669e-05	-1.61135	3.05539	DOWN		8.834	8.6606	8.7824	8.3163	8.3311	8.9093	9.1813	9.1595	9.1109	8.5957	8.3476	11.691	8.7639	9.747	8.8177	10.521	10.409	10.623	10.414	11.607	10.906	10.454
hsa-miR-19b-3p	10.2502	10.9991	0.00133621	-0.748918	1.68053	DOWN		10.357	10.334	10.06	9.9905	10.054	10.562	10.807	10.638	10.48	9.7684	9.701	12.137	10.603	10.607	10.263	11.363	10.436	11.476	10.611	11.01	11.397	11.087
hsa-miR-203a-3p	8.09756	7.14595	0.0056063	0.951618	1.93404	UP		8.9406	7.722	7.4468	9.3163	7.6609	7.1263	8.1112	9.1529	8.1493	7.9951	7.4518	7.0118	8.0261	7.8384	6.2953	5.9141	7.3871	6.6563	7.1227	8.135	6.8704	7.3482
hsa-miR-203b-5p	6.24973	5.33164	0.00718718	0.918091	1.88961	UP		7.0541	5.722	5.514	7.4056	5.8598	5.4194	6.1175	7.3187	6.0659	6.3227	5.9473	5.0663	5.9314	6.4896	4.5298	3.9254	5.7892	5.1744	5.3198	6.1165	4.9193	5.3863
hsa-miR-208b-3p	5.24193	4.49507	0.00680741	0.746855	1.67813	UP		5.45	4.6065	5.6395	6.4247	4.5158	4.9758	4.5814	5.5579	5.6735	5.3227	4.9134	4.0118	4.0509	4.4896	4.3778	3.6259	4.4866	4.84	4.4656	5.7504	4.2604	5.0868
hsa-miR-20b-5p	8.6918	9.47464	0.00180832	-0.782836	1.72051	DOWN		8.991	8.5914	8.8683	8.0594	8.5365	8.8437	9.021	9.0426	9.0886	8.1214	8.4459	10.547	9.5281	9.2611	8.6397	9.865	9.1534	9.8939	8.3159	9.4825	9.872	9.6624
hsa-miR-2110	5.88805	6.49403	0.00404295	-0.605973	1.522	DOWN		6.298	5.8289	6.4468	5.6362	4.6228	5.9169	5.9033	5.9116	6.1971	6.164	5.843	6.9979	6.5457	7.271	6.3644	6.2292	6.2802	6.5453	6.6959	5.931	6.0999	6.4738
hsa-miR-215-3p	0	1.81291	0.00287742	-1.81291	3.5135	DOWN		0	0	0	0	0	0	0	0	0	0	0	0	3.1765	3.8116	0	2.5104	0	3.7759	3.0871	3.5805	0	0
hsa-miR-217	0.392973	2.93538	0.000435174	-2.54241	5.82561	DOWN		0	0	0	0	0	0	0	0	0	4.3227	0	0	2.9134	4.0746	4.0823	2.7328	0	3.6384	4.2246	3.5805	3.3344	3.7082
hsa-miR-219a-1-3p	2.56669	5.38686	0.000384547	-2.82017	7.06247	DOWN		0	3.896	0	0	4.2748	3.7913	0	4.2949	3.6735	4.1971	4.106	5.669	4.2354	6.512	4.4809	4.6803	5.6241	5.9312	5.0506	6.7663	5.1824	5.1233
hsa-miR-219a-5p	0	2.23766	0.00286495	-2.23766	4.71633	DOWN		0	0	0	0	0	0	0	0	0	0	0	0	3.4984	4.8116	0	0	4.9017	0	3.6721	3.718	4.0125	0
hsa-miR-219b-5p	0	1.784	0.00937178	-1.784	3.4438	DOWN		0	0	0	0	0	0	0	0	0	0	0	0	3.7614	4.1901	0	0	4.2802	0	3.5725	0	3.8198	0
hsa-miR-221-3p	11.3185	11.9642	2.7952e-07	-0.645636	1.56443	DOWN		11.324	11.148	11.271	11.288	11.334	11.349	11.566	11.086	11.195	11.404	11.539	11.64	11.934	11.732	12.363	11.925	12.331	11.672	12.03	12.148	11.903	11.928
hsa-miR-223-3p	17.345	16.5565	0.00565698	0.788545	1.72733	UP		17.173	17.302	16.809	17.765	17.007	18.005	17.434	17.178	17.374	17.637	17.111	15.193	16.195	15.857	16.456	16.95	15.998	16.778	17.323	16.279	17.915	17.177
hsa-miR-223-5p	11.629	10.8608	0.0032163	0.768245	1.7032	UP		11.417	11.596	11.474	12.062	11.398	12.067	11.559	11.249	11.625	12.12	11.352	9.4813	10.453	10.873	10.499	10.83	10.444	11.08	11.665	10.659	12.029	11.455
hsa-miR-22-3p	10.3629	11.5053	7.90993e-06	-1.14236	2.20742	DOWN		10.62	10.176	10.408	10.49	10.246	10.208	10.423	10.396	10.594	10.071	10.36	12.293	12.071	11.825	11.669	11.229	12.407	11.624	10.865	11.099	10.65	10.826
hsa-miR-224-5p	9.56774	8.34251	0.00294636	1.22523	2.33792	UP		8.9199	10.411	9.9463	8.6766	9.2789	9.2508	10.276	8.5276	9.6996	10.445	9.8134	7.0118	9.986	6.8116	8.8826	9.3317	7.9461	7.9675	9.3217	8.5759	7.8004	8.1323
hsa-miR-22-5p	4.91388	6.07817	3.108e-06	-1.16429	2.24123	DOWN		5.3911	5.0215	5.0545	5.0837	4.9853	3.9169	4.5074	4.6359	5.0428	5.6446	4.769	5.7377	6.4984	6.8472	6.1465	5.6803	6.2802	6.3608	5.5201	5.9024	5.8951	5.9912
hsa-miR-2355-5p	0	1.62977	0.00950088	-1.62977	3.09464	DOWN		0	0	0	0	0	0	0	0	0	0	0	0	3.0509	0	0	3.7834	0	0	3.6721	0	3.9193	3.5018
hsa-miR-23c	5.15433	6.04669	6.22473e-05	-0.892364	1.85621	DOWN		4.8936	5.5658	4.514	5.6362	5.339	5.2861	5.3039	4.5579	5.298	5.1971	5.106	4.9553	6.2062	6.1335	5.689	5.7068	6.1033	6.1991	6.2409	6.1893	6.37	6.7202
hsa-miR-24-1-5p	0	1.85835	0.00301343	-1.85835	3.62594	DOWN		0	0	0	0	0	0	0	0	0	0	0	0	3.679	0	2.9448	2.7328	4.2802	0	3.0871	3.718	0	0
hsa-miR-24-2-5p	0	2.36564	0.000732167	-2.36564	5.1538	DOWN		0	0	0	0	0	0	0	0	0	0	0	0	3.2919	3.8116	4.2079	2.2474	0	0	4.5201	0	4.3344	3.6087
hsa-miR-25-3p	13.2749	13.8649	0.00937401	-0.59	1.50525	DOWN		13.136	13.303	13.017	13.279	12.811	13.823	13.452	13.588	13.746	12.694	13.175	15.17	14.252	13.469	13.16	14.223	13.243	14.207	13.629	13.773	13.884	13.504
hsa-miR-2681-3p	0.729455	3.8032	0.000171226	-3.07375	8.41956	DOWN		4.1281	0	0	0	0	0	0	0	3.8959	0	0	3.7708	4.9134	5.3965	4.6673	2.6259	3.9017	0	4.5725	5.0134	3.4719	3.5018
hsa-miR-26a-5p	14.6945	14.2207	0.00487417	0.473818	1.38878	UP		14.663	14.744	14.566	14.426	14.737	14.717	15.187	14.619	14.424	14.597	14.96	14.057	14.115	13.34	14.708	14.542	13.682	14.055	14.407	14.127	14.694	14.701
hsa-miR-26b-5p	14.8073	14.314	0.00458935	0.493273	1.40763	UP		14.809	14.822	14.478	14.353	14.843	14.939	15.388	14.947	14.668	14.572	15.061	14.835	14.344	13.495	14.584	14.56	13.833	13.998	14.342	14.061	14.817	14.585
hsa-miR-296-5p	1.52704	4.77133	0.000138125	-3.24429	9.47608	DOWN		4.2656	0	4.3765	0	0	0	3.9599	4.1954	0	0	0	6.669	4.7614	4.9491	3.7104	4.449	6.0392	4.6384	4.2888	4.5805	4.0125	4.3863
hsa-miR-29a-3p	10.5005	11.6852	3.52835e-07	-1.18473	2.2732	DOWN		10.536	10.503	10.298	11.042	10.459	10.708	10.485	10.463	10.333	10.6	10.078	11.546	12.144	10.586	11.838	11.939	11.323	12.311	11.672	11.499	12.015	11.664
hsa-miR-29a-5p	0.338082	2.71595	0.00126231	-2.37787	5.1977	DOWN		0	0	0	0	0	0	3.7189	0	0	0	0	0	0	4.0746	3.6229	3.3178	0	3.9014	3.9351	4.4285	3.3344	3.2608
hsa-miR-29b-1-5p	2.76685	4.78185	0.00789256	-2.015	4.04181	DOWN		0	4.4366	0	0	0	4.7242	3.9599	4.388	4.176	4.6446	4.106	5.2656	4.1151	4.3965	4.5298	4.283	4.3871	5.3164	4.5201	5.5805	5.4048	4.8014
hsa-miR-29c-3p	10.7023	11.4934	0.000305311	-0.791091	1.73038	DOWN		10.902	10.76	10.686	10.915	10.491	10.731	10.605	11.048	10.964	10.421	10.202	12.648	11.392	10.874	10.805	11.889	10.95	11.791	11.395	11.203	11.804	11.676
hsa-miR-302e	10.1384	7.80293	9.82509e-10	2.33545	5.0471	UP		10.419	10.051	10.638	10.319	10.14	9.6057	9.6604	10.216	9.9985	10.521	9.9536	7.4913	7.7463	9.0708	7.747	6.7709	8.0716	6.84	8.1703	7.9932	7.699	8.2318
hsa-miR-3064-5p	0.337264	2.35424	0.00630134	-2.01697	4.04734	DOWN		0	0	0	0	0	0	0	3.7099	0	0	0	0	3.9134	0	3.0823	3.449	0	0	3.6721	3.718	4.0125	4.0493
hsa-miR-30a-3p	6.74612	5.71654	4.28759e-07	1.02958	2.04143	UP		6.6888	6.646	7.0087	6.4987	7.0633	6.8238	6.946	6.2949	6.3554	6.9856	6.8961	5.4813	5.8583	5.7376	6.3233	6.1349	5.9373	5.5259	5.6232	5.0659	5.9666	5.2276
hsa-miR-30e-3p	8.84461	8.21588	0.000712065	0.628727	1.5462	UP		8.8989	9.0026	8.6619	8.7003	8.6672	8.898	9.5263	8.612	9.0399	8.4451	8.8385	7.4713	8.1384	7.9243	8.5973	8.884	7.9548	7.9531	8.4305	7.9096	8.8262	8.2852
hsa-miR-3117-5p	0	1.69929	0.00958307	-1.69929	3.24741	DOWN		0	0	0	0	0	0	0	0	0	0	0	0	3.8394	4.297	3.5298	0	0	0	3.7652	0	0	3.2608
hsa-miR-3118	0	4.43821	7.76257e-09	-4.43821	21.6787	DOWN		0	0	0	0	0	0	0	0	0	0	0	4.7708	4.6359	5.2445	5.7928	4.5979	3.9017	0	4.7652	5.468	4.7129	4.9306
hsa-miR-3129-5p	1.23448	5.00958	1.66495e-05	-3.7751	13.6905	DOWN		4.5066	0	0	4.9841	0	0	0	0	4.0886	0	0	5.0118	4.9491	5.8472	5.5771	3.9698	5.2802	3.9014	5.1227	4.7821	4.7129	5.9511
hsa-miR-3132	0	2.17006	0.00273122	-2.17006	4.50043	DOWN		0	0	0	0	0	0	0	0	0	0	0	0	4.4495	4.297	3.7104	0	0	0	4.2246	4.0659	0	3.1233
hsa-miR-3133	0	2.20115	0.00289651	-2.20115	4.59844	DOWN		0	0	0	0	0	0	0	0	0	0	0	0	3.4984	4.8819	3.7928	0	0	0	4.3502	4.4285	0	3.2608
hsa-miR-3143	1.47984	3.62362	0.00897764	-2.14378	4.41919	DOWN		0	4.2439	0	0	0	4.1393	0	0	3.6735	0	4.2215	5.2183	4.5457	4.4896	3.3233	3.7328	0	3.7759	3.5725	4.0659	4.0125	3.1233
hsa-miR-3150b-5p	0.333955	2.45708	0.00591903	-2.12313	4.35637	DOWN		0	0	0	0	0	0	0	0	3.6735	0	0	4.0118	3.679	4.7376	4.3778	3.0954	3.9017	0	3.2246	0	0	0
hsa-miR-3158-3p	1.13355	3.66353	0.00200037	-2.52997	5.77561	DOWN		0	4.0215	0	0	0	0	0	3.7099	0	4.7377	0	5.2183	4.2354	4.0746	0	3.3849	3.9017	4.4864	3.2246	3.959	4.0125	3.8014
hsa-miR-3161	0	2.00194	0.00296796	-2.00194	4.00537	DOWN		0	0	0	0	0	0	0	0	0	0	0	0	0	4.297	3.7928	2.5104	3.9017	0	0	3.718	0	3.8014
hsa-miR-3183	1.05719	4.05035	0.000486898	-2.99316	7.96218	DOWN		0	3.7585	0	0	0	0	0	0	3.6735	4.1971	0	0	4.679	5.5771	3.2079	3.0129	4.3871	4.4039	4.5201	5.4285	4.536	4.8014
hsa-miR-3185	5.99997	4.21456	0.00108863	1.78541	3.44716	UP		6.1637	5.722	6.264	6.6362	5.7696	5.8555	5.6518	5.5579	5.4809	6.5191	6.379	4.7708	4.8769	5.6991	4.4303	3.6803	4.9017	0	4.6232	5.0134	3.9193	4.4452
hsa-miR-3202	0	1.80335	0.00306816	-1.80335	3.49031	DOWN		0	0	0	0	0	0	0	0	0	0	0	0	0	4.1901	3.2079	2.3849	0	0	3.3502	3.5805	0	3.1233
hsa-miR-320a	11.8825	12.912	5.79658e-07	-1.02945	2.04125	DOWN		11.773	11.794	12.141	11.788	11.718	12.069	11.589	12.091	12.086	11.943	11.716	13.119	12.893	13.813	13.145	12.709	13.38	12.605	12.858	12.705	12.222	12.583
hsa-miR-320b	10.1704	10.9779	0.000224498	-0.807518	1.7502	DOWN		9.991	10.057	10.686	10.508	10.341	9.9411	9.7533	10.29	10.09	10.356	9.8609	10.621	10.895	12.034	11.187	10.499	11.496	11.346	10.717	11.153	10.254	10.555
hsa-miR-323b-5p	1.59701	4.02791	0.00702928	-2.4309	5.3923	DOWN		0	0	0	0	0	0	3.7189	0	4.6121	4.3227	4.9134	0	4.3989	5.8116	4.2079	3.7834	5.5339	3.7759	4.3502	3.959	4.0999	4.3863
hsa-miR-335-3p	6.54675	5.72224	0.00207684	0.824509	1.77093	UP		6.561	6.8116	6.3399	6.1768	7.0052	6.2626	7.0924	6.4104	5.8959	6.545	6.9134	4.4813	5.8394	5.6189	6.5298	6.0752	5.3871	5.7088	6.2246	4.5805	6.2219	6.2771
hsa-miR-335-5p	11.3477	10.7461	0.00258043	0.601582	1.51738	UP		11.568	11.358	11.31	10.784	11.398	10.848	11.918	11.362	11.596	11.475	11.208	9.8926	10.629	10.487	11.436	10.804	10.817	10.413	11.125	10.186	11.092	11.326
hsa-miR-337-3p	0	2.16704	0.00267663	-2.16704	4.491	DOWN		0	0	0	0	0	0	0	0	0	0	0	0	0	0	3.3233	3.6259	4.0392	4.3164	4.5201	0	4.0125	0
hsa-miR-339-3p	6.40093	7.55481	2.47352e-05	-1.15388	2.22512	DOWN		7.3607	6.0804	6.7269	5.1768	6.2748	6.3763	6.2819	6.7974	6.7033	5.8252	6.8065	8.5306	7.3989	7.8733	7.5238	7.3517	7.2236	7.259	7.3502	7.8659	7.37	7.3559
hsa-miR-340-5p	9.92271	9.38296	0.000829746	0.539745	1.45372	UP		10.108	9.8029	9.5383	9.5605	9.8405	9.8515	10.382	9.8978	10.206	9.9593	10.003	9.0895	9.2062	8.5231	9.5403	9.6559	9.2836	9.2851	9.5033	9.4582	9.7024	9.965
hsa-miR-342-3p	12.413	11.4114	0.000141405	1.00164	2.00227	UP		11.919	12.433	11.866	12.599	12.589	13.054	12.238	12.233	12.667	12.614	12.331	11.081	11.296	10.3	12.212	12.343	10.573	11.816	11.705	11.403	11.46	11.336
hsa-miR-345-3p	0.876164	3.70603	0.000925775	-2.82986	7.11007	DOWN		0	0	4.3765	0	0	0	0	0	0	5.2613	0	4.1188	4.3464	5.1901	4.4303	2.3849	4.6672	0	4.1575	3.5805	3.9193	3.9713
hsa-miR-345-5p	5.49765	6.69495	5.23387e-10	-1.1973	2.2931	DOWN		5.2656	4.8289	5.5781	5.7003	5.5158	5.7913	5.6518	5.6734	5.6121	5.6919	5.1649	6.866	6.7104	6.6596	7.0152	6.6119	6.5105	6.3388	6.4376	6.8732	6.8198	6.8014
hsa-miR-34a-5p	6.6021	8.01641	0.00171289	-1.41431	2.66532	DOWN		6.3297	6.7585	5.8619	6.7313	6.8598	6.1899	7.202	7.2828	7.1971	5.6446	6.5655	8.1188	9.7065	6.0442	9.0823	8.0954	9.1496	9.3051	6.9149	7.3353	7.1924	7.236
hsa-miR-34c-5p	1.05118	3.98225	0.000834627	-2.93107	7.62677	DOWN		0	0	0	4.4987	0	3.6538	0	0	3.4105	0	0	0	3.679	5.0132	3.7104	2.3849	5.0392	4.0169	6.4376	4.0659	4.3344	5.1233
hsa-miR-3614-5p	0.341682	2.50021	0.00552304	-2.15853	4.46459	DOWN		0	3.7585	0	0	0	0	0	0	0	0	0	0	0	3.8116	3.7928	3.1734	0	4.1238	4.1575	0	4.1824	4.2608
hsa-miR-3615	7.72288	8.66287	3.59157e-05	-0.939991	1.91852	DOWN		7.3139	7.9042	7.755	8.2429	7.0633	8.7455	7.2819	8.0533	7.6508	7.6919	7.249	9.3338	8.437	8.8161	8.3303	8.8248	8.4439	9.0512	8.6959	8.4384	8.4429	8.4773
hsa-miR-3616-3p	4.10964	0	3.1165e-06	4.10964	17.2633	UP		4.9761	3.7585	6.264	5.4987	0	0	4.6518	5.2949	4.9955	5.4381	4.3284	0	0	0	0	0	0	0	0	0	0	0
hsa-miR-3621	0	2.28706	0.000548644	-2.28706	4.88062	DOWN		0	0	0	0	0	0	0	0	0	0	0	0	3.8394	3.9491	3.4303	2.7328	0	4.1238	0	3.5805	0	3.5018
hsa-miR-362-3p	0	2.07855	0.00278137	-2.07855	4.22384	DOWN		0	0	0	0	0	0	0	0	0	0	0	4.3989	0	0	3.4303	3.0954	3.9017	0	0	0	3.7129	4.3249
hsa-miR-363-3p	8.74205	9.62294	0.000203309	-0.880882	1.8415	DOWN		8.834	8.508	8.6839	8.8772	8.4375	9.1263	8.9105	8.9842	8.707	8.2375	8.8565	10.873	9.8757	9.9263	8.9583	9.9996	9.5965	9.9126	8.7482	9.3165	9.4801	9.1655
hsa-miR-3648	1.11379	5.17719	2.48272e-06	-4.0634	16.7188	DOWN		4.5066	0	0	0	0	0	0	0	3.548	4.1971	0	5.3558	4.5457	6.4669	4.9083	3.7834	5.0392	5.4864	4.8527	6.4874	5.2219	4.8014
hsa-miR-3656	6.02945	5.33123	0.00991345	0.698218	1.6225	UP		6.0915	6.0215	6.8359	6.4987	6.1008	6.3543	5.2137	5.3422	5.9955	6.2613	5.6085	6.1694	4.679	6.297	5.6453	5.1153	6.2236	4.7759	5.257	5.1654	4.6563	4.6593
hsa-miR-3665	0	2.44143	6.65939e-05	-2.44143	5.43179	DOWN		0	0	0	0	0	0	0	0	0	0	0	3.6333	3.1765	0	3.4303	2.3849	3.9017	0	3.3502	3.718	0	3.2608
hsa-miR-3669	0	5.00395	1.89478e-17	-5.00395	32.0876	DOWN		0	0	0	0	0	0	0	0	0	0	0	4.3114	4.6359	5.1901	5.689	4.3178	5.3871	4.7088	5.5201	5.8732	4.1824	5.2276
hsa-miR-3674	7.42868	8.48877	5.13327e-05	-1.06009	2.08506	DOWN		7.7603	7.4589	7.8619	7.6525	7.6228	6.6718	7.001	7.3422	7.327	7.9569	7.0602	7.8192	8.5044	9.3194	8.4963	7.7865	8.8744	7.8003	9.3426	8.33	8.3162	8.7872
hsa-miR-3679-3p	0	4.75784	1.50375e-14	-4.75784	27.0552	DOWN		0	0	0	0	0	0	0	0	0	0	0	4.3114	4.9838	5.3476	5.7314	4.5402	3.9017	3.9014	5.4931	5.346	3.3344	5.4452
hsa-miR-3688-3p	4.73399	2.16335	0.0011188	2.57065	5.94075	UP		5.6135	3.7585	6.4808	4.8772	4.8154	3.7913	4.6518	4.5579	4.4809	4.4381	4.6085	4.7037	3.4984	0	0	3.2474	0	4.4039	0	3.8435	4.0999	0
hsa-miR-3692-5p	1.97805	4.98757	0.000478015	-3.00953	8.053	DOWN		4.6135	3.896	4.514	0	0	0	4.2595	4.4755	0	0	0	4.4813	4.801	6.0132	5.8897	4.2474	4.7497	3.6384	5.9149	5.0659	5.0125	5.0493
hsa-miR-369-5p	7.35013	5.87697	0.00135725	1.47315	2.77628	UP		8.0445	7.6939	7.6839	6.7003	7.6609	6.8397	6.7831	8.6072	6.133	7.2769	7.428	5.0118	5.9314	5.4438	5.0152	6.7583	6.7696	6.9889	7.273	4.0659	6.8326	4.5562
hsa-miR-372-3p	3.71741	0.354673	7.77571e-05	3.36274	10.2869	UP		4.6135	0	5.6984	0	4.4004	3.7913	4.347	3.7099	4.4105	4.6446	5.2759	0	0	0	0	0	0	3.9014	0	0	0	0
hsa-miR-374a-3p	6.97686	6.4556	0.00065776	0.521264	1.43521	UP		6.9354	6.9123	7.3213	6.9841	6.8378	6.5798	7.6689	6.8143	6.9088	6.6919	7.0909	6.3558	6.437	6.1901	6.3508	6.6669	6.006	6.2937	6.4517	6.3246	7.0893	6.8457
hsa-miR-378a-3p	7.69162	8.97074	6.39871e-10	-1.27912	2.42691	DOWN		7.3453	7.6654	7.8094	7.4987	7.4448	7.9018	7.5814	7.9116	8.0311	7.9665	7.4518	9.1506	9.1326	8.775	8.7024	9.1875	9.4158	9.2648	8.4198	9.0851	8.8453	8.6992
hsa-miR-378a-5p	3.00278	5.07691	0.00270161	-2.07413	4.2109	DOWN		4.1281	0	0	0	4.5158	4.1393	3.7189	4.0884	3.789	4.3227	4.3284	5.835	5.4495	5.534	4.5298	4.7068	4.9017	5.4457	4.0871	5.3029	5.2979	4.7556
hsa-miR-378b	0.392973	2.48126	0.00404926	-2.08829	4.25244	DOWN		0	0	0	0	0	0	0	0	0	4.3227	0	0	2.9134	4.6596	3.4303	2.3849	0	3.7759	3.6721	0	3.3344	3.1233
hsa-miR-378c	5.72025	7.32101	6.41802e-12	-1.60076	3.03304	DOWN		5.1984	5.7941	6.2244	6.131	5.5703	5.7913	5.7513	5.8799	5.761	5.4926	5.3284	7.2887	7.5457	7.3723	7.1227	7.4213	7.709	7.3825	7.032	7.0267	7.3612	7.269
hsa-miR-378d	1.61121	5.66033	1.01306e-05	-4.04912	16.5541	DOWN		0	0	0	0	0	3.6538	4.5814	0	4.8435	4.6446	0	5.6333	6.1765	5.7376	5.1775	5.5548	6.2236	5.9014	4.9746	6.1412	5.6563	5.0868
hsa-miR-378e	0.387782	2.47862	0.0080032	-2.09084	4.25995	DOWN		4.2656	0	0	0	0	0	0	0	0	0	0	0	3.9134	0	4.0152	3.6259	0	4.1238	0	4.1654	3.7129	3.7082
hsa-miR-378h	0.349364	3.19024	0.000118171	-2.84087	7.16453	DOWN		0	0	0	0	0	0	0	0	0	0	3.843	0	0	4.3965	3.8708	3.5104	4.2802	4.1238	3.8527	3.8435	3.7129	3.5018
hsa-miR-378i	1.89045	4.87399	0.000233416	-2.98355	7.90927	DOWN		0	0	0	0	0	0	3.9599	3.973	4.3365	4.1971	4.3284	5.1694	5.0834	5.534	4.7928	4.3517	4.4866	5.1238	4.5201	5.346	4.8198	4.3863
hsa-miR-379-5p	8.82041	7.19287	0.000196685	1.62754	3.08985	UP		8.6263	9.4196	9.6948	8.3366	9.335	8.7328	8.6816	9.3596	7.6277	8.8566	8.3539	5.5968	6.9134	7.7564	7.1148	8.1662	7.4377	8.0099	8.5433	5.5805	7.8262	6.1764
hsa-miR-382-5p	10.3701	9.16068	0.00718863	1.20943	2.31246	UP		11.075	10.477	10.833	9.6606	10.754	9.9037	9.723	11.705	9.0399	10.232	10.668	7.3001	8.6304	9.7376	9.3216	9.6986	9.9062	10.145	10.624	7.6679	9.8262	7.9099
hsa-miR-3928-3p	0	3.63185	1.13569e-08	-3.63185	12.3964	DOWN		0	0	0	0	0	0	0	0	0	0	0	0	3.5915	4.8116	3.7104	3.449	4.9017	3.6384	4.0871	3.5805	3.9193	4.2608
hsa-miR-3943	4.302	1.71826	0.002776	2.58374	5.9949	UP		4.713	4.6065	5.3765	0	4.9853	3.7913	4.0668	4.973	4.3365	5.4926	4.9805	0	3.1765	4.5771	3.7104	0	0	0	3.4656	0	0	3.9713
hsa-miR-409-3p	9.86963	7.99515	0.000446882	1.87447	3.66668	UP		10.415	10.242	10.412	8.8841	10.221	9.6982	9.4369	11.081	8.8131	9.5515	9.8111	5.5209	7.8676	8.3538	7.8028	8.9547	8.8789	9.0747	9.4	6.0914	9.1131	6.8888
hsa-miR-411-3p	0	2.01025	0.00256979	-2.01025	4.02853	DOWN		0	0	0	0	0	0	0	0	0	0	0	0	3.8394	4.0746	3.3233	0	0	3.7759	3.7652	0	3.3344	0
hsa-miR-411-5p	7.44814	5.93485	0.00117436	1.51328	2.85459	UP		7.376	8.231	8.4382	6.6686	7.9239	7.0461	7.4194	7.9272	5.9466	7.7035	7.249	3.6333	5.6576	6.1335	6.2668	7.0392	5.9373	6.4864	7.3121	4.959	7.0568	4.8014
hsa-miR-423-3p	8.69971	9.19028	0.000518771	-0.490573	1.405	DOWN		8.713	8.6115	8.4639	8.603	8.7041	8.7707	8.9942	8.3936	8.6432	8.6861	9.1135	9.1284	9.0854	8.6343	9.8944	9.48	9.2522	8.8123	9.3964	9.0399	9.1443	9.2255
hsa-miR-423-5p	14.3024	13.8485	0.00559857	0.453909	1.36975	UP		14.19	14.1	14.777	14.237	14.106	14.331	14.402	14.285	14.326	14.279	14.293	14.72	13.76	14.527	13.475	13.601	14.117	14.07	13.594	13.56	13.528	13.381
hsa-miR-4253	0	1.90039	0.00323756	-1.90039	3.73314	DOWN		0	0	0	0	0	0	0	0	0	0	0	0	0	4.1901	2.9448	2.3849	4.0392	0	0	3.8435	0	3.5018
hsa-miR-425-3p	7.62218	8.07354	0.00289375	-0.451355	1.36732	DOWN		8.0253	7.5346	7.5623	7.131	7.0633	8.1198	7.6432	7.5679	7.9278	7.5579	7.7109	8.317	7.7	7.4554	8.4238	8.1004	7.9634	7.9531	8.0916	8.1774	8.2556	8.3712
hsa-miR-4257	0.466364	2.80522	0.00489287	-2.33885	5.05901	DOWN		0	0	0	0	0	0	0	0	0	5.13	0	4.3989	3.3989	5.297	0	2.8323	0	0	3.7652	3.8435	3.8198	3.5018
hsa-miR-4268	1.07883	4.33191	0.000265616	-3.25308	9.534	DOWN		4.1281	3.896	0	0	0	0	0	0	0	0	3.843	0	5.0509	6.3965	4.3233	3.9698	4.9721	4.9014	5.1915	4.5805	3.8198	4.4452
hsa-miR-4298	0.707891	4.00854	6.07143e-05	-3.30065	9.85356	DOWN		0	0	0	0	0	3.7913	0	0	3.9955	0	0	4.1188	4.1151	6.0746	4.0152	3.3178	4.2802	0	4.409	4.5065	4.5974	4.6593
hsa-miR-4306	3.65781	5.71216	0.00185301	-2.05435	4.15358	DOWN		4.1281	4.4366	4.755	0	0	4.2388	4.4294	5.0319	5.176	4.1971	3.843	6.2887	5.4244	6.0442	4.8708	5.8081	5.9373	6.3164	5.3502	5.7504	5.6272	5.4161
hsa-miR-4308	0	1.90061	0.00997888	-1.90061	3.73371	DOWN		0	0	0	0	0	0	0	0	0	0	0	0	3.2919	4.297	0	0	4.9017	0	4.3502	4.0659	0	0
hsa-miR-4317	0	4.60929	1.32726e-16	-4.60929	24.4082	DOWN		0	0	0	0	0	0	0	0	0	0	0	3.6333	5.0509	5.534	4.7104	4.2108	5.0392	3.6384	5.0871	4.7821	4.2604	4.7556
hsa-miR-4318	0	6.52818	1.12255e-16	-6.52818	92.2951	DOWN		0	0	0	0	0	0	0	0	0	0	0	6.0118	6.9578	7.2039	7.1227	6.6465	6.1945	4.7088	8.0644	6.5065	6.0999	6.2932
hsa-miR-432-5p	10.3461	8.83196	0.00392633	1.5141	2.85621	UP		9.5875	11.003	11.198	10.122	11.009	10.547	9.9495	10.857	9.1787	10.308	10.047	6.3989	8.271	9.3935	8.6173	10.068	9.6566	9.3852	10.839	6.8732	9.971	7.6779
hsa-miR-4328	0	2.26989	0.000590082	-2.26989	4.82287	DOWN		0	0	0	0	0	0	0	0	0	0	0	0	3.3989	0	0	2.5104	4.2802	3.7759	3.5725	3.718	3.7129	0
hsa-miR-4440	6.65927	3.04671	1.82049e-05	3.61256	12.2318	UP		7.3607	7.0948	6.7824	6.9581	6.2748	6.6173	5.9874	6.8799	5.9215	6.9471	6.428	3.6333	4.1151	5.9159	3.5298	3.0954	0	4.1238	4.0871	5.0134	0	0
hsa-miR-4451	5.29817	4.0457	6.97288e-05	1.25247	2.38249	UP		5.8061	5.137	5.514	6.131	5.2748	4.7242	5.0668	4.5579	4.9955	5.6446	5.428	3.7708	4.5915	4.6596	3.9448	2.5104	4.0392	4.0169	5.0131	4.6508	3.5974	3.7082
hsa-miR-4454	5.20884	6.93248	9.63586e-08	-1.72365	3.3027	DOWN		5.3911	5.3434	4.8619	5.4247	4.4004	6.1133	4.8445	5.1954	5.7324	4.8252	5.1649	7.4713	6.6249	6.3225	7.2595	7.1781	5.9017	7.1109	6.731	6.6848	7.5202	7.4524
hsa-miR-4474-5p	0	2.01446	0.00305964	-2.01446	4.0403	DOWN		0	0	0	0	0	0	0	0	0	0	0	3.8964	2.9134	4.7376	3.6229	0	3.9017	0	3.0871	0	0	0
hsa-miR-4476	0	1.84739	0.00302513	-1.84739	3.59849	DOWN		0	0	0	0	0	0	0	0	0	0	0	0	3.2919	4.0746	0	2.3849	0	0	3.4656	3.8435	0	3.2608
hsa-miR-4481	1.53585	4.37775	0.000530368	-2.84189	7.16959	DOWN		0	3.7585	4.514	0	4.4004	0	0	0	0	0	4.2215	4.8964	4.5915	5.775	4.2668	2.8323	4.9017	3.7759	5.1915	3.8435	3.8198	4.2608
hsa-miR-4488	0.3814	2.36673	0.00985942	-1.98533	3.95952	DOWN		0	0	0	0	0	0	0	4.1954	0	0	0	0	3.0509	3.9491	4.2668	3.0129	0	0	3.4656	4.5805	0	3.7082
hsa-miR-4490	0	1.58231	0.00999063	-1.58231	2.99449	DOWN		0	0	0	0	0	0	0	0	0	0	0	0	3.5915	0	3.3233	0	4.2802	0	3.0871	0	0	3.1233
hsa-miR-4513	0.310045	2.6728	0.00142634	-2.36275	5.14351	DOWN		0	0	0	0	0	0	0	0	3.4105	0	0	4.3989	3.1765	4.9491	3.0823	2.2474	3.9017	0	0	3.8435	0	3.8014
hsa-miR-451a	13.9708	15.362	3.2453e-05	-1.39118	2.62293	DOWN		13.96	14.063	13.921	14.015	13.612	14.62	13.799	14.286	13.982	13.694	13.727	16.897	14.99	15.527	13.674	15.66	15.71	15.908	14.92	15.814	15.076	14.806
hsa-miR-451b	8.2367	9.14822	0.00124794	-0.911518	1.88102	DOWN		8.3453	8.1508	8.2929	7.9712	8.1283	8.7707	7.9033	8.5679	8.1054	8.2999	8.068	9.4277	8.7208	9.8862	7.2953	9.3167	9.6539	9.84	8.8841	9.8952	8.9608	8.7497
hsa-miR-4524a-5p	0	2.53205	8.78908e-05	-2.53205	5.78391	DOWN		0	0	0	0	0	0	0	0	0	0	0	0	2.9134	4.3965	3.0823	2.5104	0	0	4.2888	3.718	3.3344	3.6087
hsa-miR-4532	6.20394	7.36568	0.00169675	-1.16175	2.23728	DOWN		5.8505	6.0513	5.3025	6.4622	6.2077	6.2861	5.617	7.0604	6.5148	6.8462	6.0446	8.0862	8.1951	6.0132	8.3337	6.6328	8.6619	8.0846	6.3044	7.0267	6.5516	7.1323
hsa-miR-4533	1.65452	4.22297	0.00197887	-2.56845	5.93174	DOWN		4.2656	0	4.9614	4.6362	0	0	0	0	4.3365	0	0	4.2183	4.6359	4.7376	3.7928	2.8323	5.2236	3.9014	4.6721	4.718	3.9193	3.8014
hsa-miR-4635	5.78662	4.92175	0.000486203	0.864873	1.82118	UP		5.8505	6.137	6.514	6.4987	5.8598	5.6538	5.1175	5.4324	5.2179	5.4926	5.8786	4.5593	4.7614	6.1043	5.1465	4.449	5.0392	4.5644	5.4376	5.0134	4.4048	4.6593
hsa-miR-4640-5p	0.410527	3.66011	0.000191351	-3.24958	9.5109	DOWN		0	0	0	0	4.5158	0	0	0	0	0	0	4.2183	3.9134	5.8819	4.6229	3.3178	5.3346	0	4.5201	4.0659	0	4.3863
hsa-miR-4650-5p	0.337264	2.36264	0.00711376	-2.02537	4.07097	DOWN		0	0	0	0	0	0	0	3.7099	0	0	0	0	3.0509	4.6596	3.0823	0	0	4.4039	3.2246	4.0659	0	3.5018
hsa-miR-4651	5.15288	4.1115	0.000997634	1.04138	2.0582	UP		5.9761	4.7585	5.5781	5.8206	5.4004	5.0868	4.7831	4.4755	4.789	4.9076	5.106	3.7708	4.0509	5.297	4.4809	3.0954	5.5339	4.1238	3.7652	3.5805	3.3344	4.1937
hsa-miR-4658	0	2.24379	0.000525373	-2.24379	4.7364	DOWN		0	0	0	0	0	0	0	0	0	0	0	0	3.1765	3.8116	4.0152	3.0129	0	0	3.2246	3.8435	3.5974	0
hsa-miR-4676-5p	0.421473	2.676	0.00839238	-2.25453	4.77178	DOWN		0	0	0	4.6362	0	0	0	0	0	0	0	3.7708	4.2354	4.8819	4.0152	0	3.9017	0	4.4656	4.1654	0	0
hsa-miR-4677-5p	4.717	2.30089	0.000521522	2.41611	5.3373	UP		4.5066	4.6065	4.3765	4.8772	5.7223	4.3319	4.8445	5.0319	3.9955	4.9856	4.6085	3.6333	3.1765	4.7376	3.3233	3.0129	0	0	0	4.1654	0	3.2608
hsa-miR-4685-3p	1.12215	3.65139	0.00177498	-2.52925	5.7727	DOWN		0	3.7585	0	0	0	0	0	3.8474	0	4.7377	0	3.7708	4.2919	3.9491	3.3233	3.3178	4.3871	4.6384	4.3502	4.4285	0	3.7082
hsa-miR-4685-5p	0.673845	3.73075	6.42638e-05	-3.05691	8.32188	DOWN		0	3.7585	0	0	0	3.6538	0	0	0	0	0	3.6333	4.0509	4.8116	3.7104	3.0954	4.9017	4.3164	3.7652	4.4285	0	4.3249
hsa-miR-4687-5p	5.44024	4.46509	0.00672776	0.975145	1.96584	UP		6.8285	5.722	6.0087	4.6362	5.4004	4.4194	4.1664	4.973	5.3365	5.4381	6.9134	4.1188	4.2354	5.2445	4.5298	3.1734	4.8277	4.9014	5.0131	4.6508	3.9193	4.5018
hsa-miR-4697-5p	0	2.41269	0.000730459	-2.41269	5.32467	DOWN		0	0	0	0	0	0	0	0	0	0	0	0	2.9134	4.8116	4.0152	3.0129	4.8277	0	3.5725	0	0	3.3863
hsa-miR-4712-5p	0	2.20776	0.00310766	-2.20776	4.61959	DOWN		0	0	0	0	0	0	0	0	0	0	0	0	3.679	5.0746	3.7928	3.1734	0	0	4.8527	0	3.7129	0
hsa-miR-4713-3p	0	2.98217	0.000939241	-2.98217	7.90175	DOWN		0	0	0	0	0	0	0	0	0	0	0	3.6333	5.1461	6.3225	3.0823	0	0	0	5.7194	5.3029	3.5974	0
hsa-miR-4713-5p	0	2.31725	0.00281389	-2.31725	4.98383	DOWN		0	0	0	0	0	0	0	0	0	0	0	0	3.8394	5.0746	4.3778	0	0	0	3.3502	4.346	0	4.5018
hsa-miR-4716-5p	1.2414	3.44041	0.00918064	-2.19901	4.59164	DOWN		0	0	0	0	4.1373	0	0	4.1954	0	5.3227	0	0	3.4984	5.5771	2.9448	3.1734	3.9017	3.9014	4.2246	3.5805	3.3344	3.7082
hsa-miR-4718	6.09295	4.5884	4.53902e-06	1.50455	2.83735	UP		6.3607	5.8628	6.5464	6.131	6.5968	5.5018	5.9599	6.0604	5.6432	6.6684	5.691	4.3114	4.1765	6.3723	4.6673	4.0129	4.2802	4.1238	5.2888	4.718	4.2604	4.2608
hsa-miR-4742-3p	0	1.93208	0.00288909	-1.93208	3.81605	DOWN		0	0	0	0	0	0	0	0	0	0	0	4.0118	0	4.0746	3.4303	2.6259	0	3.7759	0	0	3.3344	0
hsa-miR-4743-3p	0	2.68416	0.000635732	-2.68416	6.42708	DOWN		0	0	0	0	0	0	0	0	0	0	0	0	4.0509	5.6991	0	3.5693	4.5797	0	3.8527	4.0659	0	3.7082
hsa-miR-4745-5p	0.783109	3.46471	0.00187206	-2.6816	6.41567	DOWN		0	0	0	0	0	0	0	0	3.789	4.8252	0	0	4.0509	4.8819	4.5298	3.6259	4.4866	0	4.0871	4.5065	4.3344	3.6087
hsa-miR-4746-3p	1.33735	3.98147	0.00466266	-2.64412	6.25114	DOWN		0	0	5.6984	0	5.339	0	0	0	3.6735	0	0	0	4.4984	4.6596	5.2953	2.8323	4.3871	4.0169	4.4656	4.4285	4.7673	4.4452
hsa-miR-4753-5p	0.332164	2.75408	0.00138096	-2.42192	5.35883	DOWN		0	0	0	0	0	3.6538	0	0	0	0	0	0	3.0509	4.6596	3.3233	2.7328	4.1647	0	4.5725	0	3.8198	3.9713
hsa-miR-4760-3p	0	4.95807	1.49436e-14	-4.95807	31.0834	DOWN		0	0	0	0	0	0	0	0	0	0	0	3.8964	4.8394	6.0442	5.4043	4.9027	4.1647	4.0169	6.6356	5.0659	4.5974	4.9713
hsa-miR-4760-5p	0	1.82065	0.00317756	-1.82065	3.53239	DOWN		0	0	0	0	0	0	0	0	0	0	0	3.8964	0	4.1901	3.0823	2.3849	0	0	3.0871	0	0	3.3863
hsa-miR-4766-5p	0.356082	2.74488	0.00178561	-2.3888	5.23722	DOWN		0	0	0	0	0	3.9169	0	0	0	0	0	0	2.9134	5.1335	3.5298	3.1734	4.0392	0	3.8527	4.1654	0	3.3863
hsa-miR-4781-5p	0.437764	2.61999	0.00483386	-2.18223	4.53854	DOWN		0	0	0	0	4.8154	0	0	0	0	0	0	0	3.9838	3.9491	2.9448	2.5104	0	3.6384	4.5201	0	3.4719	3.8014
hsa-miR-4782-5p	0.354182	5.42683	1.95262e-11	-5.07265	33.6526	DOWN		0	3.896	0	0	0	0	0	0	0	0	0	5.1188	5.3464	5.8116	6.0152	5.1349	5.2236	5.0713	5.994	5.5805	4.5974	5.8014
hsa-miR-4788	0.7577	3.25898	0.00244682	-2.50128	5.66188	DOWN		0	0	0	0	0	4.1393	0	4.1954	0	0	0	3.7708	4.2919	4.9491	3.7928	3.2474	0	3.6384	4.8527	0	3.3344	3.9713
hsa-miR-4789-5p	0	2.66091	0.00011551	-2.66091	6.32431	DOWN		0	0	0	0	0	0	0	0	0	0	0	0	3.5915	5.2445	3.0823	2.3849	0	0	3.7652	4.2585	3.3344	3.6087
hsa-miR-4796-5p	0	2.44009	0.00323725	-2.44009	5.42676	DOWN		0	0	0	0	0	0	0	0	0	0	0	0	4.5457	5.6596	3.0823	0	0	0	4.4656	5.1165	0	3.9713
hsa-miR-4804-3p	0.686627	3.23253	0.00174495	-2.5459	5.83972	DOWN		0	0	0	0	0	0	0	3.7099	0	0	3.843	4.7037	3.7614	5.2445	3.8708	2.3849	3.9017	3.6384	0	4.718	3.3344	0
hsa-miR-484	9.09749	10.2476	5.13334e-06	-1.15007	2.21925	DOWN		9.1941	9.0876	9.1683	8.7988	8.5636	9.4534	9.0604	9.5276	9.6023	8.7377	8.8786	11.501	10.396	10.599	9.7117	10.359	10.24	10.456	10.025	9.7282	9.9373	9.77
hsa-miR-488-5p	0.402545	2.84276	0.0021184	-2.44022	5.42724	DOWN		0	0	0	0	0	0	0	0	0	0	4.428	3.6333	0	4.8116	4.0152	3.1734	0	0	3.9351	3.718	4.0125	3.9713
hsa-miR-490-5p	0	1.64803	0.0098957	-1.64803	3.13405	DOWN		0	0	0	0	0	0	0	0	0	0	0	0	3.0509	0	3.3233	0	4.2802	3.9014	3.5725	0	0	0
hsa-miR-5007-5p	5.0327	3.70826	0.00794792	1.32444	2.50435	UP		4.8936	5.3434	4.755	4.9841	6.0633	5.5018	3.9599	4.4755	4.176	5.9856	5.2215	4.1188	4.2354	4.8116	4.0823	2.8323	3.9017	0	4.2888	4.5065	3.8198	4.1937
hsa-miR-500a-3p	1.96267	5.46396	6.8756e-05	-3.50129	11.3238	DOWN		0	0	4.3765	4.4987	4.1373	0	3.5814	0	4.9955	0	0	5.8033	5.5457	5.775	4.9083	5.9698	4.9017	5.2706	4.8096	5.5065	5.4719	6.1412
hsa-miR-501-3p	5.10083	6.87168	8.10192e-09	-1.77085	3.41256	DOWN		5.1281	5.3434	4.8619	5.4987	4.6228	5.7242	5.0144	5.388	5.374	4.8252	4.3284	7.6864	7.4741	7.4085	6.6563	7.0392	6.4624	6.7922	6.409	6.5065	6.4218	6.7321
hsa-miR-501-5p	2.75319	4.70327	0.00949731	-1.95008	3.86396	DOWN		5.0541	0	0	4.8772	4.4004	4.3319	3.7189	0	0	4.0596	3.843	4.6333	4.4495	4.8819	4.9804	4.0547	4.9721	4.0169	4.9746	5.346	4.8704	4.5562
hsa-miR-502-3p	2.51163	5.73938	0.000304374	-3.22775	9.36809	DOWN		0	4.3434	0	4.8772	0	4.2388	0	4.388	5.0428	4.7377	0	6.5209	5.8769	6.4438	5.6002	5.48	5.1033	5.9889	5.3799	5.6161	5.7673	5.3559
hsa-miR-505-3p	5.09438	5.72515	0.000672796	-0.630773	1.54839	DOWN		4.9761	5.6845	5.142	5.3467	4.4004	4.9758	4.5814	5.4324	4.8959	5.4381	5.1649	6.0118	6.1151	5.9815	5.7104	5.6259	5.709	5.6019	5.7425	4.8435	5.567	6.0681
hsa-miR-5096	0.413182	2.63235	0.00389979	-2.21916	4.65623	DOWN		0	0	0	0	0	0	0	0	0	4.545	0	0	0	4.5771	2.9448	2.5104	0	3.9014	3.5725	4.0659	4.2604	3.1233
hsa-miR-5100	0	3.53732	2.59162e-08	-3.53732	11.6102	DOWN		0	0	0	0	0	0	0	0	0	0	0	4.7037	4.1151	5.0132	3.2079	3.0129	4.3871	0	3.2246	3.718	3.9193	3.6087
hsa-miR-5187-3p	0	1.95748	0.00353711	-1.95748	3.88383	DOWN		0	0	0	0	0	0	0	0	0	0	0	0	3.0509	4.3965	0	2.2474	0	0	4.409	0	3.8198	3.6087
hsa-miR-5194	0.495455	2.78333	0.00665873	-2.28787	4.88336	DOWN		5.45	0	0	0	0	0	0	0	0	0	0	0	4.5457	4.6596	3.4303	2.3849	0	0	4.1575	4.2585	3.4719	3.7082
hsa-miR-532-5p	7.03081	8.17925	1.24715e-05	-1.14845	2.21675	DOWN		6.9147	6.9601	6.6984	7.0837	6.5158	7.4612	7.3888	7.3069	7.7324	6.6684	6.6085	9.2858	8.4772	8.2775	7.5055	8.4392	7.3742	8.2937	8.0367	8.3775	8.2023	7.7022
hsa-miR-542-3p	7.16703	6.46962	0.00644692	0.697409	1.62159	UP		7.0915	7.1508	7.4296	7.5343	7.1904	6.9758	7.2819	6.7279	7.0544	7.7711	6.6296	5.669	6.7311	7.1478	6.0823	6.2742	6.2802	5.871	6.8737	5.468	7.1924	7.5761
hsa-miR-548a-3p	2.74037	4.89094	0.0061692	-2.15056	4.44001	DOWN		4.3911	0	4.755	4.4987	0	0	4.5074	3.7099	4.176	0	4.106	3.6333	4.801	6.1901	5.3233	4.7583	5.0392	4.6384	4.9351	5.6848	3.4719	5.3249
hsa-miR-548a-5p	0	1.92341	0.00258718	-1.92341	3.79318	DOWN		0	0	0	0	0	0	0	0	0	0	0	0	3.4984	4.0746	3.5298	3.5693	0	0	3.2246	0	0	3.2608
hsa-miR-548ag	0.397864	3.05981	0.000375566	-2.66195	6.32886	DOWN		0	0	4.3765	0	0	0	0	0	0	0	0	4.0118	3.0509	0	0	2.7328	4.2802	4.0169	3.3502	4.0659	4.2604	3.8888
hsa-miR-548ar-5p	0.333955	2.89884	0.000970987	-2.56488	5.91707	DOWN		0	0	0	0	0	0	0	0	3.6735	0	0	0	3.5915	0	0	3.7328	4.5797	3.6384	3.6721	3.5805	4.536	4.5562
hsa-miR-548at-5p	0	2.09619	0.00288581	-2.09619	4.27579	DOWN		0	0	0	0	0	0	0	0	0	0	0	3.7708	2.9134	4.3965	0	3.449	0	0	0	4.346	4.1824	0
hsa-miR-548f-5p	0	2.06169	0.00256082	-2.06169	4.17475	DOWN		0	0	0	0	0	0	0	0	0	0	0	4.1188	3.7614	3.9491	0	3.3178	0	0	3.5725	3.959	0	0
hsa-miR-548l	1.99407	4.53472	0.0019831	-2.54065	5.81849	DOWN		0	4.137	4.755	0	0	0	4.7189	0	3.9955	0	4.3284	4.3114	4.1151	5.0746	4.0823	3.6259	4.6672	4.2233	4.7194	4.6508	4.6563	5.7556
hsa-miR-548y	1.13994	4.12205	9.75631e-05	-2.98212	7.90145	DOWN		4.3911	0	0	0	0	0	0	0	3.4105	4.7377	0	4.4813	3.679	4.6596	4.2079	2.9254	4.3871	4.3164	3.6721	4.5065	4.1824	4.3249
hsa-miR-550a-5p	0	1.84164	0.00304074	-1.84164	3.58416	DOWN		0	0	0	0	0	0	0	0	0	0	0	4.1188	2.9134	3.8116	3.3233	2.5104	0	0	0	3.5805	0	0
hsa-miR-552-3p	1.50247	4.15112	0.00297555	-2.64865	6.27078	DOWN		0	4.3434	0	0	0	4.1393	0	3.8474	0	4.1971	0	0	3.8394	4.4896	3.5298	4.449	5.7497	5.0169	5.257	3.5805	5.1417	4.6087
hsa-miR-554	2.32091	4.51908	0.00573731	-2.19817	4.58898	DOWN		0	4.137	5.142	0	0	0	3.5814	3.973	3.789	4.9076	0	3.7708	4.3464	5.8472	4.9083	3.6803	5.1033	4.2233	5.0506	4.2585	4.4719	4.0493
hsa-miR-5583-5p	0	3.20971	5.8756e-06	-3.20971	9.25164	DOWN		0	0	0	0	0	0	0	0	0	0	0	4.6333	4.3989	4.6596	3.6229	2.2474	4.0392	0	4.6232	3.959	0	3.1233
hsa-miR-5690	0.365591	2.26	0.00976838	-1.89441	3.7177	DOWN		0	4.0215	0	0	0	0	0	0	0	0	0	4.1188	3.3989	0	0	2.9254	0	0	3.3502	4.346	3.5974	3.1233
hsa-miR-5708	0	2.5195	0.000655714	-2.5195	5.73383	DOWN		0	0	0	0	0	0	0	0	0	0	0	0	4.2919	4.3965	3.4303	2.6259	3.9017	0	4.3502	4.718	0	0
hsa-miR-574-5p	7.33872	6.55827	0.00125357	0.780445	1.71766	UP		7.4643	7.0804	8.2737	6.4622	7.3546	7.1263	7.4092	7.763	7.327	6.8252	7.64	6.1694	6.7104	6.9326	6.9716	6.4253	6.7696	6.7922	6.0871	5.5439	6.4218	7.3171
hsa-miR-578	0	1.9697	0.00287656	-1.9697	3.91687	DOWN		0	0	0	0	0	0	0	0	0	0	0	0	3.1765	4.297	2.9448	3.3178	0	0	4.0871	3.8435	0	0
hsa-miR-584-3p	0	1.57381	0.0097237	-1.57381	2.9769	DOWN		0	0	0	0	0	0	0	0	0	0	0	0	0	0	3.4303	2.9254	0	0	3.5725	0	3.3344	4.0493
hsa-miR-589-5p	5.21755	6.1678	4.72689e-05	-0.950254	1.93221	DOWN		5.0541	4.524	4.9614	5.7617	4.5158	5.5798	5.2137	5.1429	5.3365	5.1971	6.106	6.7708	6.1914	6.271	6.1621	6.7134	5.4866	6.3608	5.8945	5.7821	6.2023	6.0108
hsa-miR-605-5p	0	2.24364	0.00253239	-2.24364	4.73589	DOWN		0	0	0	0	0	0	0	0	0	0	0	0	3.9134	4.297	0	0	4.5797	0	3.8527	4.0659	0	3.9713
hsa-miR-6071	0.388618	2.62605	0.00290821	-2.23743	4.71555	DOWN		0	0	0	0	4.2748	0	0	0	0	0	0	0	3.3989	3.9491	4.3233	2.5104	0	0	3.2246	4.5065	3.4719	3.5018
hsa-miR-6081	2.17989	5.36444	0.000146852	-3.18455	9.09167	DOWN		0	0	4.514	0	0	3.6538	3.7189	0	3.6735	4.1971	4.2215	4.1188	5.4495	5.4896	6.1307	4.9254	5.1647	3.9014	6.2246	5.2585	6.567	5.7786
hsa-miR-6085	0	1.54335	0.00954519	-1.54335	2.9147	DOWN		0	0	0	0	0	0	0	0	0	0	0	0	0	3.9491	3.2079	0	0	0	3.2246	0	3.4719	3.1233
hsa-miR-6126	6.5653	8.7231	3.20645e-08	-2.1578	4.46234	DOWN		6.639	6.3908	6.3399	6.4622	6.4301	7.3206	5.9599	6.5579	7.0074	6.3227	6.7878	7.7037	8.2281	9.0014	9.484	7.8621	8.2522	8.3333	9.811	8.5439	9.7757	8.9587
hsa-miR-6128	0	3.4998	1.84858e-06	-3.4998	11.3121	DOWN		0	0	0	0	0	0	0	0	0	0	0	0	4.0509	4.5771	3.8708	4.2108	4.1647	4.4039	0	4.8435	4.1824	4.1937
hsa-miR-6129	0.422236	2.57376	0.00407929	-2.15153	4.44298	DOWN		0	0	0	0	0	0	0	0	0	4.6446	0	0	3.4984	4.3965	4.0152	3.0129	0	0	3.3502	3.5805	3.3344	3.1233
hsa-miR-6131	1.53406	4.06132	0.00120332	-2.52725	5.76474	DOWN		0	0	0	0	4.1373	0	0	3.7099	4.3365	0	4.691	4.1188	3.5915	5.297	4.0152	3.5104	4.9721	3.6384	4.2888	3.8435	4.0125	3.3863
hsa-miR-6134	6.89792	5.79755	8.26153e-08	1.10037	2.1441	UP		6.9559	7.2439	7.4808	6.8206	7.0249	6.5018	7.001	6.6548	6.176	6.715	7.3024	5.7708	5.9838	5.9815	5.4809	5.6534	5.709	5.6384	5.9149	6.3029	5.536	5.8014
hsa-miR-621	3.96312	0.267709	4.0353e-07	3.69541	12.9547	UP		4.9761	0	5.142	4.7617	4.1373	4.7242	3.7189	4.2949	3.6735	4.3227	3.843	0	0	0	2.9448	0	0	0	0	0	0	0
hsa-miR-627-3p	0.375282	3.1476	0.000228013	-2.77232	6.83205	DOWN		4.1281	0	0	0	0	0	0	0	0	0	0	3.6333	3.4984	4.6596	4.0152	2.7328	0	0	4.3502	3.8435	3.9193	3.9713
hsa-miR-628-3p	8.42545	7.44798	1.6173e-07	0.977473	1.96901	UP		8.3218	8.116	8.4639	8.188	8.2911	8.2744	9.0144	8.2828	8.5274	8.4992	8.701	6.9979	7.4619	7.5877	7.6782	7.6568	7.9721	6.871	7.1915	7.3671	7.4719	7.6717
hsa-miR-652-3p	5.65746	6.47484	0.00015609	-0.817373	1.76219	DOWN		5.6641	6.137	5.142	5.3467	5.2748	5.6538	6.3256	5.1429	5.176	5.7821	6.5871	6.7208	6.3859	6.6596	6.8613	6.7647	6.5797	6.4457	6.3945	5.931	6.0348	6.4452
hsa-miR-660-5p	7.39732	9.56201	1.7422e-11	-2.16469	4.4837	DOWN		7.2656	7.524	6.9372	7.4987	6.9447	7.7665	7.5356	7.8958	7.8435	7.13	7.0289	10.197	9.7169	9.8002	9.2811	9.7631	9.0676	9.7131	9.3614	10.055	9.0181	9.2086
hsa-miR-663a	0.862973	3.2212	0.0059973	-2.35823	5.1274	DOWN		0	0	4.755	0	0	0	0	0	0	4.7377	0	0	3.9838	4.1901	3.3233	3.0954	4.7497	0	4.7194	3.8435	3.9193	3.6087
hsa-miR-664a-5p	7.79505	7.27336	0.000761487	0.521682	1.43563	UP		7.4643	7.9204	7.997	7.5691	7.8488	7.7582	7.8594	7.6826	7.7033	7.7489	8.1935	6.5012	7.1151	7.4669	7.8708	6.9534	7.591	7.0169	7.4726	7.0659	7.3253	7.6279
hsa-miR-664b-5p	5.19395	3.92407	0.00848156	1.26987	2.4114	UP		5.8061	4.6845	4.9614	5.3467	5.5703	5.3763	5.1664	4.4755	4.9955	5.3227	5.428	0	4.2354	5.1901	4.5298	3.0954	4.3871	4.2233	4.4656	4.2585	4.3344	4.4452
hsa-miR-665	0	1.92656	0.00290813	-1.92656	3.80149	DOWN		0	0	0	0	0	0	0	0	0	0	0	0	3.0509	4.4896	3.2079	3.0954	0	3.7759	3.5725	0	0	0
hsa-miR-6727-5p	0.501273	3.09025	0.00408971	-2.58898	6.01674	DOWN		0	0	5.514	0	0	0	0	0	0	0	0	4.4813	3.9838	5.0746	4.3233	5.2653	0	0	3.3502	0	3.7129	3.8014
hsa-miR-6729-3p	6.5708	5.80934	0.00303494	0.761464	1.69521	UP		6.7603	6.3908	7.1838	6.9581	6.9652	6.2861	6.1175	6.3653	5.9712	6.715	6.5655	6.2421	5.0834	6.5982	6.1621	4.4173	6.4377	6.1493	6.0131	5.6161	5.4048	5.7786
hsa-miR-6733-3p	0.310045	3.58202	3.75576e-06	-3.27197	9.65966	DOWN		0	0	0	0	0	0	0	0	3.4105	0	0	0	3.5915	4.7376	4.2079	2.3849	4.9721	4.1238	3.7652	4.2585	4.0999	3.2608
hsa-miR-6734-3p	1.15923	3.83848	0.000332715	-2.67925	6.40525	DOWN		0	0	0	0	0	0	3.8445	3.7099	0	5.1971	0	4.0118	3.9134	4.0746	3.7928	3.0129	4.3871	4.0169	3.9351	3.718	4.0999	3.2608
hsa-miR-6738-5p	0	2.61561	0.000126981	-2.61561	6.12882	DOWN		0	0	0	0	0	0	0	0	0	0	0	3.6333	0	5.1901	2.9448	2.2474	3.9017	0	3.0871	3.718	0	4.0493
hsa-miR-6747-3p	1.25709	3.67219	0.00535519	-2.4151	5.33356	DOWN		0	0	4.8619	0	0	0	0	0	0	4.9856	3.9805	3.7708	4.2354	5.534	3.5298	3.0954	0	4.0169	4.5201	3.718	3.7129	4.2608
hsa-miR-6748-3p	0	1.88559	0.0035321	-1.88559	3.69504	DOWN		0	0	0	0	0	0	0	0	0	0	0	0	3.2919	4.0746	3.3233	2.2474	4.5797	0	3.2246	0	0	0
hsa-miR-6752-3p	0.803836	2.94088	0.00726589	-2.13705	4.3986	DOWN		0	3.7585	0	5.0837	0	0	0	0	0	0	0	3.6333	2.9134	4.297	3.7104	2.8323	4.3871	0	0	3.718	3.4719	3.3863
hsa-miR-675-3p	0.392973	4.15115	0.000104055	-3.75817	13.5308	DOWN		0	0	0	0	0	0	0	0	0	4.3227	0	0	5.6576	6.534	4.8708	0	5.4866	4.4039	5.3799	5.931	3.5974	3.8014
hsa-miR-6756-3p	6.5161	5.76914	0.00497488	0.746964	1.67826	UP		6.7369	6.3192	6.8619	6.9316	6.3073	6.3763	5.5814	6.5173	6.3174	7.0775	6.6503	5.3558	6.3057	6.4438	5.4043	4.5402	6.2802	4.7759	6.3799	6.3029	5.8704	5.8014
hsa-miR-6767-3p	0.369055	2.54348	0.00766427	-2.17443	4.51407	DOWN		0	0	0	0	0	0	0	0	0	4.0596	0	0	3.2919	4.4896	3.0823	0	4.0392	0	4.5725	5.1165	0	3.3863
hsa-miR-6769b-3p	6.29925	5.21508	0.000414527	1.08416	2.12015	UP		6.7603	6.6065	7.2244	6.4622	6.1008	5.8555	5.2137	6.1429	5.8165	6.8874	6.2215	4.7708	5.679	6.4896	5.6002	4.5979	5.4866	4.3164	5.6959	5.1165	4.7673	4.8457
hsa-miR-6770-3p	0	2.19047	0.00320104	-2.19047	4.56455	DOWN		0	0	0	0	0	0	0	0	0	0	0	3.6333	3.2919	4.8116	0	0	5.1647	0	3.3502	3.8435	0	0
hsa-miR-6773-5p	0.421473	2.80976	0.0030622	-2.38829	5.23537	DOWN		0	0	0	4.6362	0	0	0	0	0	0	0	0	4.5457	5.0746	3.7104	2.9254	0	0	3.8527	3.718	3.8198	3.2608
hsa-miR-6779-3p	0.392973	3.9309	5.54658e-06	-3.53793	11.6151	DOWN		0	0	0	0	0	0	0	0	0	4.3227	0	4.3114	4.8769	5.3965	4.1465	0	3.9017	4.0169	4.6721	3.5805	4.536	3.8014
hsa-miR-6790-3p	0	1.90425	0.00356092	-1.90425	3.74315	DOWN		0	0	0	0	0	0	0	0	0	0	0	0	3.1765	4.7376	3.3233	2.3849	0	0	3.2246	0	4.0999	0
hsa-miR-6801-3p	0	4.88748	1.28591e-17	-4.88748	29.5991	DOWN		0	0	0	0	0	0	0	0	0	0	0	4.9553	4.679	5.3476	5.7104	4.0547	5.5339	4.0169	5.3799	4.4285	4.7673	4.8888
hsa-miR-6801-5p	0.341682	2.42078	0.00604312	-2.0791	4.22544	DOWN		0	3.7585	0	0	0	0	0	0	0	0	0	0	0	4.0746	3.5298	0	3.9017	4.2233	3.2246	4.0659	0	3.6087
hsa-miR-6804-3p	0	4.69802	4.64264e-16	-4.69802	25.9564	DOWN		0	0	0	0	0	0	0	0	0	0	0	4.4813	3.9134	5.9159	5.2079	4.1734	3.9017	4.4864	5.3198	5.3878	4.3344	4.5562
hsa-miR-6813-5p	1.12622	4.08925	0.000665692	-2.96304	7.79763	DOWN		0	0	4.755	0	0	0	3.9599	0	3.6735	0	0	0	4.1765	5.6189	4.6673	3.7328	4.2802	3.9014	5.4656	4.1654	4.4719	4.5018
hsa-miR-6822-3p	0.392973	3.14739	0.000295617	-2.75442	6.7478	DOWN		0	0	0	0	0	0	0	0	0	4.3227	0	4.1188	3.7614	4.9491	2.9448	0	4.1647	3.7759	3.3502	3.8435	3.7129	0
hsa-miR-6823-3p	1.95867	4.70805	0.00110575	-2.74938	6.72429	DOWN		4.2656	4.3434	0	0	0	3.9169	3.5814	0	0	5.4381	0	4.2183	4.5457	6.0132	4.0152	4.3178	5.8651	4.6384	4.6721	5.1654	4.0125	4.3249
hsa-miR-6826-5p	0	2.44465	0.000569789	-2.44465	5.44392	DOWN		0	0	0	0	0	0	0	0	0	0	0	0	4.0509	4.297	2.9448	0	4.1647	3.6384	4.409	0	0	3.3863
hsa-miR-6828-5p	0	1.63702	0.00991008	-1.63702	3.11022	DOWN		0	0	0	0	0	0	0	0	0	0	0	0	0	4.3965	0	0	0	0	3.5725	3.5805	3.3344	3.1233
hsa-miR-6830-3p	0.807582	3.65689	0.00189542	-2.84931	7.20655	DOWN		0	0	0	0	0	4.2388	0	0	0	4.6446	0	0	0	5.1335	2.9448	4.1734	4.9017	4.4039	5.1227	3.718	4.4719	5.3559
hsa-miR-6832-5p	0.371673	3.15128	0.00158871	-2.77961	6.86666	DOWN		0	0	0	0	0	0	0	4.0884	0	0	0	0	4.3989	6.1901	3.8708	2.7328	0	4.4039	5.2888	4.0659	3.7129	0
hsa-miR-6833-5p	1.5209	4.22916	0.000662542	-2.70826	6.53535	DOWN		0	3.896	0	0	4.5158	0	0	0	3.4105	4.9076	0	3.8964	4.0509	5.297	4.3233	3.0129	4.6672	4.1238	4.6721	4.346	3.4719	4.6593
hsa-miR-6838-3p	0	2.87468	6.04636e-05	-2.87468	7.33441	DOWN		0	0	0	0	0	0	0	0	0	0	0	3.6333	3.8394	4.1901	3.9448	3.1734	0	0	4.2888	3.8435	0	4.7082
hsa-miR-6843-3p	1.10087	4.2708	3.9248e-05	-3.16993	9.00001	DOWN		0	0	4.6395	0	0	0	0	0	3.4105	4.0596	0	5.2183	4.3464	4.9491	4.0152	2.8323	4.4866	4.1238	4.1575	4.1654	4.7129	3.9713
hsa-miR-6844	0	2.00061	0.00259	-2.00061	4.00169	DOWN		0	0	0	0	0	0	0	0	0	0	0	0	3.3989	4.0746	4.0152	0	0	0	3.4656	3.718	3.3344	0
hsa-miR-6845-3p	0.381555	2.74195	0.00696243	-2.3604	5.13513	DOWN		0	0	0	0	0	0	0	0	0	4.1971	0	0	4.7614	5.4438	3.2079	0	4.1647	0	4.8096	4.6508	0	3.1233
hsa-miR-6846-5p	1.00447	3.80253	0.000456322	-2.79805	6.95502	DOWN		0	0	0	0	0	3.7913	0	3.7099	3.548	0	0	3.6333	4.1151	5.1901	4.2668	3.0129	4.7497	0	4.0871	4.2585	3.7129	4.8014
hsa-miR-6847-5p	0.717727	2.96811	0.00314705	-2.25038	4.75809	DOWN		0	0	0	0	0	0	0	0	3.789	0	4.106	0	3.9134	3.8116	3.9448	2.5104	4.2802	0	4.0131	3.718	3.3344	3.1233
hsa-miR-6854-3p	5.18318	2.40915	0.000503491	2.77403	6.84015	UP		6.298	4.3434	6.2244	5.7617	5.7696	4.8555	4.7189	4.9116	3.6735	5.13	5.3284	0	3.1765	5.6596	4.2668	2.3849	4.0392	0	0	0	3.7129	3.2608
hsa-miR-6859-5p	7.91885	6.70918	5.06093e-06	1.20966	2.31284	UP		8.146	7.9042	8.3213	8.4435	8.1008	7.5217	7.4979	7.7543	7.4895	8.3302	7.5979	7.1188	6.7104	7.5664	7.1775	5.7834	6.9721	6.0169	7.069	6.6508	6.3344	6.4013
hsa-miR-6861-5p	0	3.72305	2.04166e-08	-3.72305	13.2054	DOWN		0	0	0	0	0	0	0	0	0	0	0	3.8964	4.4495	4.6596	4.2079	2.5104	4.7497	4.0169	4.6721	0	3.8198	3.9713
[truncated: 28 more rows]

## Sheet: Suppl Tab 6
Supplementary Table 6. Two group comparison: differential serum miRNAs between patients with cirrhosis vs. normal (FC>1.21 UP or DOWN, p-value<0.01)
[truncated: 416 more rows]

## Sheet: Suppl Tab 7
Supplementary Table 7. Two group comparison: differential serum miRNAs between patients with early HCC vs. cirrhosis (FC>1.33 UP or DOWN, p-value<0.01)
[truncated: 60 more rows]

[truncated: 3 more sheets: Suppl Tab 8, Suppl Tab 9, Suppl Tab 10]
